# Supplementary material for: Abiotic Stress-Responsive miRNA and Transcription Factor-Mediated Gene Regulatory Network in Oryza sativa: Construction and Structural Measure Study
Source: Front Genet. 2021 Feb 12;12:618089. doi: 10.3389/fgene.2021.618089 (PMC7907651; doi:10.3389/fgene.2021.618089)
Supplement: Supplementary Table 1 — Details of transcriptome raw data. [file Table_1.XLSX]

## Sheet: Sheet2
Supplementary Table S1| Details of transcriptome data.
miRNA expression dataset								mRNA expression dataset								Degradome datasets						AGO1-associated sRNA HTS data
Sl.No.	Plant Species	Series AccessionID	Sample AccessionID	Stress	Technique	Tissue		Sl.No.	Plant Species	Reprository	Series AccessionID	Number of samples	Stress	Platform	Tissue type	Sl.No.	Plant Species	SRA	RUN/SampleID	Tissue Type		Sl.No.	Plant Species	Series AccessionID	Sample AccessionID	Tissue Type
1	Oryza sativa	E-GEOD-26357	GSM647194	Cold	miRNA-Seq	inflorescences		1	Oryza sativa	NCBI-GEO	GSE21651	7	Salt	GPL2025	leave	1	Oryza sativa	SRP002288	SRR039716	Seedling		1	Oryza sativa	GSE18251	GSM455962	Seedling
2	Oryza sativa	E-GEOD-26357	GSM647192	Control	miRNA-Seq	inflorescences		2	Oryza sativa	NCBI-GEO	GSE16108	15	Salt	GPL2025	seedlings	2	Oryza sativa	SRP002288	SRR039717	Seedling		2	Oryza sativa	GSE18252	GSM455963	Seedling
3	Oryza sativa	E-GEOD-26357	GSM647193	Drought	miRNA-Seq	inflorescences		3	Oryza sativa	NCBI-GEO	GSE58603	28	Salt	GPL2025	leaf and root	3	Oryza sativa	SRP002288	SRR039720	Seedling		3	Oryza sativa	GSE18253	GSM455964	Seedling
4	Oryza sativa	E-GEOD-26357	GSM647195	Salt	miRNA-Seq	inflorescences		4	Oryza sativa	NCBI-GEO	GSE14403	23	Salt	GPL2025	root	4	Oryza sativa	SRP002288	SRR039719	Seedling
								5	Oryza sativa	NCBI-GEO	GSE83912	12	Cold	GPL2025	shoot and leaves	5	Oryza sativa	SRP002288	SRR039718	Seedling
								6	Oryza sativa	NCBI-GEO	GSE71680	32	Cold	GPL2025	shoot and leaves	6	Oryza sativa	SRP001724	SRR034102	Seedling
								7	Oryza sativa	NCBI-GEO	GSE38023	54	Cold	GPL2025	leaf
								8	Oryza sativa	NCBI-GEO	GSE37940	60	Cold	GPL2025	shoot
								9	Oryza sativa	NCBI-GEO	GSE41647	18	Drought	GPL2025	seedlings
								10	Oryza sativa	NCBI-GEO	GSE54466	12	Drought	GPL2025	leaves
								11	Oryza sativa	NCBI-GEO	GSE62308	4	Drought	GPL2025	leaves
								12	Oryza sativa	NCBI-GEO	GSE64576	8	Drought	GPL2025	leaves
								13	Oryza sativa	NCBI-GEO	GSE21651	8	Drought	GPL2025	leaves
								14	Oryza sativa	NCBI-GEO	GSE25176	16	Drought	GPL2025	leaves
								15	Oryza sativa	NCBI-GEO	GSE26280	36	Drought	GPL2025	leaves and root
