# Supplementary material for: Abiotic Stress-Responsive miRNA and Transcription Factor-Mediated Gene Regulatory Network in Oryza sativa: Construction and Structural Measure Study
Source: Front Genet. 2021 Feb 12;12:618089. doi: 10.3389/fgene.2021.618089 (PMC7907651; doi:10.3389/fgene.2021.618089)
Supplement: Supplementary Table 2 — List of differentially expressed genes under cold, drought, and salt stress in Oryza sativa. [file Table_2.XLSX]

## Sheet: Sheet2
Supplementary Table S2. List of differentially expressed genes.
Rice(Cold)																								Rice(Drought)																									Rice(Salt)
Probe ID	MSU7	RAPD	Gene ID	Gene Symbol	Pfam ID	UniProt Accession	Annotation	TF FAMILY	KEGG Gene ID	KEGG Orthology ID	KEGG Pathway ID	KEGG Pathway Info	KEGG Pathway Title	GO - Biological Process	GO - Cellular Component	GO - Molecular Function	Rank Product	logFoldChange	PFP (Percentage of False Positives)	P-value	D.E (Differential Expression)			Probe ID	MSU7	RAPD	Gene ID	Gene Symbol	Pfam ID	UniProt Accession	Annotation	TF FAMILY	KEGG Gene ID	KEGG Orthology ID	KEGG Pathway ID	KEGG Pathway Info	KEGG Pathway Title	GO - Biological Process	GO - Cellular Component	GO - Molecular Function	Rank Product	logFoldChange	PFP (Percentage of False Positives)	P-value	D.E (Differential Expression)				Probe ID
Os.9624.1.S1_a_at	LOC_Os08g42420.1,LOC_Os08g42420.2,LOC_Os08g42420.3,LOC_Os08g42420.4,LOC_Os08g42420.5	Os08g0536100,Os08g0536100,Os08g0536100,Os08g0536100,Os08g0536100	4346160	LOC4346160	PF13915; PF13889	Q6Z1G5; Q6Z1G6; Q6Z1G4	expressed protein	-	osa:4346160	-	-	-	-	-	-	-	2020.64	1.2513	0.0097	0.0024	Down			Os.11226.1.S1_at	LOC_Os03g56330.1	Os03g0774600	4334279	LOC4334279	-	Q8H8N9	expressed protein	-	osa:4334279	-	-	-	-	-	-	-	1820.53	1.2871	0.0091	0.0015	Down				Os.46608.1.A1_x_at
Os.27203.1.A1_at	LOC_Os07g14310.1	Os07g0246600	4342828	LOC4342828	PF05623	Q0D7H4	expressed protein	-	osa:4342828	-	-	-	-	-	-	-	2000.35	0.7401	0.009	0.002	up			Os.11646.1.S1_at	LOC_Os03g18510.1	Os03g0296400	4332538	LOC4332538	PF07541; PF00575	Q10MT2; Q2WEA7	expressed protein	-	osa:4332538	K03237	osa04141; osa03013	osa03013 [Pathway Title: RNA transport]; osa04141 [Pathway Title: Protein processing in endoplasmic reticulum]	Protein processing in endoplasmic reticulum; RNA transport	-	GO:0033290 [Name: eukaryotic 48S preinitiation complex]; GO:0043614 [Name: multi-eIF complex]; GO:0005851 [Name: eukaryotic translation initiation factor 2B complex]; GO:0005850 [Name: eukaryotic translation initiation factor 2 complex]	GO:0043022 [Name: ribosome binding]; GO:0003743 [Name: translation initiation factor activity]	1809.75	1.3814	0.0083	0.0014	Down				Os.39172.1.S1_at
Os.13973.2.S1_s_at	LOC_Os05g29020.1	Os05g0358400	4338530	LOC4338530	PF00481	Q6L482; Q6L483	expressed protein	-	osa:4338531	-	-	-	-	-	GO:0009570 [Name: chloroplast stroma]; GO:0005829 [Name: cytosol]	GO:0004722 [Name: protein serine/threonine phosphatase activity]; GO:0004724 [Name: magnesium-dependent protein serine/threonine phosphatase activity]; GO:0046872 [Name: metal ion binding]	1994.24	1.2191	0.0074	0.0018	Down			Os.12293.1.S1_a_at	LOC_Os04g52180.1,LOC_Os04g52180.2,LOC_Os04g52180.4,LOC_Os06g20080.1	Os04g0611300,Os04g0611300,Os04g0611300,None	4336956	LOC4336956	-	Q0JA86; Q0JMV4	expressed protein	-	osa:4336956	-	-	-	-	GO:0005975 [Name: carbohydrate metabolic process]	GO:0005739 [Name: mitochondrion]	GO:0046872 [Name: metal ion binding]; GO:0004556 [Name: alpha-amylase activity]	1804.96	0.7343	0.0083	0.0013	up				Os.23231.1.A1_at
Os.11041.1.S1_s_at	LOC_Os11g26890.1,LOC_Os11g26890.2	Os11g0456100,Os11g0456100	4350458	LOC4350458	PF05542; PF05251	A2ZDY7; Q5Z647; Q2R4Y4; A6N1M8; A6N0T8; Q2R4Y3	expressed protein	-	osa:4341334; osa:4350458	-	-	-	-	GO:0006487 [Name: protein N-linked glycosylation]	GO:0034998 [Name: oligosaccharyltransferase I complex]; GO:0016021 [Name: integral component of membrane]	-	1987.64	1.4727	0.0069	0.0017	Down			Os.18524.2.S1_at	LOC_Os03g01016.1,LOC_Os03g01016.2	Os03g0100050,Os03g0100050	9266989	LOC9266989	-	-	expressed protein	-	osa:9266989	-	-	-	-	-	-	-	1803.13	0.7395	0.0082	0.0013	up				Os.18850.1.S1_at
Os.11601.1.S1_at	LOC_Os10g22460.1	Os10g0370000	4348468	LOC4348468	PF07228	Q339D2	expressed protein	-	osa:4348468	-	-	-	-	-	GO:0009536 [Name: plastid]	GO:0046872 [Name: metal ion binding]; GO:0004721 [Name: phosphoprotein phosphatase activity]	1985.23	1.2442	0.0067	0.0016	Down			Os.17086.1.S1_at	LOC_Os09g25500.1	Os09g0422600	4347094	LOC4347094	PF04484	Q69P50	expressed protein	-	osa:4347094	-	-	-	-	GO:0051225 [Name: spindle assembly]; GO:0007098 [Name: centrosome cycle]	GO:0005880 [Name: nuclear microtubule]; GO:0005813 [Name: centrosome]; GO:0005737 [Name: cytoplasm]	-	1802.82	0.6665	0.0081	0.0013	up				Os.25117.1.A1_at
Os.18267.1.S1_at	LOC_Os08g05630.1	Os08g0152500	4344672	LOC4344672	PF10167	Q7EYH5	expressed protein	-	osa:4344672	-	-	-	-	-	-	-	1973.9	1.4497	0.0059	0.0014	Down			Os.11660.1.S1_at	LOC_Os04g49540.1	Os04g0584900	4336786	LOC4336786	-	Q7XP62	expressed protein	-	osa:4336786	-	-	-	-	GO:0010020 [Name: chloroplast fission]	GO:0009706 [Name: chloroplast inner membrane]; GO:0016021 [Name: integral component of membrane]; GO:0009941 [Name: chloroplast envelope]	-	1798.54	0.713	0.0078	0.0012	up				Os.8670.1.S1_at
Os.15287.1.S1_at	LOC_Os03g01920.1	Os03g0109700	4331348	LOC4331348	-	Q10SV7	expressed protein	-	osa:4331348	-	-	-	-	-	-	-	1962.88	1.2223	0.0053	0.0012	Down			Os.51616.1.S1_at	LOC_Os03g16600.1	Os03g0272900	4332399	LOC4332399	PF08137	Q10ND8	expressed protein	-	osa:4332399	-	-	-	-	-	-	-	1798.3	0.9086	0.0078	0.0012	up				Os.14248.1.S1_at
Os.8768.1.S1_a_at	LOC_Os02g48630.1	Os02g0717500	4330530	LOC4330530	-	Q6ZGV7	expressed protein	-	osa:4330530	-	-	-	-	-	-	GO:0051213 [Name: dioxygenase activity]	1947.68	0.8058	0.0052	0.0011	up			Os.49230.1.S1_at	LOC_Os03g04450.1	Os03g0137400	4331550	LOC4331550	PF14703; PF02714; PF13967	Q10S28	expressed protein	-	osa:4331550	-	-	-	-	GO:0006623 [Name: protein targeting to vacuole]	GO:0005886 [Name: plasma membrane]; GO:0016021 [Name: integral component of membrane]	GO:0005227 [Name: calcium activated cation channel activity]	1793.23	0.6734	0.0074	0.0011	up				Os.10659.1.S1_s_at
Os.8620.1.S1_at	LOC_Os11g37070.1,LOC_Os11g37070.2	Os11g0579700,Os11g0579700	4350781	LOC4350781	PF03468	B7F0F3	expressed protein	-	osa:4350781	-	-	-	-	-	GO:0009536 [Name: plastid]	-	1954.52	1.0473	0.0048	0.0011	Down			Os.6652.1.S1_x_at	LOC_Os10g39200.1,LOC_Os10g39200.3,LOC_Os10g39200.4,LOC_Os10g39200.2	Os10g0537300,Os10g0537300,Os10g0537300,Os10g0537300	4349242	LOC4349242	-	Q336W9; Q336X0	expressed protein	-	osa:4349242	-	-	-	-	-	-	-	1793.57	0.6908	0.0074	0.0011	up				Os.8314.1.S1_at
Os.38154.1.A1_at	LOC_Os06g05150.1	Os06g0143600	-	-	-	-	expressed protein	-	-	-	-	-	-	-	-	-	1940.42	1.3984	0.0042	0.001	Down			OsAffx.27508.82.S1_x_at	LOC_Os02g32469.1,LOC_Os02g32469.2	Os02g0525600,Os02g0525600	4329516	LOC4329516	-	Q0E0T0	expressed protein	-	osa:4329516	-	-	-	-	-	-	-	1799.05	1.186	0.0074	0.0012	Down				Os.27284.1.S1_at
Os.7896.1.S1_at	LOC_Os12g31440.1	Os12g0498300	9266982	LOC9266982	-	C7JAA6	expressed protein	-	osa:9266982	-	-	-	-	-	-	-	1922.12	0.785	0.004	0.0008	up			Os.13973.2.S1_s_at	LOC_Os05g29020.1	Os05g0358400	4338530	LOC4338530	PF00481	Q6L482; Q6L483	expressed protein	-	osa:4338531	-	-	-	-	-	GO:0009570 [Name: chloroplast stroma]; GO:0005829 [Name: cytosol]	GO:0004722 [Name: protein serine/threonine phosphatase activity]; GO:0004724 [Name: magnesium-dependent protein serine/threonine phosphatase activity]; GO:0046872 [Name: metal ion binding]	1796.79	1.3476	0.0073	0.0012	Down				Os.50221.1.S1_at
Os.11961.1.S1_at	LOC_Os05g38040.1,LOC_Os05g38040.2,LOC_Os05g38040.4	Os05g0454500,Os05g0454500,Os05g0454500	4338976	LOC4338976	-	Q60EN2	expressed protein	-	osa:4338976	-	-	-	-	-	-	-	1917.82	0.8506	0.0038	0.0008	up			Os.23129.1.A1_s_at	LOC_Os07g39840.1	Os07g0587100	4343755	LOC4343755	PF03407	B8B840; B9FY59; Q6ZIQ4	expressed protein	-	osa:4343755	-	-	-	-	GO:0071555 [Name: cell wall organization]	GO:0000139 [Name: Golgi membrane]	GO:0016757 [Name: transferase activity, transferring glycosyl groups]	1797.78	1.3759	0.0073	0.0012	Down				Os.6044.1.S1_at
Os.16733.1.S1_at	LOC_Os02g15750.1,LOC_Os02g15750.1	Os02g0257300,Os02g0257400	4328925	LOC4328925	-	Q6ETQ7	expressed protein	-	osa:4328925	-	-	-	-	-	GO:0016021 [Name: integral component of membrane]; GO:0098807 [Name: chloroplast thylakoid membrane protein complex]	-	1925	1.2063	0.0036	0.0008	Down			Os.14549.1.S1_at	LOC_Os01g40650.1	Os01g0589100	9267489	LOC9267489	-	Q5ZC74	expressed protein	-	osa:9267489	-	-	-	-	-	-	-	1796.15	1.344	0.0072	0.0012	Down				Os.15295.1.S1_at
Os.56167.1.S1_at	LOC_Os03g05800.1,LOC_Os03g05800.2	Os03g0152600,Os03g0152600	4331651	LOC4331651	-	Q10RN3	expressed protein	-	osa:4331651	-	-	-	-	-	GO:0009536 [Name: plastid]	-	1922.35	1.2847	0.0035	0.0008	Down			Os.174.1.S1_at	LOC_Os01g06470.1	Os01g0158000	4324088	LOC4324088	PF00514	Q9FYP9; Q0JQJ0	expressed protein	-	osa:4324088	-	-	-	-	GO:0006607 [Name: NLS-bearing protein import into nucleus]	GO:0005643 [Name: nuclear pore]; GO:0005829 [Name: cytosol]; GO:0005654 [Name: nucleoplasm]; GO:0048471 [Name: perinuclear region of cytoplasm]	GO:0008139 [Name: nuclear localization sequence binding]; GO:0008565 [Name: protein transporter activity]; GO:0061608 [Name: nuclear import signal receptor activity]	1788.65	0.7112	0.007	0.0011	up				Os.12063.1.S1_at
Os.11042.1.S1_at	LOC_Os05g37930.1,LOC_Os05g37930.2,LOC_Os05g37930.3	Os05g0453300,Os05g0453300,Os05g0453300	4338970	LOC4338970	-	Q6I645	expressed protein	-	osa:4338970	-	-	-	-	-	-	-	1905.25	0.8067	0.0032	0.0007	up			Os.54121.1.S2_s_at	LOC_Os04g02070.1,LOC_Os04g02070.2,LOC_Os04g02070.3,LOC_Os04g02070.4	Os04g0111500,Os04g0111500,Os04g0111500,Os04g0111500	4334934	LOC4334934	PF03081	Q0JFE0	expressed protein	-	osa:4334934	-	-	-	-	GO:0006887 [Name: exocytosis]; GO:0015031 [Name: protein transport]	GO:0000145 [Name: exocyst]	-	1788.95	1.47	0.0066	0.0011	Down				Os.47926.1.S1_at
Os.12751.1.S1_at	LOC_Os02g48470.1	Os02g0715300	4330520	LOC4330520	-	Q6ZHP7	expressed protein	-	osa:4330520	-	-	-	-	-	-	-	1893.56	1.0908	0.0028	0.0006	up			Os.7645.1.S1_at	LOC_Os02g41990.1,LOC_Os02g41990.2	Os02g0631000,Os02g0631000	4330055	LOC4330055	PF10058	Q6H475	expressed protein	-	osa:4330055	-	-	-	-	GO:0071786 [Name: endoplasmic reticulum tubular network organization]	GO:0071782 [Name: endoplasmic reticulum tubular network]; GO:0016021 [Name: integral component of membrane]	-	1782.95	0.6986	0.0066	0.001	up				Os.20269.1.S1_at
Os.6760.1.A1_at	LOC_Os02g45000.1	Os02g0671200	4330276	LOC4330276	PF03478	Q0DYS5	expressed protein	-	osa:4330276	-	-	-	-	-	GO:0005739 [Name: mitochondrion]	-	1893.81	0.7513	0.0028	0.0006	up			Os.26919.1.S1_at	LOC_Os04g32690.1	Os04g0398800	4335713	LOC4335713	PF10266	Q0JDJ8	expressed protein	-	osa:4335713	K18464	osa04144	osa04144 [Pathway Title: Endocytosis]	Endocytosis	-	GO:0071203 [Name: WASH complex]	-	1780.72	0.7495	0.0065	0.001	up				Os.20722.1.S1_a_at
Os.17718.1.S1_at	LOC_Os05g39410.1,LOC_Os05g39410.2,LOC_Os05g39410.3	Os05g0471000,Os05g0471000,Os05g0471000	4339075	LOC4339075	PF07714; PF08263; PF13855	Q6ATX3	expressed protein	-	osa:4339075	-	-	-	-	-	GO:0016021 [Name: integral component of membrane]	GO:0005524 [Name: ATP binding]; GO:0004672 [Name: protein kinase activity]	1891.39	0.8749	0.0027	0.0005	up			Os.6668.1.S1_at	LOC_Os03g01960.1	Os03g0110300	4331352	LOC4331352	-	Q10SV0	expressed protein	-	osa:4331352	-	-	-	-	-	GO:0016021 [Name: integral component of membrane]	-	1785.87	1.3441	0.0064	0.001	Down				Os.20722.2.S1_a_at
Os.8145.2.S1_at	LOC_Os03g18140.1	Os03g0291800	4332508	LOC4332508	PF14416; PF13839	Q0DSS4	expressed protein	-	osa:4332508	-	-	-	-	-	GO:0016021 [Name: integral component of membrane]	-	1880.71	1.0103	0.0024	0.0005	up			Os.6760.1.A1_at	LOC_Os02g45000.1	Os02g0671200	4330276	LOC4330276	PF03478	Q0DYS5	expressed protein	-	osa:4330276	-	-	-	-	-	GO:0005739 [Name: mitochondrion]	-	1776.11	1.0072	0.0062	0.0009	up				Os.4999.1.S1_at
Os.17828.1.S1_s_at	LOC_Os03g12550.1,LOC_Os03g12550.2	Os03g0226600,Os03g0226600	4332126	LOC4332126	-	A2XE49; Q8H856; B7EG01	expressed protein	-	osa:4332126	-	-	-	-	-	-	-	1876	0.8389	0.0023	0.0005	up			Os.10129.1.S1_at	LOC_Os04g01540.1	Os04g0105700	4334910	LOC4334910	-	Q84VC9	expressed protein	-	osa:4334910	-	-	-	-	-	GO:0009570 [Name: chloroplast stroma]	-	1777.68	1.2386	0.0058	0.0009	Down				Os.10822.1.S1_at
Os.14832.1.S1_at	LOC_Os08g16559.1	Os08g0266200	4345119	LOC4345119	-	Q6YTK7	expressed protein	-	osa:4345119	-	-	-	-	-	GO:0016021 [Name: integral component of membrane]	-	1857.98	0.8184	0.0019	0.0004	up			Os.11444.1.S1_at	LOC_Os03g15720.1,LOC_Os03g15720.2	Os03g0263700,Os03g0263700	4332336	LOC4332336	PF10961	Q10NP4	expressed protein	-	osa:4332336	-	-	-	-	GO:0032469 [Name: endoplasmic reticulum calcium ion homeostasis]; GO:0006816 [Name: calcium ion transport]	GO:0016021 [Name: integral component of membrane]; GO:0005789 [Name: endoplasmic reticulum membrane]; GO:0005794 [Name: Golgi apparatus]	-	1766.36	0.8689	0.0056	0.0008	up				Os.2196.1.S1_a_at
Os.47329.1.A1_at	LOC_Os05g11900.1	Os05g0209500	4338091	LOC4338091	-	Q75IK5	expressed protein	-	osa:4338091	-	-	-	-	-	GO:0016021 [Name: integral component of membrane]	-	1871.81	1.6734	0.0018	0.0004	Down			Os.11293.2.S1_x_at	LOC_Os03g58780.1,LOC_Os03g58780.2	Os03g0802300,Os03g0802300	4334465	LOC4334465	-	Q84SZ4	expressed protein	-	osa:4334465	-	-	-	-	-	-	GO:0046982 [Name: protein heterodimerization activity]	1762.65	0.6919	0.0054	0.0008	up				Os.4757.1.S2_at
Os.12311.2.S1_at	LOC_Os08g05660.1	Os08g0152800	9266786	LOC9266786	PF07851	A0A0P0XBR8	expressed protein	-	osa:9266786	-	-	-	-	-	GO:0016021 [Name: integral component of membrane]	-	1830.57	0.9006	0.0013	0.0003	up			Os.25107.1.S1_at	LOC_Os01g08750.3	Os01g0182900	4325331	LOC4325331	PF14649	Q5VRZ0	expressed protein	-	osa:4325331	K19026	-	-	-	-	-	-	1759.33	0.7288	0.0052	0.0008	up				Os.27473.1.S1_at
Os.18769.1.S1_at	LOC_Os05g14170.1	Os05g0230600	4338159	LOC4338159	PF07774; PF13360	Q75GB3	expressed protein	-	osa:4338159	-	-	-	-	GO:0034975 [Name: protein folding in endoplasmic reticulum]	GO:0072546 [Name: ER membrane protein complex]; GO:0005886 [Name: plasma membrane]; GO:0005794 [Name: Golgi apparatus]; GO:0005774 [Name: vacuolar membrane]	-	1815.8	1.3758	0.0009	0.0002	Down			OsAffx.13583.1.S1_at	LOC_Os03g62420.1	Os03g0840900	4334733	LOC4334733	PF04418; PF13947	B8AN69; Q6AVR1	expressed protein	-	osa:4334733	K17784	-	-	-	-	GO:0061617 [Name: MICOS complex]; GO:0005739 [Name: mitochondrion]	GO:0005509 [Name: calcium ion binding]; GO:0030247 [Name: polysaccharide binding]	1767.29	1.3717	0.0052	0.0008	Down				Os.51245.1.S1_at
Os.7521.1.S1_at	LOC_Os06g11990.1	Os06g0223800	4340531	LOC4340531	PF00168	Q67UI5	expressed protein	-	osa:4340531	-	-	-	-	-	GO:0005739 [Name: mitochondrion]	-	1799.63	0.957	0.0008	0.0002	up			Os.23798.1.S1_at	LOC_Os05g13790.1	Os05g0224900	4338141	CMT2	PF00145; PF00385; PF01426	Q5KQL9	expressed protein	-	osa:4338140	-	osa00270; osa01100	osa01100 [Pathway Title: Metabolic pathways]; osa00270 [Pathway Title: Cysteine and methionine metabolism]	-	GO:0010424 [Name: DNA methylation on cytosine within a CG sequence]; GO:0010216 [Name: maintenance of DNA methylation]	GO:0005634 [Name: nucleus]	GO:0003682 [Name: chromatin binding]; GO:0003886 [Name: DNA (cytosine-5-)-methyltransferase activity]; GO:0003677 [Name: DNA binding]	1763.49	1.4228	0.005	0.0008	Down				Os.8688.1.S1_a_at
Os.37365.1.S3_at	LOC_Os02g43519.1	Os02g0651500	4330169	LOC4330169	-	Q0DZ29	expressed protein	-	osa:4330169	-	-	-	-	-	GO:0016021 [Name: integral component of membrane]	-	1786.64	1.2559	0.0006	0.0001	Down			Os.54114.1.S1_at	LOC_Os04g43350.1	Os04g0513000	4336387	LOC4336387	-	Q0JBS2	expressed protein	-	osa:4336387	-	-	-	-	-	GO:0009535 [Name: chloroplast thylakoid membrane]	-	1758.81	1.1759	0.0048	0.0007	Down				Os.9976.1.S1_at
Os.6102.1.S1_s_at	LOC_Os06g40500.1	Os06g0607100	4341482	LOC4341482	-	Q69Q38	expressed protein	-	osa:4341482	-	-	-	-	-	GO:0016021 [Name: integral component of membrane]	GO:0004142 [Name: diacylglycerol cholinephosphotransferase activity]	1772.55	0.8783	0.0006	0.0001	up			Os.25308.1.A1_at	LOC_Os01g63050.1	Os01g0850000	4324862	LOC4324862	-	Q5N9T4	expressed protein	-	osa:4324862	-	-	-	-	-	-	-	1755.23	1.2211	0.0047	0.0007	Down				OsAffx.24369.11.S1_s_at
Os.10235.1.S1_at	LOC_Os07g48570.1	Os07g0685000	4344326	LOC4344326	PF02701	Q84PD2; C7DQE3	expressed protein	NAC	osa:4344326	-	-	-	-	GO:0006355 [Name: regulation of transcription, DNA-templated]	GO:0005634 [Name: nucleus]	GO:0043565 [Name: sequence-specific DNA binding]; GO:0003700 [Name: transcription factor activity, sequence-specific DNA binding]; GO:0003677 [Name: DNA binding]	1748.14	0.843	0.0004	0.0001	up			Os.52470.1.S1_at	LOC_Os03g48190.1,LOC_Os03g48190.2	Os03g0687200,Os03g0687200	4333761	LOC4333761	-	Q6AVV7	expressed protein	-	osa:4333761	-	-	-	-	-	GO:0009536 [Name: plastid]	-	1756.16	1.4424	0.0047	0.0007	Down				OsAffx.23593.1.S1_s_at
Os.11610.2.S1_at	LOC_Os02g42020.1,LOC_Os02g42020.2	Os02g0631200,Os02g0631200	4330057	LOC4330057	PF12579	Q0DZC5; Q6H473	expressed protein	-	osa:4330057	-	-	-	-	-	-	-	1738.35	0.8428	0.0003	0.0001	up			Os.6138.1.S1_at	LOC_Os01g05560.1	Os01g0148700	4325217	LOC4325217	PF07893	Q5ZED9	expressed protein	-	osa:4325217	-	-	-	-	-	-	-	1756.03	1.3519	0.0047	0.0007	Down				Os.22889.1.S1_s_at
Os.21058.1.S1_s_at	LOC_Os06g06040.1,LOC_Os06g06040.2,LOC_Os06g06040.3,LOC_Os06g06040.4,LOC_Os06g06040.5,LOC_Os06g06040.6	Os06g0153900,Os06g0153900,Os06g0153900,Os06g0153900,Os06g0153900,Os06g0153900	4340167	LOC4340167	PF05724	B7E650; Q5VMN3	expressed protein	-	osa:4340167	-	-	-	-	-	-	GO:0008757 [Name: S-adenosylmethionine-dependent methyltransferase activity]	1740.41	0.7168	0.0003	0.0001	up			Os.23268.1.S2_at	LOC_Os10g42196.1,LOC_Os10g42196.1	Os10g0572400,Os10g0572500	-	OSJNBa0095C07.35	-	B8BID2; Q8S7M6	expressed protein	-	-	-	-	-	-	-	-	GO:0046872 [Name: metal ion binding]; GO:0003677 [Name: DNA binding]	1744.1	0.6752	0.0044	0.0006	up				Os.4875.1.S1_at
Os.12279.1.S1_a_at	LOC_Os01g72009.1	Os01g0948600	-	-	-	-	expressed protein	-	-	-	-	-	-	-	-	-	1708.71	1.3693	0.0002	0	Down			Os.37994.2.S1_x_at	LOC_Os01g16550.1	Os01g0271700	9267815	LOC9267815	PF09495	C7IWD7	expressed protein	-	osa:9267815	-	-	-	-	-	-	-	1748.36	1.1977	0.0044	0.0007	Down				Os.15994.1.S1_at
Os.37365.1.S1_at	LOC_Os02g43519.1	Os02g0651500	4330169	LOC4330169	-	Q0DZ29	expressed protein	-	osa:4330169	-	-	-	-	-	GO:0016021 [Name: integral component of membrane]	-	1710.55	1.3526	0.0002	0	Down			Os.17347.1.S2_at	LOC_Os02g03840.2	Os02g0131100	4328194	LOC4328194	-	Q0E486; Q8RVR9	expressed protein	-	osa:4328194	-	-	-	-	-	-	-	1744.4	1.2286	0.0042	0.0006	Down				Os.13854.1.S1_at
Os.11918.1.S1_at	LOC_Os10g34400.1,LOC_Os10g34400.2	Os10g0485300,Os10g0485300	4348941	LOC4348941	PF12014	Q0IWV6	expressed protein	-	osa:4348941	-	-	-	-	GO:0000304 [Name: response to singlet oxygen]	GO:0009507 [Name: chloroplast]; GO:0042651 [Name: thylakoid membrane]	-	1600.1	0.6908	0.0001	0	up			OsAffx.3635.1.S1_s_at	LOC_Os03g57750.1,LOC_Os03g57750.2	Os03g0791432,Os03g0791432	9267929	LOC9267929	-	Q852J2	expressed protein	-	osa:9267929	-	-	-	-	-	-	-	1741.42	0.7578	0.0042	0.0006	up				Os.31379.1.S1_s_at
Os.12264.2.S2_a_at	LOC_Os03g12670.1,LOC_Os03g12670.2,LOC_Os03g12670.3	Os03g0227800,Os03g0227800,Os03g0227800	4332135	Os03g0227800	-	B7E365; B7E735; Q0DTS6	expressed protein	-	osa:4332135	-	-	-	-	-	-	-	1674.78	1.5771	0.0001	0	Down			Os.9965.1.S1_at	LOC_Os06g43550.1,LOC_Os06g43550.2	Os06g0642900,Os06g0642900	4341635	LOC4341635	PF02845	Q67WV6	expressed protein	-	osa:4341635	-	-	-	-	-	GO:0009536 [Name: plastid]	-	1739.22	0.6634	0.0041	0.0006	up				Os.9024.1.S1_at
Os.12787.1.S1_at	LOC_Os10g18340.1,LOC_Os10g18340.2	Os10g0330000,Os10g0330000	4348334	LOC4348334	-	Q7G649	expressed protein	-	osa:4348334	-	-	-	-	GO:0009408 [Name: response to heat]; GO:0010115 [Name: regulation of abscisic acid biosynthetic process]	-	-	1677.44	1.0158	0.0001	0	Down			Os.20524.1.S1_at	LOC_Os01g48310.1	Os01g0673900	4325907	LOC4325907	PF13639	Q0JKH8	expressed protein	-	osa:4325907	-	-	-	-	-	GO:0005774 [Name: vacuolar membrane]	GO:0008270 [Name: zinc ion binding]	1736.21	0.6478	0.004	0.0006	up				Os.22812.1.S1_a_at
Os.32834.1.S1_at	LOC_Os01g47620.1	Os01g0666500	4326861	LOC4326861	-	Q5QLQ8	expressed protein	-	osa:4326861	-	-	-	-	-	-	-	1644.82	0.7799	0.0001	0	up			Os.16051.1.S1_at	LOC_Os11g10780.1,LOC_Os11g10780.1	Os11g0213900,Os11g0214001	-	-	PF02902	-	expressed protein	-	-	-	-	-	-	-	-	-	1733.99	0.6474	0.0039	0.0006	up				Os.10488.1.S1_at
Os.5009.1.S1_at	LOC_Os02g06390.1	Os02g0158600	4328367	LOC4328367	-	Q6ET41	expressed protein	-	osa:4328367	-	-	-	-	-	-	-	1651.18	0.8134	0.0001	0	up			Os.34167.2.S1_x_at	LOC_Os01g26970.1,LOC_Os01g26970.2,LOC_Os01g26970.3,LOC_Os01g26970.5,LOC_Os01g26920.2,LOC_Os01g26920.1,LOC_Os01g26970.4	Os01g0367400,Os01g0367400,Os01g0367400,Os01g0367400,Os01g0367100,Os01g0367100,Os01g0367400	4325729	LOC4325729	-	B7E924; Q5JJM1	expressed protein	-	osa:4325729	-	-	-	-	-	-	-	1737.96	1.113	0.0039	0.0006	Down				Os.13497.1.S1_at
Os.51567.1.A1_at	LOC_Os03g11250.1	Os03g0210900	-	-	-	-	expressed protein	-	-	-	-	-	-	-	-	-	1650.71	1.4178	0.0001	0	Down			Os.15295.2.S1_x_at	LOC_Os08g19670.1	Os08g0293100	4345192	LOC4345192	-	Q84YX5; Q5JK34	expressed protein	-	osa:4345192; osa:4326942	-	-	-	-	-	-	-	1732.01	0.7035	0.0038	0.0005	up				Os.54450.1.S1_s_at
Os.7896.2.S1_at	LOC_Os12g31440.1	Os12g0498300	9266982	LOC9266982	-	A3CHJ9; C7JAA6; Q2QQD3	expressed protein	-	osa:9266982	-	-	-	-	-	-	-	1644.25	0.7203	0.0001	0	up			Os.51136.1.S1_at	LOC_Os03g17140.1	Os03g0279600	4332435	LOC4332435	-	Q10N76	expressed protein	-	osa:4332435	-	-	-	-	-	GO:0009536 [Name: plastid]	-	1734.69	1.2572	0.0038	0.0006	Down				Os.11184.1.S1_at
Os.9520.1.S1_at	LOC_Os08g08830.1	Os08g0187700	4344833	LOC4344833	PF04818	Q6ZAQ9	expressed protein	-	osa:4344833	K14400	osa03015	osa03015 [Pathway Title: mRNA surveillance pathway]	mRNA surveillance pathway	GO:0006369 [Name: termination of RNA polymerase II transcription]; GO:0006378 [Name: mRNA polyadenylation]	GO:0005737 [Name: cytoplasm]	GO:0003729 [Name: mRNA binding]; GO:0000993 [Name: RNA polymerase II core binding]	1661.09	0.7394	0.0001	0	up			Os.37955.1.S2_at	LOC_Os03g27019.1,LOC_Os03g27019.2,LOC_Os03g27019.3,LOC_Os03g27019.5,LOC_Os03g27019.6,LOC_Os03g27019.7	Os03g0387900,Os03g0387900,Os03g0387900,Os03g0387900,Os03g0387900,Os03g0387900	4333004	LOC4333004	-	Q10KE5	expressed protein	-	osa:4333004	-	-	-	-	GO:0006355 [Name: regulation of transcription, DNA-templated]; GO:0007623 [Name: circadian rhythm]	-	-	1730.33	1.2601	0.0036	0.0005	Down				Os.37869.2.S1_a_at
OsAffx.25117.1.S1_at	LOC_Os03g17210.1,LOC_Os03g17210.2	Os03g0280700,Os03g0280700	4332440	LOC4332440	PF14383; PF12552	Q0DSY6	expressed protein	-	osa:4332440	-	-	-	-	-	-	-	1618.94	0.698	0.0001	0	up			Os.52547.2.S1_at	LOC_Os07g18250.1,LOC_Os07g18250.2	Os07g0283200,Os07g0283200	4342934	LOC4342934	-	B7EZJ3; Q6YWI7	expressed protein	-	osa:4342934	-	-	-	-	-	GO:0016021 [Name: integral component of membrane]	-	1729.49	1.3819	0.0036	0.0005	Down				Os.12293.1.S1_a_at
Os.10048.1.S1_at	LOC_Os02g27960.1,LOC_Os02g27960.2	Os02g0481000,Os02g0481000	4329366	LOC4329366	PF16053	Q6K2L7	expressed protein	-	osa:4329366	-	-	-	-	-	GO:0005739 [Name: mitochondrion]	GO:0003735 [Name: structural constituent of ribosome]	1113.31	1.37	0	0	Down			Os.21863.1.S1_at	LOC_Os12g20144.1	Os12g0297400	4352027	LOC4352027	-	Q0INT4	expressed protein	-	osa:4352027	-	-	-	-	-	-	-	1723.8	0.7655	0.0035	0.0005	up				Os.6598.1.S1_at
Os.10388.1.S1_at	LOC_Os03g15920.1,LOC_Os03g15920.2,LOC_Os03g15920.3	Os03g0265900,Os03g0265900,Os03g0265900	4332353	LOC4332353	-	Q10NL7	expressed protein	-	osa:4332353	-	-	-	-	-	-	-	454.911	0.4983	0	0	up			Os.49582.1.S1_at	LOC_Os02g45930.1	Os02g0684400	4330344	LOC4330344	-	Q6ETZ7	expressed protein	-	osa:4330344	-	-	-	-	-	-	-	1718.24	0.7696	0.0032	0.0004	up				Os.12364.1.S1_at
Os.10410.1.S1_at	LOC_Os08g02210.1,LOC_Os08g02210.2	Os08g0114100,Os08g0114100	4344507	LOC4344507	PF13225	Q6YXS1	expressed protein	-	osa:4344507	-	-	-	-	-	-	-	1226.62	1.4884	0	0	Down			Os.40386.1.S1_at	LOC_Os10g25600.1	Os10g0395500	4348550	LOC4348550	PF10178	Q338M3	expressed protein	-	osa:4348550	K11877	-	-	-	-	-	-	1716.14	1.3672	0.0031	0.0005	Down				Os.49582.1.S1_at
Os.10693.2.S1_at	LOC_Os02g07980.1	Os02g0176400	4328479	LOC4328479	PF05915	Q6ETP4	expressed protein	-	osa:4328479	-	-	-	-	-	GO:0016021 [Name: integral component of membrane]	-	900.928	1.8543	0	0	Down			Os.44779.1.S1_at	LOC_Os07g49300.1	Os07g0693700	4344388	LOC4344388	PF12894	Q0D3C7	expressed protein	-	osa:4344388	K08518	-	-	-	GO:0016192 [Name: vesicle-mediated transport]; GO:0017157 [Name: regulation of exocytosis]	GO:0005886 [Name: plasma membrane]; GO:0005737 [Name: cytoplasm]; GO:0016021 [Name: integral component of membrane]	GO:0005096 [Name: GTPase activator activity]; GO:0019905 [Name: syntaxin binding]; GO:0017137 [Name: Rab GTPase binding]	1711.01	1.4278	0.003	0.0004	Down				Os.52778.1.S1_at
Os.10742.1.S1_at	LOC_Os03g06390.1	Os03g0159900	4331694	LOC4331694	-	Q10RG6	expressed protein	-	osa:4331694	-	-	-	-	-	-	-	997.304	0.4748	0	0	up			Os.7076.1.S1_at	LOC_Os07g08410.1	Os07g0181800	4342569	LOC4342569	PF09803	Q0D862	expressed protein	-	osa:4342569	-	-	-	-	GO:0033617 [Name: mitochondrial respiratory chain complex IV assembly]	GO:0005739 [Name: mitochondrion]; GO:0016021 [Name: integral component of membrane]	-	1709.16	1.3417	0.0029	0.0004	Down				Os.11263.1.A1_at
Os.10743.1.S1_at	LOC_Os06g33200.1	Os06g0523300	4341174	LOC4341174	-	Q0DBV7	expressed protein	-	osa:4341174	-	-	-	-	-	-	-	195.553	3.0935	0	0	Down			Os.20803.1.S1_a_at	LOC_Os01g49410.1	Os01g0688600	4327940	LOC4327940	PF07797	B8A7P1; Q5N7K6	expressed protein	-	osa:4327940	-	-	-	-	-	-	-	1706.23	1.2247	0.0028	0.0004	Down				Os.27807.1.S1_at
Os.11184.1.S1_at	LOC_Os04g31690.1	Os04g0386500	4335654	LOC4335654	PF04359	Q0JDQ2	expressed protein	-	osa:4335654	-	-	-	-	-	-	-	746.78	1.4635	0	0	Down			OsAffx.6135.1.S1_s_at	LOC_Os08g44470.1	Os08g0559000	4346313	LOC4346313	-	Q6YZI4	expressed protein	-	osa:4346313	-	-	-	-	-	GO:0016021 [Name: integral component of membrane]; GO:0005747 [Name: mitochondrial respiratory chain complex I]	-	1705.29	1.1398	0.0028	0.0004	Down				Os.27568.1.S1_at
Os.11511.1.S1_at	LOC_Os07g31490.1,LOC_Os07g31490.2	Os07g0498300,Os07g0498300	4343303	LOC4343303	-	Q7XIF7; B7E3F3	expressed protein	-	osa:4343303	-	-	-	-	-	GO:0005774 [Name: vacuolar membrane]; GO:0005747 [Name: mitochondrial respiratory chain complex I]; GO:0016021 [Name: integral component of membrane]	-	1585.61	1.4279	0	0	Down			Os.16024.1.S1_at	LOC_Os06g19650.1	Os06g0300700	4340824	LOC4340824	PF09184	Q5ZA33	expressed protein	-	osa:4340824	K15425	-	-	-	GO:0006470 [Name: protein dephosphorylation]	GO:0030289 [Name: protein phosphatase 4 complex]; GO:0005634 [Name: nucleus]; GO:0005737 [Name: cytoplasm]; GO:0005829 [Name: cytosol]	GO:0019888 [Name: protein phosphatase regulator activity]	1699.64	0.6835	0.0026	0.0003	up				Os.53103.1.S1_x_at
Os.11646.1.S1_at	LOC_Os03g18510.1	Os03g0296400	4332538	LOC4332538	PF07541; PF00575	Q10MT2; Q2WEA7	expressed protein	-	osa:4332538	K03237	osa04141; osa03013	osa03013 [Pathway Title: RNA transport]; osa04141 [Pathway Title: Protein processing in endoplasmic reticulum]	Protein processing in endoplasmic reticulum; RNA transport	-	GO:0033290 [Name: eukaryotic 48S preinitiation complex]; GO:0043614 [Name: multi-eIF complex]; GO:0005851 [Name: eukaryotic translation initiation factor 2B complex]; GO:0005850 [Name: eukaryotic translation initiation factor 2 complex]	GO:0043022 [Name: ribosome binding]; GO:0003743 [Name: translation initiation factor activity]	1139.42	1.4511	0	0	Down			OsAffx.24715.1.S1_at	LOC_Os02g44100.1,LOC_Os02g44100.2	Os02g0658300,Os02g0658300	4330209	LOC4330209	-	Q0DYZ0	expressed protein	-	osa:4330209	-	-	-	-	-	GO:0005739 [Name: mitochondrion]	-	1700.66	1.3653	0.0026	0.0004	Down				Os.49431.1.S1_at
Os.11834.1.S1_at	LOC_Os06g51390.1,LOC_Os06g51390.2	Os06g0730300,Os06g0730300	4342146	LOC4342146	PF05705	Q0D9A4	expressed protein	-	osa:4342146	-	-	-	-	-	-	-	250.359	0.3299	0	0	up			Os.4950.2.S1_a_at	LOC_Os07g01060.1,LOC_Os07g01060.2,LOC_Os07g01060.3	Os07g0100500,Os07g0100500,Os07g0100500	4342164	LOC4342164	-	A3BFP6; A2YH96; Q69LA4	expressed protein	-	osa:4342164	-	-	-	-	-	-	-	1696.55	1.4487	0.0025	0.0004	Down				Os.10214.1.S1_at
Os.12058.1.S1_at	LOC_Os02g49870.1,LOC_Os02g49870.1,LOC_Os02g49870.2,LOC_Os02g49870.2	Os02g0731600,Os02g0731800,Os02g0731600,Os02g0731800	4330625	LOC4330625	PF14159	Q0DXV3	expressed protein	-	osa:4330625	-	-	-	-	-	GO:0009535 [Name: chloroplast thylakoid membrane]; GO:0016021 [Name: integral component of membrane]	-	499.642	1.9801	0	0	Down			Os.10057.1.S1_at	LOC_Os12g42370.1	Os12g0618300	4352809	LOC4352809	PF01926	Q2QM41	GTPase of unknown function domain containing protein, putative, expressed	-	osa:4352809	K14539	osa03008	osa03008 [Pathway Title: Ribosome biogenesis in eukaryotes]	Ribosome biogenesis in eukaryotes	-	GO:0005829 [Name: cytosol]	GO:0005525 [Name: GTP binding]	1691.45	0.6708	0.0024	0.0003	up				Os.37909.1.S1_at
Os.12112.1.S1_at	LOC_Os01g60830.1	Os01g0823600	4327573	LOC4327573	PF00187; PF00182	I3QD34; Q9SAY3; Q7Y1Z1; A2WWH6; Q8LRD0	expressed protein	-	osa:4338720; osa:4327573	-	-	-	-	GO:0005975 [Name: carbohydrate metabolic process]; GO:0016998 [Name: cell wall macromolecule catabolic process]; GO:0006032 [Name: chitin catabolic process]; GO:0000272 [Name: polysaccharide catabolic process]; GO:0006952 [Name: defense response]; GO:0050832 [Name: defense response to fungus]; GO:0009658 [Name: chloroplast organization]; GO:0045893 [Name: positive regulation of transcription, DNA…	-	GO:0008061 [Name: chitin binding]; GO:0004568 [Name: chitinase activity]; GO:0030247 [Name: polysaccharide binding]	314.55	2.2711	0	0	Down			Os.11342.1.S1_at	LOC_Os06g04390.1	Os06g0134900	4340034	LOC4340034	PF10248	Q5VNV0	expressed protein	-	osa:4340034	-	-	-	-	-	-	-	1688.47	0.7017	0.0023	0.0003	up				Os.38283.1.S3_a_at
Os.12264.1.S1_a_at	LOC_Os03g12670.1,LOC_Os03g12670.2,LOC_Os03g12670.3	Os03g0227800,Os03g0227800,Os03g0227800	4332135	Os03g0227800	-	B7E735; Q0DTS6; B7E365	expressed protein	-	osa:4332135	-	-	-	-	-	-	-	1625.81	1.4445	0	0	Down			Os.5345.1.S1_at	LOC_Os01g31629.1,LOC_Os01g31629.2,LOC_Os01g31629.3	Os01g0501000,Os01g0501000,Os01g0501000	4324477	LOC4324477	-	Q5QMV5	expressed protein	-	osa:4324477	-	-	-	-	-	GO:0016592 [Name: mediator complex]	-	1689.33	1.4406	0.0023	0.0003	Down				Os.15514.1.S1_at
Os.12264.2.S1_at	LOC_Os03g12670.2	Os03g0227800	4332135	-	-	B7E735; B7E365	expressed protein	-	osa:4332135	-	-	-	-	-	-	-	420.878	2.5364	0	0	Down			Os.54437.1.S1_at	LOC_Os09g36120.1	Os09g0530900	4347666	LOC4347666	PF09791	Q652K8	expressed protein	-	osa:4347666	-	-	-	-	-	GO:0009536 [Name: plastid]	-	1674.08	0.6875	0.002	0.0003	up				Os.18524.2.S1_at
Os.12279.2.S1_a_at	LOC_Os01g72009.1	Os01g0948600	-	-	PF12734	-	expressed protein	-	-	-	-	-	-	-	-	-	1499.73	1.4526	0	0	Down			Os.13995.1.S1_at	LOC_Os05g34470.1,LOC_Os05g34470.1,LOC_Os05g34470.2,LOC_Os05g34470.2	Os05g0417200,Os05g0417251,Os05g0417200,Os05g0417251	4338807	LOC4338807	-	Q688K6; A2Y4Q4; Q6AT71; Q0DI48	expressed protein	-	osa:4338807	-	-	-	-	GO:0006355 [Name: regulation of transcription, DNA-templated]; GO:0009658 [Name: chloroplast organization]	GO:0009570 [Name: chloroplast stroma]	-	1668	0.7495	0.0019	0.0002	up				Os.45029.1.S1_at
Os.12379.1.S1_at	LOC_Os08g32120.1	Os08g0416800	4345580	LOC4345580	-	Q6ZA67	expressed protein	-	osa:4345580	-	-	-	-	-	GO:0031410 [Name: cytoplasmic vesicle]	-	452.479	2.0661	0	0	Down			Os.20645.1.S1_at	LOC_Os07g10110.1	Os07g0200000	4342659	LOC4342659	PF16528	Q6Z371	expressed protein	-	osa:4342659	-	-	-	-	GO:0051601 [Name: exocyst localization]; GO:0001927 [Name: exocyst assembly]	GO:0000145 [Name: exocyst]	-	1671.01	1.2665	0.0019	0.0003	Down				Os.55391.1.S1_at
Os.13236.1.S1_at	LOC_Os01g01295.1	Os01g0102500	4326468	LOC4326468	-	Q93VY8	expressed protein	-	osa:4326468	-	-	-	-	-	-	-	882.023	0.6174	0	0	up			Os.10123.1.S1_at	LOC_Os01g58114.1,LOC_Os01g58114.1,LOC_Os01g58114.2	Os01g0793500,Os01g0793600,Os01g0793500	4324130	LOC4324130	-	Q5ZBU1	expressed protein	-	osa:4324130	-	-	-	-	-	-	-	1659.59	0.6547	0.0017	0.0002	up				Os.17546.5.A1_x_at
Os.13497.1.S1_at	LOC_Os03g13810.3	Os03g0241300	9271214	LOC9271214	-	Q10PA2	expressed protein	-	osa:9271214	-	-	-	-	-	-	-	125.615	0.2799	0	0	up			Os.14584.1.S1_s_at	LOC_Os06g36360.1,LOC_Os06g36360.1,LOC_Os06g36360.2,LOC_Os06g36360.2,LOC_Os06g36360.3,LOC_Os06g36360.3,LOC_Os06g36360.4,LOC_Os06g36360.4	Os06g0558700,Os06g0558766,Os06g0558700,Os06g0558766,Os06g0558700,Os06g0558766,Os06g0558700,Os06g0558766	9268632	LOC9268632	PF04926; PF04928; PF01909	Q5G7K1; C7J4C8	expressed protein	-	osa:9268632	K14376	osa03015	osa03015 [Pathway Title: mRNA surveillance pathway]	mRNA surveillance pathway	GO:0043631 [Name: RNA polyadenylation]; GO:0031123 [Name: RNA 3'-end processing]	GO:0005634 [Name: nucleus]	GO:0003723 [Name: RNA binding]; GO:0004652 [Name: polynucleotide adenylyltransferase activity]	1658	0.6568	0.0017	0.0002	up				Os.49994.1.S1_at
Os.13497.1.S2_at	LOC_Os03g13810.1,LOC_Os03g13810.2,LOC_Os03g13810.3	Os03g0241300,Os03g0241300,Os03g0241300	9271214	LOC9271214	-	Q10PA2	expressed protein	-	osa:9271214	-	-	-	-	-	-	-	78.1643	0.1282	0	0	up			Os.21058.1.S1_s_at	LOC_Os06g06040.1,LOC_Os06g06040.2,LOC_Os06g06040.3,LOC_Os06g06040.4,LOC_Os06g06040.5,LOC_Os06g06040.6	Os06g0153900,Os06g0153900,Os06g0153900,Os06g0153900,Os06g0153900,Os06g0153900	4340167	LOC4340167	PF05724	B7E650; Q5VMN3	expressed protein	-	osa:4340167	-	-	-	-	-	-	GO:0008757 [Name: S-adenosylmethionine-dependent methyltransferase activity]	1653.04	0.6908	0.0016	0.0002	up				Os.6228.1.S1_at
Os.13649.1.S1_at	LOC_Os02g03560.1,LOC_Os02g03560.2	Os02g0127900,Os02g0127900	4328170	LOC4328170	-	B7ETM0; Q0E4A9	expressed protein	-	osa:4328170	-	-	-	-	-	GO:0005739 [Name: mitochondrion]	-	1213.14	0.6377	0	0	up			Os.5202.1.S1_at	LOC_Os01g45439.1,LOC_Os01g45439.2	Os01g0641700,Os01g0641700	4326558	LOC4326558	PF03661	Q5VNW6	expressed protein	-	osa:4326558	-	-	-	-	-	GO:0016021 [Name: integral component of membrane]	-	1649.4	1.3821	0.0015	0.0002	Down				Os.8137.1.S1_at
Os.14157.1.S1_at	LOC_Os08g15500.1	Os08g0254900	4345098	LOC4345098	PF10615	Q0J6W9	expressed protein	-	osa:4345098	-	-	-	-	GO:0070455 [Name: positive regulation of heme biosynthetic process]; GO:0009791 [Name: post-embryonic development]; GO:0033014 [Name: tetrapyrrole biosynthetic process]; GO:0009767 [Name: photosynthetic electron transport chain]	GO:0009570 [Name: chloroplast stroma]; GO:0009534 [Name: chloroplast thylakoid]	GO:0043495 [Name: protein anchor]; GO:0048037 [Name: cofactor binding]	330.238	2.3676	0	0	Down			Os.8599.1.S1_at	LOC_Os04g42340.1	Os04g0501800	4336313	LOC4336313	PF06364	Q0JBZ1; Q4JF25	expressed protein	-	osa:4336313	-	-	-	-	-	-	-	1646.48	1.3192	0.0015	0.0002	Down				Os.11899.1.S1_at
Os.14301.1.S1_at	LOC_Os06g42490.1	Os06g0631300	9267232	LOC9267232	-	Q67IV4	expressed protein	-	osa:9267232	-	-	-	-	-	-	-	1430.39	0.6766	0	0	up			Os.10942.2.S1_x_at	LOC_Os05g02410.1	Os05g0114600	9269365	LOC9269365	PF00447	Q338B0; Q75L02; B0JD74	expressed protein	-	osa:9269365	K09419	-	-	-	GO:0061408 [Name: positive regulation of transcription from RNA polymerase II promoter in response to heat stress]; GO:0034605 [Name: cellular response to heat]	GO:0005634 [Name: nucleus]; GO:0005737 [Name: cytoplasm]	GO:0043565 [Name: sequence-specific DNA binding]; GO:0042802 [Name: identical protein binding]; GO:0003700 [Name: transcription factor activity, sequence-specific DNA binding]; GO:0000978 [Name: RNA polymerase II core promoter proximal region sequence-specific DNA binding]	1642.95	1.3399	0.0014	0.0002	Down				Os.11999.1.S1_at
Os.14393.1.S1_x_at	LOC_Os09g24970.1	Os09g0416600	9269387	LOC9269387	PF05910	Q6EQ09; Q6EQ08	expressed protein	-	osa:9269387	-	-	-	-	-	-	-	901.05	0.6094	0	0	up			Os.51234.1.S1_at	LOC_Os09g31360.1	Os09g0488700	4347433	LOC4347433	-	Q0J0Q1	expressed protein	-	osa:4347433	-	-	-	-	-	-	-	1639.87	0.7075	0.0014	0.0002	up				Os.18300.1.S1_at
Os.14402.1.S1_at	LOC_Os02g53210.1,LOC_Os02g53210.2,LOC_Os02g53210.4,LOC_Os02g53210.5,LOC_Os02g53210.7,LOC_Os02g53210.6,LOC_Os02g53210.3	Os02g0771800,Os02g0771800,Os02g0771800,Os02g0771800,Os02g0771800,Os02g0771800,Os02g0771800	4330875	LOC4330875	-	B7FAJ2; B7FAJ3; Q0DX63	expressed protein	-	osa:4330875	-	-	-	-	-	GO:0016021 [Name: integral component of membrane]	-	1352.37	0.7389	0	0	up			Os.9024.1.S1_at	LOC_Os02g38190.1	Os02g0595400	4329857	LOC4329857	PF03879	Q6ZI56	expressed protein	-	osa:4329857	-	-	-	-	-	-	-	1639.37	0.7802	0.0014	0.0002	up				Os.25130.1.S1_at
Os.14765.1.S1_at	LOC_Os07g47340.1	Os07g0669600	4344234	LOC4344234	-	Q7EZT2	expressed protein	-	osa:4344234	-	-	-	-	-	-	-	1108.19	0.6894	0	0	up			Os.9164.1.S1_at	LOC_Os04g49954.1	Os04g0589500	4336812	LOC4336812	-	Q7XM00	expressed protein	-	osa:4336812	-	-	-	-	-	-	-	1645.58	1.2377	0.0014	0.0002	Down				Os.27127.1.S1_a_at
Os.14899.1.S1_at	LOC_Os03g48260.1	Os03g0688200	4333766	LOC4333766	-	Q6AVI7	expressed protein	-	osa:4333766	-	-	-	-	-	GO:0009536 [Name: plastid]	-	1374.31	1.3564	0	0	Down			Os.11961.1.S1_at	LOC_Os05g38040.1,LOC_Os05g38040.2,LOC_Os05g38040.4	Os05g0454500,Os05g0454500,Os05g0454500	4338976	LOC4338976	-	Q60EN2	expressed protein	-	osa:4338976	-	-	-	-	-	-	-	1628.39	0.7899	0.0012	0.0002	up				Os.8084.1.S1_x_at
Os.15212.1.A1_a_at	LOC_Os01g72990.1,LOC_Os01g72990.2	Os01g0960400,Os01g0960400	4325243	LOC4325243	PF00069; PF08263; PF13855	B8A9J9; B8A9K1; Q5JN27; Q5JN26	expressed protein	-	osa:4325243	-	-	-	-	-	GO:0016021 [Name: integral component of membrane]	GO:0005524 [Name: ATP binding]; GO:0004672 [Name: protein kinase activity]; GO:0004674 [Name: protein serine/threonine kinase activity]	635.833	1.5718	0	0	Down			Os.15295.1.S1_at	LOC_Os08g19670.1	Os08g0293100	4345192	LOC4345192	-	Q84YX5	expressed protein	-	osa:4345192	-	-	-	-	-	-	-	1627.15	0.6792	0.0012	0.0001	up				OsAffx.25417.1.S1_s_at
Os.15427.1.S1_at	LOC_Os03g64020.1,LOC_Os03g64020.2	Os03g0857400,Os03g0857400	4334845	LOC4334845	-	Q84M73	expressed protein	-	osa:4334845	-	-	-	-	GO:0009773 [Name: photosynthetic electron transport in photosystem I]	GO:0016021 [Name: integral component of membrane]; GO:0009535 [Name: chloroplast thylakoid membrane]	GO:0016730 [Name: oxidoreductase activity, acting on iron-sulfur proteins as donors]	976.184	1.3813	0	0	Down			Os.34167.3.S1_x_at	LOC_Os01g26970.1,LOC_Os01g26970.3,LOC_Os01g26970.5,LOC_Os01g26970.2,LOC_Os01g26970.4	Os01g0367400,Os01g0367400,Os01g0367400,Os01g0367400,Os01g0367400	4325729	LOC4325729	-	Q5JJM1; B7E924; B8A879	expressed protein	-	osa:4325729	-	-	-	-	-	-	-	1633.4	1.1548	0.0012	0.0002	Down				Os.53103.1.S1_at
Os.15641.1.S1_at	LOC_Os01g73500.1,LOC_Os01g73500.2	Os01g0965900,Os01g0965900	4324469	LOC4324469	-	Q5JJV6	expressed protein	-	osa:4324469	-	-	-	-	-	GO:0005886 [Name: plasma membrane]	-	1578.66	0.8158	0	0	up			Os.25394.1.A1_at	LOC_Os05g31690.1,LOC_Os05g31690.1	Os05g0381600,Os05g0381700	4338638	LOC4338638	PF07839	Q6L4D0	expressed protein	-	osa:4338638	-	-	-	-	-	GO:0009536 [Name: plastid]	GO:0005516 [Name: calmodulin binding]	1618.97	0.6015	0.0011	0.0001	up				Os.16743.3.S1_at
Os.15811.1.S1_at	LOC_Os07g43010.1	None	4343951	LOC4343951	PF06645	Q7XI45	expressed protein	-	osa:4343951	-	-	-	-	GO:0048658 [Name: anther wall tapetum development]; GO:0006465 [Name: signal peptide processing]; GO:0009555 [Name: pollen development]	GO:0005787 [Name: signal peptidase complex]; GO:0016021 [Name: integral component of membrane]; GO:0005789 [Name: endoplasmic reticulum membrane]	GO:0008233 [Name: peptidase activity]	1448.4	0.6746	0	0	up			Os.46441.1.S1_at	LOC_Os06g50679.1,LOC_Os06g50715.1	Os06g0722300,Os06g0722650	9271485; 9270284	LOC9271485; LOC9270284	PF00046; PF08670; PF01852	A2WLR5; Q5QMZ9; B7EUW2; C7J3N9; C7J481	expressed protein	-	osa:4327348; osa:9266840	-	-	-	-	-	GO:0005634 [Name: nucleus]	GO:0003677 [Name: DNA binding]; GO:0008289 [Name: lipid binding]	1620.2	0.8415	0.0011	0.0001	up				Os.31151.2.S1_at
Os.15893.1.A1_at	LOC_Os03g52700.1,LOC_Os03g52700.1	Os03g0737100,Os03g0737200	9270217	LOC9270217	PF13934	I3QK18	expressed protein	-	osa:9270217	-	-	-	-	-	-	GO:0016874 [Name: ligase activity]	1215.92	1.3215	0	0	Down			Os.51300.1.S1_x_at	LOC_Os02g10500.1	Os02g0198500	4328631	LOC4328631	-	Q6H736; Q6H735	expressed protein	-	osa:4328631	-	-	-	-	-	GO:0016021 [Name: integral component of membrane]	-	1624.98	1.3375	0.0011	0.0001	Down				Os.46584.1.S1_at
Os.16435.1.S1_at	LOC_Os02g53410.1	Os02g0774200	4330887	LOC4330887	-	Q6Z7L2	expressed protein	-	osa:4330887	-	-	-	-	-	-	-	334.166	0.2618	0	0	up			Os.49238.1.S1_at	LOC_Os02g03370.1	Os02g0126000	4328153	LOC4328153	-	Q0E4C5	expressed protein	-	osa:4328153	-	-	-	-	-	-	-	1613.51	0.6919	0.001	0.0001	up				Os.8096.1.S1_at
Os.16884.1.S1_at	LOC_Os03g50870.1	Os03g0717900	4333917	LOC4333917	PF05542	Q10DW0; Q10DV9; A6N1R0	expressed protein	-	osa:4333917	-	-	-	-	-	-	-	916.306	1.5911	0	0	Down			Os.14832.1.S1_at	LOC_Os08g16559.1	Os08g0266200	4345119	LOC4345119	-	Q6YTK7	expressed protein	-	osa:4345119	-	-	-	-	-	GO:0016021 [Name: integral component of membrane]	-	1612.41	1.2771	0.0009	0.0001	Down				Os.17506.1.S1_at
Os.16999.1.A1_at	LOC_Os03g24950.1	Os03g0364700	4332908	LOC4332908	PF08711	Q10KZ5; Q0DRQ1	expressed protein	-	osa:4332908	-	-	-	-	-	GO:0005634 [Name: nucleus]	-	814.977	0.5135	0	0	up			Os.18248.1.S1_at	LOC_Os03g08000.1	Os03g0177300	4331809	LOC4331809	PF12483	Q10R01	expressed protein	-	osa:4331809	K15688	-	-	-	GO:0006996 [Name: organelle organization]	GO:0009941 [Name: chloroplast envelope]; GO:0016021 [Name: integral component of membrane]	GO:0004842 [Name: ubiquitin-protein transferase activity]	1605.35	0.6069	0.0009	0.0001	up				Os.17889.1.S1_at
Os.174.1.S1_at	LOC_Os01g06470.1	Os01g0158000	4324088	LOC4324088	PF00514	Q9FYP9; Q0JQJ0	expressed protein	-	osa:4324088	-	-	-	-	GO:0006607 [Name: NLS-bearing protein import into nucleus]	GO:0005643 [Name: nuclear pore]; GO:0005829 [Name: cytosol]; GO:0005654 [Name: nucleoplasm]; GO:0048471 [Name: perinuclear region of cytoplasm]	GO:0008139 [Name: nuclear localization sequence binding]; GO:0061608 [Name: nuclear import signal receptor activity]; GO:0008565 [Name: protein transporter activity]	1540.17	0.6558	0	0	up			Os.50204.1.S1_at	LOC_Os03g11780.1	Os03g0217000	9266402	LOC9266402	-	Q10PY2	expressed protein	-	osa:9266402	-	-	-	-	-	-	-	1604.42	0.697	0.0009	0.0001	up				Os.50024.1.S1_at
Os.18384.1.S1_at	LOC_Os03g39830.1	Os03g0595300	4333370	LOC4333370	-	Q851H6	expressed protein	-	osa:4333370	-	-	-	-	-	GO:0016021 [Name: integral component of membrane]; GO:0009507 [Name: chloroplast]	-	183.833	2.3883	0	0	Down			Os.51659.1.S1_at	LOC_Os04g51960.1	Os04g0609100	4336936	LOC4336936	PF08312	Q0JAA4	expressed protein	-	osa:4336936	K13172	-	-	-	-	-	-	1604.06	0.6465	0.0009	0.0001	up				Os.12791.4.S1_x_at
Os.18449.1.S1_a_at	LOC_Os04g45650.2	Os04g0539500	4336532	LOC4336532	PF00320	Q0JBD6	expressed protein	MYB	osa:4336532	-	-	-	-	-	-	GO:0008270 [Name: zinc ion binding]; GO:0003700 [Name: transcription factor activity, sequence-specific DNA binding]; GO:0043565 [Name: sequence-specific DNA binding]	1173.98	2.1733	0	0	Down			Os.11041.1.S1_s_at	LOC_Os11g26890.1,LOC_Os11g26890.2	Os11g0456100,Os11g0456100	4350458	LOC4350458	PF05542; PF05251	A2ZDY7; Q5Z647; Q2R4Y4; A6N1M8; A6N0T8; Q2R4Y3	expressed protein	-	osa:4341334; osa:4350458	-	-	-	-	GO:0006487 [Name: protein N-linked glycosylation]	GO:0034998 [Name: oligosaccharyltransferase I complex]; GO:0016021 [Name: integral component of membrane]	-	1599.86	1.4632	0.0008	0.0001	Down				Os.27014.1.S1_at
Os.18634.1.S1_at	LOC_Os04g44560.1	Os04g0527800	4336463	LOC4336463	-	Q7XKI6	expressed protein	-	osa:4336463	-	-	-	-	-	GO:0009535 [Name: chloroplast thylakoid membrane]; GO:0009941 [Name: chloroplast envelope]; GO:0016021 [Name: integral component of membrane]	-	1287.77	1.4408	0	0	Down			Os.14153.3.S1_x_at	LOC_Os05g02070.2,LOC_Os05g02070.3	Os05g0111300,Os05g0111300	4337596	LOC4337596	PF01439; PF01535; PF12854; PF13041	A3AZ88; Q76C22; B7E2X6; A2XZL0; E5D3L3	expressed protein	-	osa:4337596	-	-	-	-	GO:0072593 [Name: reactive oxygen species metabolic process]	GO:0005829 [Name: cytosol]; GO:0005739 [Name: mitochondrion]	GO:0046872 [Name: metal ion binding]	1597.73	0.7208	0.0008	0.0001	up				Os.48138.1.S1_at
Os.18653.1.S1_at	LOC_Os03g24844.1,LOC_Os03g24844.3	Os03g0363400,Os03g0363400	4332899	LOC4332899	PF03692	Q10L09	expressed protein	-	osa:4332899	K06940	-	-	-	-	GO:0005739 [Name: mitochondrion]	-	1465.96	1.3373	0	0	Down			Os.15671.1.A1_at	LOC_Os12g39840.1	Os12g0588900	4352669	LOC4352669	PF10288	Q2QMW0	expressed protein	-	osa:4352669	K14169	osa04122	osa04122 [Pathway Title: Sulfur relay system]	Sulfur relay system	GO:0032447 [Name: protein urmylation]; GO:0002143 [Name: tRNA wobble position uridine thiolation]	GO:0005829 [Name: cytosol]	GO:0000049 [Name: tRNA binding]; GO:0016779 [Name: nucleotidyltransferase activity]; GO:0016783 [Name: sulfurtransferase activity]	1599.17	1.3131	0.0008	0.0001	Down				Os.6581.1.S1_at
Os.19036.1.S1_at	LOC_Os06g15700.1	Os06g0267600	4340716	LOC4340716	PF09333	Q5Z9U9	expressed protein	-	osa:4340716	K17906	-	-	-	GO:0030242 [Name: pexophagy]	-	-	1480.58	0.7124	0	0	up			Os.17240.1.S1_at	LOC_Os05g33610.1,LOC_Os05g33610.2	Os05g0405900,Os05g0405900	4338754	LOC4338754	PF12490	Q0DI99	expressed protein	-	osa:4338754	-	-	-	-	GO:0042594 [Name: response to starvation]	GO:0005737 [Name: cytoplasm]	-	1593.79	0.6914	0.0008	0.0001	up				OsAffx.4145.1.S1_x_at
Os.19100.1.S1_at	LOC_Os03g53300.1,LOC_Os03g53300.2	Os03g0744700,Os03g0744700	4334078	LOC4334078	-	Q84MP5; A3AML4; B8AJU9	expressed protein	-	osa:4334078	-	-	-	-	-	-	-	356.444	1.9869	0	0	Down			Os.20075.1.S1_at	LOC_Os03g01570.1,LOC_Os03g01570.2	Os03g0106000,Os03g0106000	4331318	LOC4331318	PF01062	Q8H7T9	expressed protein	-	osa:4331318	-	-	-	-	-	-	-	1593.59	0.6949	0.0008	0.0001	up				Os.23802.1.A1_at
Os.19401.1.S1_at	LOC_Os03g04100.1,LOC_Os03g04100.2	Os03g0133300,Os03g0133300	4331522	LOC4331522	-	Q0DVF0	expressed protein	-	osa:4331522	-	-	-	-	-	-	-	280.279	0.617	0	0	up			Os.44707.1.S1_at	LOC_Os07g36410.1	Os07g0548800	4343534	LOC4343534	PF04398	Q0D5N0	expressed protein	-	osa:4343534	-	-	-	-	-	GO:0031410 [Name: cytoplasmic vesicle]	-	1603.17	1.4295	0.0008	0.0001	Down				Os.55270.1.S1_s_at
Os.20642.1.S1_at	LOC_Os02g08540.1	Os02g0182700	4328519	LOC4328519	-	Q6H7Z8	expressed protein	WRKY	osa:4328519	-	-	-	-	-	-	-	649.304	0.5663	0	0	up			Os.4660.1.S1_s_at	LOC_Os03g10860.1	Os03g0206400	4331997	LOC4331997	-	Q8H071	expressed protein	-	osa:4331997	-	-	-	-	-	GO:0005739 [Name: mitochondrion]	-	1597.25	1.1359	0.0008	0.0001	Down				Os.16105.1.S1_at
Os.20722.3.A1_a_at	LOC_Os05g10754.1,LOC_Os05g10754.3,LOC_Os05g10754.2,LOC_Os11g20179.3,LOC_Os11g20179.1,LOC_Os11g20179.2	Os05g0196400,Os05g0196400,Os05g0196400,Os11g0307550,Os11g0307550,Os11g0307550	4338042	LOC4338042	-	Q0DK43	expressed protein	-	osa:4338042	-	-	-	-	-	-	-	1572.88	0.5897	0	0	up			Os.6884.1.S1_at	LOC_Os03g19580.1	Os03g0309000	4332622	LOC4332622	PF09459	Q10MH1	expressed protein	-	osa:4332622	-	-	-	-	-	GO:0016021 [Name: integral component of membrane]	GO:0020037 [Name: heme binding]	1591.62	0.6618	0.0008	0.0001	up				Os.16743.3.S1_x_at
Os.21592.1.S1_at	LOC_Os07g06550.1	Os07g0159500	4342444	LOC4342444	-	Q7XIM9	expressed protein	-	osa:4342444	-	-	-	-	-	-	-	1347.25	1.6007	0	0	Down			Os.12844.1.A1_a_at	LOC_Os07g40450.1	Os07g0595700	4343789	LOC4343789	-	Q84RV9	expressed protein	-	osa:4343789	-	-	-	-	-	GO:0016021 [Name: integral component of membrane]	-	1591.16	1.4729	0.0007	0.0001	Down				Os.17148.1.A1_at
Os.22948.1.S1_s_at	LOC_Os09g30350.1	Os09g0481300	4347396	LOC4347396	-	B8BCT5; Q646W9; Q0J0V7	expressed protein	-	osa:4347396	-	-	-	-	-	GO:0016021 [Name: integral component of membrane]	-	1379.81	0.6975	0	0	up			Os.46759.1.S1_at	LOC_Os03g58970.1,LOC_Os03g58970.2	Os03g0804400,Os03g0804400	4334486	LOC4334486	PF16528	Q75HJ8	expressed protein	-	osa:4334486	-	-	-	-	GO:0001927 [Name: exocyst assembly]; GO:0051601 [Name: exocyst localization]	GO:0000145 [Name: exocyst]	-	1579.92	0.684	0.0007	0.0001	up				Os.20504.1.A1_at
Os.25866.1.S1_x_at	LOC_Os07g14650.1,LOC_Os07g14650.2	Os07g0250300,Os07g0250300	4342842	LOC4342842	-	Q8GS79	expressed protein	-	osa:4342842	-	-	-	-	-	-	-	1278.32	0.5989	0	0	up			Os.10742.1.S1_at	LOC_Os03g06390.1	Os03g0159900	4331694	LOC4331694	-	Q10RG6	expressed protein	-	osa:4331694	-	-	-	-	-	-	-	1569.35	0.6523	0.0006	0.0001	up				Os.34167.2.S1_x_at
Os.26349.1.S1_at	LOC_Os04g44590.1,LOC_Os04g44590.5,LOC_Os04g44590.3,LOC_Os04g44590.4	Os04g0528100,Os04g0528100,Os04g0528100,Os04g0528100	4336466	LOC4336466	-	Q7XKI3	expressed protein	-	osa:4336466	-	-	-	-	-	GO:0016020 [Name: membrane]; GO:0009536 [Name: plastid]	-	1518.26	1.2566	0	0	Down			Os.14402.1.S1_at	LOC_Os02g53210.1,LOC_Os02g53210.2,LOC_Os02g53210.4,LOC_Os02g53210.5,LOC_Os02g53210.7,LOC_Os02g53210.6,LOC_Os02g53210.3	Os02g0771800,Os02g0771800,Os02g0771800,Os02g0771800,Os02g0771800,Os02g0771800,Os02g0771800	4330875	LOC4330875	-	B7FAJ2; B7FAJ3; Q0DX63	expressed protein	-	osa:4330875	-	-	-	-	-	GO:0016021 [Name: integral component of membrane]	-	1575.04	0.6654	0.0006	0.0001	up				Os.4634.1.S1_at
Os.26386.1.S1_a_at	LOC_Os04g57020.1,LOC_Os04g57020.2,LOC_Os04g57020.3	Os04g0665800,Os04g0665800,Os04g0665800	4337320	LOC4337320	PF04755	Q84P62; B7F0E5	expressed protein	-	osa:4337320	-	-	-	-	-	GO:0009536 [Name: plastid]	-	1181.63	1.3762	0	0	Down			Os.23065.1.S1_at	LOC_Os03g07870.1	Os03g0174800	-	-	-	B7EG04	expressed protein	-	-	-	-	-	-	-	-	-	1569.87	0.6203	0.0006	0.0001	up				Os.53189.1.S1_at
Os.26714.1.S1_at	LOC_Os03g55130.2	Os03g0758600	4334175	LOC4334175	PF05904	Q0DNE0; Q10CJ6	expressed protein	-	osa:4334175	-	-	-	-	-	-	-	1467.78	1.5798	0	0	Down			Os.27395.1.S1_a_at	LOC_Os04g57760.1	Os04g0674000	4337376	LOC4337376	-	Q7XQA2; Q0J938	expressed protein	-	osa:4337376	-	-	-	-	-	GO:0009536 [Name: plastid]	-	1569.31	0.6367	0.0006	0.0001	up				Os.55247.1.S1_at
Os.26735.1.S1_at	LOC_Os11g06440.1	Os11g0163800	4349868	LOC4349868	PF05633	Q53PP2	expressed protein	-	osa:4349868	-	-	-	-	-	-	-	1458.82	0.9035	0	0	up			Os.11597.1.S1_at	LOC_Os05g34820.1	Os05g0421300	4338831	LOC4338831	-	Q6L4Y6	expressed protein	-	osa:4338831	-	-	-	-	-	-	-	1568.45	1.3717	0.0005	0.0001	Down				Os.7219.1.S1_at
Os.27387.1.S1_at	LOC_Os01g17396.1,LOC_Os01g17396.2	Os01g0281100,Os01g0281100	4326913	LOC4326913	-	Q5NAB4	expressed protein	-	osa:4326913	-	-	-	-	GO:0007623 [Name: circadian rhythm]; GO:0006355 [Name: regulation of transcription, DNA-templated]	-	-	1516.68	0.8061	0	0	up			Os.17828.1.S1_s_at	LOC_Os03g12550.1,LOC_Os03g12550.2	Os03g0226600,Os03g0226600	4332126	LOC4332126	-	A2XE49; Q8H856; B7EG01	expressed protein	-	osa:4332126	-	-	-	-	-	-	-	1555.32	0.6692	0.0005	0.0001	up				Os.10235.1.S1_at
Os.27568.1.S1_at	LOC_Os05g51520.1	Os05g0593000	4339799	LOC4339799	PF13359	Q6L4R6	expressed protein	-	osa:4339799	-	-	-	-	-	-	-	842.282	0.611	0	0	up			Os.20989.1.S1_at	LOC_Os04g34620.1	Os04g0423700	4335845	LOC4335845	PF14360	Q7X8A2; Q7F937	expressed protein	-	osa:4335845	-	-	-	-	GO:0030148 [Name: sphingolipid biosynthetic process]	GO:0016021 [Name: integral component of membrane]	-	1550.18	0.7937	0.0005	0.0001	up				Os.11601.1.S1_at
Os.27687.1.S1_at	LOC_Os05g41190.1,LOC_Os05g41190.2	Os05g0490900,Os05g0490900	4339170	LOC4339170	-	Q6F333	expressed protein	-	osa:4339170	-	-	-	-	-	GO:0016021 [Name: integral component of membrane]	-	1622.74	1.4285	0	0	Down			Os.37365.1.S3_at	LOC_Os02g43519.1	Os02g0651500	4330169	LOC4330169	-	Q0DZ29	expressed protein	-	osa:4330169	-	-	-	-	-	GO:0016021 [Name: integral component of membrane]	-	1565.26	1.2287	0.0005	0.0001	Down				Os.12778.1.S2_at
Os.27759.1.S1_at	LOC_Os01g46720.1	Os01g0655500	4324179	LOC4324179	-	B9EYE5; Q5SN79; B8A6V2	expressed protein	-	osa:4324179	-	-	-	-	GO:0006468 [Name: protein phosphorylation]	GO:0005634 [Name: nucleus]; GO:0005737 [Name: cytoplasm]	GO:0004672 [Name: protein kinase activity]; GO:0005524 [Name: ATP binding]; GO:0004693 [Name: cyclin-dependent protein serine/threonine kinase activity]	640.912	1.575	0	0	Down			Os.45931.1.S1_at	LOC_Os04g33110.1,LOC_Os04g33110.2	Os04g0403900,Os04g0403900	9267281	LOC9267281	-	Q7XSC7	expressed protein	-	osa:9267281	-	-	-	-	-	-	-	1564.88	1.4649	0.0005	0.0001	Down				Os.27759.1.S1_at
Os.27800.1.A1_at	LOC_Os03g58740.1	Os03g0801900	4334462	LOC4334462	PF04601	Q10BX5	expressed protein	-	osa:4334462	-	-	-	-	-	-	-	532.98	0.5222	0	0	up			Os.5292.1.S1_at	LOC_Os03g63040.1,LOC_Os03g63040.1	Os03g0847800,Os03g0847851	-	-	-	-	expressed protein	-	-	-	-	-	-	-	-	-	1562.14	0.6327	0.0005	0.0001	up				Os.11961.1.S1_at
Os.27807.1.S1_at	LOC_Os03g01740.1	Os03g0107700	4331332	LOC4331332	-	Q10SY2	expressed protein	-	osa:4331332	-	-	-	-	GO:0071901 [Name: negative regulation of protein serine/threonine kinase activity]; GO:0007049 [Name: cell cycle]	GO:0005634 [Name: nucleus]	GO:0004861 [Name: cyclin-dependent protein serine/threonine kinase inhibitor activity]	28.471	0.0778	0	0	up			Os.5577.2.S1_a_at	LOC_Os04g59570.1,LOC_Os04g59570.2	Os04g0692200,Os04g0692200	4337512	LOC4337512	PF00171; PF12527	Q53NG8; A6MZG6; B7E442; Q0J8Q7	expressed protein	-	osa:4349966; osa:4337512	K00128	osa00340; osa01110; osa01130; osa00410; osa00053; osa00071; osa00280; osa00310; osa00561; osa00380; osa00620; osa00010; osa00903; osa01100; osa00040; osa00330	osa00071 [Pathway Title: Fatty acid degradation]; osa00340 [Pathway Title: Histidine metabolism]; osa01110 [Pathway Title: Biosynthesis of secondary metabolites]; osa00410 [Pathway Title: beta-Alanine metabolism]; osa00561 [Pathway Title: Glycerolipid metabolism]; osa00010 [Pathway Title: Glycolysis / Gluconeogenesis]; osa00040 [Pathway Title: Pentose and glucuronate interconversions]; osa00280 […	-	GO:0006081 [Name: cellular aldehyde metabolic process]	GO:0016021 [Name: integral component of membrane]	GO:0004028 [Name: 3-chloroallyl aldehyde dehydrogenase activity]; GO:0016620 [Name: oxidoreductase activity, acting on the aldehyde or oxo group of donors, NAD or NADP as acceptor]	1566.83	1.3121	0.0005	0.0001	Down				Os.20722.3.A1_a_at
Os.27857.1.S1_at	LOC_Os02g13060.1	Os02g0223700	4328767	LOC4328767	PF12023	Q6YVF0	expressed protein	-	osa:4328767	-	-	-	-	-	-	-	626.549	2.0972	0	0	Down			Os.8033.1.S1_at	LOC_Os06g28144.1	Os06g0475500	4341035	LOC4341035	-	Q0DC73	expressed protein	-	osa:4341035	-	-	-	-	-	-	-	1556.5	0.8206	0.0005	0.0001	up				Os.20989.1.S1_at
Os.34466.1.S1_s_at	LOC_Os01g07970.1	Os01g0175100	4327132	LOC4327132	-	Q5VQZ9	expressed protein	-	osa:4327132	-	-	-	-	-	-	-	373.013	0.229	0	0	up			Os.14877.1.S1_at	LOC_Os03g10180.1	Os03g0198300	4331953	LOC4331953	-	Q10QF7	expressed protein	-	osa:4331953	-	-	-	-	GO:0072583 [Name: clathrin-dependent endocytosis]; GO:0006898 [Name: receptor-mediated endocytosis]; GO:0072318 [Name: clathrin coat disassembly]	GO:0005737 [Name: cytoplasm]; GO:0043231 [Name: intracellular membrane-bounded organelle]; GO:0031982 [Name: vesicle]	GO:0030276 [Name: clathrin binding]	1550.34	1.4989	0.0004	0	Down				Os.23113.1.S1_at
Os.36435.2.S1_x_at	LOC_Os01g39280.1,LOC_Os05g18780.1,LOC_Os07g01020.1,LOC_Os10g01080.1,LOC_Os10g08960.1,LOC_Os10g11520.1,LOC_Os11g48080.1	None,Os05g0270500,Os07g0100200,Os10g0100700,Os10g0170501,Os10g0191600,Os11g0708500	-	-	PF01680	-	expressed protein	-	-	-	-	-	-	-	-	-	1406.98	1.5262	0	0	Down			Os.15969.1.S1_a_at	LOC_Os03g21270.1,LOC_Os03g21270.3	Os03g0330300,Os03g0330300	4332729	LOC4332729	-	Q10LY7; Q10LY8; B7E5B1	expressed protein	-	osa:4332729	-	-	-	-	-	-	-	1551.88	1.4675	0.0004	0	Down				Os.34466.1.S1_s_at
Os.3721.1.S1_at	LOC_Os01g03980.1	Os01g0130900	4325978	LOC4325978	-	Q9LGC2	expressed protein	-	osa:4325978	-	-	-	-	-	-	-	676.365	0.7778	0	0	up			Os.19378.1.S1_at	LOC_Os02g18940.1	Os02g0291500	4329061	LOC4329061	-	Q6K869	expressed protein	-	osa:4329061	-	-	-	-	-	-	-	1563.09	1.3211	0.0004	0.0001	Down				Os.37365.1.S1_at
Os.37537.1.S1_s_at	LOC_Os03g48626.1	Os03g0692700	9272634	LOC9272634	PF04398	Q10EV9; C7J023	expressed protein	-	osa:9272634	-	-	-	-	-	GO:0005773 [Name: vacuole]	-	1612.32	1.4332	0	0	Down			Os.51760.2.S1_at	LOC_Os03g46730.1,LOC_Os03g46730.3	Os03g0670000,Os03g0670000	4333684	LOC4333684	PF08213	Q0DPQ7; Q10FF2	expressed protein	-	osa:4333684	-	-	-	-	GO:0006397 [Name: mRNA processing]	-	-	1551.6	1.1958	0.0004	0	Down				Os.46304.1.S1_a_at
Os.37710.1.S1_at	LOC_Os04g33310.1	Os04g0405900	4335754	LOC4335754	-	Q0JDF9	expressed protein	-	osa:4335754	-	-	-	-	-	-	-	1061.37	0.6218	0	0	up			OsAffx.21381.1.S1_s_at	LOC_Os01g42140.1,LOC_Os01g42140.2	Os01g0606133,Os01g0606133	4324215	LOC4324215	-	A0A0P0V505	expressed protein	-	osa:4324215	-	-	-	-	-	GO:0005774 [Name: vacuolar membrane]; GO:0005886 [Name: plasma membrane]; GO:0005783 [Name: endoplasmic reticulum]; GO:0016021 [Name: integral component of membrane]	-	1516.67	0.5807	0.0004	0	up				Os.50438.1.S1_at
Os.37955.2.S1_at	LOC_Os03g27019.6	Os03g0387900	4333004	LOC4333004	-	Q10KE5	expressed protein	-	osa:4333004	-	-	-	-	GO:0006355 [Name: regulation of transcription, DNA-templated]; GO:0007623 [Name: circadian rhythm]	-	-	1012.99	0.6368	0	0	up			OsAffx.23086.1.S1_s_at	LOC_Os01g01970.1,LOC_Os01g01970.2	Os01g0109750,Os01g0109750	9266108	LOC9266108	-	C7IXD7	expressed protein	-	osa:9266108	-	-	-	-	GO:0006355 [Name: regulation of transcription, DNA-templated]	GO:0016021 [Name: integral component of membrane]; GO:0005634 [Name: nucleus]	-	1553.21	1.4403	0.0004	0	Down				Os.52371.1.S1_at
Os.38219.1.A1_at	LOC_Os03g48380.1	Os03g0689900	4333772	LOC4333772	-	A0A0P0W2C1	expressed protein	-	osa:4333772	-	-	-	-	-	-	-	1218.6	0.7101	0	0	up			Os.13734.1.S1_s_at	LOC_Os08g41460.1,LOC_Os08g41460.10,LOC_Os08g41460.2,LOC_Os08g41460.3,LOC_Os08g41460.4,LOC_Os08g41460.6,LOC_Os08g41460.8,LOC_Os08g41460.8,LOC_Os08g41460.9	Os08g0526300,Os08g0526300,Os08g0526300,Os08g0526300,Os08g0526300,Os08g0526300,Os08g0526200,Os08g0526300,Os08g0526300	4346096	LOC4346096	-	B7E6T2; Q7F1E4	expressed protein	-	osa:4346096	-	-	-	-	GO:0009773 [Name: photosynthetic electron transport in photosystem I]	GO:0009535 [Name: chloroplast thylakoid membrane]; GO:0016021 [Name: integral component of membrane]	GO:0016730 [Name: oxidoreductase activity, acting on iron-sulfur proteins as donors]	1541.81	1.5366	0.0003	0	Down				Os.53275.1.S1_at
Os.38416.1.A1_at	LOC_Os03g50270.1	Os03g0710600	4333878	LOC4333878	-	Q53RJ7	expressed protein	-	osa:4333878	-	-	-	-	-	GO:0016021 [Name: integral component of membrane]	-	822.339	1.6284	0	0	Down			Os.14200.1.S1_at	LOC_Os10g24070.1	Os10g0382300	4348507	LOC4348507	PF10607	Q338W3; Q0IY13	expressed protein	-	osa:4348507	-	-	-	-	-	GO:0009536 [Name: plastid]	-	1511.08	0.6325	0.0003	0	up				Os.53705.1.S1_at
Os.4506.3.S1_x_at	LOC_Os06g02370.1,LOC_Os06g02370.3	Os06g0113900,Os06g0113900	4339909	P0541H01.18-1	-	Q9LWT7; B7ETL1	expressed protein	-	osa:9267527	-	-	-	-	-	GO:0016021 [Name: integral component of membrane]	-	1180.54	1.7312	0	0	Down			Os.35613.1.S1_at	LOC_Os05g12474.1	Os05g0215600	4338114	LOC4338114	PF10184	B7EPF9; Q0DJX6	expressed protein	-	osa:4338114	-	-	-	-	-	-	-	1521.36	1.457	0.0003	0	Down				Os.8545.1.S1_at
Os.4616.1.S1_at	LOC_Os02g48184.1	Os02g0712400	4330500	-	-	Q0DY68	expressed protein	-	osa:4330500	-	-	-	-	-	-	-	204.946	0.3255	0	0	up			Os.14584.1.S1_at	LOC_Os06g36360.4,LOC_Os06g36360.4,LOC_Os06g36360.1,LOC_Os06g36360.1	Os06g0558700,Os06g0558766,Os06g0558700,Os06g0558766	9268632	LOC9268632	PF04926; PF04928; PF01909	Q5G7K1	expressed protein	-	osa:9268632	K14376	osa03015	osa03015 [Pathway Title: mRNA surveillance pathway]	mRNA surveillance pathway	GO:0043631 [Name: RNA polyadenylation]; GO:0031123 [Name: RNA 3'-end processing]	GO:0005634 [Name: nucleus]	GO:0003723 [Name: RNA binding]; GO:0004652 [Name: polynucleotide adenylyltransferase activity]	1471.48	0.6434	0.0002	0	up				Os.9520.1.S1_at
Os.46271.1.S1_at	LOC_Os12g38650.1	Os12g0575200	9271278	LOC9271278	-	Q2QN85	expressed protein	-	osa:9271278	-	-	-	-	-	GO:0005742 [Name: mitochondrial outer membrane translocase complex]; GO:0005739 [Name: mitochondrion]	-	792.681	1.5855	0	0	Down			Os.16257.1.S1_at	LOC_Os01g66190.1,LOC_Os01g66190.2	Os01g0885200,Os01g0885200	4324881	LOC4324881	-	Q8S0R7	expressed protein	-	osa:4324881	-	-	-	-	-	GO:0016021 [Name: integral component of membrane]	-	1487.06	1.3898	0.0002	0	Down				OsAffx.24189.1.S1_at
Os.47740.1.S1_at	LOC_Os04g49530.1	Os04g0584800	4336785	LOC4336785	PF00071	Q7XP63	expressed protein	-	osa:4336785	-	-	-	-	-	-	GO:0005525 [Name: GTP binding]; GO:0003924 [Name: GTPase activity]	144.978	0.2433	0	0	up			Os.17682.1.S1_at	LOC_Os03g61140.1,LOC_Os03g61140.2	Os03g0826700,Os03g0826700	4334642	LOC4334642	PF10294	Q10B95	expressed protein	-	osa:4334642	-	-	-	-	-	-	-	1479.67	0.6289	0.0002	0	up				Os.10099.1.S1_at
Os.47930.1.S1_at	LOC_Os02g07920.1	Os02g0175900	4328475	LOC4328475	PF10253	Q6EUQ4; B8AIL0	expressed protein	-	osa:4328475	K13105	-	-	-	-	-	-	1609.66	1.71	0	0	Down			Os.20611.1.S1_at	LOC_Os07g32230.1,LOC_Os07g32230.2	Os07g0506000,Os07g0506000	4343327	LOC4343327	PF03619	Q8H3H8	domain of unknown function domain containing protein, expressed	-	osa:4343327	-	-	-	-	-	GO:0016021 [Name: integral component of membrane]	-	1486.87	0.6137	0.0002	0	up				Os.10426.1.S1_at
Os.4876.1.S1_at	LOC_Os05g02250.1	Os05g0113400	4337605	LOC4337605	PF00241	Q0DLA3; Q5KQM3	expressed protein	-	osa:4337605	K05765	-	-	-	GO:0030042 [Name: actin filament depolymerization]	GO:0015629 [Name: actin cytoskeleton]	GO:0003779 [Name: actin binding]	722.09	1.597	0	0	Down			Os.23802.1.A1_at	LOC_Os04g39540.1	Os04g0471300	4336124	LOC4336124	-	Q7XQM6	expressed protein	-	osa:4336124	-	-	-	-	-	GO:0016021 [Name: integral component of membrane]	-	1486.33	0.6489	0.0002	0	up				Os.10750.1.S1_at
Os.49159.1.A1_x_at	LOC_Os05g32970.1	Os05g0397300	4338706	LOC4338706	-	Q75HV7	expressed protein	-	osa:4338706	-	-	-	-	-	-	-	365.247	0.395	0	0	up			Os.26362.1.S1_at	LOC_Os01g56140.1	Os01g0767000	4325497	LOC4325497	-	Q8LIX8; Q84VB8	expressed protein	-	osa:4325497	-	-	-	-	GO:0006997 [Name: nucleus organization]	GO:0005634 [Name: nucleus]	-	1498.93	1.569	0.0002	0	Down				Os.11307.1.S1_at
Os.49529.1.S1_at	LOC_Os06g43810.1	Os06g0646100	4341658	LOC4341658	-	Q67W63	expressed protein	-	osa:4341658	-	-	-	-	-	-	-	1163.09	0.4764	0	0	up			Os.4971.1.S1_at	LOC_Os02g10500.1	Os02g0198500	4328631	LOC4328631	-	Q6H735	expressed protein	-	osa:4328631	-	-	-	-	-	GO:0016021 [Name: integral component of membrane]	-	1496.77	1.3569	0.0002	0	Down				Os.11897.1.S1_at
Os.4999.1.S1_at	LOC_Os06g50230.1	Os06g0716100	4342076	LOC4342076	PF00226	Q5Z9P2; Q0D9H0	expressed protein	-	osa:4342076	-	-	-	-	-	GO:0009536 [Name: plastid]	-	1466.33	0.4919	0	0	up			Os.5009.1.S1_at	LOC_Os02g06390.1	Os02g0158600	4328367	LOC4328367	-	Q6ET41	expressed protein	-	osa:4328367	-	-	-	-	-	-	-	1492.48	0.6764	0.0002	0	up				Os.11907.1.S1_at
Os.50831.1.S1_at	LOC_Os02g32580.1	Os02g0527200	4329525	LOC4329525	-	Q6H6Q9	expressed protein	-	osa:4329525	-	-	-	-	-	-	-	195.411	0.2232	0	0	up			Os.5747.1.S1_at	LOC_Os05g45280.1	Os05g0529000	4339401	LOC4339401	PF04367	Q65XC4	protein of unknown function DUF502 domain containing protein, expressed	-	osa:4339401	-	-	-	-	-	GO:0005794 [Name: Golgi apparatus]; GO:0016021 [Name: integral component of membrane]	-	1474.06	0.5946	0.0002	0	up				Os.12115.1.S1_at
Os.51234.1.S1_at	LOC_Os09g31360.1	Os09g0488700	4347433	LOC4347433	-	Q0J0Q1	expressed protein	-	osa:4347433	-	-	-	-	-	-	-	1060.6	0.6741	0	0	up			Os.6641.1.S1_at	LOC_Os11g16320.1	Os11g0264600	4350240	LOC4350240	-	Q0ITE8; A6MZP6; Q53LT9	expressed protein	-	osa:4350240	-	-	-	-	-	GO:0016021 [Name: integral component of membrane]	-	1495.92	1.4438	0.0002	0	Down				Os.12303.1.S1_at
Os.51374.1.S1_at	LOC_Os09g30410.1,LOC_Os09g30410.2	Os09g0481800,Os09g0481800	4347400	LOC4347400	-	Q69QQ8	expressed protein	-	osa:4347400	-	-	-	-	GO:0016226 [Name: iron-sulfur cluster assembly]	GO:0009570 [Name: chloroplast stroma]	GO:0005506 [Name: iron ion binding]; GO:0051536 [Name: iron-sulfur cluster binding]	1231.97	1.5158	0	0	Down			Os.9413.1.S1_at	LOC_Os03g12560.1	Os03g0226700	4332127	LOC4332127	-	Q8H855	expressed protein	-	osa:4332127	-	-	-	-	-	GO:0009507 [Name: chloroplast]	-	1515.34	1.3521	0.0002	0	Down				Os.13987.1.S1_at
Os.51385.1.S1_at	LOC_Os02g46620.1	Os02g0693000	4330386	LOC4330386	-	Q6Z8A1	expressed protein	-	osa:4330386	-	-	-	-	-	-	-	793.838	0.6146	0	0	up			Os.11263.1.A1_at	LOC_Os11g17930.1	Os11g0282300	4350281	LOC4350281	PF07939	Q2QVG6; Q0ITA9	expressed protein	-	osa:4351830	-	-	-	-	-	-	-	1473.81	1.4725	0.0001	0	Down				Os.14153.3.S1_x_at
Os.52226.1.S1_at	LOC_Os07g41630.1	Os07g0607200	4343859	LOC4343859	PF05421	Q69J35	expressed protein	-	osa:4343859	-	-	-	-	-	GO:0016021 [Name: integral component of membrane]	-	1445.47	1.5194	0	0	Down			Os.12264.2.S1_at	LOC_Os03g12670.2	Os03g0227800	4332135	-	-	B7E735; B7E365	expressed protein	-	osa:4332135	-	-	-	-	-	-	-	1417.37	0.6921	0.0001	0	up				Os.14955.1.S1_at
Os.52658.1.S1_at	LOC_Os05g34500.1	Os05g0417600	9268643	LOC9268643	-	Q688K3	expressed protein	-	osa:9268643	-	-	-	-	-	-	-	1333.97	1.2829	0	0	Down			Os.12766.1.S1_at	LOC_Os03g14570.1,LOC_Os03g14570.2	Os03g0249700,Os03g0249700	9272607	LOC9272607	-	Q10P23	expressed protein	-	osa:9272607	-	-	-	-	-	GO:0016021 [Name: integral component of membrane]	-	1415.01	0.6535	0.0001	0	up				Os.15822.1.S1_s_at
Os.53103.1.S1_at	LOC_Os05g32970.1	Os05g0397300	4338706	LOC4338706	-	Q75HV7	expressed protein	-	osa:4338706	-	-	-	-	-	-	-	596.524	0.4817	0	0	up			Os.14200.2.S1_x_at	LOC_Os10g24070.1	Os10g0382300	4348507	LOC4348507	PF10607	B9G5H7; Q0IY13; Q338W3; B8BGK4	expressed protein	-	osa:4348507	-	-	-	-	-	GO:0009536 [Name: plastid]	-	1394.59	0.6096	0.0001	0	up				Os.15853.1.S1_at
Os.53103.1.S1_x_at	LOC_Os05g32970.1	Os05g0397300	4338706	LOC4338706	-	Q75HV7	expressed protein	-	osa:4338706	-	-	-	-	-	-	-	535.516	0.451	0	0	up			Os.16913.1.S1_at	LOC_Os04g13470.1	Os04g0212200	9267478	LOC9267478	PF07928	C7J0X7	expressed protein	-	osa:9267478	K17600	-	-	-	GO:0042147 [Name: retrograde transport, endosome to Golgi]	GO:0000938 [Name: GARP complex]; GO:0005829 [Name: cytosol]	-	1456.33	1.3985	0.0001	0	Down				Os.16999.1.A1_at
Os.53275.1.S1_at	LOC_Os05g08420.1,LOC_Os05g08420.2	Os05g0176700,Os05g0176700	4337962	LOC4337962	-	Q6AT22; A6N186	expressed protein	-	osa:4337962	-	-	-	-	-	GO:0009536 [Name: plastid]	-	520.929	0.3562	0	0	up			Os.18430.1.S1_at	LOC_Os04g35380.2,LOC_Os04g35380.4,LOC_Os04g35380.1,LOC_Os04g35380.5	Os04g0433200,Os04g0433200,Os04g0433200,Os04g0433200	9272266	LOC9272266	PF07264	C7J0Y7	expressed protein	-	osa:9272266	-	-	-	-	-	GO:0016021 [Name: integral component of membrane]	-	1400.34	0.6093	0.0001	0	up				Os.20980.1.S1_at
Os.53802.1.S1_at	LOC_Os04g40670.1	Os04g0482900	4336197	LOC4336197	-	Q7XUP2	expressed protein	-	osa:4336197	-	-	-	-	-	GO:0009536 [Name: plastid]	-	24.8469	3.2738	0	0	Down			Os.18634.1.S1_at	LOC_Os04g44560.1	Os04g0527800	4336463	LOC4336463	-	Q7XKI6	expressed protein	-	osa:4336463	-	-	-	-	-	GO:0009535 [Name: chloroplast thylakoid membrane]; GO:0016021 [Name: integral component of membrane]; GO:0009941 [Name: chloroplast envelope]	-	1449.98	1.248	0.0001	0	Down				Os.27218.1.A1_at
Os.5412.1.S1_at	LOC_Os03g01014.1	Os03g0100030	107275868; 107279817	LOC107275868; LOC107279817	PF02517	A3AD50	expressed protein	-	osa:107275868; osa:107279817	-	-	-	-	-	GO:0016021 [Name: integral component of membrane]	-	460.868	2.4608	0	0	Down			Os.23598.1.S1_at	LOC_Os01g21410.1	Os01g0316500	4327262	LOC4327262	-	Q656G9	expressed protein	-	osa:4327262	-	-	-	-	-	-	-	1445.71	0.6089	0.0001	0	up				Os.34167.2.S1_at
Os.54564.1.S1_at	LOC_Os03g12930.1,LOC_Os03g12930.2	Os03g0231900,Os03g0231900	4332154	LOC4332154	-	Q10PJ9	expressed protein	-	osa:4332154	-	-	-	-	GO:0010100 [Name: negative regulation of photomorphogenesis]; GO:0009787 [Name: regulation of abscisic acid-activated signaling pathway]	GO:0009536 [Name: plastid]	-	1311.97	1.5068	0	0	Down			Os.4783.1.S1_a_at	LOC_Os02g31220.1,LOC_Os02g31220.2	Os02g0517300,Os02g0517300	4329480	LOC4329480	-	Q64M88	expressed protein	-	osa:4329480	K12617	osa03018	osa03018 [Pathway Title: RNA degradation]	RNA degradation	GO:0033962 [Name: cytoplasmic mRNA processing body assembly]; GO:0000290 [Name: deadenylation-dependent decapping of nuclear-transcribed mRNA]	GO:0000932 [Name: P-body]	GO:0003723 [Name: RNA binding]	1446.18	0.566	0.0001	0	up				Os.34167.3.S1_x_at
Os.5458.1.A1_at	LOC_Os01g70470.1	Os01g0930200	4326943	LOC4326943	-	Q5JK33	expressed protein	-	osa:4326943	-	-	-	-	-	-	-	678.858	0.4873	0	0	up			Os.49235.2.S1_x_at	LOC_Os02g44540.1,LOC_Os02g44540.2,LOC_Os02g44540.3,LOC_Os02g44540.4,LOC_Os02g44540.5,LOC_Os02g44540.6	Os02g0664700,Os02g0664700,Os02g0664700,Os02g0664700,Os02g0664700,Os02g0664700	9267931	LOC9267931	-	B7EAY8; Q6ESI2	expressed protein	-	osa:9267931	-	-	-	-	-	-	-	1460.33	1.4772	0.0001	0	Down				Os.34789.1.S1_at
Os.5577.2.S1_a_at	LOC_Os04g59570.1,LOC_Os04g59570.2	Os04g0692200,Os04g0692200	4337512	LOC4337512	PF00171; PF12527	Q53NG8; A6MZG6; B7E442; Q0J8Q7	expressed protein	-	osa:4349966; osa:4337512	K00128	osa00340; osa01110; osa01130; osa00410; osa00053; osa00071; osa00280; osa00310; osa00561; osa00380; osa00620; osa00010; osa00903; osa01100; osa00040; osa00330	osa00071 [Pathway Title: Fatty acid degradation]; osa00340 [Pathway Title: Histidine metabolism]; osa01110 [Pathway Title: Biosynthesis of secondary metabolites]; osa00410 [Pathway Title: beta-Alanine metabolism]; osa00561 [Pathway Title: Glycerolipid metabolism]; osa00010 [Pathway Title: Glycolysis / Gluconeogenesis]; osa00040 [Pathway Title: Pentose and glucuronate interconversions]; osa00280 […	-	GO:0006081 [Name: cellular aldehyde metabolic process]	GO:0016021 [Name: integral component of membrane]	GO:0004028 [Name: 3-chloroallyl aldehyde dehydrogenase activity]; GO:0016620 [Name: oxidoreductase activity, acting on the aldehyde or oxo group of donors, NAD or NADP as acceptor]	383.158	2.0344	0	0	Down			Os.51478.1.S1_at	LOC_Os12g17830.1,LOC_Os12g17830.2	Os12g0276100,Os12g0276100	4351971	LOC4351971	-	Q2QU14	expressed protein	-	osa:4351971	-	-	-	-	-	GO:0016021 [Name: integral component of membrane]	-	1452.27	1.4965	0.0001	0	Down				Os.34819.2.S1_s_at
Os.5577.2.S1_at	LOC_Os04g59570.1,LOC_Os04g59570.2	Os04g0692200,Os04g0692200	4337512	LOC4337512	PF12527	Q0J8Q7; B7E442	expressed protein	-	osa:4337512	-	-	-	-	-	GO:0009536 [Name: plastid]	-	1436.47	1.2382	0	0	Down			Os.5427.1.S1_at	LOC_Os02g43040.1	Os02g0644500	9271984	LOC9271984	PF10033	Q6H657	expressed protein	-	osa:9271984	K08331	osa04140	osa04140 [Pathway Title: Regulation of autophagy]	Regulation of autophagy	GO:0034727 [Name: piecemeal microautophagy of nucleus]; GO:0000422 [Name: mitophagy]; GO:0032147 [Name: activation of protein kinase activity]; GO:0034497 [Name: protein localization to pre-autophagosomal structure]; GO:0016236 [Name: macroautophagy]; GO:0000423 [Name: macromitophagy]	GO:0000407 [Name: pre-autophagosomal structure]; GO:0019898 [Name: extrinsic component of membrane]; GO:0005829 [Name: cytosol]; GO:1990316 [Name: ATG1/ULK1 kinase complex]	GO:0019887 [Name: protein kinase regulator activity]; GO:0019901 [Name: protein kinase binding]	1460.17	0.6371	0.0001	0	up				Os.35273.1.S1_at
Os.56231.1.S1_at	LOC_Os03g48950.1,LOC_Os03g48950.2	Os03g0696000,Os03g0696000	4333805	LOC4333805	PF03168	Q10EQ8	expressed protein	-	osa:4333805	-	-	-	-	GO:0009269 [Name: response to desiccation]	GO:0016021 [Name: integral component of membrane]; GO:0005886 [Name: plasma membrane]	-	1273.44	1.7013	0	0	Down			Os.54384.1.S1_at	LOC_Os02g42550.1	Os02g0638000	4330093	LOC4330093	-	Q6H5V6; A6N055	expressed protein	-	osa:4330093	-	-	-	-	-	-	-	1459.08	1.4423	0.0001	0	Down				Os.37955.1.S2_at
Os.5725.1.S1_at	LOC_Os12g07210.1	Os12g0169600	9268960	LOC9268960	PF00274	Q53P93; C7JA37; Q40677; O22486	expressed protein	-	osa:4349897	K01623	osa01200; osa00030; osa01130; osa00710; osa01110; osa00051; osa01230; osa00010; osa01100	osa00010 [Pathway Title: Glycolysis / Gluconeogenesis]; osa00710 [Pathway Title: Carbon fixation in photosynthetic organisms]; osa01200 [Pathway Title: Carbon metabolism]; osa00051 [Pathway Title: Fructose and mannose metabolism]; osa01230 [Pathway Title: Biosynthesis of amino acids]; osa01130 [Pathway Title: Biosynthesis of antibiotics]; osa01110 [Pathway Title: Biosynthesis of secondary metabol…	-	GO:0006096 [Name: glycolytic process]; GO:0006094 [Name: gluconeogenesis]	GO:0016021 [Name: integral component of membrane]; GO:0010287 [Name: plastoglobule]; GO:0005737 [Name: cytoplasm]	GO:0004332 [Name: fructose-bisphosphate aldolase activity]	333.051	1.4444	0	0	Down			Os.5925.1.S1_at	LOC_Os04g04320.1,LOC_Os04g04320.2	Os04g0132300,Os04g0132300	4335002	LOC4335002	PF05282	Q0JF78	expressed protein	-	osa:4335002	K13205	-	-	-	-	-	-	1400.26	0.6903	0.0001	0	up				Os.39063.1.A1_s_at
Os.5901.1.S1_at	LOC_Os12g29550.1	Os12g0479900	4352213	LOC4352213	PF12576	Q2QQX3	expressed protein	-	osa:4352213	-	-	-	-	-	GO:0016021 [Name: integral component of membrane]	-	1276.26	0.6838	0	0	up			Os.6331.1.S1_at	LOC_Os04g44800.1	Os04g0530300	4336481	LOC4336481	-	Q7X8Y1	expressed protein	-	osa:4336481	-	-	-	-	-	-	-	1467.45	0.6307	0.0001	0	up				Os.44707.1.S1_at
Os.6044.1.S1_at	LOC_Os04g41500.1,LOC_Os04g41500.2	Os04g0492400,Os04g0492400	4336255	LOC4336255	PF10294	Q7X8M4	expressed protein	-	osa:4336255	-	-	-	-	-	-	-	274.394	0.3073	0	0	up			Os.7532.1.S1_at	LOC_Os02g20380.1,LOC_Os02g20380.1,LOC_Os02g20380.2,LOC_Os02g20380.2,LOC_Os02g20380.3,LOC_Os02g20380.3	Os02g0306550,Os02g0306600,Os02g0306550,Os02g0306600,Os02g0306550,Os02g0306600	-	-	-	-	expressed protein	-	-	-	-	-	-	-	-	-	1451.92	0.6952	0.0001	0	up				Os.45934.1.S1_at
Os.6284.1.S1_at	LOC_Os03g04710.1,LOC_Os03g04710.2	Os03g0140700,Os03g0140700	4331573	LOC4331573	-	Q10RZ6	expressed protein	-	osa:4331573	-	-	-	-	-	-	-	1255.85	0.6754	0	0	up			Os.7992.1.S1_a_at	LOC_Os01g10400.2,LOC_Os01g10400.1	Os01g0200700,Os01g0200700	4327065	MT3A	-	A1YTM8; A2WLS0; A6N1P0; B0FFN3	expressed protein	-	osa:4327065	-	-	-	-	GO:0006878 [Name: cellular copper ion homeostasis]	GO:0005623 [Name: cell]	GO:0005507 [Name: copper ion binding]; GO:0008270 [Name: zinc ion binding]; GO:0046872 [Name: metal ion binding]	1426.46	0.6932	0.0001	0	up				Os.46691.1.A1_x_at
Os.6501.1.A1_at	LOC_Os08g43180.1	Os08g0545000	4346216	LOC4346216	-	Q6ZBH4	expressed protein	-	osa:4346216	-	-	-	-	-	-	GO:0003824 [Name: catalytic activity]	1469.72	0.6908	0	0	up			Os.8137.1.S1_at	LOC_Os05g40410.1	Os05g0482600	4339132	LOC4339132	-	Q0DH92	expressed protein	-	osa:4339132	-	-	-	-	-	GO:0009536 [Name: plastid]	-	1457.69	1.1888	0.0001	0	Down				Os.4918.1.S1_at
Os.6973.1.S1_at	LOC_Os03g04440.1,LOC_Os03g04440.2	Os03g0137300,Os03g0137300	4331549	LOC4331549	PF11833	Q0DVC4	expressed protein	-	osa:4331549	-	-	-	-	-	GO:0016021 [Name: integral component of membrane]	-	1108.69	1.4072	0	0	Down			Os.9783.1.S1_at	LOC_Os03g15033.1	Os03g0255200	4332290	LOC4332290	PF11833	Q0DTD2	expressed protein	-	osa:4332290	-	-	-	-	-	GO:0016021 [Name: integral component of membrane]	-	1426.72	1.2492	0.0001	0	Down				Os.50831.1.S1_at
Os.7277.1.S1_s_at	LOC_Os03g44670.1	Os03g0649000	4333583	LOC4333583	PF10358	Q0DPZ2	expressed protein	-	osa:4333583	-	-	-	-	-	-	-	1258.06	0.8452	0	0	up			OsAffx.14661.1.S1_s_at	LOC_Os05g12474.1	Os05g0215600	4338114	LOC4338114	PF10184	B7EPF9; Q0DJX6	expressed protein	-	osa:4338114	-	-	-	-	-	-	-	1453.55	1.4515	0.0001	0	Down				Os.5245.1.S1_at
Os.7396.2.S1_a_at	LOC_Os02g47580.1	Os02g0704600	4330454	LOC4330454	-	Q6YVI2	expressed protein	-	osa:4330454	-	-	-	-	-	GO:0016021 [Name: integral component of membrane]	-	1252.61	0.7154	0	0	up			Os.10001.1.S1_at	LOC_Os02g22060.1	Os02g0326000	4329186	LOC4329186	PF09991	Q6Z868	expressed protein	-	osa:4329186	-	-	-	-	-	GO:0016021 [Name: integral component of membrane]	-	875.668	1.8506	0	0	Down				Os.5525.1.S1_at
Os.7744.1.S1_at	LOC_Os06g19390.1	Os06g0297700	4340809	LOC4340809	PF01594	Q5Z6I5	expressed protein	-	osa:4340809	-	-	-	-	-	GO:0016021 [Name: integral component of membrane]	-	994.366	0.6011	0	0	up			Os.10051.1.S1_at	LOC_Os09g36990.1	Os09g0541700	4347733	LOC4347733	-	Q7XJ15	expressed protein	-	osa:4347733	-	-	-	-	-	GO:0009536 [Name: plastid]	-	1084.35	0.5507	0	0	up				Os.55283.1.S1_at
Os.799.1.S1_at	LOC_Os01g01390.1,LOC_Os01g01390.2,LOC_Os01g01390.3,LOC_Os01g01390.4,LOC_Os01g01390.5	Os01g0103800,Os01g0103800,Os01g0103800,Os01g0103800,Os01g0103800	4326451	LOC4326451	-	Q658D7	expressed protein	-	osa:4326451	-	-	-	-	-	-	-	1037.94	1.7199	0	0	Down			Os.10096.1.S1_at	LOC_Os01g05830.1	Os01g0151600	4324527	LOC4324527	-	Q5ZEJ4	expressed protein	-	osa:4324527	-	-	-	-	-	-	-	196.132	0.2389	0	0	up				Os.5530.1.S1_at
Os.8111.1.S1_at	LOC_Os03g08970.1	Os03g0189100	4331891	LOC4331891	PF05340	Q8H7N4	expressed protein	-	osa:4331891	-	-	-	-	-	-	-	929.425	0.6104	0	0	up			Os.10123.2.S1_x_at	LOC_Os01g58114.1,LOC_Os01g58114.1,LOC_Os01g58114.2	Os01g0793500,Os01g0793600,Os01g0793500	4324130	LOC4324130	-	Q5ZBU1	expressed protein	-	osa:4324130	-	-	-	-	-	-	-	1284.25	0.582	0	0	up				Os.5925.1.S1_at
Os.8314.1.S1_at	LOC_Os04g59330.1	Os04g0689500	4337491	LOC4337491	-	Q0J8S7; Q7XST6	expressed protein	-	osa:4337491	-	-	-	-	GO:0006468 [Name: protein phosphorylation]	GO:0016021 [Name: integral component of membrane]	GO:0005524 [Name: ATP binding]	914.277	0.8293	0	0	up			Os.10214.1.S1_at	LOC_Os01g69870.1	Os01g0923000	4327248	LOC4327248	-	Q8RYH1	expressed protein	-	osa:4327248	-	-	-	-	-	GO:0016021 [Name: integral component of membrane]	-	1294	0.6874	0	0	up				Os.7992.1.S1_a_at
Os.8439.1.S1_a_at	LOC_Os03g48626.1,LOC_Os03g48626.2	Os03g0692700,Os03g0692700	9272634	LOC9272634	PF04398	A2XKW5; C7J023; Q10EV9; Q851I6	expressed protein	-	osa:9272634	-	-	-	-	-	GO:0005773 [Name: vacuole]	-	521.94	2.3722	0	0	Down			Os.10247.1.S1_a_at	LOC_Os07g11290.1	Os07g0213400	4342718	LOC4342718	-	B8B8F1; Q7XIH0; B9FW62	expressed protein	-	osa:4342718	-	-	-	-	-	-	-	1378.74	0.5727	0	0	up				Os.8434.1.S1_at
Os.8439.1.S1_at	LOC_Os03g48626.2	Os03g0692700	107278586; 9272634	LOC107278586; LOC9272634	PF04398	Q10EV9	expressed protein	-	osa:9272634	-	-	-	-	-	GO:0005773 [Name: vacuole]	-	292.606	2.5828	0	0	Down			Os.10672.1.S1_at	LOC_Os03g10080.1,LOC_Os03g10080.3,LOC_Os03g10080.4,LOC_Os03g10080.4,LOC_Os03g10080.5,LOC_Os03g10080.5	Os03g0197000,Os03g0197000,Os03g0197000,Os03g0197050,Os03g0197000,Os03g0197050	4331944	LOC4331944	-	Q10QG8	expressed protein	-	osa:4331944	K11778	osa01110; osa00900	osa00900 [Pathway Title: Terpenoid backbone biosynthesis]; osa01110 [Pathway Title: Biosynthesis of secondary metabolites]	Terpenoid backbone biosynthesis; Biosynthesis of secondary metabolites	GO:0019408 [Name: dolichol biosynthetic process]; GO:0001525 [Name: angiogenesis]	GO:0016021 [Name: integral component of membrane]; GO:1904423 [Name: dehydrodolichyl diphosphate synthase complex]	GO:0016765 [Name: transferase activity, transferring alkyl or aryl (other than methyl) groups]	862.99	0.661	0	0	up				Os.8434.2.S1_x_at
Os.8465.1.S1_a_at	LOC_Os12g37530.1,LOC_Os12g37530.2,LOC_Os12g37530.3	Os12g0562100,Os12g0562100,Os12g0562100	4352522	LOC4352522	PF06963	B8BMI3; Q2QNK7	expressed protein	-	osa:4352522	-	-	-	-	-	GO:0016021 [Name: integral component of membrane]; GO:0009941 [Name: chloroplast envelope]	GO:0005381 [Name: iron ion transmembrane transporter activity]	747.793	1.8361	0	0	Down			Os.11042.1.S1_at	LOC_Os05g37930.1,LOC_Os05g37930.2,LOC_Os05g37930.3	Os05g0453300,Os05g0453300,Os05g0453300	4338970	LOC4338970	-	Q6I645	expressed protein	-	osa:4338970	-	-	-	-	-	-	-	569.363	2.0194	0	0	Down				Os.8824.1.S1_at
Os.8786.1.S1_a_at	LOC_Os05g40270.1,LOC_Os05g40270.12,LOC_Os05g40270.2,LOC_Os05g40270.3,LOC_Os05g40270.4,LOC_Os05g40270.5,LOC_Os05g40270.6,LOC_Os05g40270.7,LOC_Os05g40270.8,LOC_Os05g40270.9	Os05g0481100,Os05g0481100,Os05g0481100,Os05g0481100,Os05g0481100,Os05g0481100,Os05g0481100,Os05g0481100,Os05g0481100,Os05g0481100	9272054	LOC9272054	PF13855; PF08263; PF00069	B7F5L0; B9FJT1; B7EP37; Q5KQI5; B8AZB0	expressed protein	-	osa:9272054	-	-	-	-	-	GO:0016021 [Name: integral component of membrane]	GO:0005524 [Name: ATP binding]; GO:0004674 [Name: protein serine/threonine kinase activity]; GO:0004672 [Name: protein kinase activity]	936.127	1.2301	0	0	Down			Os.11184.1.S1_at	LOC_Os04g31690.1	Os04g0386500	4335654	LOC4335654	PF04359	Q0JDQ2	expressed protein	-	osa:4335654	-	-	-	-	-	-	-	1270.89	0.575	0	0	up				Os.9072.1.S1_at
Os.9077.1.S1_at	LOC_Os10g41940.1	Os10g0569000	4349444	LOC4349444	-	Q8S7Q1	expressed protein	-	osa:4349444	-	-	-	-	-	GO:0016021 [Name: integral component of membrane]	-	1027.68	1.3885	0	0	Down			Os.11601.1.S1_at	LOC_Os10g22460.1	Os10g0370000	4348468	LOC4348468	PF07228	Q339D2	expressed protein	-	osa:4348468	-	-	-	-	-	GO:0009536 [Name: plastid]	GO:0046872 [Name: metal ion binding]; GO:0004721 [Name: phosphoprotein phosphatase activity]	870.853	1.7915	0	0	Down				Os.9093.1.S1_at
Os.9283.1.S1_at	LOC_Os02g33070.1	Os02g0533800	4329559	LOC4329559	-	Q6EPY3	expressed protein	-	osa:4329559	-	-	-	-	-	GO:0005747 [Name: mitochondrial respiratory chain complex I]	-	1437.91	0.7762	0	0	up			Os.11704.1.S1_at	LOC_Os03g58090.1	Os03g0795100	4334411	LOC4334411	-	Q6F381	expressed protein	-	osa:4334411	-	-	-	-	GO:0009642 [Name: response to light intensity]	-	-	446.263	2.5795	0	0	Down				Os.9498.1.S1_at
Os.9316.1.S1_at	LOC_Os06g47220.1	Os06g0686600	4341885	LOC4341885	PF12023	Q653H1	expressed protein	-	osa:4341885	-	-	-	-	-	-	-	482.437	2.6941	0	0	Down			Os.11717.1.S1_a_at	LOC_Os01g50450.1	Os01g0700000	4326922	LOC4326922	-	Q5N8I8	expressed protein	-	osa:4326922	-	-	-	-	-	-	-	372.403	0.3851	0	0	up				Os.9684.1.S1_at
Os.9398.1.S1_a_at	LOC_Os07g23520.1,LOC_Os07g23520.2	Os07g0418000,Os07g0418000	4343029	LOC4343029	-	B8ATY0; Q8LHV5; Q7F0Q5	expressed protein	-	osa:4343029	-	-	-	-	GO:0035493 [Name: SNARE complex assembly]	GO:0009570 [Name: chloroplast stroma]	GO:0000149 [Name: SNARE binding]	1388.89	0.7035	0	0	up			Os.11717.1.S1_at	LOC_Os01g50450.1	Os01g0700000	4326922	LOC4326922	-	Q5N8I8	expressed protein	-	osa:4326922	-	-	-	-	-	-	-	636.286	0.4787	0	0	up				OsAffx.11368.1.S1_at
Os.9783.1.S1_at	LOC_Os03g15033.1	Os03g0255200	4332290	LOC4332290	PF11833	Q0DTD2	expressed protein	-	osa:4332290	-	-	-	-	-	GO:0016021 [Name: integral component of membrane]	-	1138.42	1.6234	0	0	Down			Os.11783.1.S1_at	LOC_Os08g44650.1	Os08g0560600	4346324	LOC4346324	PF09350	Q6YYX4	expressed protein	-	osa:4346324	K19373	-	-	-	-	-	-	767.391	0.5602	0	0	up				OsAffx.11943.1.S1_s_at
Os.9965.1.S1_at	LOC_Os06g43550.1,LOC_Os06g43550.2	Os06g0642900,Os06g0642900	4341635	LOC4341635	PF02845	Q67WV6	expressed protein	-	osa:4341635	-	-	-	-	-	GO:0009536 [Name: plastid]	-	1175.92	0.6875	0	0	up			Os.11916.1.S1_at	LOC_Os11g11980.1	Os11g0227000	4350119	LOC4350119	-	Q0ITQ9	expressed protein	-	osa:4350119	-	-	-	-	-	-	-	1399.17	1.5048	0	0	Down				OsAffx.12022.1.S1_s_at
OsAffx.14474.1.S1_at	LOC_Os04g58890.1	Os04g0685700	9267051	LOC9267051	-	C7J155	expressed protein	-	osa:9267051	-	-	-	-	-	-	-	119.033	0.3472	0	0	up			Os.11999.1.S1_at	LOC_Os05g02010.1,LOC_Os05g02010.2,LOC_Os05g02010.3,LOC_Os05g02010.4	Os05g0110800,Os05g0110800,Os05g0110800,Os05g0110800	4337592	LOC4337592	-	Q65XV9	expressed protein	-	osa:4337592	-	-	-	-	GO:0009773 [Name: photosynthetic electron transport in photosystem I]	GO:0009535 [Name: chloroplast thylakoid membrane]	GO:0016730 [Name: oxidoreductase activity, acting on iron-sulfur proteins as donors]	1103.14	0.6212	0	0	up				OsAffx.15770.1.S1_at
OsAffx.16825.1.S1_s_at	LOC_Os08g04430.1	Os08g0138900	4344630	LOC4344630	-	Q6ZKI4	expressed protein	-	osa:4344630	-	-	-	-	-	-	-	806.65	1.5069	0	0	Down			Os.12044.1.S1_at	LOC_Os02g03330.1	Os02g0125700	4328151	LOC4328151	-	Q0E4C7; B7EIQ8	expressed protein	-	osa:4328151	-	-	-	-	-	GO:0009535 [Name: chloroplast thylakoid membrane]	-	641.686	1.8857	0	0	Down				OsAffx.27605.1.S1_s_at
OsAffx.18657.3.S1_s_at	LOC_Os11g03920.1	Os11g0133900	4349696	LOC4349696	PF13233	Q0IUU7	expressed protein	-	osa:4349696	-	-	-	-	-	-	-	1178.14	1.7523	0	0	Down			Os.12176.1.S1_at	LOC_Os03g07590.1	Os03g0172100	4331781	LOC4331781	-	Q10R43; P93427	expressed protein	-	osa:4331781	-	-	-	-	-	-	-	325.232	2.2028	0	0	Down				OsAffx.4518.1.S1_s_at
OsAffx.1869.1.S1_at	LOC_Os12g34148.1	None	6450170	orf224	PF02326	Q8HCP9; Q35317	expressed protein	-	osa:6450170	-	-	-	-	-	GO:0005739 [Name: mitochondrion]; GO:0016021 [Name: integral component of membrane]	-	1433.97	0.5329	0	0	up			Os.12279.1.S1_a_at	LOC_Os01g72009.1	Os01g0948600	-	-	-	-	expressed protein	-	-	-	-	-	-	-	-	-	1169.88	0.547	0	0	up				Os.11766.1.S1_at
OsAffx.23593.1.S1_s_at	LOC_Os01g40070.1,LOC_Os02g45610.1	Os01g0582600,None	4324200	LOC4324200	PF13359	Q0JLQ0	expressed protein	-	osa:4324200	-	-	-	-	-	-	-	116.284	0.1862	0	0	up			Os.12279.2.S1_a_at	LOC_Os01g72009.1	Os01g0948600	-	-	PF12734	-	expressed protein	-	-	-	-	-	-	-	-	-	515.338	0.3808	0	0	up				OsAffx.27508.78.S1_s_at
OsAffx.24076.1.S1_s_at	LOC_Os02g03010.1	Os02g0122500	9271151	LOC9271151	PF13301	-	expressed protein	-	osa:9271151	-	-	-	-	-	-	-	1187.28	1.501	0	0	Down			Os.12342.1.S1_at	LOC_Os12g04204.1,LOC_Os12g04204.2,LOC_Os12g04204.5,LOC_Os12g04204.4	Os12g0136500,Os12g0136500,Os12g0136500,Os12g0136500	-	-	-	-	expressed protein	-	-	-	-	-	-	-	-	-	421.193	0.3803	0	0	up				Os.30681.1.S1_at
OsAffx.25073.1.S1_x_at	LOC_Os03g12700.1,LOC_Os03g12700.2	Os03g0228200,Os03g0228200	4332137	LOC4332137	-	Q10PM9	expressed protein	-	osa:4332137	-	-	-	-	GO:0006520 [Name: cellular amino acid metabolic process]	GO:0016021 [Name: integral component of membrane]	GO:0004617 [Name: phosphoglycerate dehydrogenase activity]	646.703	2.0995	0	0	Down			Os.12342.1.S2_at	LOC_Os12g04204.1,LOC_Os12g04204.2,LOC_Os12g04204.3,LOC_Os12g04204.4,LOC_Os12g04204.5	Os12g0136500,Os12g0136500,Os12g0136500,Os12g0136500,Os12g0136500	-	-	PF02330	-	expressed protein	-	-	-	-	-	-	-	-	-	753.474	0.4858	0	0	up				Os.38258.2.S1_at
OsAffx.26462.1.S1_at	LOC_Os04g44590.2	Os04g0528100	4336466	LOC4336466	-	Q7XKI3	expressed protein	-	osa:4336466	-	-	-	-	-	GO:0016020 [Name: membrane]; GO:0009536 [Name: plastid]	-	1504.71	1.1999	0	0	Down			Os.12405.1.S1_at	LOC_Os08g44460.1,LOC_Os08g44460.2,LOC_Os08g44460.3	Os08g0558900,Os08g0558900,Os08g0558900	4346312	LOC4346312	PF04568	A6MZA0; Q6YZI5; Q9XIV2	expressed protein	-	osa:4346312	-	-	-	-	GO:0032780 [Name: negative regulation of ATPase activity]	GO:0005739 [Name: mitochondrion]	GO:0042030 [Name: ATPase inhibitor activity]	881.961	1.8843	0	0	Down				Os.52438.1.S1_at
OsAffx.27508.82.S1_x_at	LOC_Os02g32469.1,LOC_Os02g32469.2	Os02g0525600,Os02g0525600	4329516	LOC4329516	-	Q0E0T0	expressed protein	-	osa:4329516	-	-	-	-	-	-	-	639.988	1.7001	0	0	Down			Os.12757.1.S1_a_at	LOC_Os04g20280.1,LOC_Os04g20280.2,LOC_Os01g05694.1	Os04g0271200,Os04g0271200,Os01g0150200	4324518; 4335343	LOC4335343	PF04387	Q7XSZ4; Q5ZEJ0	expressed protein	-	osa:4335343	K10703	osa01040; osa01110; osa01212; osa00062	osa01040 [Pathway Title: Biosynthesis of unsaturated fatty acids]; osa01110 [Pathway Title: Biosynthesis of secondary metabolites]; osa00062 [Pathway Title: Fatty acid elongation]; osa01212 [Pathway Title: Fatty acid metabolism]	Fatty acid metabolism; Fatty acid elongation; Biosynthesis of unsaturated fatty acids; Biosynthesis of secondary metabolites	GO:0006633 [Name: fatty acid biosynthetic process]; GO:0007275 [Name: multicellular organism development]	GO:0005789 [Name: endoplasmic reticulum membrane]; GO:0016021 [Name: integral component of membrane]	GO:0102344 [Name: 3-hydroxy-behenoyl-CoA dehydratase activity]; GO:0102345 [Name: 3-hydroxy-lignoceroyl-CoA dehydratase activity]	1256.4	1.4491	0	0	Down				Os.6931.1.S1_at
OsAffx.4518.1.S1_s_at	LOC_Os05g34680.2,LOC_Os05g34680.1	Os05g0419600,Os05g0419600	4338819	LOC4338819	-	Q60DW0	expressed protein	-	osa:4338819	-	-	-	-	-	GO:0016021 [Name: integral component of membrane]	-	655.557	0.5312	0	0	up			Os.12778.1.S2_at	LOC_Os07g42714.1	Os07g0619200	4343924	LOC4343924	PF13202	Q0D4L7	expressed protein	-	osa:4343924	-	-	-	-	-	-	GO:0005509 [Name: calcium ion binding]	920.622	1.8131	0	0	Down				Os.9752.2.S1_x_at
Os.36566.1.S1_s_at	LOC_Os01g13660.2	Os01g0238200	4326356	LOC4326356	-	Q9FTU6	expressed protein	-	osa:4326356	-	-	-	-	-	GO:0016021 [Name: integral component of membrane]	-	1974.09	0.8619	0.0068	0.0015	up			Os.13497.1.S1_at	LOC_Os03g13810.3	Os03g0241300	9271214	LOC9271214	-	Q10PA2	expressed protein	-	osa:9271214	-	-	-	-	-	-	-	918.306	0.4594	0	0	up				Os.9752.3.S1_x_at
OsAffx.13628.1.S1_at	LOC_Os04g02830.1	Os04g0118500	9266162	LOC9266162	PF00639	C7J0T7	expressed protein	-	osa:9266162	-	-	-	-	-	-	GO:0003755 [Name: peptidyl-prolyl cis-trans isomerase activity]	1985.77	1.2688	0.0067	0.0016	Down			Os.13497.1.S2_at	LOC_Os03g13810.1,LOC_Os03g13810.2,LOC_Os03g13810.3	Os03g0241300,Os03g0241300,Os03g0241300	9271214	LOC9271214	-	Q10PA2	expressed protein	-	osa:9271214	-	-	-	-	-	-	-	804.798	0.4413	0	0	up				Os.20354.1.S1_at
OsAffx.13628.1.S1_s_at	LOC_Os04g02830.1	Os04g0118500	9266162	LOC9266162	PF00639	C7J0T7	expressed protein	-	osa:9266162	-	-	-	-	-	-	GO:0003755 [Name: peptidyl-prolyl cis-trans isomerase activity]	1883.73	1.303	0.0021	0.0005	Down			Os.14157.1.S1_at	LOC_Os08g15500.1	Os08g0254900	4345098	LOC4345098	PF10615	Q0J6W9	expressed protein	-	osa:4345098	-	-	-	-	GO:0070455 [Name: positive regulation of heme biosynthetic process]; GO:0009791 [Name: post-embryonic development]; GO:0033014 [Name: tetrapyrrole biosynthetic process]; GO:0009767 [Name: photosynthetic electron transport chain]	GO:0009570 [Name: chloroplast stroma]; GO:0009534 [Name: chloroplast thylakoid]	GO:0043495 [Name: protein anchor]; GO:0048037 [Name: cofactor binding]	1109.37	1.4494	0	0	Down				Os.3388.2.S1_a_at
Os.11717.1.S1_at	LOC_Os01g50450.1	Os01g0700000	4326922	LOC4326922	-	Q5N8I8	expressed protein	-	osa:4326922	-	-	-	-	-	-	-	1867.43	1.6739	0.0018	0.0004	Down			Os.14288.1.S1_at	LOC_Os05g24000.1,LOC_Os05g24000.2	Os05g0305700,Os05g0305700	4338365	LOC4338365	PF12579	Q0DJA9	expressed protein	-	osa:4338365	-	-	-	-	-	-	-	1377.18	0.591	0	0	up				Os.14813.1.S1_at
Os.36566.3.S1_x_at	LOC_Os01g13660.1,LOC_Os01g13660.2	Os01g0238200,Os01g0238200	4326356	LOC4326356	-	Q9FTU6; A2WML0	expressed protein	-	osa:4326356	-	-	-	-	-	GO:0016021 [Name: integral component of membrane]	-	1831.96	0.8349	0.0014	0.0003	up			Os.14554.1.S1_at	LOC_Os09g27860.1	Os09g0451800	4347228	LOC4347228	PF07800	Q67UF1	expressed protein	-	osa:4347228	-	-	-	-	-	-	-	1234.18	0.6267	0	0	up				Os.18097.1.S1_at
Os.48138.1.S1_at	LOC_Os03g31490.1	Os03g0428800	4333169	LOC4333169	-	Q0DR06	expressed protein	-	osa:4333169	-	-	-	-	-	GO:0009535 [Name: chloroplast thylakoid membrane]; GO:0016021 [Name: integral component of membrane]	-	1830.69	1.2112	0.0011	0.0002	Down			Os.14691.1.S1_at	LOC_Os05g51540.1	Os05g0593200	4339801	LOC4339801	-	Q0DFF8	expressed protein	-	osa:4339801	-	-	-	-	-	GO:0016021 [Name: integral component of membrane]	-	1037.86	1.7059	0	0	Down				Os.18519.1.S1_at
Os.11717.1.S1_a_at	LOC_Os01g50450.1	Os01g0700000	4326922	LOC4326922	-	Q5N8I8	expressed protein	-	osa:4326922	-	-	-	-	-	-	-	1742.64	1.7886	0.0003	0.0001	Down			Os.14955.1.S1_at	LOC_Os03g31730.1,LOC_Os03g31730.1	Os03g0431600,Os03g0431800	9269925	LOC9269925	-	C7J0D6	expressed protein	-	osa:9269925	-	-	-	-	-	GO:0009536 [Name: plastid]	-	1281.47	1.3405	0	0	Down				Os.5966.1.S1_at
Os.2117.1.S1_s_at	LOC_Os01g33000.1	Os01g0513400	4323985	LOC4323985	PF05623	Q5QND0	expressed protein	-	osa:4323985	-	-	-	-	-	-	-	1682.59	0.8155	0.0001	0	up			Os.15212.1.A1_a_at	LOC_Os01g72990.1,LOC_Os01g72990.2	Os01g0960400,Os01g0960400	4325243	LOC4325243	PF00069; PF08263; PF13855	B8A9J9; B8A9K1; Q5JN27; Q5JN26	expressed protein	-	osa:4325243	-	-	-	-	-	GO:0016021 [Name: integral component of membrane]	GO:0004672 [Name: protein kinase activity]; GO:0005524 [Name: ATP binding]; GO:0004674 [Name: protein serine/threonine kinase activity]	1231	1.7018	0	0	Down				Os.11442.1.S1_at
OsAffx.13142.1.S1_s_at	LOC_Os03g31490.1	Os03g0428800	4333169	LOC4333169	-	Q75I76; B8AKE4; Q10J96; B9F956; Q0DR06	expressed protein	-	osa:4333169	-	-	-	-	-	GO:0016021 [Name: integral component of membrane]; GO:0009535 [Name: chloroplast thylakoid membrane]	-	1686.21	1.1804	0.0001	0	Down			Os.15287.1.S1_at	LOC_Os03g01920.1	Os03g0109700	4331348	LOC4331348	-	Q10SV7	expressed protein	-	osa:4331348	-	-	-	-	-	-	-	644.347	1.9282	0	0	Down				Os.11450.1.S3_a_at
Os.11786.2.S1_at	LOC_Os01g15900.1	Os01g0264000	-	-	PF02701	-	expressed protein	NAC	-	-	-	-	-	-	-	-	163.174	0.2079	0	0	up			Os.15365.1.S1_at	LOC_Os12g37860.1	Os12g0566200	4352548	LOC4352548	PF07001	Q0IMJ5	expressed protein	-	osa:4352548	-	-	-	-	-	GO:0009536 [Name: plastid]	-	1084.52	0.53	0	0	up				Os.12017.1.S1_at
Os.11786.2.S1_x_at	LOC_Os01g15900.1	Os01g0264000	9272566	LOC9272566	PF02701	C5ML36; Q5NBA7	expressed protein	Dof	osa:9272566	-	-	-	-	GO:0006355 [Name: regulation of transcription, DNA-templated]	GO:0005634 [Name: nucleus]	GO:0003677 [Name: DNA binding]	168.507	0.2707	0	0	up			Os.15394.2.S1_x_at	LOC_Os01g31360.2,LOC_Os01g31360.3,LOC_Os01g31360.4,LOC_Os01g31360.5,LOC_Os01g31360.6	Os01g0498200,Os01g0498200,Os01g0498200,Os01g0498200,Os01g0498200	4324539	LOC4324539	-	Q0JMJ0; B8A8L0; B9EX27; Q5VNI7	expressed protein	-	osa:4324539	-	-	-	-	GO:0006355 [Name: regulation of transcription, DNA-templated]; GO:0007623 [Name: circadian rhythm]	-	-	1332.44	0.7114	0	0	up				Os.12268.1.S1_at
Os.12197.1.S1_x_at	LOC_Os03g23010.1,LOC_Os03g23010.2,LOC_Os03g23010.3,LOC_Os03g23010.4,LOC_Os03g23010.5	Os03g0353400,Os03g0353400,Os03g0353400,Os03g0353400,Os03g0353400	4332856	LOC4332856	-	Q0DRU7; Q7XXS2; Q10LE3	expressed protein	-	osa:4332856	-	-	-	-	-	-	-	614.632	0.4188	0	0	up			Os.15734.1.S1_at	LOC_Os08g25700.1	Os08g0345400	9269424	LOC9269424	-	C7J5E6; Q84QU2	expressed protein	-	osa:9269424	-	-	-	-	-	GO:0016021 [Name: integral component of membrane]	-	577.105	1.8764	0	0	Down				Os.53722.1.S1_at
Os.12197.2.S1_a_at	LOC_Os03g23010.1,LOC_Os03g23010.2,LOC_Os03g23010.3,LOC_Os03g23010.4,LOC_Os03g23010.5	Os03g0353400,Os03g0353400,Os03g0353400,Os03g0353400,Os03g0353400	4332856	LOC4332856	-	Q7XXS2; Q0DRU7; Q10LE3	expressed protein	-	osa:4332856	-	-	-	-	-	-	-	1215.24	0.568	0	0	up			Os.15822.1.S1_s_at	LOC_Os08g32980.1,LOC_Os08g32980.2	Os08g0425800,Os08g0425800	4345614	LOC4345614	-	B8BAZ7; Q84Q47	expressed protein	-	osa:4345614	-	-	-	-	-	GO:0016021 [Name: integral component of membrane]	-	94.9082	0.1802	0	0	up				Os.9748.2.S1_x_at
Os.12342.1.S1_at	LOC_Os12g04204.1,LOC_Os12g04204.2,LOC_Os12g04204.5,LOC_Os12g04204.4	Os12g0136500,Os12g0136500,Os12g0136500,Os12g0136500	-	-	-	-	expressed protein	-	-	-	-	-	-	-	-	-	126.458	0.242	0	0	up			Os.15951.1.S1_at	LOC_Os03g48150.1,LOC_Os10g08011.1	Os03g0686500,Os10g0163250	4333757	-	-	Q0DPJ0	expressed protein	-	osa:4333757	-	-	-	-	-	-	-	447.646	2.2312	0	0	Down				Os.22462.1.S1_at
Os.12342.1.S2_at	LOC_Os12g04204.1,LOC_Os12g04204.2,LOC_Os12g04204.3,LOC_Os12g04204.4,LOC_Os12g04204.5	Os12g0136500,Os12g0136500,Os12g0136500,Os12g0136500,Os12g0136500	-	-	PF02330	-	expressed protein	-	-	-	-	-	-	-	-	-	197.738	0.2171	0	0	up			Os.16743.3.S1_at	LOC_Os11g01880.2,LOC_Os11g01880.1,LOC_Os12g01940.2,LOC_Os12g01940.3,LOC_Os12g01940.1	Os11g0110066,Os11g0110066,Os12g0110300,Os12g0110300,Os12g0110300	4351292; 4349576	LOC4351292; LOC4349576	-	B7F8Y2	expressed protein	-	osa:4349576	-	-	-	-	-	-	-	1097.63	0.6187	0	0	up				Os.26062.1.S1_a_at
Os.12791.2.S1_a_at	LOC_Os05g02070.2,LOC_Os05g02070.3	Os05g0111300,Os05g0111300	4337596	LOC4337596	PF01439	A2XZL0; B7E2X6; E5D3L3; A3AZ88	expressed protein	-	osa:4337596	-	-	-	-	GO:0072593 [Name: reactive oxygen species metabolic process]	GO:0005829 [Name: cytosol]	GO:0046872 [Name: metal ion binding]	635.329	1.6756	0	0	Down			Os.16743.3.S1_x_at	LOC_Os11g01880.2,LOC_Os11g01880.1,LOC_Os12g01940.2,LOC_Os12g01940.3,LOC_Os12g01940.1	Os11g0110066,Os11g0110066,Os12g0110300,Os12g0110300,Os12g0110300	4351292; 4349576	LOC4351292; LOC4349576	-	B7F8Y2	expressed protein	-	osa:4349576	-	-	-	-	-	-	-	919.656	0.5878	0	0	up				OsAffx.31541.1.S1_s_at
Os.12791.4.S1_x_at	LOC_Os05g02070.2,LOC_Os05g02070.3	Os05g0111300,Os05g0111300	4337596	LOC4337596	PF01439; PF01535; PF12854; PF13041	A2XZL0; B7E2X6; E5D3L3; Q76C22; A3AZ88	expressed protein	-	osa:4337596	-	-	-	-	GO:0072593 [Name: reactive oxygen species metabolic process]	GO:0005829 [Name: cytosol]; GO:0005739 [Name: mitochondrion]	GO:0046872 [Name: metal ion binding]	661.203	1.6889	0	0	Down			Os.16884.1.S1_at	LOC_Os03g50870.1	Os03g0717900	4333917	LOC4333917	PF05542	Q10DW0; Q10DV9; A6N1R0	expressed protein	-	osa:4333917	-	-	-	-	-	-	-	761.136	0.5018	0	0	up				Os.5957.1.S1_at
Os.15295.1.S1_at	LOC_Os08g19670.1	Os08g0293100	4345192	LOC4345192	-	Q84YX5	expressed protein	-	osa:4345192	-	-	-	-	-	-	-	104.552	0.1332	0	0	up			Os.17506.1.S1_at	LOC_Os10g32680.1,LOC_Os10g32680.2,LOC_Os10g32680.3	Os10g0463800,Os10g0463800,Os10g0463800	4348829	LOC4348829	PF07063	Q337M4	expressed protein	-	osa:4348829	-	-	-	-	-	GO:0005739 [Name: mitochondrion]	-	131.836	0.239	0	0	up				Os.51076.1.S1_at
Os.15295.2.S1_x_at	LOC_Os08g19670.1	Os08g0293100	4345192	LOC4345192	-	Q84YX5; Q5JK34	expressed protein	-	osa:4345192; osa:4326942	-	-	-	-	-	-	-	133.125	0.1588	0	0	up			Os.17597.1.S1_at	LOC_Os02g40040.1	Os02g0614200	4329974	LOC4329974	-	Q6K5Y3	expressed protein	-	osa:4329974	-	-	-	-	-	-	-	714.568	0.4432	0	0	up				Os.7624.1.S1_at
Os.20299.1.S1_a_at	LOC_Os07g45194.1,LOC_Os07g45195.1	Os07g0646600,Os07g0646300	4344101; 4344104	LOC4344104	-	Q7EYL6; B8B540; B8B5A2; B8B562; Q7XIQ6; A3BMT7	expressed protein	-	osa:4344101; osa:4344104	-	-	-	-	-	GO:0005739 [Name: mitochondrion]	-	1177.96	1.4912	0	0	Down			Os.17779.1.S1_at	LOC_Os05g05140.1,LOC_Os05g05140.2	Os05g0143300,Os05g0143300	4337775	LOC4337775	-	A2Y0A7; Q75KK9; B9FH60	expressed protein	-	osa:4337775	-	-	-	-	-	-	-	1071.57	1.671	0	0	Down				Os.9229.3.S1_x_at
Os.20299.2.S1_at	LOC_Os07g45194.1	Os07g0646600	4344104	LOC4344104	-	Q7XIQ6	expressed protein	-	osa:4344104	-	-	-	-	-	GO:0005739 [Name: mitochondrion]	-	992.296	1.6211	0	0	Down			Os.17889.1.S1_at	LOC_Os05g46340.1	Os05g0540900	4339469	LOC4339469	PF14364; PF05553	Q5TKQ1	expressed protein	-	osa:4339469	-	-	-	-	-	GO:0016021 [Name: integral component of membrane]	-	406.94	0.2801	0	0	up				Os.27776.1.S1_at
Os.20299.4.S1_x_at	LOC_Os07g45194.1,LOC_Os07g45195.1,LOC_Os07g45520.1	Os07g0646600,Os07g0646300,Os07g0649600	4344104; 4344101	LOC4344104	-	Q7EYL6; Q7XIQ6; B8B562; A3BMT7	expressed protein	-	osa:4344104; osa:4344101	-	-	-	-	-	GO:0005739 [Name: mitochondrion]	-	1096.9	1.5343	0	0	Down			Os.17902.1.S1_at	LOC_Os05g02420.1,LOC_Os05g02420.2	Os05g0114700,Os05g0114700	9271771	LOC9271771	PF00249	C7J250; Q75L01	expressed protein	-	osa:9271771	-	-	-	-	-	GO:0005634 [Name: nucleus]	GO:0043565 [Name: sequence-specific DNA binding]	1417.36	1.5477	0	0	Down				Os.4859.1.S1_at
Os.2117.1.S1_at	LOC_Os01g33000.1	Os01g0513400	4323985	LOC4323985	PF05623	Q5QND0	expressed protein	-	osa:4323985	-	-	-	-	-	-	-	937.985	0.6735	0	0	up			Os.18087.1.S1_at	LOC_Os03g30570.1,LOC_Os03g30570.2	Os03g0419100,Os03g0419100	4333126	LOC4333126	PF16136; PF07897; PF16135	A3AJ60; Q10JI3; A2XI24	protein of unknown function DUF1675 domain containing protein, expressed	-	osa:4333126	-	-	-	-	GO:0007165 [Name: signal transduction]; GO:0045892 [Name: negative regulation of transcription, DNA-templated]	GO:0005634 [Name: nucleus]	-	885.85	0.4586	0	0	up				Os.50469.1.S1_x_at
Os.2117.2.S1_x_at	LOC_Os01g33000.1	Os01g0513400	4323985	LOC4323985	PF05623	B9EX69; Q5QND0	expressed protein	-	osa:4323985	-	-	-	-	-	-	-	742.759	0.6283	0	0	up			Os.18267.1.S1_at	LOC_Os08g05630.1	Os08g0152500	4344672	LOC4344672	PF10167	Q7EYH5	expressed protein	-	osa:4344672	-	-	-	-	-	-	-	1365.07	0.6249	0	0	up				Os.52073.1.S1_at
Os.23056.1.S1_at	LOC_Os01g68450.1,LOC_Os01g68450.2	Os01g0912700,Os01g0912700	4324318	LOC4324318	PF10184	Q5N7X2	expressed protein	-	osa:4324318	-	-	-	-	-	GO:0016021 [Name: integral component of membrane]; GO:0009507 [Name: chloroplast]	-	1380.3	1.4058	0	0	Down			Os.18342.1.S1_at	LOC_Os05g23130.1	Os05g0296600	-	-	-	-	expressed protein	-	-	-	-	-	-	-	-	-	1378.62	1.3319	0	0	Down				Os.9293.1.S1_at
Os.23056.2.S1_x_at	LOC_Os01g68450.1,LOC_Os01g68450.2	Os01g0912700,Os01g0912700	4324318	LOC4324318	PF10184	B8A843; Q5N7X2	expressed protein	-	osa:4324318	-	-	-	-	-	GO:0016021 [Name: integral component of membrane]; GO:0009507 [Name: chloroplast]	-	1259.69	1.442	0	0	Down			Os.18653.1.S1_at	LOC_Os03g24844.1,LOC_Os03g24844.3	Os03g0363400,Os03g0363400	4332899	LOC4332899	PF03692	Q10L09	expressed protein	-	osa:4332899	K06940	-	-	-	-	GO:0005739 [Name: mitochondrion]	-	800.258	1.5167	0	0	Down				OsAffx.28932.1.S1_at
Os.24326.1.A1_s_at	LOC_Os12g22090.1,LOC_Os12g22090.2,LOC_Os12g22090.4	Os12g0409600,Os12g0409600,Os12g0409600	4352059	LOC4352059	PF03108	Q0INQ5; A2ZJS8; B9GCT7; Q2QT26	expressed protein	-	osa:4352059	-	-	-	-	-	-	-	1061.38	0.658	0	0	up			Os.18681.1.S1_at	LOC_Os01g73120.1	Os01g0962200	4324549	LOC4324549	PF05875	B8A9K7; Q5JMS6	expressed protein	-	osa:4324549	-	-	-	-	GO:0006672 [Name: ceramide metabolic process]	GO:0016021 [Name: integral component of membrane]	GO:0016811 [Name: hydrolase activity, acting on carbon-nitrogen (but not peptide) bonds, in linear amides]	1145.14	0.583	0	0	up				Os.2329.1.S1_a_at
Os.27395.1.S1_a_at	LOC_Os04g57760.1	Os04g0674000	4337376	LOC4337376	-	Q7XQA2; Q0J938	expressed protein	-	osa:4337376	-	-	-	-	-	GO:0009536 [Name: plastid]	-	382.045	0.2889	0	0	up			Os.1880.2.S1_a_at	LOC_Os01g50840.1	Os01g0704300	4324251	LOC4324251	-	Q5N9R9	expressed protein	-	osa:4324251	-	-	-	-	-	-	-	627.789	1.9247	0	0	Down				Os.316.1.S1_at
Os.34819.2.S1_s_at	LOC_Os01g54190.1,LOC_Os05g27110.2,LOC_Os07g22494.1,LOC_Os07g22494.2,LOC_Os07g22494.3,LOC_Os07g22494.4	Os01g0745300,Os05g0337500,Os07g0407700,Os07g0407700,Os07g0407700,Os07g0407700	4342991; 9267030; 4326173	LOC4342991; LOC9267030; LOC4326173	-	Q0JJD8; C7J318; Q0D726; B7F9E3	expressed protein	-	osa:4342991; osa:9267030; osa:4326173	-	-	-	-	-	-	-	1139.86	0.523	0	0	up			Os.18850.1.S1_at	LOC_Os10g30870.1	Os10g0445600	4348745	LOC4348745	PF18579	Q7XDY9	expressed protein	-	osa:4348745	-	-	-	-	-	GO:0009507 [Name: chloroplast]	-	1003.59	1.4233	0	0	Down				Os.7675.1.S1_at
Os.49228.1.S1_at	LOC_Os02g30410.1,LOC_Os02g30410.2	Os02g0507400,Os02g0507400	4329441	LOC4329441	PF04359	Q6K2H3	expressed protein	-	osa:4329441	-	-	-	-	-	GO:0005739 [Name: mitochondrion]	-	548.962	1.2381	0	0	Down			Os.18863.1.S1_at	LOC_Os01g53150.2	Os01g0732200	4324152	LOC4324152	PF01926	Q5JM78	GTPase of unknown function domain containing protein, putative, expressed	-	osa:4324152	K03978	-	-	-	-	-	GO:0005525 [Name: GTP binding]	724.282	1.8903	0	0	Down				Os.17518.1.S1_at
Os.4971.1.S1_at	LOC_Os02g10500.1	Os02g0198500	4328631	LOC4328631	-	Q6H735	expressed protein	-	osa:4328631	-	-	-	-	-	GO:0016021 [Name: integral component of membrane]	-	1035.86	1.9872	0	0	Down			Os.19183.1.S1_at	LOC_Os01g05064.1	Os01g0143900	4325463	-	-	Q5ZBM5	expressed protein	-	osa:4325463	-	-	-	-	-	-	-	896.799	1.5829	0	0	Down				Os.18077.1.S1_at
Os.50862.1.S1_at	LOC_Os10g37240.2,LOC_Os10g37240.3	Os10g0516500,Os10g0516500	4349118	LOC4349118	PF13837	Q0IWD7	expressed protein	Dof	osa:4349118	-	-	-	-	-	-	-	759.715	0.6356	0	0	up			Os.20189.1.S1_at	LOC_Os10g42250.1,LOC_Os10g42250.2	Os10g0573100,Os10g0573100	4349471	LOC4349471	PF01871	Q336P8	expressed protein	-	osa:4349471	-	-	-	-	GO:0009651 [Name: response to salt stress]	GO:0005829 [Name: cytosol]	-	926.987	1.5983	0	0	Down				Os.10786.1.S1_at
Os.50862.1.S1_x_at	LOC_Os10g37240.2,LOC_Os10g37240.3,LOC_Os10g20770.1	Os10g0516500,Os10g0516500,Os10g0348600	4349118	LOC4349118	-	Q0IWD7	expressed protein	Trihelix	osa:4349118	-	-	-	-	-	-	-	967.85	0.6968	0	0	up			Os.20299.2.S1_at	LOC_Os07g45194.1	Os07g0646600	4344104	LOC4344104	-	Q7XIQ6	expressed protein	-	osa:4344104	-	-	-	-	-	GO:0005739 [Name: mitochondrion]	-	799.366	2.0283	0	0	Down				Os.18877.1.S1_at
Os.51300.1.S1_x_at	LOC_Os02g10500.1	Os02g0198500	4328631	LOC4328631	-	Q6H736; Q6H735	expressed protein	-	osa:4328631	-	-	-	-	-	GO:0016021 [Name: integral component of membrane]	-	990.707	1.9853	0	0	Down			Os.20350.1.S1_at	LOC_Os10g03550.1,LOC_Os10g03550.2,LOC_Os10g03550.3	Os10g0124100,Os10g0124100,Os10g0124100	4348008	LOC4348008	-	Q10A65; Q7G607; A2Z4N1	expressed protein	-	osa:4348008	-	-	-	-	-	-	-	1281.73	0.6565	0	0	up				Os.20289.1.S1_at
Os.51564.1.S1_at	LOC_Os04g35070.1	Os04g0429900	4335863	LOC4335863	-	Q0JD59	expressed protein	-	osa:4335863	-	-	-	-	-	-	-	579.693	0.5225	0	0	up			Os.20473.1.S1_s_at	LOC_Os05g33620.1,LOC_Os05g33620.1	Os05g0406000,Os05g0406150	4338755	LOC4338755	-	Q0DI98; B9FID6; B8AY81	expressed protein	-	osa:4338755	-	-	-	-	-	GO:0005886 [Name: plasma membrane]; GO:0016021 [Name: integral component of membrane]	GO:0022857 [Name: transmembrane transporter activity]	1287.01	1.57	0	0	Down				Os.26705.1.S1_at
Os.51564.1.S1_s_at	LOC_Os04g35070.1	Os04g0429900	4335863	LOC4335863	-	Q0JD59	expressed protein	-	osa:4335863	-	-	-	-	-	-	-	553.897	0.4779	0	0	up			Os.20575.1.S1_at	LOC_Os03g62240.1	Os03g0838900	4334719	LOC4334719	PF02536	Q851N3	expressed protein	-	osa:4334719	-	-	-	-	GO:0006355 [Name: regulation of transcription, DNA-templated]; GO:0032502 [Name: developmental process]	GO:0042646 [Name: plastid nucleoid]; GO:0009507 [Name: chloroplast]	GO:0003690 [Name: double-stranded DNA binding]	814.017	1.8954	0	0	Down				Os.5676.1.S1_at
Os.53702.1.S1_x_at	LOC_Os01g40310.1	Os01g0585300	4327654	LOC4327654	PF06549	A2WRV9; Q0JLN9	expressed protein	-	osa:4327654	-	-	-	-	-	GO:0016021 [Name: integral component of membrane]	-	1444.27	1.4878	0	0	Down			Os.20722.2.S1_a_at	LOC_Os05g10754.1,LOC_Os05g10754.2,LOC_Os05g10754.3,LOC_Os11g20179.3,LOC_Os11g20179.1	Os05g0196400,Os05g0196400,Os05g0196400,Os11g0307550,Os11g0307550	4338042	LOC4338042	-	Q0DK43	expressed protein	-	osa:4338042	-	-	-	-	-	-	-	1058.09	0.5841	0	0	up				Os.7200.1.S1_at
Os.5515.1.S1_at	LOC_Os10g37240.2,LOC_Os10g37240.3	Os10g0516500,Os10g0516500	4349118	LOC4349118	PF13837	-	expressed protein	Trihelix	osa:4349118	-	-	-	-	-	-	-	1040.65	0.6782	0	0	up			Os.20722.3.A1_a_at	LOC_Os05g10754.1,LOC_Os05g10754.3,LOC_Os05g10754.2,LOC_Os11g20179.3,LOC_Os11g20179.1,LOC_Os11g20179.2	Os05g0196400,Os05g0196400,Os05g0196400,Os11g0307550,Os11g0307550,Os11g0307550	4338042	LOC4338042	-	Q0DK43	expressed protein	-	osa:4338042	-	-	-	-	-	-	-	678.29	0.4769	0	0	up				Os.34757.1.S1_at
Os.5530.1.S1_at	LOC_Os01g54190.1,LOC_Os05g27110.2	Os01g0745300,Os05g0337500	9267030	LOC9267030	-	B7F9E3; Q0JJD8; C7J318	expressed protein	-	osa:9267030	-	-	-	-	-	-	-	1092.21	0.4842	0	0	up			Os.20810.1.S1_a_at	LOC_Os01g56300.1	Os01g0769000	4325594	LOC4325594	PF04055	A6N0F4; Q5ZAQ3	expressed protein	-	osa:4325594	K12617	osa03018	osa03018 [Pathway Title: RNA degradation]	RNA degradation	GO:0000290 [Name: deadenylation-dependent decapping of nuclear-transcribed mRNA]; GO:0033962 [Name: cytoplasmic mRNA processing body assembly]	GO:0000932 [Name: P-body]	GO:0003723 [Name: RNA binding]	506.03	0.3818	0	0	up				Os.10753.1.S2_a_at
Os.5975.1.S1_at	LOC_Os02g58650.1	Os02g0833400	4331268	LOC4331268	PF05542	B8AFJ4; Q6ESB6	expressed protein	-	osa:4331268	-	-	-	-	-	GO:0005739 [Name: mitochondrion]	-	1175.54	1.4549	0	0	Down			Os.20810.1.S1_at	LOC_Os01g56300.1	Os01g0769000	4325594	LOC4325594	PF09770	A6N0F4; Q5ZAQ3	expressed protein	-	osa:4325594	K12617	osa03018	osa03018 [Pathway Title: RNA degradation]	RNA degradation	GO:0000290 [Name: deadenylation-dependent decapping of nuclear-transcribed mRNA]; GO:0033962 [Name: cytoplasmic mRNA processing body assembly]	GO:0000932 [Name: P-body]	GO:0003723 [Name: RNA binding]	740.164	0.4567	0	0	up				Os.12012.1.S1_at
Os.5975.1.S2_at	LOC_Os02g58650.1	Os02g0833400	4331268	LOC4331268	PF05542	Q6ESB6	expressed protein	-	osa:4331268	-	-	-	-	-	GO:0005739 [Name: mitochondrion]	-	1210.02	1.4952	0	0	Down			Os.20980.1.S1_at	LOC_Os01g56180.1	Os01g0767600	4325501	LOC4325501	-	Q8LIX4	expressed protein	-	osa:4325501	-	-	-	-	-	GO:0005783 [Name: endoplasmic reticulum]	-	277.653	0.327	0	0	up				Os.14830.1.S1_a_at
Os.7137.1.S1_at	LOC_Os01g66980.1,LOC_Os01g66980.2	Os01g0894700,Os01g0894700	4324965	LOC4324965	PF05697	Q5JLV2	expressed protein	-	osa:4324965	-	-	-	-	GO:0043335 [Name: protein unfolding]; GO:0015031 [Name: protein transport]; GO:0051083 [Name: 'de novo' cotranslational protein folding]; GO:0061077 [Name: chaperone-mediated protein folding]	-	GO:0044183 [Name: protein binding involved in protein folding]; GO:0003755 [Name: peptidyl-prolyl cis-trans isomerase activity]; GO:0043022 [Name: ribosome binding]	1283.73	1.4124	0	0	Down			Os.21038.1.S1_s_at	LOC_Os03g56420.1	Os03g0775600	-	-	-	-	expressed protein	-	-	-	-	-	-	-	-	-	1259.09	0.7203	0	0	up				Os.25564.1.S1_at
Os.7137.2.S1_x_at	LOC_Os01g66980.1,LOC_Os01g66980.2	Os01g0894700,Os01g0894700	4324965	LOC4324965	PF05697	B8A7T9; Q5JLV2; B9EVB7	expressed protein	-	osa:4324965	-	-	-	-	GO:0015031 [Name: protein transport]; GO:0006457 [Name: protein folding]; GO:0043335 [Name: protein unfolding]; GO:0051083 [Name: 'de novo' cotranslational protein folding]; GO:0061077 [Name: chaperone-mediated protein folding]	GO:0016021 [Name: integral component of membrane]	GO:0044183 [Name: protein binding involved in protein folding]; GO:0003755 [Name: peptidyl-prolyl cis-trans isomerase activity]; GO:0043022 [Name: ribosome binding]	1116.49	1.4648	0	0	Down			Os.2117.1.S1_at	LOC_Os01g33000.1	Os01g0513400	4323985	LOC4323985	PF05623	Q5QND0	expressed protein	-	osa:4323985	-	-	-	-	-	-	-	534.049	0.3732	0	0	up				Os.32068.1.S1_at
Os.8545.1.S1_at	LOC_Os01g19940.1	Os01g0305200	4323909	LOC4323909	PF04667	Q657U9	expressed protein	-	osa:4323909	-	-	-	-	-	-	-	1572.09	0.7168	0	0	up			Os.2117.1.S1_s_at	LOC_Os01g33000.1	Os01g0513400	4323985	LOC4323985	PF05623	Q5QND0	expressed protein	-	osa:4323985	-	-	-	-	-	-	-	718.543	0.4285	0	0	up				Os.28385.2.S1_a_at
Os.8545.1.S1_s_at	LOC_Os01g19940.1	Os01g0305200	4323909	LOC4323909	PF04667	Q657U9	expressed protein	-	osa:4323909	-	-	-	-	-	-	-	1193.89	0.6451	0	0	up			Os.2117.2.S1_x_at	LOC_Os01g33000.1	Os01g0513400	4323985	LOC4323985	PF05623	B9EX69; Q5QND0	expressed protein	-	osa:4323985	-	-	-	-	-	-	-	370.548	0.3259	0	0	up				Os.35044.2.S1_x_at
Os.8571.1.S1_s_at	LOC_Os01g40310.1	Os01g0585300	4327654	LOC4327654	PF06549	Q0JLN9; A2WRV9	expressed protein	-	osa:4327654	-	-	-	-	-	GO:0016021 [Name: integral component of membrane]	-	1232.63	1.5386	0	0	Down			Os.21784.1.S1_at	LOC_Os08g36140.1	Os08g0463900	4345779	LOC4345779	-	Q6YUA8	expressed protein	-	osa:4345779	-	-	-	-	GO:0048564 [Name: photosystem I assembly]; GO:0010027 [Name: thylakoid membrane organization]; GO:0009561 [Name: megagametogenesis]	GO:0009535 [Name: chloroplast thylakoid membrane]; GO:0009543 [Name: chloroplast thylakoid lumen]; GO:0031977 [Name: thylakoid lumen]	GO:0046872 [Name: metal ion binding]	1133.14	1.4373	0	0	Down				Os.53315.1.S1_x_at
Os.8697.1.S1_at	LOC_Os01g42700.1	Os01g0612600	4325319	LOC4325319	PF07800	B7ECD3; Q0JLA7	expressed protein	-	osa:4325319	-	-	-	-	-	-	-	237.217	0.2709	0	0	up			Os.22940.1.S1_at	LOC_Os02g07010.1	Os02g0166600	4328415	-	-	Q6H4W7	expressed protein	-	osa:4328415	-	-	-	-	-	-	-	1319.14	0.5979	0	0	up				Os.38131.1.S1_at
Os.8697.1.S2_at	LOC_Os01g42700.1,LOC_Os01g42700.2,LOC_Os01g42700.3,LOC_Os01g42700.4,LOC_Os01g42700.5	Os01g0612600,Os01g0612600,Os01g0612600,Os01g0612600,Os01g0612600	4325319	LOC4325319	PF07800	B7ECD3; Q0JLA7	expressed protein	-	osa:4325319	-	-	-	-	-	-	-	879.26	0.6163	0	0	up			Os.23113.1.S1_at	LOC_Os04g34610.1	Os04g0423600	4335844	LOC4335844	PF00856	Q0JD76	expressed protein	-	osa:4335844	K11426	-	-	-	-	GO:0009536 [Name: plastid]	-	798.634	0.5124	0	0	up				Os.9489.1.S1_s_at
Os.8901.1.S1_at	LOC_Os02g22130.1	Os02g0327000	4329192	LOC4329192	PF00168	A6N0Y5; Q6YWF1	expressed protein	-	osa:4329192	-	-	-	-	GO:0009738 [Name: abscisic acid-activated signaling pathway]; GO:0006952 [Name: defense response]; GO:0009611 [Name: response to wounding]; GO:0043547 [Name: positive regulation of GTPase activity]; GO:1901002 [Name: positive regulation of response to salt stress]; GO:1902479 [Name: positive regulation of defense response to bacterium, incompatible interaction]; GO:0009651 [Name: response to salt…	GO:0005829 [Name: cytosol]; GO:0005634 [Name: nucleus]; GO:0005886 [Name: plasma membrane]	GO:0016301 [Name: kinase activity]; GO:0005096 [Name: GTPase activator activity]; GO:0008289 [Name: lipid binding]; GO:0046872 [Name: metal ion binding]	522.965	0.445	0	0	up			Os.23605.1.A1_at	LOC_Os01g20120.1,LOC_Os01g20120.2	Os01g0306900,Os01g0306900	4327756	LOC4327756	PF05623	Q656E5	expressed protein	-	osa:4327756	-	-	-	-	-	-	-	1293.9	1.5896	0	0	Down				Os.12248.1.S1_at
Os.8901.1.S2_at	LOC_Os02g22130.1	Os02g0327000	4329192	LOC4329192	PF00168	Q6YWF1; A6N0Y5	expressed protein	-	osa:4329192	-	-	-	-	GO:0009738 [Name: abscisic acid-activated signaling pathway]; GO:0006952 [Name: defense response]; GO:0009611 [Name: response to wounding]; GO:0043547 [Name: positive regulation of GTPase activity]; GO:1901002 [Name: positive regulation of response to salt stress]; GO:1902479 [Name: positive regulation of defense response to bacterium, incompatible interaction]; GO:0009651 [Name: response to salt…	GO:0005829 [Name: cytosol]; GO:0005634 [Name: nucleus]; GO:0005886 [Name: plasma membrane]	GO:0005096 [Name: GTPase activator activity]; GO:0008289 [Name: lipid binding]; GO:0046872 [Name: metal ion binding]; GO:0016301 [Name: kinase activity]	801.543	0.5338	0	0	up			Os.23648.1.S1_s_at	LOC_Os06g51240.1,LOC_Os06g51240.2	Os06g0728500,Os06g0728500	4342133	LOC4342133	-	Q5Z7N2	expressed protein	-	osa:4342133	-	-	-	-	-	-	-	1364.32	1.5741	0	0	Down				Os.49097.1.S1_at
OsAffx.14458.1.S1_x_at	LOC_Os04g57760.1	Os04g0674000	4337376	LOC4337376	-	Q0J938; Q7XQA2	expressed protein	-	osa:4337376	-	-	-	-	-	GO:0009536 [Name: plastid]	-	200.559	0.2688	0	0	up			Os.23808.3.S1_x_at	LOC_Os05g03750.1	Os05g0128100	4337691	LOC4337691	-	Q0DL23	expressed protein	-	osa:4337691	-	-	-	-	-	GO:0016021 [Name: integral component of membrane]	-	1228.62	1.5547	0	0	Down				Os.5150.1.S1_at
OsAffx.19773.1.S1_x_at	LOC_Os12g22090.2,LOC_Os12g22090.4,LOC_Os12g22090.1	Os12g0409600,Os12g0409600,Os12g0409600	4352059	LOC4352059	-	Q0INQ5	expressed protein	-	osa:4352059	-	-	-	-	-	-	-	943.205	0.6711	0	0	up			Os.24684.1.S1_at	LOC_Os03g20640.1	Os03g0322600	4332686	LOC4332686	-	Q10M56; B8ANE9	expressed protein	-	osa:4332686	-	-	-	-	-	GO:0005739 [Name: mitochondrion]	-	1230.14	1.5437	0	0	Down				Os.53660.1.S1_at
OsAffx.23005.1.S1_at	LOC_Os06g04210.1	Os06g0133200	9269221	LOC9269221	-	Q5VRP9	expressed protein	-	osa:9269221	-	-	-	-	-	GO:0005739 [Name: mitochondrion]	-	1374.43	1.5913	0	0	Down			Os.25102.1.S1_at	LOC_Os03g58910.2,LOC_Os03g58910.2	Os03g0803700,Os03g0803800	4334479	LOC4334479	PF13020	Q0DML2	expressed protein	-	osa:4334479	-	-	-	-	-	-	-	848.511	0.4754	0	0	up				Os.10500.1.S1_at
OsAffx.23005.1.S1_x_at	LOC_Os06g04210.1	Os06g0133200	9269221	LOC9269221	-	Q5VRP9	expressed protein	-	osa:9269221	-	-	-	-	-	GO:0005739 [Name: mitochondrion]	-	1421.88	1.5724	0	0	Down			Os.25130.1.S1_at	LOC_Os08g02460.1	Os08g0117900	4344528	LOC4344528	PF10248	Q6ZJ59	expressed protein	-	osa:4344528	-	-	-	-	-	GO:0005886 [Name: plasma membrane]	-	322.028	0.3275	0	0	up				Os.170.3.S1_at
OsAffx.2808.1.S1_s_at	LOC_Os02g30410.1,LOC_Os02g30410.2	Os02g0507400,Os02g0507400	4329441	LOC4329441	PF04359	B8AID5; B9F064; Q6K2H3	expressed protein	-	osa:4329441	-	-	-	-	-	GO:0005739 [Name: mitochondrion]	-	1108.01	1.1854	0	0	Down			Os.25180.1.S1_at	LOC_Os08g27050.1	Os08g0359300	4345368	LOC4345368	PF00561	Q0J671; Q6YZK1	expressed protein	-	osa:4345368	-	-	-	-	GO:0044255 [Name: cellular lipid metabolic process]	GO:0009536 [Name: plastid]	GO:0004252 [Name: serine-type endopeptidase activity]; GO:0016298 [Name: lipase activity]	520.595	0.3899	0	0	up				Os.27593.1.S1_at
Os.27417.1.S1_at	LOC_Os01g52170.1	Os01g0719700	4324700	LOC4324700	PF01883; PF10609; PF06155	A2WUI9; Q0JJS8	expressed protein	-	osa:4324700	-	-	-	-	GO:0016226 [Name: iron-sulfur cluster assembly]	GO:0009570 [Name: chloroplast stroma]	GO:0005524 [Name: ATP binding]; GO:0051539 [Name: 4 iron, 4 sulfur cluster binding]; GO:0046872 [Name: metal ion binding]	2019.09	1.2464	0.0096	0.0024	Down			Os.25870.2.S1_a_at	LOC_Os02g12870.1,LOC_Os02g12870.2,LOC_Os02g12870.3,LOC_Os02g12870.4,LOC_Os02g12870.5,LOC_Os02g12870.6	Os02g0221600,Os02g0221600,Os02g0221600,Os02g0221600,Os02g0221600,Os02g0221600	4328759	LOC4328759	-	A0A0P0VGP5	expressed protein	-	osa:4328759	-	-	-	-	-	GO:0016021 [Name: integral component of membrane]	-	1048.97	0.5451	0	0	up				OsAffx.24643.1.S1_s_at
Os.21222.1.S1_s_at	LOC_Os01g70740.1,LOC_Os02g34470.2,LOC_Os02g34470.3	Os01g0933600,Os02g0549700,Os02g0549700	9268621	LOC9268621	-	A6N0M5; B7EG78; Q5JMZ1	expressed protein	-	osa:9268621	-	-	-	-	-	-	-	2002.9	0.7864	0.0092	0.002	up			Os.26714.1.S1_at	LOC_Os03g55130.2	Os03g0758600	4334175	LOC4334175	PF05904	Q0DNE0; Q10CJ6	expressed protein	-	osa:4334175	-	-	-	-	-	-	-	1363.72	1.5623	0	0	Down				Os.11944.1.S2_s_at
Os.10260.1.S1_at	LOC_Os02g51700.1	Os02g0753200	4330754	LOC4330754	-	Q6ZGP6	expressed protein	-	osa:4330754	-	-	-	-	-	-	-	2015.11	1.3502	0.0091	0.0023	Down			Os.26738.1.S1_at	LOC_Os01g46590.1,LOC_Os01g46590.2	Os01g0654200,Os01g0654200	4324173	LOC4324173	PF02163	Q5VPD2	expressed protein	-	osa:4324173	-	-	-	-	-	GO:0016021 [Name: integral component of membrane]	GO:0004222 [Name: metalloendopeptidase activity]	1298.64	0.6268	0	0	up				Os.10281.1.S1_at
Os.7283.2.S1_x_at	LOC_Os03g58590.1	Os03g0800100	9268667	LOC9268667	PF09732	C7J004	expressed protein	-	osa:9268667	-	-	-	-	-	GO:0009536 [Name: plastid]	-	2013	1.4357	0.009	0.0022	Down			Os.26753.1.S1_at	LOC_Os07g13590.1	Os07g0240300	4342806	LOC4342806	PF11891	Q7F0B4	expressed protein	-	osa:4342806	-	-	-	-	-	GO:0016021 [Name: integral component of membrane]	-	1122.62	1.6917	0	0	Down				Os.37926.1.S1_at
Os.20672.1.S2_at	LOC_Os08g37610.1,LOC_Os08g37610.2	Os08g0482100,Os08g0482100	4345857	LOC4345857	PF07766	Q6Z233	expressed protein	-	osa:4345857	-	-	-	-	-	GO:0016021 [Name: integral component of membrane]	-	1996.04	0.7839	0.0087	0.0019	up			Os.27161.1.S1_at	LOC_Os01g47460.1,LOC_Os01g47460.2	Os01g0664100,Os01g0664100	4327867	LOC4327867	PF01544	B8A765; Q5SN65	expressed protein	-	osa:4327867	-	-	-	-	-	GO:0016021 [Name: integral component of membrane]	GO:0046873 [Name: metal ion transmembrane transporter activity]	1165.6	0.5563	0	0	up				Os.49692.1.S1_at
Os.4660.1.S1_s_at	LOC_Os03g10860.1	Os03g0206400	4331997	LOC4331997	-	Q8H071	expressed protein	-	osa:4331997	-	-	-	-	-	GO:0005739 [Name: mitochondrion]	-	2010.68	1.8462	0.0087	0.0022	Down			Os.27295.1.S1_at	LOC_Os08g08586.1,LOC_Os08g08586.3,LOC_Os01g64350.1,LOC_Os01g64350.2,LOC_Os08g08586.4,LOC_Os08g08586.2	Os08g0184600,Os08g0184600,Os01g0863166,Os01g0863166,Os08g0184600,Os08g0184600	4344827	LOC4344827	-	Q0J7K6	expressed protein	-	osa:4344827	-	-	-	-	-	-	-	1049.9	0.5905	0	0	up				Os.17049.1.S1_at
Os.54496.1.S1_x_at	LOC_Os05g23393.1	Os05g0298900	4338338	-	-	Q0DJD4	expressed protein	-	osa:4338338	-	-	-	-	-	-	-	2009.45	1.312	0.0086	0.0021	Down			Os.27383.2.S1_at	LOC_Os03g48710.1,LOC_Os03g48710.2,LOC_Os03g48710.3,LOC_Os03g48710.4	Os03g0693400,Os03g0693400,Os03g0693400,Os03g0693400	4333789	LOC4333789	PF04398	Q10EV2	expressed protein	-	osa:4333789	-	-	-	-	-	-	-	736.727	0.4621	0	0	up				Os.3623.1.S1_at
Os.5637.1.S1_at	LOC_Os06g20390.1	Os06g0308800	4340850	LOC4340850	PF04652	Q5Z4L5	expressed protein	-	osa:4340850	K12199	osa04144	osa04144 [Pathway Title: Endocytosis]	Endocytosis	GO:0009814 [Name: defense response, incompatible interaction]; GO:1900426 [Name: positive regulation of defense response to bacterium]; GO:1903335 [Name: regulation of vacuolar transport]; GO:0080001 [Name: mucilage extrusion from seed coat]; GO:0016192 [Name: vesicle-mediated transport]	GO:0005771 [Name: multivesicular body]; GO:0005634 [Name: nucleus]	GO:0042803 [Name: protein homodimerization activity]	1994.7	0.7527	0.0085	0.0019	up			Os.27383.2.S1_x_at	LOC_Os03g48710.1,LOC_Os03g48710.2,LOC_Os03g48710.4,LOC_Os03g48710.3	Os03g0693400,Os03g0693400,Os03g0693400,Os03g0693400	4333789	LOC4333789	PF04398	Q10EV2	expressed protein	-	osa:4333789	-	-	-	-	-	-	-	715.202	0.455	0	0	up				Os.27916.1.S1_at
Os.12849.2.S1_x_at	LOC_Os01g68380.1,LOC_Os01g68380.2	Os01g0911800,Os01g0911800	4324315	LOC4324315	-	Q8S0A4; A2WY77; Q84VA3	expressed protein	-	osa:4324315	-	-	-	-	-	GO:0009536 [Name: plastid]	-	1992.05	0.8156	0.0083	0.0018	up			Os.27510.1.A1_at	LOC_Os06g05390.1,LOC_Os06g05390.2	Os06g0146300,Os06g0146300	4340112	LOC4340112	PF09353	Q0DEL6	expressed protein	-	osa:4340112	-	-	-	-	-	-	-	1257.91	1.609	0	0	Down				Os.11194.1.S1_at
Os.22987.1.S1_at	LOC_Os10g28710.1	Os10g0423000	4348662	LOC4348662	-	Q7XEG8	expressed protein	-	osa:4348662	-	-	-	-	-	-	-	1997.66	1.5838	0.0076	0.0019	Down			Os.27759.1.S1_at	LOC_Os01g46720.1	Os01g0655500	4324179	LOC4324179	-	B9EYE5; Q5SN79; B8A6V2	expressed protein	-	osa:4324179	-	-	-	-	GO:0006468 [Name: protein phosphorylation]	GO:0005634 [Name: nucleus]; GO:0005737 [Name: cytoplasm]	GO:0004672 [Name: protein kinase activity]; GO:0005524 [Name: ATP binding]; GO:0004693 [Name: cyclin-dependent protein serine/threonine kinase activity]	1219.3	1.3035	0	0	Down				Os.11919.1.S1_at
Os.6981.1.S1_at	LOC_Os01g48500.1	Os01g0676200	4325517	LOC4325517	-	Q8LQP4	expressed protein	-	osa:4325517	-	-	-	-	-	-	-	1992.36	1.2477	0.0072	0.0018	Down			Os.27798.1.S1_a_at	LOC_Os07g34650.1	Os07g0530700	4343451	LOC4343451	-	Q8GVP5	expressed protein	-	osa:4343451	-	-	-	-	-	GO:0016021 [Name: integral component of membrane]	-	888.526	1.6081	0	0	Down				Os.4718.1.S1_at
Os.4335.1.S1_at	LOC_Os03g03770.1	Os03g0129900	4331499	LOC4331499	PF05676	Q8H879; Q0DVH3	expressed protein	-	osa:4331499	K03963	osa00190; osa01100	osa00190 [Pathway Title: Oxidative phosphorylation]; osa01100 [Pathway Title: Metabolic pathways]	Oxidative phosphorylation; Metabolic pathways	-	GO:0005739 [Name: mitochondrion]	GO:0008137 [Name: NADH dehydrogenase (ubiquinone) activity]	1991.42	1.3642	0.0071	0.0017	Down			Os.27807.1.S1_at	LOC_Os03g01740.1	Os03g0107700	4331332	LOC4331332	-	Q10SY2	expressed protein	-	osa:4331332	-	-	-	-	GO:0071901 [Name: negative regulation of protein serine/threonine kinase activity]; GO:0007049 [Name: cell cycle]	GO:0005634 [Name: nucleus]	GO:0004861 [Name: cyclin-dependent protein serine/threonine kinase inhibitor activity]	337.801	0.3194	0	0	up				Os.7916.1.S1_at
Os.38256.1.S1_at	LOC_Os03g16460.1,LOC_Os03g16460.1	Os03g0271350,Os03g0271400	4332391	LOC4332391	PF08609	Q10NF0	expressed protein	-	osa:4332391	K09562	osa04141	osa04141 [Pathway Title: Protein processing in endoplasmic reticulum]	Protein processing in endoplasmic reticulum	-	GO:0005737 [Name: cytoplasm]; GO:0005783 [Name: endoplasmic reticulum]	GO:0000774 [Name: adenyl-nucleotide exchange factor activity]	1988.7	1.0161	0.007	0.0017	Down			Os.28055.2.S1_at	LOC_Os05g01280.1	Os05g0103300	4337540	LOC4337540	PF11820	Q75M31; A6N136	expressed protein	-	osa:4337540	-	-	-	-	-	GO:0016021 [Name: integral component of membrane]	-	439.254	2.317	0	0	Down				Os.5288.1.S1_a_at
Os.1151.1.S1_at	LOC_Os03g40920.1	Os03g0606200	4333416	LOC4333416	-	C8CMP2; Q0DQD8; Q9AYP0	expressed protein	-	osa:4333416	-	-	-	-	-	GO:0016021 [Name: integral component of membrane]	GO:0016787 [Name: hydrolase activity]	1981.88	1.2629	0.0064	0.0015	Down			Os.28176.1.S1_at	LOC_Os01g61680.1	Os01g0833400	4327406	LOC4327406	-	Q5QLC1	expressed protein	-	osa:4327406	-	-	-	-	-	-	-	237.354	0.2486	0	0	up				Os.28422.1.S1_at
Os.27346.1.S1_at	LOC_Os03g49630.1,LOC_Os03g49630.2	Os03g0703300,Os03g0703300	4333844	LOC4333844	-	Q75I97	expressed protein	-	osa:4333844	-	-	-	-	-	GO:0016021 [Name: integral component of membrane]	-	1967.71	0.8178	0.0064	0.0014	up			Os.30861.1.S1_at	LOC_Os07g13950.1	Os07g0243100	4342818	LOC4342818	PF02953	Q7XI32	expressed protein	-	osa:4342818	-	-	-	-	GO:0045039 [Name: protein import into mitochondrial inner membrane]	GO:0005743 [Name: mitochondrial inner membrane]; GO:0042721 [Name: mitochondrial inner membrane protein insertion complex]	GO:0046872 [Name: metal ion binding]; GO:0008565 [Name: protein transporter activity]	1328.04	1.531	0	0	Down				Os.8274.1.S1_at
Os.17682.1.S1_at	LOC_Os03g61140.1,LOC_Os03g61140.2	Os03g0826700,Os03g0826700	4334642	LOC4334642	PF10294	Q10B95	expressed protein	-	osa:4334642	-	-	-	-	-	-	-	1977.88	1.1849	0.0062	0.0015	Down			Os.31151.2.S1_at	LOC_Os03g59180.1,LOC_Os03g59180.2	Os03g0806600,Os03g0806600	4334503	LOC4334503	-	Q10BS2; B8ALT1; B9F6V2	expressed protein	-	osa:4334503	-	-	-	-	-	GO:0016021 [Name: integral component of membrane]	-	221.254	0.3401	0	0	up				Os.12226.1.S1_at
Os.17736.1.S1_at	LOC_Os01g05130.1	Os01g0144600	4325469	LOC4325469	PF10175	Q5ZBL4	expressed protein	-	osa:4325469	K12593	osa03018	osa03018 [Pathway Title: RNA degradation]	RNA degradation	GO:0000460 [Name: maturation of 5.8S rRNA]	GO:0000176 [Name: nuclear exosome (RNase complex)]	-	1964.44	0.761	0.0062	0.0013	up			Os.31379.1.S1_s_at	LOC_Os10g41560.1	Os10g0565300	4349418	LOC4349418	PF06101	Q336R4	expressed protein	-	osa:4349418	-	-	-	-	-	-	-	204.304	0.2992	0	0	up				Os.12457.1.S1_at
Os.23129.1.A1_s_at	LOC_Os07g39840.1	Os07g0587100	4343755	LOC4343755	PF03407	B8B840; B9FY59; Q6ZIQ4	expressed protein	-	osa:4343755	-	-	-	-	GO:0071555 [Name: cell wall organization]	GO:0000139 [Name: Golgi membrane]	GO:0016757 [Name: transferase activity, transferring glycosyl groups]	1978.89	1.462	0.0062	0.0015	Down			Os.32279.1.S1_at	LOC_Os01g63410.1	Os01g0853000	4324817	LOC4324817	-	B8ACF8; Q5N9C0	expressed protein	-	osa:4324817	-	-	-	-	-	GO:0016021 [Name: integral component of membrane]; GO:0009507 [Name: chloroplast]	-	939.747	0.5897	0	0	up				Os.15463.1.S1_x_at
Os.16479.1.S1_at	LOC_Os06g37070.1	Os06g0567000	4341334	LOC4341334	PF05542; PF05251	Q2R4Y4; A6N0T8; A6N1M8; Q5Z647	expressed protein	-	osa:4341334	-	-	-	-	GO:0006487 [Name: protein N-linked glycosylation]	GO:0016021 [Name: integral component of membrane]; GO:0034998 [Name: oligosaccharyltransferase I complex]	-	1975.21	1.1489	0.0059	0.0014	Down			Os.32540.1.S1_at	LOC_Os04g51770.1,LOC_Os04g51770.2	Os04g0606700,Os04g0606700	4336919	LOC4336919	-	Q7XS50	expressed protein	-	osa:4336919	-	-	-	-	-	-	-	1338.05	0.5938	0	0	up				Os.5110.1.S1_at
Os.7309.2.S1_at	LOC_Os12g01360.1,LOC_Os11g01330.1,LOC_Os11g01330.1	Os12g0104300,Os11g0104300,Os11g0104350	4351252	LOC4351252	PF02861	Q2QYW5	expressed protein	-	osa:4351252	-	-	-	-	GO:0019538 [Name: protein metabolic process]	-	-	1975.12	1.3615	0.0059	0.0014	Down			Os.34466.1.S1_s_at	LOC_Os01g07970.1	Os01g0175100	4327132	LOC4327132	-	Q5VQZ9	expressed protein	-	osa:4327132	-	-	-	-	-	-	-	962.482	0.5077	0	0	up				Os.7614.1.S1_at
Os.27717.1.S1_a_at	LOC_Os01g58470.1	Os01g0798500	4327627	LOC4327627	-	Q5VQK9; B8AAV3; Q5VQL0	expressed protein	-	osa:4327627	-	-	-	-	GO:0010286 [Name: heat acclimation]; GO:0080183 [Name: response to photooxidative stress]; GO:0009414 [Name: response to water deprivation]; GO:0042538 [Name: hyperosmotic salinity response]; GO:0048564 [Name: photosystem I assembly]; GO:0009658 [Name: chloroplast organization]	GO:0009535 [Name: chloroplast thylakoid membrane]; GO:0016021 [Name: integral component of membrane]	-	1966.94	1.2841	0.0055	0.0013	Down			Os.34789.1.S1_at	LOC_Os07g11300.1	Os07g0213500	-	-	-	-	expressed protein	-	-	-	-	-	-	-	-	-	217.401	0.2554	0	0	up				OsAffx.28380.1.S1_s_at
Os.11916.1.S1_at	LOC_Os11g11980.1	Os11g0227000	4350119	LOC4350119	-	Q0ITQ9	expressed protein	-	osa:4350119	-	-	-	-	-	-	-	1951.37	0.7348	0.0053	0.0011	up			Os.35193.1.S1_at	LOC_Os04g50864.1	Os04g0596400	4336847	LOC4336847	PF01883	Q0JAJ1	expressed protein	-	osa:4336847	-	-	-	-	GO:0016226 [Name: iron-sulfur cluster assembly]	-	-	1321.3	0.5715	0	0	up				Os.9514.1.S1_at
Os.6723.1.S1_s_at	LOC_Os02g33330.1	Os02g0536500	4329572	LOC4329572	-	Q6EU57	expressed protein	-	osa:4329572	-	-	-	-	-	-	-	1944.53	1.407	0.005	0.0011	up			Os.37365.1.S1_at	LOC_Os02g43519.1	Os02g0651500	4330169	LOC4330169	-	Q0DZ29	expressed protein	-	osa:4330169	-	-	-	-	-	GO:0016021 [Name: integral component of membrane]	-	895.807	0.5067	0	0	up				Os.18503.1.S1_s_at
Os.21073.1.S1_at	LOC_Os04g50860.1	Os04g0596300	4336846	LOC4336846	PF05542	Q0JAJ2; B8ATK2; Q7X6P4	expressed protein	-	osa:4336846	-	-	-	-	-	GO:0009570 [Name: chloroplast stroma]	-	1951.77	1.02	0.0047	0.0011	Down			Os.37869.2.S1_a_at	LOC_Os01g15270.1	Os01g0256500	4327719	LOC4327719	PF03242	B1PXF8; B7EFV3; B8ABU3; A6N1D4; Q1EHU2; Q40647; Q8RYA3; O22538; Q0JNY8; A2TEQ3	expressed protein	-	osa:4327719	-	-	-	-	-	GO:0016021 [Name: integral component of membrane]; GO:0005739 [Name: mitochondrion]	-	387.107	0.3667	0	0	up				Os.20136.1.S1_a_at
Os.20234.2.S1_at	LOC_Os11g14570.1,LOC_Os11g14570.2	Os11g0252400,Os11g0252400	4350215	LOC4350215	PF12796; PF13962	A2WTY2; Q53N02	expressed protein	-	osa:4350215	-	-	-	-	-	GO:0016021 [Name: integral component of membrane]; GO:0016020 [Name: membrane]	-	1929.03	0.9144	0.0043	0.0009	up			Os.37909.1.S1_at	LOC_Os05g27780.1	Os05g0344200	4338477	LOC4338477	-	Q5W6M4	expressed protein	-	osa:4338477	-	-	-	-	-	-	-	920.31	0.4977	0	0	up				Os.46726.1.S1_x_at
Os.8557.1.S1_at	LOC_Os05g05060.1	Os05g0142400	4337769	-	-	Q75KL6	expressed protein	-	osa:4337769	-	-	-	-	-	-	-	1928.73	0.9568	0.0043	0.0009	up			Os.38219.1.A1_at	LOC_Os03g48380.1	Os03g0689900	4333772	LOC4333772	-	A0A0P0W2C1	expressed protein	-	osa:4333772	-	-	-	-	-	-	-	732.986	0.4669	0	0	up				OsAffx.13549.1.S1_at
Os.37452.1.S1_at	LOC_Os02g18090.1	Os02g0282100	4329028	LOC4329028	-	Q6K3C6	expressed protein	-	osa:4329028	-	-	-	-	-	-	-	1920.36	1.3673	0.0034	0.0008	Down			Os.38256.1.S1_at	LOC_Os03g16460.1,LOC_Os03g16460.1	Os03g0271350,Os03g0271400	4332391	LOC4332391	PF08609	Q10NF0	expressed protein	-	osa:4332391	K09562	osa04141	osa04141 [Pathway Title: Protein processing in endoplasmic reticulum]	Protein processing in endoplasmic reticulum	-	GO:0005783 [Name: endoplasmic reticulum]; GO:0005737 [Name: cytoplasm]	GO:0000774 [Name: adenyl-nucleotide exchange factor activity]	730.303	0.4781	0	0	up				Os.14883.1.S1_a_at
Os.4441.1.S1_at	LOC_Os06g01770.2	Os06g0106900	4339869	LOC4339869	-	Q9LWX9; A2Y8D1	expressed protein	-	osa:4339869	-	-	-	-	-	-	-	1917.06	1.6228	0.0032	0.0007	Down			Os.38283.1.S3_a_at	LOC_Os05g41550.2,LOC_Os05g41550.3,LOC_Os05g41550.5	Os05g0495300,Os05g0495300,Os05g0495300	4339197	-	-	Q65X72; Q0DH29	expressed protein	-	osa:4339197	-	-	-	-	-	GO:0016021 [Name: integral component of membrane]	-	606.731	0.4878	0	0	up				Os.10131.1.S1_a_at
Os.21264.1.S1_s_at	LOC_Os12g27994.1,LOC_Os12g27994.2,LOC_Os12g27994.2	Os12g0465700,Os12g0465700,Os12g0465800	4352186	LOC4352186	PF15249	Q0INF4; G5ENJ7	expressed protein	-	osa:4352186	-	-	-	-	-	-	-	1907.34	1.5338	0.0029	0.0006	Down			Os.38416.1.A1_at	LOC_Os03g50270.1	Os03g0710600	4333878	LOC4333878	-	Q53RJ7	expressed protein	-	osa:4333878	-	-	-	-	-	GO:0016021 [Name: integral component of membrane]	-	1011.18	1.6696	0	0	Down				Os.27566.1.S1_s_at
Os.4868.1.S1_at	LOC_Os01g32300.1,LOC_Os01g32300.2	Os01g0507500,Os01g0507500	4324047	LOC4324047	PF09816	Q8LJL5	expressed protein	-	osa:4324047	K15186	-	-	-	GO:0006355 [Name: regulation of transcription, DNA-templated]	GO:0032783 [Name: ELL-EAF complex]	-	1890.51	0.7605	0.0027	0.0005	up			Os.4266.1.S1_at	LOC_Os02g10090.1,LOC_Os02g10090.2	Os02g0194300,Os02g0194300	4328600	LOC4328600	PF08743	Q0E347; B7EKP9	expressed protein	-	osa:4328600	-	-	-	-	GO:0006310 [Name: DNA recombination]; GO:0006281 [Name: DNA repair]	GO:0005634 [Name: nucleus]; GO:0030915 [Name: Smc5-Smc6 complex]	-	1298.79	0.6133	0	0	up				Os.35511.1.S1_at
Os.5245.1.S1_at	LOC_Os03g63380.1	Os03g0850800	4334797	LOC4334797	-	Q851Z1	expressed protein	-	osa:4334797	-	-	-	-	-	-	-	1890.22	0.841	0.0027	0.0005	up			Os.4321.1.S1_at	LOC_Os03g03640.1	Os03g0128400	4331488	LOC4331488	-	Q9SNL3	expressed protein	-	osa:4331488	-	-	-	-	-	GO:0016021 [Name: integral component of membrane]	-	515.315	2.1572	0	0	Down				Os.5388.1.S1_at
Os.22981.1.S1_at	LOC_Os03g53980.1,LOC_Os03g53980.2	Os03g0751000,Os03g0751000	4334128	LOC4334128	PF04241	Q75LL8	expressed protein	-	osa:4334128	-	-	-	-	-	GO:0016021 [Name: integral component of membrane]	-	1894.22	1.4419	0.0024	0.0005	Down			Os.43236.1.S1_at	LOC_Os08g32520.1	Os08g0420700	4345590	LOC4345590	PF14009	Q8H341	expressed protein	-	osa:4345590	-	-	-	-	-	-	-	713.273	0.442	0	0	up				Os.1502.1.S1_at
Os.27415.1.S1_at	LOC_Os07g08290.1	Os07g0180300	4342561	LOC4342561	PF13968; PF04578	Q6ZLC6	expressed protein	-	osa:4342561	-	-	-	-	-	GO:0016021 [Name: integral component of membrane]	-	1890.42	1.2573	0.0023	0.0005	Down			Os.4506.3.S1_x_at	LOC_Os06g02370.1,LOC_Os06g02370.3	Os06g0113900,Os06g0113900	4339909	P0541H01.18-1	-	Q9LWT7; B7ETL1	expressed protein	-	osa:9267527	-	-	-	-	-	GO:0016021 [Name: integral component of membrane]	-	1186.43	1.5614	0	0	Down				Os.16784.1.S1_at
OsAffx.25259.1.S1_s_at	LOC_Os03g27820.1	Os03g0395600	4333036	LOC4333036	-	Q0DRD1; Q94LG9; Q10K57	expressed protein	-	osa:4333036	-	-	-	-	-	-	-	1876.22	0.8353	0.0023	0.0005	up			Os.4616.1.S1_at	LOC_Os02g48184.1	Os02g0712400	4330500	-	-	Q0DY68	expressed protein	-	osa:4330500	-	-	-	-	-	-	-	1024.54	0.5134	0	0	up				Os.5830.1.S1_at
Os.15847.1.A1_at	LOC_Os08g37820.1	Os08g0484800	4345875	LOC4345875	-	A0A0P0XH93	expressed protein	-	osa:4345875	-	-	-	-	-	GO:0009941 [Name: chloroplast envelope]; GO:0016021 [Name: integral component of membrane]	-	1868.84	0.705	0.0021	0.0004	up			Os.46304.1.S1_a_at	LOC_Os06g45090.1,LOC_Os06g45090.2	Os06g0661766,Os06g0661766	9271699	LOC9271699	-	C7J421	expressed protein	-	osa:9271699	-	-	-	-	-	-	-	1244.39	0.5661	0	0	up				Os.4156.1.S1_at
Os.22623.1.S1_x_at	LOC_Os05g04070.1,LOC_Os05g04090.1	Os05g0131100,Os05g0131401	4337711	LOC4337711	PF13225	Q65XT7	expressed protein	-	osa:4337711	-	-	-	-	-	GO:0009536 [Name: plastid]	-	1878.36	1.1319	0.002	0.0004	Down			Os.4633.1.S1_at	LOC_Os01g59970.1	Os01g0815400	4327481	LOC4327481	-	Q5N756	expressed protein	-	osa:4327481	-	-	-	-	-	GO:0031410 [Name: cytoplasmic vesicle]	-	871.856	0.5258	0	0	up				Os.49533.1.S1_at
OsAffx.6385.1.S1_x_at	LOC_Os09g24440.1,LOC_Os09g24440.1,LOC_Os09g24440.1	Os09g0409950,Os09g0410125,Os09g0410300	4347029	LOC4347029	-	Q69NE0; Q761Z4	expressed protein	-	osa:4347029	-	-	-	-	-	-	-	1861.76	0.7527	0.002	0.0004	up			Os.4634.1.S1_at	LOC_Os09g10274.1	Os09g0274900	4346591	LOC4346591	-	Q6H4D3	expressed protein	-	osa:4346591	-	-	-	-	-	-	-	423.214	2.6632	0	0	Down				Os.7905.1.S1_at
Os.6331.1.S1_at	LOC_Os04g44800.1	Os04g0530300	4336481	LOC4336481	-	Q7X8Y1	expressed protein	-	osa:4336481	-	-	-	-	-	-	-	1858.53	0.7931	0.0019	0.0004	up			Os.46584.1.S1_x_at	LOC_Os06g05120.1,LOC_Os01g08300.1,LOC_Os05g08554.1,LOC_Os06g05120.2	Os06g0143100,Os01g0178300,Os05g0178300,Os06g0143100	9268366	LOC9268366	PF12734	Q5VSB6	expressed protein	-	osa:9268366	-	-	-	-	-	-	-	1226.56	1.5247	0	0	Down				Os.7978.1.S1_at
Os.9979.1.S1_at	LOC_Os09g22440.1	Os09g0392000	4346961	LOC4346961	-	Q6H416	expressed protein	-	osa:4346961	-	-	-	-	-	GO:0005739 [Name: mitochondrion]	-	1857.25	0.7359	0.0019	0.0004	up			Os.46617.1.S1_at	LOC_Os10g41560.1	Os10g0565300	4349418	LOC4349418	PF06101	Q336R4	expressed protein	-	osa:4349418	-	-	-	-	-	-	-	286.782	0.3404	0	0	up				Os.38233.1.S2_s_at
Os.11920.1.S1_s_at	LOC_Os04g39320.1,LOC_Os04g39320.2,LOC_Os04g39320.4	Os04g0468600,Os04g0468600,Os04g0468600	4336108	LOC4336108	-	B7E663; Q7XJV6	expressed protein	-	osa:4336108	-	-	-	-	-	-	-	1856.95	0.7944	0.0018	0.0004	up			Os.46685.1.S1_x_at	LOC_Os10g25570.1,LOC_Os10g25570.2,LOC_Os10g25570.3,LOC_Os10g25570.4,LOC_Os10g25570.5	Os10g0395200,Os10g0395200,Os10g0395200,Os10g0395200,Os10g0395200	4348548	LOC4348548	-	Q0IXV7	expressed protein	-	osa:4348548	-	-	-	-	-	-	-	1095.78	1.5614	0	0	Down				Os.11939.1.S1_at
Os.22940.1.S1_at	LOC_Os02g07010.1	Os02g0166600	4328415	-	-	Q6H4W7	expressed protein	-	osa:4328415	-	-	-	-	-	-	-	1870.42	1.1484	0.0018	0.0004	Down			Os.46691.1.A1_x_at	LOC_Os10g22460.1	Os10g0370000	4348468	LOC4348468	PF07228	B9G5E4; Q339D2	expressed protein	-	osa:4348468	-	-	-	-	-	GO:0009536 [Name: plastid]	GO:0046872 [Name: metal ion binding]; GO:0004721 [Name: phosphoprotein phosphatase activity]	937	1.7441	0	0	Down				Os.12316.1.S1_at
Os.33678.1.S1_x_at	LOC_Os08g37720.1,LOC_Os08g37720.2	Os08g0483600,Os08g0483600	4345865	LOC4345865	-	Q6YTU2	expressed protein	-	osa:4345865	-	-	-	-	-	-	-	1865.92	1.4787	0.0017	0.0004	Down			Os.46708.1.S1_at	LOC_Os10g14011.1	Os10g0207400	9268731	-	-	B9G7Y8	expressed protein	-	osa:9268731	-	-	-	-	-	GO:0016021 [Name: integral component of membrane]	-	871.263	0.4784	0	0	up				Os.18539.1.S1_at
Os.17625.1.S1_at	LOC_Os07g41710.2	Os07g0608100	4343865	LOC4343865	-	Q6YSF0	expressed protein	-	osa:4343865	-	-	-	-	-	GO:0009941 [Name: chloroplast envelope]	-	1857.79	1.2058	0.0016	0.0003	Down			Os.4708.1.S1_at	LOC_Os05g08554.1	Os05g0178300	9272110	LOC9272110	PF12734	A6N018; B9FMS2	expressed protein	-	osa:9272110	-	-	-	-	-	GO:0016021 [Name: integral component of membrane]	-	396.151	2.4893	0	0	Down				Os.4697.1.S1_at
Os.27014.1.S1_at	LOC_Os04g58330.1	Os04g0679900	4337425	LOC4337425	PF00335	Q7XKE1	expressed protein	-	osa:4337425	-	-	-	-	-	GO:0016021 [Name: integral component of membrane]	-	1845.54	0.9097	0.0016	0.0003	up			Os.47890.1.S1_s_at	LOC_Os12g36930.1	Os12g0556400	4352497	LOC4352497	-	Q2QNS1	expressed protein	-	osa:4352497	-	-	-	-	-	GO:0016021 [Name: integral component of membrane]	-	1315.95	1.4022	0	0	Down				Os.5263.2.S1_x_at
Os.10129.1.S1_at	LOC_Os04g01540.1	Os04g0105700	4334910	LOC4334910	-	Q84VC9	expressed protein	-	osa:4334910	-	-	-	-	-	GO:0009570 [Name: chloroplast stroma]	-	1851.84	1.3225	0.0015	0.0003	Down			Os.48354.1.S1_at	LOC_Os02g52410.1	Os02g0761600	4330810	LOC4330810	PF14295	Q6Z6H3	expressed protein	-	osa:4330810	-	-	-	-	-	GO:0016021 [Name: integral component of membrane]	-	1319.9	1.3732	0	0	Down				OsAffx.21616.1.S1_s_at
Os.31177.1.S1_at	LOC_Os01g29740.1	Os01g0392100	4325236	LOC4325236	-	Q5VNK5	expressed protein	-	osa:4325236	-	-	-	-	-	GO:0016021 [Name: integral component of membrane]	-	1851.73	1.3406	0.0015	0.0003	Down			Os.4875.1.S1_at	LOC_Os01g69100.1	Os01g0920100	4327740	LOC4327740	-	Q5JJJ8	expressed protein	-	osa:4327740	-	-	-	-	-	-	-	596.684	0.4538	0	0	up				Os.10578.1.A1_at
Os.17721.1.S1_at	LOC_Os09g32030.1	Os09g0493600	4347448	LOC4347448	PF02410	Q0J0L9	expressed protein	-	osa:4347448	-	-	-	-	GO:0017148 [Name: negative regulation of translation]; GO:0090071 [Name: negative regulation of ribosome biogenesis]	GO:0009507 [Name: chloroplast]	GO:0043023 [Name: ribosomal large subunit binding]	1844.13	1.1538	0.0013	0.0003	Down			Os.4876.1.S1_at	LOC_Os05g02250.1	Os05g0113400	4337605	LOC4337605	PF00241	Q0DLA3; Q5KQM3	expressed protein	-	osa:4337605	K05765	-	-	-	GO:0030042 [Name: actin filament depolymerization]	GO:0015629 [Name: actin cytoskeleton]	GO:0003779 [Name: actin binding]	410.925	2.5773	0	0	Down				Os.22614.1.S1_at
Os.6997.2.S1_at	LOC_Os05g23530.1,LOC_Os05g23530.2,LOC_Os05g23530.4	Os05g0300700,Os05g0300700,Os05g0300700	4338347	LOC4338347	PF15612; PF10497	Q0DJC6	expressed protein	-	osa:4338347	-	-	-	-	GO:0006355 [Name: regulation of transcription, DNA-templated]	GO:0005634 [Name: nucleus]	-	1830.24	0.7712	0.0013	0.0003	up			Os.4914.1.S1_s_at	LOC_Os03g51459.1	Os03g0724500	4333956	LOC4333956	-	Q75GV2	expressed protein	-	osa:4333956	-	-	-	-	-	-	-	1133.29	0.5976	0	0	up				Os.37822.3.A1_s_at
Os.45962.1.S1_a_at	LOC_Os07g47030.1,LOC_Os07g47030.2,LOC_Os07g47030.3,LOC_Os07g47030.4,LOC_Os07g47000.1	Os07g0665700,Os07g0665700,Os07g0665700,Os07g0665700,Os07g0665300	4344213	LOC4344213	PF13365	Q0D3U2; B9FUR2; B8B5M5	expressed protein	-	osa:4344213	-	-	-	-	-	-	-	1837.37	1.3594	0.0012	0.0003	Down			Os.49228.1.S1_at	LOC_Os02g30410.1,LOC_Os02g30410.2	Os02g0507400,Os02g0507400	4329441	LOC4329441	PF04359	Q6K2H3	expressed protein	-	osa:4329441	-	-	-	-	-	GO:0005739 [Name: mitochondrion]	-	1271.66	1.5263	0	0	Down				Os.18335.2.S1_x_at
Os.46045.3.S1_x_at	LOC_Os01g15029.1	Os01g0254200	4327710	LOC4327710	-	Q9S7V0	expressed protein	-	osa:4327710	-	-	-	-	-	GO:0016021 [Name: integral component of membrane]	-	1818.41	0.7256	0.0011	0.0002	up			Os.49235.1.S1_at	LOC_Os02g44540.1,LOC_Os02g44540.2,LOC_Os02g44540.3,LOC_Os02g44540.4,LOC_Os02g44540.5,LOC_Os02g44540.6	Os02g0664700,Os02g0664700,Os02g0664700,Os02g0664700,Os02g0664700,Os02g0664700	9267931	LOC9267931	-	B7EAY8; Q6ESI2	expressed protein	-	osa:9267931	-	-	-	-	-	-	-	1239.34	1.4586	0	0	Down				Os.213.1.S1_at
Os.47951.1.S1_at	LOC_Os03g14290.1	Os03g0247100	4332244	LOC4332244	-	Q10P50	expressed protein	-	osa:4332244	-	-	-	-	-	-	-	1820.29	1.6369	0.001	0.0002	Down			Os.49283.1.S1_at	LOC_Os02g15540.1	Os02g0254600	4328909	LOC4328909	-	Q6EN51	expressed protein	-	osa:4328909	-	-	-	-	-	-	-	981.258	1.9638	0	0	Down				Os.10985.1.S1_at
Os.4902.1.S1_at	LOC_Os11g16330.1,LOC_Os11g16330.2,LOC_Os11g16330.4	Os11g0264700,Os11g0264700,Os11g0264700	4350241	LOC4350241	PF04379	Q2R7K1	expressed protein	-	osa:4350241	K10290	-	-	-	-	-	-	1810.45	0.707	0.001	0.0002	up			Os.49742.1.S1_at	LOC_Os08g19210.1	Os08g0289000	4345180	LOC4345180	-	Q6Z2C3; Q6Z2C4	expressed protein	-	osa:4345180	-	-	-	-	-	-	-	907.388	0.4531	0	0	up				Os.11222.1.S1_at
Os.25561.1.S1_at	LOC_Os05g22730.1	Os05g0292800	4338307	LOC4338307	-	Q0DJF5	expressed protein	-	osa:4338307	-	-	-	-	-	GO:0009535 [Name: chloroplast thylakoid membrane]	-	1815.5	1.2497	0.0009	0.0002	Down			Os.50024.1.S1_at	LOC_Os05g12481.1	Os05g0215700	4338115	LOC4338115	-	Q0DJX5	expressed protein	-	osa:4338115	-	-	-	-	-	-	-	781.95	0.4702	0	0	up				Os.16099.1.S1_at
Os.6413.1.S1_a_at	LOC_Os05g06700.1,LOC_Os05g06700.2	Os05g0159100,Os05g0159100	4337877	LOC4337877	PF05832	Q5W723	expressed protein	-	osa:4337877	-	-	-	-	GO:0009306 [Name: protein secretion]; GO:0016192 [Name: vesicle-mediated transport]	GO:0030173 [Name: integral component of Golgi membrane]	-	1815.07	1.4745	0.0009	0.0002	Down			Os.50438.1.S1_at	LOC_Os02g36530.1	Os02g0575000	4329748	LOC4329748	-	Q69S83	expressed protein	-	osa:4329748	-	-	-	-	-	-	-	1167	0.5172	0	0	up				Os.18356.1.S1_x_at
Os.10451.2.S1_at	LOC_Os07g31260.1	None	-	-	-	B8B6G9	expressed protein	-	-	-	-	-	-	-	GO:0016021 [Name: integral component of membrane]	-	1789.74	0.7328	0.0008	0.0001	up			Os.50756.1.S1_at	LOC_Os09g21250.1	Os09g0380200	4346927	LOC4346927	PF11833	Q6H5B0; A3BYC5	expressed protein	-	osa:4346927	-	-	-	-	-	GO:0016021 [Name: integral component of membrane]	-	1368.04	1.3935	0	0	Down				Os.5943.1.S1_at
Os.22838.1.S1_x_at	LOC_Os07g26974.1	Os07g0452700	4343134	LOC4343134	-	Q0D6Q7	expressed protein	-	osa:4343134	-	-	-	-	-	-	-	1807.74	1.3738	0.0008	0.0002	Down			Os.51223.1.S1_at	LOC_Os04g57690.1	Os04g0672900	4337370	LOC4337370	PF10058	Q0J944	expressed protein	-	osa:4337370	-	-	-	-	GO:0071786 [Name: endoplasmic reticulum tubular network organization]	GO:0071782 [Name: endoplasmic reticulum tubular network]; GO:0016021 [Name: integral component of membrane]	-	1381.58	0.5853	0	0	up				Os.7832.1.S1_at
Os.9174.2.S1_x_at	LOC_Os06g51480.1,LOC_Os06g51480.2	Os06g0731400,Os06g0731400	4342155	LOC4342155	-	Q5Z407; Q5Z406	expressed protein	-	osa:4342155	-	-	-	-	-	GO:0016021 [Name: integral component of membrane]	-	1798.91	0.7233	0.0008	0.0002	up			Os.51245.1.S1_at	LOC_Os02g32450.1	Os02g0525100	4329514	LOC4329514	-	Q6H7A9	expressed protein	-	osa:4329514	-	-	-	-	-	-	-	1287.79	0.6074	0	0	up				Os.7945.1.S1_s_at
Os.28404.1.A1_at	LOC_Os03g07190.1	Os03g0168200	4331752	LOC4331752	PF11360	Q8S7U4	expressed protein	-	osa:4331752	-	-	-	-	-	GO:0009536 [Name: plastid]	-	1792.8	0.9484	0.0007	0.0001	Down			Os.51258.1.S1_at	LOC_Os02g03250.1	Os02g0125000	4328146	LOC4328146	-	Q6Z703	expressed protein	-	osa:4328146	-	-	-	-	-	GO:0009534 [Name: chloroplast thylakoid]; GO:0009507 [Name: chloroplast]; GO:0016021 [Name: integral component of membrane]	-	863.138	1.7687	0	0	Down				Os.8496.1.S1_at
Os.13995.1.S1_at	LOC_Os05g34470.1,LOC_Os05g34470.1,LOC_Os05g34470.2,LOC_Os05g34470.2	Os05g0417200,Os05g0417251,Os05g0417200,Os05g0417251	4338807	LOC4338807	-	Q688K6; A2Y4Q4; Q6AT71; Q0DI48	expressed protein	-	osa:4338807	-	-	-	-	GO:0006355 [Name: regulation of transcription, DNA-templated]; GO:0009658 [Name: chloroplast organization]	GO:0009570 [Name: chloroplast stroma]	-	1783.87	1.3021	0.0006	0.0001	Down			Os.5191.1.S1_at	LOC_Os05g04620.1	Os05g0137300	4337743	LOC4337743	-	Q75L36	expressed protein	-	osa:4337743	-	-	-	-	-	-	GO:0010181 [Name: FMN binding]; GO:0051539 [Name: 4 iron, 4 sulfur cluster binding]; GO:0051287 [Name: NAD binding]; GO:0016651 [Name: oxidoreductase activity, acting on NAD(P)H]	982.728	0.5384	0	0	up				Os.9224.1.S1_at
Os.46922.1.S1_at	LOC_Os08g01080.1	Os08g0100800	4344413	LOC4344413	PF12579	Q6Z1Z4	expressed protein	-	osa:4344413	-	-	-	-	-	-	-	1781.34	1.4844	0.0006	0.0001	Down			Os.52371.1.S1_at	LOC_Os01g29830.1,LOC_Os01g29830.2	Os01g0393000,Os01g0393000	9268740	LOC9268740	-	Q5VNK2	expressed protein	-	osa:9268740	-	-	-	-	-	-	-	1228.06	0.7138	0	0	up				Os.37652.2.S1_at
Os.51582.1.S2_at	LOC_Os09g19750.2	Os09g0361700	4346853	LOC4346853	PF05254	Q6K4F7; B7F1Z9	expressed protein	-	osa:4346853	K17968	-	-	-	-	-	-	1781.78	1.2849	0.0006	0.0001	Down			Os.52515.1.S1_at	LOC_Os07g38230.1	Os07g0569600	4343652	LOC4343652	PF02341	Q7XIH6	expressed protein	-	osa:4343652	-	-	-	-	-	GO:0009536 [Name: plastid]	-	993.655	1.5624	0	0	Down				Os.49213.1.S1_at
Os.13573.1.S1_at	LOC_Os08g30930.1	Os08g0400300	4345510	LOC4345510	-	Q6Z2A0	expressed protein	-	osa:4345510	-	-	-	-	-	GO:0016021 [Name: integral component of membrane]	-	1765.79	1.4434	0.0005	0.0001	Down			Os.53103.1.S1_at	LOC_Os05g32970.1	Os05g0397300	4338706	LOC4338706	-	Q75HV7	expressed protein	-	osa:4338706	-	-	-	-	-	-	-	467.662	1.5517	0	0	Down				Os.16704.1.S1_at
Os.16297.1.S1_a_at	LOC_Os03g61570.1,LOC_Os03g61570.2	Os03g0831200,Os03g0831200	4334668	LOC4334668	PF00320	Q10B39; Q850Z5	expressed protein	-	osa:4334668	-	-	-	-	-	-	GO:0043565 [Name: sequence-specific DNA binding]; GO:0008270 [Name: zinc ion binding]; GO:0003700 [Name: transcription factor activity, sequence-specific DNA binding]	1765.06	1.633	0.0005	0.0001	Down			Os.53103.1.S1_x_at	LOC_Os05g32970.1	Os05g0397300	4338706	LOC4338706	-	Q75HV7	expressed protein	-	osa:4338706	-	-	-	-	-	-	-	455.82	1.5733	0	0	Down				Os.27824.1.S1_at
Os.3568.1.S1_at	LOC_Os06g04889.1	Os06g0140900	4340072	-	-	-	expressed protein	-	osa:4340072	-	-	-	-	-	-	-	1770.5	1.585	0.0005	0.0001	Down			Os.53189.1.S1_at	LOC_Os08g07430.1	Os08g0171000	4344772	LOC4344772	-	Q6YYL0	expressed protein	-	osa:4344772	-	-	-	-	-	GO:0016021 [Name: integral component of membrane]	-	1084.14	0.6033	0	0	up				Os.48332.1.A1_s_at
Os.6861.1.S1_at	LOC_Os09g23590.1	Os09g0400700	4346996	LOC4346996	-	Q0J1Z1	expressed protein	-	osa:4346996	-	-	-	-	-	GO:0005739 [Name: mitochondrion]	-	1766.54	0.7328	0.0005	0.0001	up			Os.53275.1.S1_at	LOC_Os05g08420.1,LOC_Os05g08420.2	Os05g0176700,Os05g0176700	4337962	LOC4337962	-	Q6AT22; A6N186	expressed protein	-	osa:4337962	-	-	-	-	-	GO:0009536 [Name: plastid]	-	1130.52	0.525	0	0	up				Os.6252.1.S1_at
Os.20357.1.S1_at	LOC_Os06g05650.1	Os06g0149300	9270964	ACBP2	PF00887	Q5VRM0; Q5VND7	expressed protein	-	osa:4339921	-	-	-	-	-	GO:0005829 [Name: cytosol]	GO:0000062 [Name: fatty-acyl-CoA binding]; GO:0008289 [Name: lipid binding]	1754.62	1.4106	0.0004	0.0001	Down			Os.53705.1.S1_at	LOC_Os06g45060.1	Os06g0661500	4341746	LOC4341746	-	Q651U6	expressed protein	-	osa:4341746	-	-	-	-	-	-	-	503.791	0.3938	0	0	up				OsAffx.27508.54.S1_s_at
Os.4875.1.S1_at	LOC_Os01g69100.1	Os01g0920100	4327740	LOC4327740	-	Q5JJJ8	expressed protein	-	osa:4327740	-	-	-	-	-	-	-	1750.24	1.3071	0.0004	0.0001	Down			Os.54286.1.S1_x_at	LOC_Os08g22852.1	Os08g0318400	4345248	LOC4345248	-	Q69PQ2	expressed protein	-	osa:4345248	-	-	-	-	-	-	-	583.976	1.9586	0	0	Down				Os.12410.1.S1_a_at
Os.54794.1.S1_x_at	LOC_Os11g33050.1	Os11g0536000	4350654	LOC4350654	PF14009	Q6YSF3	expressed protein	-	osa:4343864	-	-	-	-	-	GO:0005634 [Name: nucleus]	GO:0042393 [Name: histone binding]	1753.33	1.2327	0.0004	0.0001	Down			Os.54450.1.S1_s_at	LOC_Os02g48150.1	Os02g0711400	4330497	LOC4330497	-	Q6ZIR5	expressed protein	-	osa:4330497	-	-	-	-	-	-	-	809.874	0.4958	0	0	up				Os.10143.1.S1_at
Os.8469.1.S1_at	LOC_Os09g34140.1,LOC_Os09g34140.2	Os09g0517000,Os09g0517000	4347585	LOC4347585	-	Q0J0C4	expressed protein	-	osa:4347585	-	-	-	-	-	GO:0009534 [Name: chloroplast thylakoid]	-	1757.01	1.3948	0.0004	0.0001	Down			Os.54627.1.S1_at	LOC_Os03g19040.1,LOC_Os05g28840.1	Os03g0302500,Os05g0356800	4332582	LOC4332582	PF12023	Q10MM9	expressed protein	-	osa:4332582	-	-	-	-	-	-	-	1206.52	1.6055	0	0	Down				Os.22514.1.S1_at
Os.8975.1.S1_at	LOC_Os01g28989.1,LOC_Os01g28989.2,LOC_Os01g28989.3,LOC_Os01g28989.4,LOC_Os01g28989.6,LOC_Os01g28989.5	Os01g0386700,Os01g0386700,Os01g0386700,Os01g0386700,Os01g0386700,Os01g0386700	9270533	LOC9270533	-	C7IWU8	expressed protein	-	osa:9270533	-	-	-	-	-	-	-	1749.88	0.6028	0.0004	0.0001	up			Os.55110.1.S1_at	LOC_Os12g43750.1	Os12g0634000	9267813	LOC9267813	-	Q2QLP6	expressed protein	-	osa:9267813	-	-	-	-	-	-	-	1379.16	1.3175	0	0	Down				Os.26572.1.S1_at
OsAffx.24715.1.S1_at	LOC_Os02g44100.1,LOC_Os02g44100.2	Os02g0658300,Os02g0658300	4330209	LOC4330209	-	Q0DYZ0	expressed protein	-	osa:4330209	-	-	-	-	-	GO:0005739 [Name: mitochondrion]	-	1745.95	1.4016	0.0004	0.0001	Down			Os.55270.1.S1_s_at	LOC_Os04g54210.1	Os04g0634800	4337127	LOC4337127	PF12609	Q7XQT1	expressed protein	-	osa:4337127	-	-	-	-	-	-	-	269.599	0.304	0	0	up				Os.49514.1.S1_at
Os.32449.1.S1_at	LOC_Os02g51020.1	Os02g0744000	4330704	LOC4330704	-	Q6Z2U3	expressed protein	-	osa:4330704	-	-	-	-	GO:0009773 [Name: photosynthetic electron transport in photosystem I]	GO:0010598 [Name: NAD(P)H dehydrogenase complex (plastoquinone)]; GO:0009535 [Name: chloroplast thylakoid membrane]	-	1729.19	1.3016	0.0003	0.0001	Down			Os.55283.1.S1_at	LOC_Os05g38660.1	Os05g0461600	4339023	LOC4339023	-	Q6L4Z9	expressed protein	-	osa:4339023	-	-	-	-	-	-	-	109.516	0.161	0	0	up				Os.16119.1.S1_at
Os.49431.1.S1_at	LOC_Os08g37260.1,LOC_Os08g37260.2	Os08g0477600,Os08g0477600	4345834	LOC4345834	PF15803; PF15805	Q6ZJD2	expressed protein	-	osa:4345834	-	-	-	-	GO:0008380 [Name: RNA splicing]	-	-	1736.29	0.6995	0.0003	0	up			Os.55775.1.S1_at	LOC_Os01g68930.1,LOC_Os01g68930.2	Os01g0918100,Os01g0918100	4324358	LOC4324358	-	Q5JLD2	expressed protein	-	osa:4324358	-	-	-	-	GO:0007140 [Name: male meiosis]; GO:0007143 [Name: female meiotic division]	GO:0005634 [Name: nucleus]	-	1298.87	1.4221	0	0	Down				Os.17446.1.S1_at
Os.7261.1.S1_at	LOC_Os03g18440.1	Os03g0295700	4332534	LOC4332534	PF13890	Q10MT9	expressed protein	-	osa:4332534	K18270	-	-	-	GO:0043547 [Name: positive regulation of GTPase activity]	GO:0009507 [Name: chloroplast]	GO:0005096 [Name: GTPase activator activity]	1731.37	0.7137	0.0003	0	up			Os.5592.1.S1_at	LOC_Os02g48710.1	Os02g0718600	4330538	-	-	Q0DY34; Q6ZGX3	expressed protein	-	osa:4330538	-	-	-	-	-	GO:0016021 [Name: integral component of membrane]	-	373.411	0.3205	0	0	up				OsAffx.3952.1.S1_s_at
OsAffx.15019.1.S1_s_at	LOC_Os05g39060.1	Os05g0466700	4339050	LOC4339050	-	Q6I5J1	expressed protein	-	osa:4339050	-	-	-	-	-	-	-	1737.71	0.8079	0.0003	0.0001	up			Os.5936.1.S1_at	LOC_Os06g43870.2	Os06g0646700	4341662	LOC4341662	-	Q67W55	expressed protein	bZIP	osa:4341662	-	-	-	-	-	-	-	655.973	0.3978	0	0	up				Os.10839.1.S1_at
Os.10526.1.S1_a_at	LOC_Os10g35710.1,LOC_Os10g35710.2,LOC_Os10g35710.3,LOC_Os10g35710.4,LOC_Os10g35710.5	Os10g0500600,Os10g0500600,Os10g0500600,Os10g0500600,Os10g0500600	4349033	LOC4349033	-	Q337G4	expressed protein	-	osa:4349033	-	-	-	-	-	-	GO:0003676 [Name: nucleic acid binding]	1713.35	0.8196	0.0002	0	up			Os.5975.1.S2_at	LOC_Os02g58650.1	Os02g0833400	4331268	LOC4331268	PF05542	Q6ESB6	expressed protein	-	osa:4331268	-	-	-	-	-	GO:0005739 [Name: mitochondrion]	-	701.777	1.8414	0	0	Down				Os.15914.1.S1_at
Os.15576.1.S1_at	LOC_Os04g17680.1,LOC_Os04g17680.4,LOC_Os04g24414.1,LOC_Os09g04290.2,LOC_Os09g04290.1	Os04g0250200,Os04g0250200,Os04g0309400,Os09g0129301,Os09g0129301	4335308	-	-	Q0JEK9	expressed protein	-	osa:4335308	-	-	-	-	-	-	-	1724.56	1.3564	0.0002	0	Down			Os.6090.1.S1_a_at	LOC_Os01g12670.1,LOC_Os01g12670.2,LOC_Os01g12670.4,LOC_Os01g12670.5	Os01g0226500,Os01g0226500,Os01g0226500,Os01g0226500	4326744	LOC4326744	PF16021	B8AAY7; Q5NAF5; A2ZQW1	expressed protein	-	osa:4326744	-	-	-	-	-	-	-	1258.74	0.62	0	0	up				Os.27217.1.A1_at
Os.15671.1.A1_at	LOC_Os12g39840.1	Os12g0588900	4352669	LOC4352669	PF10288	Q2QMW0	expressed protein	-	osa:4352669	K14169	osa04122	osa04122 [Pathway Title: Sulfur relay system]	Sulfur relay system	GO:0032447 [Name: protein urmylation]; GO:0002143 [Name: tRNA wobble position uridine thiolation]	GO:0005829 [Name: cytosol]	GO:0000049 [Name: tRNA binding]; GO:0016779 [Name: nucleotidyltransferase activity]; GO:0016783 [Name: sulfurtransferase activity]	1683.72	0.7474	0.0002	0	up			Os.6284.1.S1_at	LOC_Os03g04710.1,LOC_Os03g04710.2	Os03g0140700,Os03g0140700	4331573	LOC4331573	-	Q10RZ6	expressed protein	-	osa:4331573	-	-	-	-	-	-	-	416.177	2.6409	0	0	Down				Os.6211.1.S1_at
Os.18674.1.S1_at	LOC_Os03g04990.1	Os03g0143700	4331592	LOC4331592	PF12552; PF14309	Q10RW7	expressed protein	-	osa:4331592	-	-	-	-	-	-	-	1723.3	1.7196	0.0002	0	Down			Os.6861.1.S1_at	LOC_Os09g23590.1	Os09g0400700	4346996	LOC4346996	-	Q0J1Z1	expressed protein	-	osa:4346996	-	-	-	-	-	GO:0005739 [Name: mitochondrion]	-	115.6	0.1915	0	0	up				Os.5522.1.S1_at
Os.20989.1.S1_at	LOC_Os04g34620.1	Os04g0423700	4335845	LOC4335845	PF14360	Q7X8A2; Q7F937	expressed protein	-	osa:4335845	-	-	-	-	GO:0030148 [Name: sphingolipid biosynthetic process]	GO:0016021 [Name: integral component of membrane]	-	1701.34	1.5631	0.0002	0	Down			Os.7225.1.S1_at	LOC_Os06g05740.1	Os06g0150400	4340145	LOC4340145	-	Q5VML4	expressed protein	-	osa:4340145	-	-	-	-	-	-	-	486.851	1.9213	0	0	Down				Os.10117.1.S1_at
Os.51478.1.S1_at	LOC_Os12g17830.1,LOC_Os12g17830.2	Os12g0276100,Os12g0276100	4351971	LOC4351971	-	Q2QU14	expressed protein	-	osa:4351971	-	-	-	-	-	GO:0016021 [Name: integral component of membrane]	-	1706.32	1.3332	0.0002	0	Down			Os.7309.2.S1_at	LOC_Os12g01360.1,LOC_Os11g01330.1,LOC_Os11g01330.1	Os12g0104300,Os11g0104300,Os11g0104350	4351252	LOC4351252	PF02861	Q2QYW5	expressed protein	-	osa:4351252	-	-	-	-	GO:0019538 [Name: protein metabolic process]	-	-	681.556	2.0478	0	0	Down				Os.11313.1.S1_at
OsAffx.7294.1.S1_at	LOC_Os11g34870.1	Os11g0549900	9272501	LOC9272501	-	B7F9J4; C7J8W8; Q2R2R9	expressed protein	-	osa:9272501	-	-	-	-	-	GO:0016021 [Name: integral component of membrane]	-	1713.95	1.3226	0.0002	0	Down			Os.7343.1.S1_at	LOC_Os07g02710.1	Os07g0118300	4342264	LOC4342264	-	A0A0N7KMU9	expressed protein	-	osa:4342264	-	-	-	-	-	GO:0005774 [Name: vacuolar membrane]; GO:0016021 [Name: integral component of membrane]	-	354.439	0.3516	0	0	up				Os.11412.1.S1_a_at
Os.20810.1.S1_at	LOC_Os01g56300.1	Os01g0769000	4325594	LOC4325594	PF09770	A6N0F4; Q5ZAQ3	expressed protein	-	osa:4325594	K12617	osa03018	osa03018 [Pathway Title: RNA degradation]	RNA degradation	GO:0000290 [Name: deadenylation-dependent decapping of nuclear-transcribed mRNA]; GO:0033962 [Name: cytoplasmic mRNA processing body assembly]	GO:0000932 [Name: P-body]	GO:0003723 [Name: RNA binding]	1632.36	0.7164	0.0001	0	up			Os.7396.2.S1_a_at	LOC_Os02g47580.1	Os02g0704600	4330454	LOC4330454	-	Q6YVI2	expressed protein	-	osa:4330454	-	-	-	-	-	GO:0016021 [Name: integral component of membrane]	-	1142.81	0.5586	0	0	up				Os.11810.2.S1_a_at
Os.23655.1.A1_at	LOC_Os05g27340.1	Os05g0339200	4338464	LOC4338464	PF04525	Q5WMP1	expressed protein	-	osa:4338464	-	-	-	-	-	-	-	1682.81	0.7371	0.0001	0	up			Os.7521.1.S1_at	LOC_Os06g11990.1	Os06g0223800	4340531	LOC4340531	PF00168	Q67UI5	expressed protein	-	osa:4340531	-	-	-	-	-	GO:0005739 [Name: mitochondrion]	-	1362.31	1.3973	0	0	Down				Os.18954.1.S1_at
Os.27458.1.A1_at	LOC_Os08g29615.1,LOC_Os08g16470.1	Os08g0385400,None	9268069	LOC9268069	-	C7J698	expressed protein	-	osa:9268069	-	-	-	-	-	-	-	1629.79	1.0637	0.0001	0	Down			Os.7691.1.S1_s_at	LOC_Os02g33010.1	Os02g0533000	4329554	LOC4329554	-	Q0E0P6	expressed protein	-	osa:4329554	-	-	-	-	-	GO:0009536 [Name: plastid]; GO:0016020 [Name: membrane]	-	863.237	1.8739	0	0	Down				Os.27550.1.S1_at
Os.27473.1.S1_at	LOC_Os07g44320.1	Os07g0637200	4344038	LOC4344038	PF01936	Q7XIX3	expressed protein	-	osa:4344038	-	-	-	-	GO:0010468 [Name: regulation of gene expression]	GO:0005777 [Name: peroxisome]	-	1613.43	0.6887	0.0001	0	up			Os.7800.1.S1_at	LOC_Os01g58620.1	Os01g0800300	4327955	LOC4327955	-	Q8S2H7	expressed protein	-	osa:4327955	-	-	-	-	-	GO:0016021 [Name: integral component of membrane]	-	550.356	0.3675	0	0	up				Os.14407.1.S1_at
Os.37994.2.S1_x_at	LOC_Os01g16550.1	Os01g0271700	9267815	LOC9267815	PF09495	C7IWD7	expressed protein	-	osa:9267815	-	-	-	-	-	-	-	1685.38	1.3113	0.0001	0	Down			Os.7809.1.S1_at	LOC_Os09g19890.1,LOC_Os09g19890.2	Os09g0363500,Os09g0363500	4346860	LOC4346860	-	Q6K4E1	expressed protein	-	osa:4346860	-	-	-	-	-	GO:0016021 [Name: integral component of membrane]	-	955.791	0.5261	0	0	up				Os.22341.1.S1_at
Os.38200.1.S1_at	LOC_Os05g20304.1	Os05g0281400	-	-	-	-	expressed protein	-	-	-	-	-	-	-	-	-	1675.23	1.4516	0.0001	0	Down			Os.8084.1.S1_x_at	LOC_Os05g04150.1,LOC_Os05g04150.2	Os05g0131900,Os05g0131900	9270212	LOC9270212	-	Q65XT4; C7J2J1	expressed protein	-	osa:9270212	-	-	-	-	-	GO:0016021 [Name: integral component of membrane]	-	1206.37	0.6134	0	0	up				Os.28192.1.S1_at
Os.49006.1.S1_at	LOC_Os09g31466.1	Os09g0491692	9267449	LOC9267449	-	B7F3S5	expressed protein	-	osa:9267449	-	-	-	-	-	-	-	1668.62	0.7876	0.0001	0	up			Os.8109.1.S2_a_at	LOC_Os01g64870.1	Os01g0869000	4324926	LOC4324926	PF04842	Q5N950; Q5N951; B8A6Y7	expressed protein	-	osa:4324926	-	-	-	-	-	GO:0016021 [Name: integral component of membrane]	-	1163.15	0.5844	0	0	up				Os.1851.1.S1_at
Os.49280.1.A1_at	LOC_Os07g38664.1	Os07g0574400	-	-	-	-	expressed protein	-	-	-	-	-	-	-	-	-	1602.44	0.7157	0.0001	0	up			Os.8141.1.S1_at	LOC_Os02g05710.1	Os02g0150900	4328314	LOC4328314	PF07800	Q0E3W9	expressed protein	-	osa:4328314	-	-	-	-	-	-	GO:0003676 [Name: nucleic acid binding]	1042	0.5058	0	0	up				Os.40181.1.S1_at
Os.53112.1.S1_at	LOC_Os02g46480.1	Os02g0690200	4330375	LOC4330375	-	Q6ZGY1; B7EII5	expressed protein	-	osa:4330375	-	-	-	-	-	-	-	1611.53	0.7245	0.0001	0	up			Os.8540.1.S1_at	LOC_Os05g01290.1	Os05g0103400	4337541	LOC4337541	PF11820	Q75M30	expressed protein	-	osa:4337541	-	-	-	-	-	GO:0016021 [Name: integral component of membrane]	-	301.823	2.9478	0	0	Down				Os.18818.1.S1_a_at
Os.6534.2.S1_at	LOC_Os02g34470.1	Os02g0549700	4329620	LOC4329620	PF03000	B7EG78; A6N0M5; Q0E0I4	expressed protein	-	osa:4329620	-	-	-	-	-	-	-	1679.74	0.6629	0.0001	0	up			Os.8545.1.S1_at	LOC_Os01g19940.1	Os01g0305200	4323909	LOC4323909	PF04667	Q657U9	expressed protein	-	osa:4323909	-	-	-	-	-	-	-	886.307	0.5317	0	0	up				Os.38399.1.S1_at
Os.7809.1.S1_at	LOC_Os09g19890.1,LOC_Os09g19890.2	Os09g0363500,Os09g0363500	4346860	LOC4346860	-	Q6K4E1	expressed protein	-	osa:4346860	-	-	-	-	-	GO:0016021 [Name: integral component of membrane]	-	1657.34	1.5399	0.0001	0	Down			Os.8637.1.S1_at	LOC_Os11g09350.1,LOC_Os11g09350.1	Os11g0199700,Os11g0199801	4350004	LOC4350004	PF03127; PF00790	Q2R9B5; Q8W2G2	expressed protein	-	osa:4350004	-	-	-	-	GO:0006886 [Name: intracellular protein transport]	GO:0005623 [Name: cell]	-	1243.26	0.5921	0	0	up				Os.7817.1.A1_s_at
Os.8444.1.S1_s_at	LOC_Os04g57700.1,LOC_Os04g57700.2,LOC_Os04g57700.3,LOC_Os04g57700.4	Os04g0673000,Os04g0673000,Os04g0673000,Os04g0673000	4337371	LOC4337371	PF12579	B7EBX1; B7EEU3	expressed protein	-	osa:4337371	-	-	-	-	-	-	-	1674.69	0.8814	0.0001	0	up			Os.8753.2.S1_at	LOC_Os12g22760.1	Os12g0416500	4352072	LOC4352072	PF06320	Q0INP5	expressed protein	-	osa:4352072	-	-	-	-	GO:0016197 [Name: endosomal transport]	GO:0031083 [Name: BLOC-1 complex]	-	852.666	0.5586	0	0	up				Os.8668.1.S1_at
Os.8670.1.S1_at	LOC_Os02g46830.1	Os02g0695600	4330398	LOC4330398	-	Q6YUQ1	expressed protein	-	osa:4330398	-	-	-	-	-	GO:0016021 [Name: integral component of membrane]	-	1612.34	0.8455	0.0001	0	up			Os.8768.1.S1_a_at	LOC_Os02g48630.1	Os02g0717500	4330530	LOC4330530	-	Q6ZGV7	expressed protein	-	osa:4330530	-	-	-	-	-	-	GO:0051213 [Name: dioxygenase activity]	774.537	0.4703	0	0	up				Os.11090.1.S1_at
Os.9807.1.S1_at	LOC_Os04g52300.1	Os04g0612900	4336970	LOC4336970	PF09446	Q0JA73	expressed protein	-	osa:4336970	-	-	-	-	GO:0070072 [Name: vacuolar proton-transporting V-type ATPase complex assembly]	GO:0012507 [Name: ER to Golgi transport vesicle membrane]; GO:0033116 [Name: endoplasmic reticulum-Golgi intermediate compartment membrane]; GO:0016021 [Name: integral component of membrane]; GO:0005789 [Name: endoplasmic reticulum membrane]; GO:0005773 [Name: vacuole]	-	1688.67	1.4701	0.0001	0	Down			Os.8786.1.S1_a_at	LOC_Os05g40270.1,LOC_Os05g40270.12,LOC_Os05g40270.2,LOC_Os05g40270.3,LOC_Os05g40270.4,LOC_Os05g40270.5,LOC_Os05g40270.6,LOC_Os05g40270.7,LOC_Os05g40270.8,LOC_Os05g40270.9	Os05g0481100,Os05g0481100,Os05g0481100,Os05g0481100,Os05g0481100,Os05g0481100,Os05g0481100,Os05g0481100,Os05g0481100,Os05g0481100	9272054	LOC9272054	PF13855; PF08263; PF00069	B7F5L0; B9FJT1; B7EP37; Q5KQI5; B8AZB0	expressed protein	-	osa:9272054	-	-	-	-	-	GO:0016021 [Name: integral component of membrane]	GO:0005524 [Name: ATP binding]; GO:0004674 [Name: protein serine/threonine kinase activity]; GO:0004672 [Name: protein kinase activity]	411.299	2.7382	0	0	Down				Os.11608.1.S1_at
OsAffx.13195.1.S1_at	LOC_Os03g36080.1	Os03g0559700	4333246	LOC4333246	-	Q851B5	expressed protein	-	osa:4333246	-	-	-	-	-	-	-	1656.53	0.7741	0.0001	0	up			Os.9275.1.S1_x_at	LOC_Os02g31070.1,LOC_Os02g31070.2,LOC_Os02g31070.3,LOC_Os02g31070.4	Os02g0515000,Os02g0515000,Os02g0515000,Os02g0515000	4329472	LOC4329472	PF12452	Q6K9D4; Q0E0X2	expressed protein	-	osa:4329472	-	-	-	-	-	-	-	551.065	2.0843	0	0	Down				Os.7740.1.S1_at
Os.10003.1.S1_at	LOC_Os01g13390.1	Os01g0235100	4327776	LOC4327776	-	A6N031	expressed protein	-	osa:4327776	-	-	-	-	-	-	-	1603.96	1.5574	0	0	Down			Os.9283.1.S1_at	LOC_Os02g33070.1	Os02g0533800	4329559	LOC4329559	-	Q6EPY3	expressed protein	-	osa:4329559	-	-	-	-	-	GO:0005747 [Name: mitochondrial respiratory chain complex I]	-	245.785	0.2707	0	0	up				Os.8306.1.S1_at
Os.10085.1.S1_at	LOC_Os04g41700.1,LOC_Os04g41700.2,LOC_Os04g41700.3,LOC_Os04g41700.4,LOC_Os01g64350.1,LOC_Os01g64350.2,LOC_Os08g08586.3,LOC_Os08g08586.1,LOC_Os08g08586.4,LOC_Os08g08586.2	Os04g0494400,Os04g0494400,Os04g0494400,Os04g0494400,Os01g0863166,Os01g0863166,Os08g0184600,Os08g0184600,Os08g0184600,Os08g0184600	4336266	LOC4336266	-	Q0JC36	expressed protein	-	osa:4336266	-	-	-	-	-	-	-	1494.71	1.3364	0	0	Down			Os.9520.1.S1_at	LOC_Os08g08830.1	Os08g0187700	4344833	LOC4344833	PF04818	Q6ZAQ9	expressed protein	-	osa:4344833	K14400	osa03015	osa03015 [Pathway Title: mRNA surveillance pathway]	mRNA surveillance pathway	GO:0006369 [Name: termination of RNA polymerase II transcription]; GO:0006378 [Name: mRNA polyadenylation]	GO:0005737 [Name: cytoplasm]	GO:0003729 [Name: mRNA binding]; GO:0000993 [Name: RNA polymerase II core binding]	1193.13	0.6097	0	0	up				Os.1309.1.S1_at
Os.10099.1.S1_at	LOC_Os03g13870.1	Os03g0242300	4332218	LOC4332218	-	Q10P95	expressed protein	-	osa:4332218	-	-	-	-	-	-	-	714.205	1.9758	0	0	Down			Os.9811.1.S1_at	LOC_Os07g44004.1	Os07g0633800	4344013	LOC4344013	PF05839	Q0D4D3	expressed protein	-	osa:4344013	K12456	osa04120	osa04120 [Pathway Title: Ubiquitin mediated proteolysis]	Ubiquitin mediated proteolysis	-	GO:0005680 [Name: anaphase-promoting complex]	-	1266.42	1.6328	0	0	Down				Os.15732.1.S1_s_at
Os.10136.1.S1_at	LOC_Os05g48630.1,LOC_Os05g48630.2	Os05g0560000,Os05g0560000	4339593	LOC4339593	PF03244	B7E4T5; A2Y7D9; Q0DG05	expressed protein	-	osa:4339593	K02695	osa00195; osa01100	osa01100 [Pathway Title: Metabolic pathways]; osa00195 [Pathway Title: Photosynthesis]	Photosynthesis; Metabolic pathways	GO:0015979 [Name: photosynthesis]	GO:0016021 [Name: integral component of membrane]; GO:0009535 [Name: chloroplast thylakoid membrane]; GO:0009538 [Name: photosystem I reaction center]	-	1609.89	1.3481	0	0	Down			Os.9896.1.S1_at	LOC_Os01g67370.1,LOC_Os01g67370.2,LOC_Os01g67370.3	Os01g0899500,Os01g0899500,Os01g0899500	4325033	LOC4325033	-	Q5N847	expressed protein	-	osa:4325033	-	-	-	-	-	-	-	1237.98	1.5383	0	0	Down				Os.15197.1.S1_at
Os.10212.1.S1_at	LOC_Os01g07750.1	Os01g0172300	4327646	LOC4327646	PF13259	Q942R8	expressed protein	-	osa:4327646	-	-	-	-	-	-	-	1058.58	0.597	0	0	up			Os.9919.1.S1_s_at	LOC_Os12g40840.2,LOC_Os12g40840.3	Os12g0600701,Os12g0600701	9271366	LOC9271366	-	Q2QMK7	expressed protein	-	osa:9271366	-	-	-	-	-	-	-	1180.94	1.6694	0	0	Down				Os.20352.1.S1_at
Os.10383.1.S1_at	LOC_Os07g10300.1,LOC_Os07g10300.2,LOC_Os07g10300.3	Os07g0202900,Os07g0202900,Os07g0202900	4342672	LOC4342672	PF10236	Q0D7X1	expressed protein	-	osa:4342672	K17408	-	-	-	-	GO:0005763 [Name: mitochondrial small ribosomal subunit]	GO:0003735 [Name: structural constituent of ribosome]	940.243	1.2802	0	0	Down			Os.9929.1.S1_at	LOC_Os03g60509.1,LOC_Os03g60509.2	Os03g0819600,Os03g0819600	4334588	LOC4334588	PF02431	Q84T92; A2XNF0; B7E6A0	expressed protein	-	osa:4334588	K01859	osa01100; osa01110; osa00941	osa01100 [Pathway Title: Metabolic pathways]; osa01110 [Pathway Title: Biosynthesis of secondary metabolites]; osa00941 [Pathway Title: Flavonoid biosynthesis]	Flavonoid biosynthesis; Metabolic pathways; Biosynthesis of secondary metabolites	GO:0009813 [Name: flavonoid biosynthetic process]	-	GO:0045430 [Name: chalcone isomerase activity]	853.945	1.7318	0	0	Down				Os.27071.1.S1_at
Os.10495.1.S1_at	LOC_Os02g54080.1,LOC_Os02g54080.2	Os02g0781700,Os02g0781700	4330928	LOC4330928	-	Q84P89; Q6K819	expressed protein	-	osa:4330928	-	-	-	-	-	GO:0009536 [Name: plastid]	-	1534.72	0.6896	0	0	up			Os.9976.1.S1_at	LOC_Os06g33180.2	Os06g0523100	4341173	LOC4341173	-	Q654E3	expressed protein	-	osa:4341173	-	-	-	-	-	-	-	1028.66	1.7611	0	0	Down				Os.8160.1.S1_at
Os.10594.1.S1_at	LOC_Os02g47000.1,LOC_Os02g47000.2,LOC_Os02g47000.3	Os02g0697700,Os02g0697700,Os02g0697700	4330410	LOC4330410	-	Q6Z8F6	expressed protein	-	osa:4330410	-	-	-	-	-	-	-	579.731	2.1087	0	0	Down			Os.9995.1.S1_at	LOC_Os03g16874.1,LOC_Os03g16874.2,LOC_Os03g16874.3	Os03g0276700,Os03g0276700,Os03g0276700	4332415	-	PF16860	Q10NA6	expressed protein	-	osa:4332415	-	-	-	-	GO:0032543 [Name: mitochondrial translation]	GO:0005739 [Name: mitochondrion]	GO:0003735 [Name: structural constituent of ribosome]	1334.55	0.6439	0	0	up				Os.46160.2.S1_at
Os.10672.1.S1_at	LOC_Os03g10080.1,LOC_Os03g10080.3,LOC_Os03g10080.4,LOC_Os03g10080.4,LOC_Os03g10080.5,LOC_Os03g10080.5	Os03g0197000,Os03g0197000,Os03g0197000,Os03g0197050,Os03g0197000,Os03g0197050	4331944	LOC4331944	-	Q10QG8	expressed protein	-	osa:4331944	K11778	osa01110; osa00900	osa00900 [Pathway Title: Terpenoid backbone biosynthesis]; osa01110 [Pathway Title: Biosynthesis of secondary metabolites]	Terpenoid backbone biosynthesis; Biosynthesis of secondary metabolites	GO:0019408 [Name: dolichol biosynthetic process]; GO:0001525 [Name: angiogenesis]	GO:0016021 [Name: integral component of membrane]; GO:1904423 [Name: dehydrodolichyl diphosphate synthase complex]	GO:0016765 [Name: transferase activity, transferring alkyl or aryl (other than methyl) groups]	1196.89	1.5438	0	0	Down			OsAffx.14458.1.S1_x_at	LOC_Os04g57760.1	Os04g0674000	4337376	LOC4337376	-	Q0J938; Q7XQA2	expressed protein	-	osa:4337376	-	-	-	-	-	GO:0009536 [Name: plastid]	-	1168.54	0.5626	0	0	up				Os.51780.1.S1_at
Os.11226.1.S1_at	LOC_Os03g56330.1	Os03g0774600	4334279	LOC4334279	-	Q8H8N9	expressed protein	-	osa:4334279	-	-	-	-	-	-	-	506.808	2.5467	0	0	Down			OsAffx.14474.1.S1_at	LOC_Os04g58890.1	Os04g0685700	9267051	LOC9267051	-	C7J155	expressed protein	-	osa:9267051	-	-	-	-	-	-	-	545.906	0.3882	0	0	up				Os.37238.1.S1_at
Os.11263.1.A1_at	LOC_Os11g17930.1	Os11g0282300	4350281	LOC4350281	PF07939	Q2QVG6; Q0ITA9	expressed protein	-	osa:4351830	-	-	-	-	-	-	-	999.851	0.5468	0	0	up			OsAffx.15019.1.S1_s_at	LOC_Os05g39060.1	Os05g0466700	4339050	LOC4339050	-	Q6I5J1	expressed protein	-	osa:4339050	-	-	-	-	-	-	-	1140.49	0.4958	0	0	up				Os.11501.1.S1_at
Os.11444.1.S1_at	LOC_Os03g15720.1,LOC_Os03g15720.2	Os03g0263700,Os03g0263700	4332336	LOC4332336	PF10961	Q10NP4	expressed protein	-	osa:4332336	-	-	-	-	GO:0032469 [Name: endoplasmic reticulum calcium ion homeostasis]; GO:0006816 [Name: calcium ion transport]	GO:0016021 [Name: integral component of membrane]; GO:0005789 [Name: endoplasmic reticulum membrane]; GO:0005794 [Name: Golgi apparatus]	-	1349.63	1.37	0	0	Down			OsAffx.19033.1.S1_at	LOC_Os11g26890.1,LOC_Os11g26890.2	Os11g0456100,Os11g0456100	4341334	LOC4341334	PF05251; PF05542	A6N0T8; Q2R4Y4; Q5Z647; A6N1M8	expressed protein	-	osa:4341334	-	-	-	-	GO:0006487 [Name: protein N-linked glycosylation]	GO:0016021 [Name: integral component of membrane]; GO:0034998 [Name: oligosaccharyltransferase I complex]	-	1229.18	1.5416	0	0	Down				Os.28109.1.S1_at
Os.11496.1.S1_at	LOC_Os03g48390.1	Os03g0690000	4333773	LOC4333773	PF14705	Q6AVK1	expressed protein	-	osa:4333773	-	-	-	-	GO:0032970 [Name: regulation of actin filament-based process]	-	-	799.866	1.3896	0	0	Down			OsAffx.23593.1.S1_s_at	LOC_Os01g40070.1,LOC_Os02g45610.1	Os01g0582600,None	4324200	LOC4324200	PF13359	Q0JLQ0	expressed protein	-	osa:4324200	-	-	-	-	-	-	-	871.008	0.4336	0	0	up				Os.8142.1.S1_a_at
Os.11704.1.S1_at	LOC_Os03g58090.1	Os03g0795100	4334411	LOC4334411	-	Q6F381	expressed protein	-	osa:4334411	-	-	-	-	GO:0009642 [Name: response to light intensity]	-	-	753.048	2.1197	0	0	Down			OsAffx.24189.1.S1_at	LOC_Os02g10730.1	Os02g0201300	4328649	LOC4328649	PF07491	Q0E300	expressed protein	-	osa:4328649	-	-	-	-	-	GO:0016021 [Name: integral component of membrane]	GO:0004865 [Name: protein serine/threonine phosphatase inhibitor activity]	541.896	0.3852	0	0	up				OsAffx.24066.1.S1_x_at
Os.11917.1.S1_at	LOC_Os06g47970.1	Os06g0694800	4341930	LOC4341930	-	Q5Z8I1	expressed protein	-	osa:4341930	-	-	-	-	GO:0034599 [Name: cellular response to oxidative stress]; GO:0071470 [Name: cellular response to osmotic stress]	GO:0005783 [Name: endoplasmic reticulum]; GO:0016021 [Name: integral component of membrane]	-	331.081	1.7146	0	0	Down			OsAffx.25417.1.S1_s_at	LOC_Os03g38500.1,LOC_Os03g38500.1	Os03g0581650,Os03g0581701	-	-	-	-	expressed protein	-	-	-	-	-	-	-	-	-	848.899	0.5242	0	0	up				Os.11523.1.S1_at
Os.11969.1.S1_at	LOC_Os05g01530.1	Os05g0105800	9266978	LOC9266978	-	Q65XI4	expressed protein	-	osa:9266978	-	-	-	-	-	-	-	1104.2	2.0787	0	0	Down			OsAffx.26496.1.S1_at	LOC_Os04g47130.1	Os04g0558500	4336638	LOC4336638	-	B7F8D0; Q0JB39	expressed protein	-	osa:4336638	-	-	-	-	-	-	-	1338.55	1.4524	0	0	Down				Os.55458.1.S1_at
Os.12115.1.S1_at	LOC_Os06g09900.1,LOC_Os06g09900.1	Os06g0199300,Os06g0199402	107278582	LOC107278582	PF07911	Q69K56	expressed protein	-	osa:107278582	-	-	-	-	-	-	-	1247.45	0.4961	0	0	up			OsAffx.2808.1.S1_s_at	LOC_Os02g30410.1,LOC_Os02g30410.2	Os02g0507400,Os02g0507400	4329441	LOC4329441	PF04359	B8AID5; B9F064; Q6K2H3	expressed protein	-	osa:4329441	-	-	-	-	-	GO:0005739 [Name: mitochondrion]	-	1051.8	1.6581	0	0	Down				Os.12288.1.S1_at
Os.12176.1.S1_at	LOC_Os03g07590.1	Os03g0172100	4331781	LOC4331781	-	Q10R43; P93427	expressed protein	-	osa:4331781	-	-	-	-	-	-	-	347.253	0.2285	0	0	up			OsAffx.28387.1.S1_s_at	LOC_Os07g10420.2,LOC_Os07g10420.1	Os07g0204100,Os07g0204100	4342676	LOC4342676	-	Q0D7W7	expressed protein	-	osa:4342676	-	-	-	-	-	GO:0016021 [Name: integral component of membrane]	-	471.721	0.3831	0	0	up				Os.7085.2.S1_x_at
Os.12180.1.S1_at	LOC_Os05g01300.1	Os05g0103500	4337542	LOC4337542	-	Q0DLG4	expressed protein	-	osa:4337542	-	-	-	-	-	-	-	942.247	1.8027	0	0	Down			OsAffx.4769.1.S1_at	LOC_Os01g15448.1	Os01g0258600	4326235	DPL2; DPL1	-	Q5SMP0; E3WA12; Q10GF8; E3W9W9; Q0JNX8	expressed protein	-	osa:4326235	-	-	-	-	-	GO:0016021 [Name: integral component of membrane]	-	1349.85	1.354	0	0	Down				Os.7192.1.S1_at
Os.12405.1.S1_at	LOC_Os08g44460.1,LOC_Os08g44460.2,LOC_Os08g44460.3	Os08g0558900,Os08g0558900,Os08g0558900	4346312	LOC4346312	PF04568	A6MZA0; Q6YZI5; Q9XIV2	expressed protein	-	osa:4346312	-	-	-	-	GO:0032780 [Name: negative regulation of ATPase activity]	GO:0005739 [Name: mitochondrion]	GO:0042030 [Name: ATPase inhibitor activity]	753.671	1.5445	0	0	Down			Os.11743.1.S1_at	LOC_Os04g52710.1,LOC_Os04g52710.2,LOC_Os04g52710.3	Os04g0617800,Os04g0617800,Os04g0617800	4337007	LOC4337007	PF00475	Q7XTN6	imidazoleglycerol-phosphate dehydratase, putative, expressed	-	osa:4337007	K01693	osa00340; osa01100; osa01110; osa01230	osa01230 [Pathway Title: Biosynthesis of amino acids]; osa00340 [Pathway Title: Histidine metabolism]; osa01100 [Pathway Title: Metabolic pathways]; osa01110 [Pathway Title: Biosynthesis of secondary metabolites]	Biosynthesis of secondary metabolites; Biosynthesis of amino acids; Metabolic pathways; Histidine metabolism	GO:0000105 [Name: histidine biosynthetic process]	GO:0009536 [Name: plastid]	GO:0004424 [Name: imidazoleglycerol-phosphate dehydratase activity]	1829.71	1.2832	0.0099	0.0017	Down				Os.5102.2.S1_at
Os.12629.1.S1_at	LOC_Os01g45914.1	Os01g0647200	-	-	-	A6MZQ3	expressed protein	-	-	-	-	-	-	-	-	-	479.987	2.5174	0	0	Down			Os.9021.1.S1_at	LOC_Os03g22430.1	Os03g0344900	4332811	LOC4332811	PF00574	Q10LK7	OsClp5 - Putative Clp protease homologue, expressed	-	osa:4332811	-	-	-	-	GO:0006515 [Name: misfolded or incompletely synthesized protein catabolic process]	GO:0009570 [Name: chloroplast stroma]; GO:0009579 [Name: thylakoid]; GO:0009368 [Name: endopeptidase Clp complex]; GO:0005739 [Name: mitochondrion]; GO:0009941 [Name: chloroplast envelope]	GO:0051117 [Name: ATPase binding]; GO:0004176 [Name: ATP-dependent peptidase activity]; GO:0004252 [Name: serine-type endopeptidase activity]	1829.34	1.2699	0.0099	0.0017	Down				Os.11705.1.S1_at
Os.12778.1.S2_at	LOC_Os07g42714.1	Os07g0619200	4343924	LOC4343924	PF13202	Q0D4L7	expressed protein	-	osa:4343924	-	-	-	-	-	-	GO:0005509 [Name: calcium ion binding]	738.228	1.8394	0	0	Down			Os.4822.1.S1_at	LOC_Os05g08570.1,LOC_Os05g08570.2,LOC_Os05g08570.3,LOC_Os05g08570.4,LOC_Os05g08570.6	Os05g0178600,Os05g0178600,Os05g0178600,Os05g0178600,Os05g0178600	4337971	LOC4337971	PF02309	Q0DKA9; Q6AT10	OsIAA15 - Auxin-responsive Aux/IAA gene family member, expressed	-	osa:4337971	K14484	osa04075	osa04075 [Pathway Title: Plant hormone signal transduction]	Plant hormone signal transduction	GO:0006355 [Name: regulation of transcription, DNA-templated]; GO:0009734 [Name: auxin-activated signaling pathway]	GO:0005634 [Name: nucleus]	-	1821.73	0.7447	0.0098	0.0015	up				OsAffx.32233.1.S1_x_at
Os.13027.1.S1_at	LOC_Os01g32790.1	Os01g0511200	4324030	LOC4324030	-	Q5QMU6	expressed protein	-	osa:4324030	-	-	-	-	-	GO:0005761 [Name: mitochondrial ribosome]; GO:0005762 [Name: mitochondrial large ribosomal subunit]	-	1506.12	1.2737	0	0	Down			Os.19410.1.S1_at	LOC_Os07g09000.1	Os07g0187700	4342601	LOC4342601	PF00400	Q6Z4F3	WD domain, G-beta repeat domain containing protein, expressed	-	osa:4342601	K14003	osa04141	osa04141 [Pathway Title: Protein processing in endoplasmic reticulum]	Protein processing in endoplasmic reticulum	GO:0003400 [Name: regulation of COPII vesicle coating]; GO:0009306 [Name: protein secretion]	GO:0030176 [Name: integral component of endoplasmic reticulum membrane]	GO:0005096 [Name: GTPase activator activity]; GO:0051020 [Name: GTPase binding]; GO:0005090 [Name: Sar guanyl-nucleotide exchange factor activity]	1820.74	0.6611	0.0097	0.0015	up				Os.11805.1.A1_s_at
Os.13717.1.S1_at	LOC_Os10g15300.1	Os10g0213700	4348287	LOC4348287	-	Q7XG51	expressed protein	-	osa:4348287	-	-	-	-	-	GO:0016021 [Name: integral component of membrane]	-	518.375	1.7369	0	0	Down			Os.7819.1.S1_at	LOC_Os02g29530.1	Os02g0498700	4329416	LOC4329416	PF01501	Q0E125	glycosyl transferase 8 domain containing protein, putative, expressed	-	osa:4329416	K13648	osa00520; osa00500	osa00500 [Pathway Title: Starch and sucrose metabolism]; osa00520 [Pathway Title: Amino sugar and nucleotide sugar metabolism]	Starch and sucrose metabolism; Amino sugar and nucleotide sugar metabolism	GO:0045489 [Name: pectin biosynthetic process]; GO:0071555 [Name: cell wall organization]	GO:0000139 [Name: Golgi membrane]	GO:0047262 [Name: polygalacturonate 4-alpha-galacturonosyltransferase activity]	1828.01	1.2026	0.0097	0.0016	Down				Os.21061.1.S1_at
Os.13783.1.S1_at	LOC_Os02g04860.1	Os02g0141500	4328268	LOC4328268	-	Q6YX77	expressed protein	-	osa:4328268	-	-	-	-	-	-	-	922.878	1.8998	0	0	Down			Os.14909.3.S1_x_at	LOC_Os10g07270.1	Os10g0160000	4348153	LOC4348153	PF00443; PF06337	Q33AW7	ubiquitin carboxyl-terminal hydrolase 5, putative, expressed	-	osa:4348153	K11835	-	-	-	GO:0016579 [Name: protein deubiquitination]; GO:0006511 [Name: ubiquitin-dependent protein catabolic process]	-	GO:0004843 [Name: thiol-dependent ubiquitin-specific protease activity]	1819.77	0.6649	0.0096	0.0015	up				Os.33110.1.S1_at
Os.13854.1.S1_at	LOC_Os09g24590.1	Os09g0412400	4347040	LOC4347040	-	Q6ES43	expressed protein	-	osa:4347040	-	-	-	-	-	GO:0031410 [Name: cytoplasmic vesicle]	-	1430.68	0.9922	0	0	up			Os.7716.1.S1_at	LOC_Os01g61430.1	Os01g0830300	4327428	LOC4327428	PF04438	Q941U9	HIT zinc finger domain containing protein, expressed	-	osa:4327428	-	-	-	-	-	-	-	1819.89	0.7887	0.0096	0.0015	up				Os.17885.1.S1_s_at
Os.14151.1.S1_at	LOC_Os01g49310.1,LOC_Os01g49310.2	Os01g0687300,Os01g0687300	4324116	LOC4324116	-	Q5N7L8	expressed protein	-	osa:4324116	-	-	-	-	GO:0010099 [Name: regulation of photomorphogenesis]	-	-	554.104	0.4013	0	0	up			Os.26770.2.S1_x_at	LOC_Os04g16748.1,LOC_Os10g21238.1,LOC_Os10g38272.1,LOC_Os09g08464.1	None,None,None,None	4335236	-	PF00430	Q0JEM8	ATP synthase B chain, putative, expressed	-	osa:4335236	K02109	osa00195; osa01100; osa00190	osa00195 [Pathway Title: Photosynthesis]; osa01100 [Pathway Title: Metabolic pathways]; osa00190 [Pathway Title: Oxidative phosphorylation]	Photosynthesis; Metabolic pathways; Oxidative phosphorylation	GO:0015986 [Name: ATP synthesis coupled proton transport]	GO:0045263 [Name: proton-transporting ATP synthase complex, coupling factor F(o)]; GO:0016021 [Name: integral component of membrane]	GO:0015078 [Name: hydrogen ion transmembrane transporter activity]	1826.2	1.422	0.0095	0.0016	Down				Os.26455.2.S1_s_at
Os.14248.1.S1_at	LOC_Os03g08250.1	Os03g0180100	4331826	LOC4331826	PF07911	Q8GSJ4	expressed protein	-	osa:4331826	-	-	-	-	-	-	-	163.999	4.0549	0	0	Down			Os.5851.1.S1_at	LOC_Os04g57400.1,LOC_Os04g57410.1	Os04g0669800,Os04g0669900	4337347	LOC4337347	PF01636	Q7XR61	methylthioribose kinase, putative, expressed	-	osa:4337347	K00899	osa01100; osa00270	osa01100 [Pathway Title: Metabolic pathways]; osa00270 [Pathway Title: Cysteine and methionine metabolism]	Cysteine and methionine metabolism; Metabolic pathways	GO:0019509 [Name: L-methionine salvage from methylthioadenosine]	-	GO:0046522 [Name: S-methyl-5-thioribose kinase activity]; GO:0005524 [Name: ATP binding]	1825.48	1.3465	0.0095	0.0016	Down				Os.275.1.S1_at
Os.14261.1.S1_at	LOC_Os03g08810.1	Os03g0187000	4331875	LOC4331875	PF11523	A6N0W9; Q10QR1	expressed protein	-	osa:4331875	-	-	-	-	GO:0017126 [Name: nucleologenesis]	GO:0005634 [Name: nucleus]	-	732.599	1.5105	0	0	Down			Os.7389.1.S1_at	LOC_Os03g51510.1,LOC_Os03g51510.2,LOC_Os03g51510.3	Os03g0725000,Os03g0725000,Os03g0725000	4333960	LOC4333960	PF00347	Q6AU10	ribosomal protein L6, putative, expressed	-	osa:4333960	K02933	osa03010	osa03010 [Pathway Title: Ribosome]	Ribosome	GO:0006412 [Name: translation]	GO:0005840 [Name: ribosome]	GO:0019843 [Name: rRNA binding]; GO:0003735 [Name: structural constituent of ribosome]	1823.75	1.3214	0.0093	0.0016	Down				Os.27546.1.A1_at
Os.14584.1.S1_at	LOC_Os06g36360.4,LOC_Os06g36360.4,LOC_Os06g36360.1,LOC_Os06g36360.1	Os06g0558700,Os06g0558766,Os06g0558700,Os06g0558766	9268632	LOC9268632	PF04926; PF04928; PF01909	Q5G7K1	expressed protein	-	osa:9268632	K14376	osa03015	osa03015 [Pathway Title: mRNA surveillance pathway]	mRNA surveillance pathway	GO:0043631 [Name: RNA polyadenylation]; GO:0031123 [Name: RNA 3'-end processing]	GO:0005634 [Name: nucleus]	GO:0003723 [Name: RNA binding]; GO:0004652 [Name: polynucleotide adenylyltransferase activity]	1547.88	0.616	0	0	up			Os.7689.1.S1_a_at	LOC_Os01g73230.1	Os01g0963300	4324558	LOC4324558	PF09177; PF05739	B8A9L0; Q5JMS0	syntaxin 6, putative, expressed	-	osa:4324558	K08500	osa04130	osa04130 [Pathway Title: SNARE interactions in vesicular transport]	SNARE interactions in vesicular transport	GO:0048193 [Name: Golgi vesicle transport]; GO:0006906 [Name: vesicle fusion]; GO:0048278 [Name: vesicle docking]; GO:0006886 [Name: intracellular protein transport]	GO:0016021 [Name: integral component of membrane]; GO:0012505 [Name: endomembrane system]; GO:0031201 [Name: SNARE complex]	GO:0000149 [Name: SNARE binding]; GO:0005484 [Name: SNAP receptor activity]	1817	0.6965	0.0093	0.0015	up				Os.11773.1.S1_at
Os.15317.1.A1_at	LOC_Os02g31867.1	Os02g0518000	4329483	LOC4329483	-	Q6H4M6	expressed protein	-	osa:4329483	-	-	-	-	-	-	-	1228.66	0.79	0	0	up			Os.6835.1.S1_at	LOC_Os07g40030.1,LOC_Os07g40030.2,LOC_Os07g40030.3	Os07g0589400,Os07g0589400,Os07g0589400	4343770	LOC4343770	PF00400	Q84Z07; Q0D509	WD domain, G-beta repeat domain containing protein, expressed	-	osa:4343770	K14962	osa03015	osa03015 [Pathway Title: mRNA surveillance pathway]	mRNA surveillance pathway	GO:0009827 [Name: plant-type cell wall modification]; GO:0080182 [Name: histone H3-K4 trimethylation]	GO:0005737 [Name: cytoplasm]; GO:0048188 [Name: Set1C/COMPASS complex]	GO:0003682 [Name: chromatin binding]	1815.78	0.6934	0.0092	0.0014	up				Os.18057.1.A1_at
Os.15657.1.S1_at	LOC_Os03g11580.1	Os03g0214900	4332056	LOC4332056	-	Q10Q04	expressed protein	-	osa:4332056	-	-	-	-	-	-	-	1542.94	1.6068	0	0	Down			Os.11114.1.S1_at	LOC_Os01g69080.1	Os01g0919900	4327738	LOC4327738	PF03405	Q8S059	acyl-desaturase, chloroplast precursor, putative, expressed	-	osa:4327738	K03921	osa01040; osa00061; osa01212	osa01040 [Pathway Title: Biosynthesis of unsaturated fatty acids]; osa00061 [Pathway Title: Fatty acid biosynthesis]; osa01212 [Pathway Title: Fatty acid metabolism]	Biosynthesis of unsaturated fatty acids; Fatty acid biosynthesis; Fatty acid metabolism	GO:0006633 [Name: fatty acid biosynthetic process]; GO:0006952 [Name: defense response]; GO:0006631 [Name: fatty acid metabolic process]	GO:0009570 [Name: chloroplast stroma]	GO:0045300 [Name: acyl-[acyl-carrier-protein] desaturase activity]; GO:0046872 [Name: metal ion binding]	1821.2	1.2426	0.0091	0.0015	Down				Os.38849.1.S1_at
Os.15800.1.S1_x_at	LOC_Os09g25410.1,LOC_Os09g25410.2	Os09g0421500,Os09g0421500	4347090	LOC4347090	-	Q69P61	expressed protein	-	osa:4347090	-	-	-	-	-	-	-	959.832	0.5073	0	0	up			Os.16014.1.S1_at	LOC_Os04g47860.1,LOC_Os04g47860.2,LOC_Os04g47860.3,LOC_Os04g47860.4,LOC_Os04g47860.5,LOC_Os04g47860.6	Os04g0566400,Os04g0566400,Os04g0566400,Os04g0566400,Os04g0566400,Os04g0566400	4336689	LOC4336689	PF12171	Q7XUI7; B7EEB7	ZOS4-11 - C2H2 zinc finger protein, expressed	-	osa:4336689	-	-	-	-	-	-	GO:0046872 [Name: metal ion binding]; GO:0003676 [Name: nucleic acid binding]	1820.99	1.2111	0.0091	0.0015	Down				Os.10333.1.S1_at
Os.15853.1.S1_at	LOC_Os02g37610.1	Os02g0588700	4329819	LOC4329819	-	Q6YY45	expressed protein	-	osa:4329819	-	-	-	-	-	-	-	531.19	2.6961	0	0	Down			Os.18086.1.A1_at	LOC_Os02g02424.1,LOC_Os02g02424.2,LOC_Os02g02424.3	Os02g0116000,Os02g0116000,Os02g0116000	4328076	LOC4328076	PF00096	B7EQH7; Q0E4J8	ZOS2-02 - C2H2 zinc finger protein, expressed	C2H2	osa:4328076	K09191	-	-	-	-	-	GO:0003676 [Name: nucleic acid binding]	1820.85	1.3267	0.0091	0.0015	Down				Os.11132.1.S1_s_at
Os.16051.1.S1_at	LOC_Os11g10780.1,LOC_Os11g10780.1	Os11g0213900,Os11g0214001	-	-	PF02902	-	expressed protein	-	-	-	-	-	-	-	-	-	1003.81	0.5924	0	0	up			Os.18694.1.S1_at	LOC_Os07g26700.1	Os07g0449100	4343123	LOC4343123	PF03650	Q7XIT4	UPF0041 domain containing protein, putative, expressed	-	osa:4343123	-	-	-	-	GO:0006850 [Name: mitochondrial pyruvate transport]	GO:0031305 [Name: integral component of mitochondrial inner membrane]	GO:0050833 [Name: pyruvate transmembrane transporter activity]	1821.29	1.2415	0.0091	0.0015	Down				Os.22279.1.S1_at
Os.16105.1.S1_at	LOC_Os10g07450.1,LOC_Os10g07450.2	Os10g0162100,Os10g0162100	-	-	-	Q33AV7	expressed protein	-	osa:9266046	-	-	-	-	-	-	-	87.2247	3.3269	0	0	Down			Os.34481.1.A1_at	LOC_Os02g32504.1,LOC_Os02g32504.2	Os02g0526000,Os02g0526000	4329519	LOC4329519	PF07786	Q6H797	heparan-alpha-glucosaminide N-acetyltransferase, putative, expressed	-	osa:4329519	-	-	-	-	-	GO:0016021 [Name: integral component of membrane]	-	1820.61	1.2481	0.0091	0.0015	Down				Os.5832.1.S1_at
Os.16257.1.S1_at	LOC_Os01g66190.1,LOC_Os01g66190.2	Os01g0885200,Os01g0885200	4324881	LOC4324881	-	Q8S0R7	expressed protein	-	osa:4324881	-	-	-	-	-	GO:0016021 [Name: integral component of membrane]	-	1093.66	0.6864	0	0	up			Os.37832.1.S1_at	LOC_Os03g55560.1,LOC_Os03g55560.2	Os03g0764300,Os03g0764300	4334214	LOC4334214	PF00069	Q10EQ9	STE_MEKK_ste11_MAP3K.15 - STE kinases include homologs to sterile 7, sterile 11 and sterile 20 from yeast, expressed	-	osa:4334214	-	-	-	-	GO:0031098 [Name: stress-activated protein kinase signaling cascade]; GO:0032147 [Name: activation of protein kinase activity]; GO:0023014 [Name: signal transduction by protein phosphorylation]	GO:0005737 [Name: cytoplasm]	GO:0005524 [Name: ATP binding]; GO:0004674 [Name: protein serine/threonine kinase activity]	1814.95	0.7441	0.0091	0.0014	up				Os.33221.1.S1_at
Os.16918.1.S1_at	LOC_Os12g37890.1	Os12g0566500	4352551	LOC4352551	PF10650	Q0IMJ2	expressed protein	-	osa:4352551	-	-	-	-	-	GO:0000178 [Name: exosome (RNase complex)]	GO:0003723 [Name: RNA binding]	1270.8	0.5512	0	0	up			Os.50333.1.S1_at	LOC_Os04g52540.1	Os04g0615700	4336991	LOC4336991	PF08699; PF16486; PF02170; PF02171; PF16488	Q7XTS4	retrotransposon protein, putative, unclassified, expressed	-	osa:4336991	K11593	-	-	-	GO:0031047 [Name: gene silencing by RNA]	-	GO:0003676 [Name: nucleic acid binding]	1821.43	1.1435	0.0091	0.0015	Down				Os.2450.1.S1_a_at
Os.16964.1.S1_x_at	LOC_Os03g61200.1,LOC_Os03g61200.2	Os03g0827500,Os03g0827500	4334647	LOC4334647	PF03105	Q10B79	expressed protein	-	osa:4334647	-	-	-	-	GO:0070417 [Name: cellular response to cold]; GO:0016036 [Name: cellular response to phosphate starvation]	GO:0016020 [Name: membrane]; GO:0005737 [Name: cytoplasm]; GO:0005634 [Name: nucleus]	-	1589.36	0.6769	0	0	up			Os.5514.1.S1_at	LOC_Os04g56740.1	Os04g0663100	4337301	LOC4337301	PF13178	Q7XM17	IQ calmodulin-binding motif family protein, putative, expressed	-	osa:4337301	-	-	-	-	-	-	-	1820.29	1.3102	0.0091	0.0015	Down				Os.44823.1.S1_x_at
Os.17002.1.S1_at	LOC_Os01g26039.1	Os01g0362100	4325812	LOC4325812	PF03982; PF12146	Q5ZC21	expressed protein	-	osa:4325812	-	-	-	-	-	-	GO:0016747 [Name: transferase activity, transferring acyl groups other than amino-acyl groups]	1233.47	0.7599	0	0	up			Os.3064.1.S1_at	LOC_Os03g50440.1	Os03g0712300	4333892	LOC4333892	PF00179	Q9AUQ8; B8AQD1; Q10E03; B9FB63	ubiquitin-conjugating enzyme, putative, expressed	-	osa:4333892	K10704	-	-	-	GO:0070534 [Name: protein K63-linked ubiquitination]; GO:0006301 [Name: postreplication repair]	GO:0005634 [Name: nucleus]	GO:0003677 [Name: DNA binding]; GO:0061631 [Name: ubiquitin conjugating enzyme activity]	1819.94	1.2738	0.009	0.0015	Down				Os.48857.1.S1_a_at
Os.17031.1.S1_at	LOC_Os03g17440.1	Os03g0282800	4332452	LOC4332452	-	Q10N48	expressed protein	-	osa:4332452	-	-	-	-	-	GO:0016021 [Name: integral component of membrane]	-	1529.41	1.4285	0	0	Down			Os.37652.2.S1_at	LOC_Os01g34620.4,LOC_Os01g34620.5,LOC_Os01g34620.6,LOC_Os01g34620.8,LOC_Os01g34620.9	Os01g0530400,Os01g0530400,Os01g0530400,Os01g0530400,Os01g0530400	4327794	LOC4327794	PF00462	B7F5J5; B7EV32; Q0JM76	OsGrx_S15.1 - glutaredoxin subgroup II, expressed	-	osa:4327794	-	-	-	-	GO:0045454 [Name: cell redox homeostasis]	GO:0005623 [Name: cell]; GO:0005759 [Name: mitochondrial matrix]; GO:0005739 [Name: mitochondrion]	GO:0015035 [Name: protein disulfide oxidoreductase activity]; GO:0009055 [Name: electron carrier activity]; GO:0046872 [Name: metal ion binding]; GO:0051537 [Name: 2 iron, 2 sulfur cluster binding]; GO:0015038 [Name: glutathione disulfide oxidoreductase activity]	1813.61	0.8117	0.009	0.0014	up				Os.7638.1.S1_at
Os.17091.1.S1_at	LOC_Os08g41040.1	Os08g0521800	4346075	LOC4346075	PF09366	Q84QR4; A2YX63	expressed protein	-	osa:4346075	-	-	-	-	-	-	-	1381.62	1.5731	0	0	Down			Os.12329.1.S1_at	LOC_Os01g65920.1,LOC_Os01g65920.2	Os01g0881900,Os01g0881900	4324993	LOC4324993	PF13516	Q8RZQ3	F-box/LRR-repeat protein 2, putative, expressed	-	osa:4324993	K03875	osa04120	osa04120 [Pathway Title: Ubiquitin mediated proteolysis]	Ubiquitin mediated proteolysis	GO:0016567 [Name: protein ubiquitination]; GO:0031146 [Name: SCF-dependent proteasomal ubiquitin-dependent protein catabolic process]; GO:0006511 [Name: ubiquitin-dependent protein catabolic process]	GO:0019005 [Name: SCF ubiquitin ligase complex]	-	1812.76	0.6638	0.0089	0.0014	up				OsAffx.13431.1.S1_at
Os.17229.1.S1_at	LOC_Os02g45920.1	Os02g0684300	4330343	LOC4330343	PF09531	Q6ETZ8	expressed protein	-	osa:4330343	K14315	osa03013	osa03013 [Pathway Title: RNA transport]	RNA transport	-	-	-	857.599	0.4428	0	0	up			OsAffx.13323.1.S1_at	LOC_Os03g43360.2	Os03g0632800	9271374	LOC9271374	PF13923	C7IZM4	zinc finger, C3HC4 type domain containing protein, expressed	-	osa:9271374	K16277	-	-	-	-	-	-	1812.09	0.614	0.0089	0.0014	up				Os.11835.4.S1_x_at
Os.17244.1.S1_at	LOC_Os04g41330.1	Os04g0490700	4336244	LOC4336244	-	Q7X8P4	expressed protein	-	osa:4336244	-	-	-	-	-	-	-	1542.49	0.6293	0	0	up			OsAffx.29968.1.S1_s_at	LOC_Os09g21740.1	Os09g0386200	4346948	LOC4346948	PF04564; PF00514	Q6H593	armadillo/beta-catenin repeat family protein, putative, expressed	-	osa:4346948	-	-	-	-	-	GO:0005634 [Name: nucleus]; GO:0005737 [Name: cytoplasm]	GO:0004842 [Name: ubiquitin-protein transferase activity]	1818.17	1.3051	0.0089	0.0015	Down				Os.13534.1.S1_at
Os.17320.1.S2_at	LOC_Os05g13390.1	Os05g0220900	4338129	LOC4338129	-	Q75G50	expressed protein	-	osa:4338129	-	-	-	-	-	GO:0009507 [Name: chloroplast]	-	1526.76	0.7027	0	0	up			Os.17087.1.S1_a_at	LOC_Os04g19684.1,LOC_Os04g19684.2	Os04g0266400,Os04g0266400	4335329	LOC4335329	PF01429	B8ARJ7; B9GDB2; Q7XWP5; B7EB50	methyl-CpG binding domain containing protein, expressed	-	osa:4335329	-	-	-	-	-	GO:0005634 [Name: nucleus]	GO:0003677 [Name: DNA binding]	1816.12	1.4004	0.0088	0.0015	Down				Os.23086.2.S1_at
Os.17489.1.S1_x_at	LOC_Os08g25864.1,LOC_Os06g08884.2,LOC_Os06g08884.1,LOC_Os11g06934.1,LOC_Os11g06934.2,LOC_Os12g01744.1	Os08g0347200,Os06g0188550,Os06g0188550,Os11g0170400,Os11g0170400,Os12g0108200	4345344	-	-	Q0J694	expressed protein	-	osa:4345344	-	-	-	-	-	-	-	996.919	1.4804	0	0	Down			Os.22477.1.S1_at	LOC_Os03g27770.1	Os03g0395000	4333033	LOC4333033	PF01126	Q10K62; U3PTC5	heme oxygenase 2, putative, expressed	-	osa:4333033	-	-	-	-	GO:0010024 [Name: phytochromobilin biosynthetic process]; GO:0006788 [Name: heme oxidation]; GO:0015979 [Name: photosynthesis]	GO:0009507 [Name: chloroplast]	GO:0004392 [Name: heme oxygenase (decyclizing) activity]	1816.04	1.2035	0.0088	0.0015	Down				Os.26978.1.S1_a_at
Os.17506.1.S1_at	LOC_Os10g32680.1,LOC_Os10g32680.2,LOC_Os10g32680.3	Os10g0463800,Os10g0463800,Os10g0463800	4348829	LOC4348829	PF07063	Q337M4	expressed protein	-	osa:4348829	-	-	-	-	-	GO:0005739 [Name: mitochondrion]	-	747.492	0.618	0	0	up			Os.50208.1.S1_at	LOC_Os03g14890.1,LOC_Os03g14890.2	Os03g0253800,Os03g0253800	9272347	LOC9272347	PF08294	Q10NZ2	AGAP008572-PA, putative, expressed	-	osa:9272347	K17796	-	-	-	GO:0090351 [Name: seedling development]; GO:0030150 [Name: protein import into mitochondrial matrix]	GO:0005744 [Name: mitochondrial inner membrane presequence translocase complex]; GO:0016021 [Name: integral component of membrane]	-	1815.81	1.2307	0.0088	0.0015	Down				Os.6592.1.S1_a_at
Os.17728.1.S1_at	LOC_Os02g35860.1	Os02g0566700	4329711	LOC4329711	-	Q6YTI7	expressed protein	-	osa:4329711	-	-	-	-	-	-	-	728.421	0.5121	0	0	up			Os.5666.1.S1_at	LOC_Os02g15580.1,LOC_Os02g15580.3	Os02g0255000,Os02g0255000	4328912	LOC4328912	PF00520; PF00027	B7EQ98; Q0E2B4	cyclic nucleotide-gated ion channel 1, putative, expressed	-	osa:4328912	-	-	-	-	-	GO:0016021 [Name: integral component of membrane]	GO:0005216 [Name: ion channel activity]	1816.05	1.4161	0.0088	0.0015	Down				Os.5564.1.S1_at
Os.17730.1.S1_at	LOC_Os02g40820.1	Os02g0621600	4330015	LOC4330015	-	Q6K9N7	expressed protein	-	osa:4330015	-	-	-	-	-	-	-	836.638	1.696	0	0	Down			Os.11158.1.S1_at	LOC_Os02g17640.1,LOC_Os02g17620.1	Os02g0276400,Os02g0276200	4329006	LOC4329006	PF00857	Q0E230	isochorismatase family protein, putative, expressed	-	osa:4329006	-	-	-	-	-	GO:0005739 [Name: mitochondrion]	GO:0003824 [Name: catalytic activity]	1814.22	1.337	0.0087	0.0014	Down				OsAffx.24819.1.S1_at
Os.17749.1.A1_at	LOC_Os03g55450.1,LOC_Os03g55450.2	Os03g0762700,Os03g0762700	4334203	LOC4334203	PF12767	Q8W5H4	expressed protein	-	osa:4334203	-	-	-	-	GO:0006357 [Name: regulation of transcription from RNA polymerase II promoter]; GO:0043966 [Name: histone H3 acetylation]	GO:0000124 [Name: SAGA complex]	GO:0003713 [Name: transcription coactivator activity]	826.879	0.4372	0	0	up			Os.14124.1.S2_at	LOC_Os01g60660.1,LOC_Os01g60660.2	Os01g0821800,Os01g0821800	4327613	LOC4327613	PF00043; PF01588	Q8RUP8	methionyl-tRNA synthetase, putative, expressed	-	osa:4327613	K15437	-	-	-	GO:0006418 [Name: tRNA aminoacylation for protein translation]	GO:0017101 [Name: aminoacyl-tRNA synthetase multienzyme complex]; GO:0017102 [Name: methionyl glutamyl tRNA synthetase complex]	GO:0000049 [Name: tRNA binding]; GO:0004812 [Name: aminoacyl-tRNA ligase activity]	1815.13	1.3546	0.0087	0.0014	Down				Os.20118.1.A1_s_at
Os.17844.1.S2_at	LOC_Os09g27970.1,LOC_Os09g27970.2,LOC_Os09g27970.3,LOC_Os09g27970.4,LOC_Os09g27970.5,LOC_Os12g13290.1,LOC_Os12g13290.1	Os09g0453100,Os09g0453100,Os09g0453100,Os09g0453100,Os09g0453100,Os12g0235200,Os12g0235300	4347236	LOC4347236	-	Q0J1B0; B7EQF3	expressed protein	-	osa:4347236	-	-	-	-	-	-	-	711.54	1.7475	0	0	Down			Os.4831.1.S1_a_at	LOC_Os02g38210.1	Os02g0595700	9270837	LOC9270837	PF03144; PF03143; PF00009	B8AEQ9; Q6ZI52; Q6ZI53; Q9SEF8	elongation factor Tu, putative, expressed	-	osa:9270837	K02358	-	-	-	GO:0070125 [Name: mitochondrial translational elongation]; GO:0006414 [Name: translational elongation]	GO:0005739 [Name: mitochondrion]	GO:0003924 [Name: GTPase activity]; GO:0005525 [Name: GTP binding]; GO:0003746 [Name: translation elongation factor activity]	1815.43	1.3034	0.0087	0.0015	Down				Os.21786.1.S1_at
Os.17889.1.S1_at	LOC_Os05g46340.1	Os05g0540900	4339469	LOC4339469	PF14364; PF05553	Q5TKQ1	expressed protein	-	osa:4339469	-	-	-	-	-	GO:0016021 [Name: integral component of membrane]	-	748.93	0.5619	0	0	up			Os.53877.1.S1_x_at	LOC_Os11g39670.1,LOC_Os11g39670.2	Os11g0610900,Os11g0610900	4350906	LOC4350906	PF02403; PF00587	Q2R1C1	seryl-tRNA synthetase, putative, expressed	-	osa:4350906	K01875	osa00970	osa00970 [Pathway Title: Aminoacyl-tRNA biosynthesis]	Aminoacyl-tRNA biosynthesis	GO:0048481 [Name: plant ovule development]; GO:0006434 [Name: seryl-tRNA aminoacylation]	GO:0009507 [Name: chloroplast]; GO:0005737 [Name: cytoplasm]; GO:0005739 [Name: mitochondrion]	GO:0004828 [Name: serine-tRNA ligase activity]; GO:0005524 [Name: ATP binding]	1814.62	1.3014	0.0087	0.0014	Down				Os.27564.1.S1_a_at
Os.17911.1.S1_at	LOC_Os03g60740.1	Os03g0822200	4334608	LOC4334608	PF13460	Q852A3	expressed protein	-	osa:4334608	-	-	-	-	-	GO:0009507 [Name: chloroplast]	-	1317.17	1.447	0	0	Down			Os.9768.1.S1_a_at	LOC_Os02g57410.1,LOC_Os02g57410.10,LOC_Os02g57410.2,LOC_Os02g57410.3,LOC_Os02g57410.4,LOC_Os02g57410.5,LOC_Os02g57410.6,LOC_Os02g57410.7,LOC_Os02g57410.8,LOC_Os02g57410.9	Os02g0819500,Os02g0819500,Os02g0819500,Os02g0819500,Os02g0819500,Os02g0819500,Os02g0819500,Os02g0819500,Os02g0819500,Os02g0819500	4331162	LOC4331162	PF02338	Q6K721; Q6K722	OTU-like cysteine protease family protein, putative, expressed	-	osa:4331162	-	-	-	-	GO:0016579 [Name: protein deubiquitination]	-	GO:0008233 [Name: peptidase activity]; GO:0004843 [Name: thiol-dependent ubiquitin-specific protease activity]	1814.4	1.0567	0.0087	0.0014	Down				Os.7028.1.S1_at
Os.18111.1.S1_at	LOC_Os08g16930.1,LOC_Os08g16930.2	Os08g0270800,Os08g0270800	4345139	LOC4345139	-	B7ECR4; Q6YX04	expressed protein	-	osa:4345139	-	-	-	-	-	-	-	1429.92	0.7041	0	0	up			Os.22570.1.S1_at	LOC_Os08g29530.1,LOC_Os08g29530.2	Os08g0384100,Os08g0384100	4345448	LOC4345448	PF00035	I2DBG4; Q6YW64	double-stranded RNA binding motif containing protein, expressed	-	osa:4345448	-	-	-	-	GO:0030422 [Name: production of siRNA involved in RNA interference]; GO:0006396 [Name: RNA processing]; GO:0031053 [Name: primary miRNA processing]; GO:0031054 [Name: pre-miRNA processing]	GO:0005634 [Name: nucleus]	GO:0003723 [Name: RNA binding]; GO:0003725 [Name: double-stranded RNA binding]; GO:0004525 [Name: ribonuclease III activity]	1809.33	0.7481	0.0086	0.0013	up				OsAffx.6446.1.S1_at
Os.18248.1.S1_at	LOC_Os03g08000.1	Os03g0177300	4331809	LOC4331809	PF12483	Q10R01	expressed protein	-	osa:4331809	K15688	-	-	-	GO:0006996 [Name: organelle organization]	GO:0009941 [Name: chloroplast envelope]; GO:0016021 [Name: integral component of membrane]	GO:0004842 [Name: ubiquitin-protein transferase activity]	927.26	0.579	0	0	up			Os.4833.1.S1_at	LOC_Os02g44500.1	Os02g0664000	4330235	LOC4330235	PF00255	Q6ESJ0	glutathione peroxidase, putative, expressed	-	osa:4330235	K00432	osa00590; osa00480	osa00480 [Pathway Title: Glutathione metabolism]; osa00590 [Pathway Title: Arachidonic acid metabolism]	Arachidonic acid metabolism; Glutathione metabolism	GO:2000280 [Name: regulation of root development]; GO:0048831 [Name: regulation of shoot system development]; GO:0006979 [Name: response to oxidative stress]	GO:0005829 [Name: cytosol]	GO:0004601 [Name: peroxidase activity]; GO:0004602 [Name: glutathione peroxidase activity]	1809.17	0.6436	0.0086	0.0013	up				Os.12029.1.S1_a_at
Os.18307.1.S1_at	LOC_Os07g38950.1,LOC_Os07g07820.1	Os07g0577500,Os07g0174700	4343708	LOC4343708	-	Q6ZL96	expressed protein	-	osa:4343708	-	-	-	-	-	-	-	1350.12	0.7919	0	0	up			Os.9943.5.S1_s_at	LOC_Os01g49529.1,LOC_Os01g49529.2,LOC_Os01g49529.3	Os01g0689900,Os01g0689900,Os01g0689900	4327947	LOC4327947	PF00069; PF14380; PF13947	A2WTY6; Q5N7Q6; Q5N7Q8; B7EC46; Q5N7Q7	OsWAK10d - OsWAK receptor-like cytoplasmic kinase OsWAK-RLCK, expressed	-	osa:107278573; osa:4327947	-	-	-	-	-	GO:0016021 [Name: integral component of membrane]; GO:0005886 [Name: plasma membrane]	GO:0004672 [Name: protein kinase activity]; GO:0005524 [Name: ATP binding]; GO:0016301 [Name: kinase activity]; GO:0030247 [Name: polysaccharide binding]; GO:0004674 [Name: protein serine/threonine kinase activity]	1813.75	1.4292	0.0086	0.0014	Down				Os.12230.1.S1_a_at
Os.18644.1.S1_at	LOC_Os11g13880.1	Os11g0242700	4350175	LOC4350175	PF00504	Q53N84	expressed protein	-	osa:4350175	-	-	-	-	-	GO:0016021 [Name: integral component of membrane]	-	1529.5	1.6521	0	0	Down			Os.10975.1.S1_at	LOC_Os11g39020.1	Os11g0603200	4350873	LOC4350873	PF00005; PF12848	Q2R1J1	ABC transporter, ATP-binding protein, putative, expressed	-	osa:4350873	-	-	-	-	-	GO:0009536 [Name: plastid]	GO:0005524 [Name: ATP binding]; GO:0016887 [Name: ATPase activity]	1811.6	1.2171	0.0085	0.0014	Down				Os.6270.1.S1_at
Os.1880.2.S1_a_at	LOC_Os01g50840.1	Os01g0704300	4324251	LOC4324251	-	Q5N9R9	expressed protein	-	osa:4324251	-	-	-	-	-	-	-	581.56	1.6113	0	0	Down			OsAffx.17373.1.S1_at	LOC_Os08g37140.1	Os08g0476400	9270925	LOC9270925	PF00300	B8BBV1; B7F8I1; C7J5G9	phosphoglycerate mutase, putative, expressed	-	osa:9270925	K15634	osa00010; osa01130; osa00260; osa01100; osa01230; osa01110; osa01200	osa01110 [Pathway Title: Biosynthesis of secondary metabolites]; osa01130 [Pathway Title: Biosynthesis of antibiotics]; osa00260 [Pathway Title: Glycine, serine and threonine metabolism]; osa01100 [Pathway Title: Metabolic pathways]; osa01200 [Pathway Title: Carbon metabolism]; osa01230 [Pathway Title: Biosynthesis of amino acids]; osa00010 [Pathway Title: Glycolysis / Gluconeogenesis]	Glycolysis / Gluconeogenesis; Biosynthesis of amino acids; Metabolic pathways; Glycine, serine and threonine metabolism; Biosynthesis of secondary metabolites; Biosynthesis of antibiotics; Carbon metabolism	-	-	GO:0003824 [Name: catalytic activity]; GO:0016791 [Name: phosphatase activity]	1807.4	0.7278	0.0085	0.0013	up				OsAffx.5891.1.S1_s_at
Os.18850.1.S1_at	LOC_Os10g30870.1	Os10g0445600	4348745	LOC4348745	PF18579	Q7XDY9	expressed protein	-	osa:4348745	-	-	-	-	-	GO:0009507 [Name: chloroplast]	-	1002.65	1.4906	0	0	Down			Os.10761.1.S1_at	LOC_Os03g17740.1	Os03g0286300	4332478	LOC4332478	PF03151	Q8GZZ6	transporter, putative, expressed	-	osa:4332478	-	-	-	-	-	GO:0005794 [Name: Golgi apparatus]; GO:0016021 [Name: integral component of membrane]	GO:0022857 [Name: transmembrane transporter activity]; GO:0015297 [Name: antiporter activity]; GO:0015165 [Name: pyrimidine nucleotide-sugar transmembrane transporter activity]	1810.86	1.2728	0.0084	0.0014	Down				OsAffx.14605.1.S1_at
Os.19183.1.S1_at	LOC_Os01g05064.1	Os01g0143900	4325463	-	-	Q5ZBM5	expressed protein	-	osa:4325463	-	-	-	-	-	-	-	1363.44	1.3149	0	0	Down			Os.23191.1.S1_at	LOC_Os09g20660.1,LOC_Os09g20660.2,LOC_Os09g20660.3	Os09g0373000,Os09g0373000,Os09g0373000	4346901	LOC4346901	PF03650	Q6H4I2	UPF0041 domain containing protein, putative, expressed	-	osa:4346901	-	-	-	-	GO:0006850 [Name: mitochondrial pyruvate transport]	GO:0031305 [Name: integral component of mitochondrial inner membrane]	GO:0050833 [Name: pyruvate transmembrane transporter activity]	1810.54	1.3627	0.0084	0.0014	Down				Os.12035.1.S1_at
Os.19340.1.S1_at	LOC_Os07g01720.1	Os07g0107900	4342206	LOC4342206	-	Q8H3W7	expressed protein	-	osa:4342206	-	-	-	-	-	GO:0009536 [Name: plastid]	-	1287.51	1.8793	0	0	Down			OsAffx.2262.1.S1_x_at	LOC_Os01g46926.1,LOC_Os01g46926.2	Os01g0658400,Os01g0658400	4327162	LOC4327162	PF00179	Q2WEA9; B8A6V8; Q8S920	ubiquitin-conjugating enzyme, putative, expressed	-	osa:4327162	K06689	osa04141; osa04120	osa04120 [Pathway Title: Ubiquitin mediated proteolysis]; osa04141 [Pathway Title: Protein processing in endoplasmic reticulum]	Ubiquitin mediated proteolysis; Protein processing in endoplasmic reticulum	GO:0016567 [Name: protein ubiquitination]	-	GO:0005524 [Name: ATP binding]; GO:0016740 [Name: transferase activity]; GO:0004842 [Name: ubiquitin-protein transferase activity]; GO:0061631 [Name: ubiquitin conjugating enzyme activity]	1810.79	1.1075	0.0084	0.0014	Down				Os.12802.1.S1_at
Os.19378.1.S1_at	LOC_Os02g18940.1	Os02g0291500	4329061	LOC4329061	-	Q6K869	expressed protein	-	osa:4329061	-	-	-	-	-	-	-	1607.38	1.1724	0	0	Down			Os.12014.1.S1_s_at	LOC_Os05g44922.1,LOC_Os05g44922.2	Os05g0524400,Os05g0524400	4339369	LOC4339369	PF00365	Q65X97	6-phosphofructokinase, putative, expressed	-	osa:4339369	K00850	osa01110; osa00030; osa01230; osa01100; osa01200; osa03018; osa00052; osa00051; osa00010; osa01130	osa00010 [Pathway Title: Glycolysis / Gluconeogenesis]; osa00051 [Pathway Title: Fructose and mannose metabolism]; osa00030 [Pathway Title: Pentose phosphate pathway]; osa01100 [Pathway Title: Metabolic pathways]; osa01200 [Pathway Title: Carbon metabolism]; osa01130 [Pathway Title: Biosynthesis of antibiotics]; osa03018 [Pathway Title: RNA degradation]; osa00052 [Pathway Title: Galactose metabol…	Glycolysis / Gluconeogenesis; Pentose phosphate pathway; Biosynthesis of secondary metabolites; Biosynthesis of antibiotics; Carbon metabolism; Fructose and mannose metabolism; RNA degradation; Metabolic pathways; Galactose metabolism; Biosynthesis of amino acids	GO:0006002 [Name: fructose 6-phosphate metabolic process]	GO:0005737 [Name: cytoplasm]	GO:0005524 [Name: ATP binding]; GO:0003872 [Name: 6-phosphofructokinase activity]; GO:0046872 [Name: metal ion binding]	1803.13	0.7819	0.0082	0.0013	up				Os.14852.1.A1_at
Os.19817.1.S1_at	LOC_Os03g21370.1	Os03g0331600	4332730	LOC4332730	PF10674	Q10LX5	expressed protein	-	osa:4332730	-	-	-	-	-	GO:0009536 [Name: plastid]	-	1518.64	1.3938	0	0	Down			Os.3627.1.S1_a_at	LOC_Os01g13170.1	Os01g0232500	4324280	LOC4324280	PF00179	Q5NAY5	ubiquitin-conjugating enzyme E2, putative, expressed	-	osa:4324280	K10581	osa04120	osa04120 [Pathway Title: Ubiquitin mediated proteolysis]	Ubiquitin mediated proteolysis	-	-	GO:0061631 [Name: ubiquitin conjugating enzyme activity]	1804.08	0.6767	0.0082	0.0013	up				Os.3441.1.S1_s_at
Os.1993.1.S1_at	LOC_Os01g53730.1	Os01g0739500	4327202	LOC4327202	-	Q94JH8	expressed protein	-	osa:4327202	-	-	-	-	-	-	-	40.6037	0.0851	0	0	up			Os.3895.1.S1_at	LOC_Os05g02940.1,LOC_Os05g02940.2	Os05g0120700,Os05g0120700	4337647	LOC4337647	PF00689	B7E7X8; Q0DL67	calcium-transporting ATPase 2, endoplasmic reticulum-type, putative, expressed	-	osa:4337647	-	-	-	-	-	GO:0016021 [Name: integral component of membrane]; GO:0005783 [Name: endoplasmic reticulum]	GO:0008553 [Name: hydrogen-exporting ATPase activity, phosphorylative mechanism]	1809.02	1.1385	0.0082	0.0014	Down				Os.6647.1.S1_a_at
Os.20246.1.S1_at	LOC_Os10g32444.1	Os10g0462200	4348818	LOC4348818	-	Q8LNQ3	expressed protein	-	osa:4348818	-	-	-	-	-	-	-	712.061	0.5911	0	0	up			Os.11312.1.S1_s_at	LOC_Os10g26730.1,LOC_Os10g26730.2	Os10g0407500,Os10g0407500	4348592	LOC4348592	PF00929	Q0IXT1	exonuclease, putative, expressed	-	osa:4348592	-	-	-	-	-	-	GO:0003676 [Name: nucleic acid binding]	1802.97	0.7018	0.0081	0.0013	up				Os.10814.1.S1_a_at
Os.20299.1.S1_at	LOC_Os07g45195.1	Os07g0646300	4344101	P0503D09.116-1	-	Q7EYL6	expressed protein	-	osa:4344101	-	-	-	-	-	-	-	679.611	1.575	0	0	Down			Os.12246.1.S1_at	LOC_Os07g44650.1	Os07g0640100	4344058	LOC4344058	PF13649	Q8GS72	LYR motif containing protein, putative, expressed	-	osa:4344058	K03950	osa01100; osa00190	osa00190 [Pathway Title: Oxidative phosphorylation]; osa01100 [Pathway Title: Metabolic pathways]	Oxidative phosphorylation; Metabolic pathways	GO:0006979 [Name: response to oxidative stress]	GO:0005747 [Name: mitochondrial respiratory chain complex I]	-	1807.53	1.369	0.0081	0.0013	Down				Os.14676.2.S1_at
Os.20350.1.S1_at	LOC_Os10g03550.1,LOC_Os10g03550.2,LOC_Os10g03550.3	Os10g0124100,Os10g0124100,Os10g0124100	4348008	LOC4348008	-	Q10A65; Q7G607; A2Z4N1	expressed protein	-	osa:4348008	-	-	-	-	-	-	-	162.31	0.2013	0	0	up			Os.14676.2.S1_at	LOC_Os06g09570.1	Os06g0195900	4340389	LOC4340389	PF08155	Q0DDV9	nucleolar GTP-binding protein 1, putative, expressed	-	osa:4340389	K06943	osa03008	osa03008 [Pathway Title: Ribosome biogenesis in eukaryotes]	Ribosome biogenesis in eukaryotes	-	GO:0005730 [Name: nucleolus]	-	1802.32	0.906	0.0081	0.0013	up				Os.23844.1.A1_at
Os.20502.1.S1_x_at	LOC_Os05g01210.1,LOC_Os05g01210.2,LOC_Os05g01210.3	Os05g0102500,Os05g0102500,Os05g0102500	4337532	LOC4337532	-	Q9FW26	expressed protein	-	osa:4337532	-	-	-	-	-	-	-	1507.99	1.9724	0	0	Down			Os.24773.1.S1_at	LOC_Os04g33300.1	Os04g0405800	4335753	LOC4335753	PF00696	Q0JDG0	amino acid kinase, putative, expressed	-	osa:4335753	-	-	-	-	GO:0006221 [Name: pyrimidine nucleotide biosynthetic process]	GO:0005737 [Name: cytoplasm]	GO:0033862 [Name: UMP kinase activity]	1800.79	0.6652	0.008	0.0012	up				Os.27860.1.A1_at
Os.20575.1.S1_at	LOC_Os03g62240.1	Os03g0838900	4334719	LOC4334719	PF02536	Q851N3	expressed protein	-	osa:4334719	-	-	-	-	GO:0006355 [Name: regulation of transcription, DNA-templated]; GO:0032502 [Name: developmental process]	GO:0042646 [Name: plastid nucleoid]; GO:0009507 [Name: chloroplast]	GO:0003690 [Name: double-stranded DNA binding]	1460.78	1.5071	0	0	Down			Os.2218.1.S1_at	LOC_Os12g05260.1	Os12g0147800	4351500	LOC4351500	PF06404	Q0IQ41; O81277	phytosulfokines precursor, putative, expressed	-	osa:4351500	-	-	-	-	GO:0008283 [Name: cell proliferation]; GO:0007275 [Name: multicellular organism development]; GO:0030154 [Name: cell differentiation]	GO:0005576 [Name: extracellular region]	GO:0008083 [Name: growth factor activity]	1800.67	0.6961	0.0079	0.0012	up				Os.52742.1.S1_at
Os.20998.1.S1_at	LOC_Os06g10109.1	Os06g0202300	4340417	LOC4340417	-	A6MZI8; Q69SR5	expressed protein	-	osa:4340417	-	-	-	-	-	-	-	1038.89	1.5543	0	0	Down			Os.27293.1.S1_at	LOC_Os07g36600.1,LOC_Os07g36600.2	Os07g0551400,Os07g0551400	4343550	LOC4343550	PF00582	Q84S20; Q7XHV1	universal stress protein domain containing protein, putative, expressed	-	osa:4343550	-	-	-	-	-	-	-	1799.67	0.6632	0.0079	0.0012	up				Os.11900.1.S1_at
Os.22560.1.A1_s_at	LOC_Os05g07640.1	Os05g0168400	4337923	LOC4337923	-	Q60DU1	expressed protein	-	osa:4337923	-	-	-	-	GO:0006979 [Name: response to oxidative stress]; GO:0009555 [Name: pollen development]	GO:0016021 [Name: integral component of membrane]; GO:0005886 [Name: plasma membrane]	-	981.512	1.6988	0	0	Down			Os.3445.1.S1_at	LOC_Os11g47809.1	Os11g0704500	4351213	LOC4351213	PF01439	B9G8W2; A2ZH20; P0C5B3; B2ZSV7	metallothionein, putative, expressed	-	osa:4351213	-	-	-	-	-	-	GO:0046872 [Name: metal ion binding]	1799.94	0.7839	0.0079	0.0012	up				Os.1438.1.S1_at
Os.22793.1.S1_at	LOC_Os11g07940.1	Os11g0181900	4349946	LOC4349946	-	Q2R9Q5; B9G9Q5	expressed protein	-	osa:4349946	-	-	-	-	-	GO:0016021 [Name: integral component of membrane]	-	505.945	0.5494	0	0	up			Os.38065.1.S1_at	LOC_Os01g03030.1,LOC_Os01g03030.2	Os01g0120400,Os01g0120400	4326034	LOC4326034	PF01411; PF07973	Q5ZDT9	alanyl-tRNA synthetase, putative, expressed	-	osa:4326034	-	-	-	-	GO:0006419 [Name: alanyl-tRNA aminoacylation]; GO:0006450 [Name: regulation of translational fidelity]	-	GO:0005524 [Name: ATP binding]; GO:0002196 [Name: Ser-tRNA(Ala) hydrolase activity]; GO:0003676 [Name: nucleic acid binding]; GO:0004813 [Name: alanine-tRNA ligase activity]	1800.32	0.702	0.0079	0.0012	up				Os.14848.1.S1_at
Os.23052.1.S1_at	LOC_Os02g46473.1	Os02g0690000	4330373	-	-	Q6ZGY2	expressed protein	-	osa:4330373	-	-	-	-	-	-	-	848.546	0.5925	0	0	up			Os.8241.1.S1_at	LOC_Os04g24140.1	Os04g0306400	4335430	LOC4335430	PF06026	A6N010; Q7XVP0	ribose-5-phosphate isomerase A, putative, expressed	-	osa:4335430	K01807	osa00710; osa01110; osa01200; osa01230; osa00030; osa01100; osa01130	osa01130 [Pathway Title: Biosynthesis of antibiotics]; osa01110 [Pathway Title: Biosynthesis of secondary metabolites]; osa01230 [Pathway Title: Biosynthesis of amino acids]; osa00030 [Pathway Title: Pentose phosphate pathway]; osa01200 [Pathway Title: Carbon metabolism]; osa00710 [Pathway Title: Carbon fixation in photosynthetic organisms]; osa01100 [Pathway Title: Metabolic pathways]	Pentose phosphate pathway; Biosynthesis of amino acids; Biosynthesis of secondary metabolites; Carbon metabolism; Metabolic pathways; Biosynthesis of antibiotics; Carbon fixation in photosynthetic organisms	GO:0009052 [Name: pentose-phosphate shunt, non-oxidative branch]	GO:0009536 [Name: plastid]	GO:0004751 [Name: ribose-5-phosphate isomerase activity]	1799.35	0.7902	0.0079	0.0012	up				Os.11820.1.S2_at
Os.23065.1.S1_at	LOC_Os03g07870.1	Os03g0174800	-	-	-	B7EG04	expressed protein	-	-	-	-	-	-	-	-	-	1178.29	1.7332	0	0	Down			Os.11843.1.S1_at	LOC_Os04g49110.1	Os04g0580300	4336759	LOC4336759	PF03514	Q7X7C0	GRAS family transcription factor domain containing protein, expressed	GRAS	osa:4336759	-	-	-	-	-	GO:0005634 [Name: nucleus]	GO:0003700 [Name: transcription factor activity, sequence-specific DNA binding]; GO:0043565 [Name: sequence-specific DNA binding]	1797.93	0.745	0.0078	0.0012	up				Os.5480.1.S1_at
Os.23113.1.S1_at	LOC_Os04g34610.1	Os04g0423600	4335844	LOC4335844	PF00856	Q0JD76	expressed protein	-	osa:4335844	K11426	-	-	-	-	GO:0009536 [Name: plastid]	-	1256.22	1.3694	0	0	Down			Os.6263.1.S1_at	LOC_Os02g03280.2,LOC_Os02g03280.3	Os02g0125300,Os02g0125300	4328149	LOC4328149	PF01027	A6MZW1; Q0E4C9; Q9MBD8	transmembrane BAX inhibitor motif-containing protein, putative, expressed	-	osa:4328149	-	-	-	-	GO:0043066 [Name: negative regulation of apoptotic process]	GO:0016021 [Name: integral component of membrane]	-	1798.21	0.786	0.0078	0.0012	up				Os.9686.1.S1_at
Os.23161.2.S1_x_at	LOC_Os08g33380.1,LOC_Os08g33380.2	Os08g0430600,Os08g0430600	4345635	LOC4345635	PF14159	Q6ZKB9	expressed protein	-	osa:4345635	-	-	-	-	-	GO:0016021 [Name: integral component of membrane]; GO:0009535 [Name: chloroplast thylakoid membrane]	-	1071.56	1.388	0	0	Down			Os.28087.1.S1_s_at	LOC_Os10g39440.1,LOC_Os10g39440.2	Os10g0539900,Os10g0539900	4349251	LOC4349251	PF00083	Q336W8	transporter family protein, putative, expressed	-	osa:4349251	-	-	-	-	GO:0008643 [Name: carbohydrate transport]	GO:0005887 [Name: integral component of plasma membrane]	GO:0005366 [Name: myo-inositol:proton symporter activity]	1802.65	1.4058	0.0077	0.0013	Down				Os.11629.1.S1_at
Os.23550.1.S1_at	LOC_Os02g58280.1	Os02g0829600	9267029	LOC9267029	PF00753	C7IY67; B7EBH5; B8ACT7; Q6K9T7	expressed protein	-	osa:9267029	-	-	-	-	-	-	-	1312.93	0.7519	0	0	up			Os.6489.1.S1_at	LOC_Os02g42220.1	Os02g0633300	9267947	LOC9267947	PF03169	C7IY59; Q6H7J6	transposon protein, putative, unclassified, expressed	-	osa:9267947	-	-	-	-	GO:0055085 [Name: transmembrane transport]	GO:0016021 [Name: integral component of membrane]; GO:0005886 [Name: plasma membrane]	-	1802.93	1.3162	0.0077	0.0013	Down				Os.7335.1.S1_at
Os.23598.1.S1_at	LOC_Os01g21410.1	Os01g0316500	4327262	LOC4327262	-	Q656G9	expressed protein	-	osa:4327262	-	-	-	-	-	-	-	817.978	2.1041	0	0	Down			Os.8532.1.S1_at	LOC_Os03g20340.1	Os03g0319100	4332663	LOC4332663	PF16561; PF04739	Q0DSC7; Q18PR9	SNF1-related protein kinase regulatory subunit beta-1, putative, expressed	-	osa:4332663	-	-	-	-	-	-	GO:0016301 [Name: kinase activity]	1797.65	0.6719	0.0077	0.0012	up				Os.10344.1.S1_at
Os.23802.1.A1_at	LOC_Os04g39540.1	Os04g0471300	4336124	LOC4336124	-	Q7XQM6	expressed protein	-	osa:4336124	-	-	-	-	-	GO:0016021 [Name: integral component of membrane]	-	1317.82	0.6876	0	0	up			Os.8884.1.S1_at	LOC_Os04g33420.1	Os04g0408900	4335762	LOC4335762	PF03141; PF04689	Q336Q2; P42553	DNA-binding protein S1FA, putative, expressed	S1Fa-like	osa:4349447; osa:4335762	-	-	-	-	GO:0006355 [Name: regulation of transcription, DNA-templated]	GO:0005802 [Name: trans-Golgi network]; GO:0005774 [Name: vacuolar membrane]; GO:0009505 [Name: plant-type cell wall]; GO:0005768 [Name: endosome]; GO:0005794 [Name: Golgi apparatus]; GO:0005634 [Name: nucleus]	GO:0008168 [Name: methyltransferase activity]; GO:0003677 [Name: DNA binding]	1803.32	1.1834	0.0077	0.0013	Down				Os.26629.1.S1_a_at
Os.23808.3.S1_x_at	LOC_Os05g03750.1	Os05g0128100	4337691	LOC4337691	-	Q0DL23	expressed protein	-	osa:4337691	-	-	-	-	-	GO:0016021 [Name: integral component of membrane]	-	856.071	1.4484	0	0	Down			Os.9476.1.S1_at	LOC_Os11g34180.1	Os11g0544500	4350683	LOC4350683	PF01169	B8BKY2; Q2R2Z4	uncharacterized protein family UPF0016 domain containing protein, expressed	-	osa:4350683	-	-	-	-	-	GO:0009706 [Name: chloroplast inner membrane]; GO:0016021 [Name: integral component of membrane]	GO:0005384 [Name: manganese ion transmembrane transporter activity]	1803.16	1.279	0.0077	0.0013	Down				Os.51939.1.S1_at
Os.24307.1.S1_at	LOC_Os10g39150.1	Os10g0536500	4349239	LOC4349239	PF14159	A2Z9R0; Q8W2X4	expressed protein	-	osa:4349239	-	-	-	-	-	GO:0009579 [Name: thylakoid]; GO:0009535 [Name: chloroplast thylakoid membrane]	-	935.452	1.5861	0	0	Down			Os.10419.1.S1_a_at	LOC_Os11g17504.1,LOC_Os11g17504.2	Os11g0275200,Os11g0275200	4350270; 4345026	LOC4350270; LOC4345026	PF01738	Q0ITC0; Q6ZJQ5; A3CAF9; Q53Q94; Q6ZJQ4	retrotransposon protein, putative, Ty1-copia subclass, expressed	-	osa:4350270; osa:4345026	-	-	-	-	-	GO:0031410 [Name: cytoplasmic vesicle]	GO:0016787 [Name: hydrolase activity]	1796.6	0.8864	0.0076	0.0012	up				Os.53887.1.S1_at
Os.24496.1.S1_at	LOC_Os01g13490.1	Os01g0236000	4327784	LOC4327784	-	Q5NB88	expressed protein	-	osa:4327784	-	-	-	-	-	GO:0016021 [Name: integral component of membrane]	-	1407.68	0.7545	0	0	up			Os.11078.1.S1_a_at	LOC_Os07g36080.1,LOC_Os07g36080.2,LOC_Os07g36080.3	Os07g0544800,Os07g0544800,Os07g0544800	4343515	LOC4343515	PF05757	B7EFZ9; Q0D5P8	oxygen evolving enhancer protein 3 domain containing protein, expressed	-	osa:4343515	K08901	osa01100; osa00195	osa00195 [Pathway Title: Photosynthesis]; osa01100 [Pathway Title: Metabolic pathways]	Photosynthesis; Metabolic pathways	GO:0009767 [Name: photosynthetic electron transport chain]	GO:0009507 [Name: chloroplast]; GO:0019898 [Name: extrinsic component of membrane]; GO:0009535 [Name: chloroplast thylakoid membrane]; GO:0009654 [Name: photosystem II oxygen evolving complex]	GO:0045156 [Name: electron transporter, transferring electrons within the cyclic electron transport pathway of photosynthesis activity]; GO:0005509 [Name: calcium ion binding]	1801.77	1.3985	0.0076	0.0012	Down				Os.7992.3.S1_x_at
Os.24684.1.S1_at	LOC_Os03g20640.1	Os03g0322600	4332686	LOC4332686	-	Q10M56; B8ANE9	expressed protein	-	osa:4332686	-	-	-	-	-	GO:0005739 [Name: mitochondrion]	-	607.011	1.3879	0	0	Down			Os.12348.3.S1_a_at	LOC_Os04g42010.1	Os04g0497600	4336287	LOC4336287	PF00076; PF05383; PF08777	Q7XQH8	RNA binding protein, putative, expressed	-	osa:4336287	K11090	-	-	-	GO:0006396 [Name: RNA processing]	GO:0005634 [Name: nucleus]; GO:1990904 [Name: ribonucleoprotein complex]	GO:0003723 [Name: RNA binding]	1801.99	1.2939	0.0076	0.0012	Down				OsAffx.23781.1.S1_x_at
Os.25052.1.S1_x_at	LOC_Os01g01380.1,LOC_Os01g09305.1,LOC_Os01g09320.1	Os01g0103700,None,Os01g0188400	4326768	LOC4326768	-	B7EZ59; Q0JQ08	expressed protein	-	osa:4326768	-	-	-	-	GO:0034472 [Name: snRNA 3'-end processing]	GO:0032039 [Name: integrator complex]	-	1031.72	0.5966	0	0	up			Os.26446.1.S1_at	LOC_Os03g50740.1	Os03g0715500	4333909	LOC4333909	PF00637; PF10366; PF10367; PF00780	Q307Q8	retrotransposon protein, putative, SINE subclass, expressed	-	osa:4333909	-	-	-	-	GO:0016192 [Name: vesicle-mediated transport]; GO:0006886 [Name: intracellular protein transport]	GO:0005623 [Name: cell]	-	1795.8	0.73	0.0076	0.0012	up				Os.9151.1.S1_at
Os.25122.1.S1_at	LOC_Os06g21580.1	Os06g0320300	4340891	LOC4340891	-	Q5Z9Y9	expressed protein	-	osa:4340891	-	-	-	-	-	-	-	310.362	0.349	0	0	up			Os.27849.1.S1_at	LOC_Os08g07830.1,LOC_Os08g07830.2	Os08g0175200,Os08g0175200	4344788	LOC4344788	PF03398	Q6Z4T7	DUF292 domain containing protein, expressed	-	osa:4344788	K19476	osa04144	osa04144 [Pathway Title: Endocytosis]	Endocytosis	GO:0015031 [Name: protein transport]	-	-	1795.87	0.6825	0.0076	0.0012	up				Os.12736.1.S1_x_at
Os.26357.1.S1_at	LOC_Os12g35620.1	Os12g0541400	4352440	LOC4352440	-	Q2QP55; Q84VB1; Q0IMU1	expressed protein	-	osa:4352440	-	-	-	-	-	-	-	1370.81	1.5706	0	0	Down			Os.46115.1.S1_at	LOC_Os05g29990.1	Os05g0363200	4338546	LOC4338546	PF16363	Q6I683	NAD dependent epimerase/dehydratase family domain containing protein, expressed	-	osa:4338546	K08678	osa00520; osa01100; osa00500	osa00500 [Pathway Title: Starch and sucrose metabolism]; osa01100 [Pathway Title: Metabolic pathways]; osa00520 [Pathway Title: Amino sugar and nucleotide sugar metabolism]	Amino sugar and nucleotide sugar metabolism; Metabolic pathways; Starch and sucrose metabolism	GO:0042732 [Name: D-xylose metabolic process]	GO:0005737 [Name: cytoplasm]; GO:0005802 [Name: trans-Golgi network]	GO:0048040 [Name: UDP-glucuronate decarboxylase activity]; GO:0070403 [Name: NAD+ binding]	1795.47	0.7213	0.0076	0.0012	up				Os.4190.1.S1_at
Os.26753.1.S1_at	LOC_Os07g13590.1	Os07g0240300	4342806	LOC4342806	PF11891	Q7F0B4	expressed protein	-	osa:4342806	-	-	-	-	-	GO:0016021 [Name: integral component of membrane]	-	1165.48	1.5144	0	0	Down			Os.8003.1.S1_at	LOC_Os10g41400.1	Os10g0563600	4349402	LOC4349402	PF01625	Q336R9	peptide methionine sulfoxide reductase, putative, expressed	-	osa:4349402	K07304	-	-	-	GO:0009651 [Name: response to salt stress]; GO:0006979 [Name: response to oxidative stress]; GO:0034599 [Name: cellular response to oxidative stress]	GO:0005737 [Name: cytoplasm]; GO:0009507 [Name: chloroplast]	GO:0036456 [Name: L-methionine-(S)-S-oxide reductase activity]; GO:0008113 [Name: peptide-methionine (S)-S-oxide reductase activity]	1796.67	0.7347	0.0076	0.0012	up				Os.19230.1.A1_at
Os.27022.1.A1_at	LOC_Os02g37120.1,LOC_Os02g37120.2	Os02g0582100,Os02g0582100	9269114	LOC9269114	-	C7IYS9	expressed protein	-	osa:9269114	-	-	-	-	GO:0009786 [Name: regulation of asymmetric cell division]	-	-	1472.45	1.7871	0	0	Down			Os.12385.1.S1_at	LOC_Os03g57340.1	Os03g0787300	4334359	LOC4334359	PF00684; PF00226; PF01556	Q6F3B0; Q5NKI6	chaperone protein dnaJ, putative, expressed	-	osa:4334359	K09503	osa04141	osa04141 [Pathway Title: Protein processing in endoplasmic reticulum]	Protein processing in endoplasmic reticulum	GO:0006457 [Name: protein folding]; GO:0009408 [Name: response to heat]	GO:0005829 [Name: cytosol]	GO:0051082 [Name: unfolded protein binding]; GO:0046872 [Name: metal ion binding]; GO:0031072 [Name: heat shock protein binding]; GO:0005524 [Name: ATP binding]	1795.14	0.8724	0.0075	0.0011	up				OsAffx.4196.1.S1_s_at
Os.27782.1.S1_at	LOC_Os03g52640.1,LOC_Os03g52640.2	Os03g0736400,Os03g0736400	4334030	LOC4334030	PF03602	Q10D93	expressed protein	-	osa:4334030	-	-	-	-	-	GO:0009536 [Name: plastid]	-	408.506	1.5877	0	0	Down			Os.15015.1.S1_a_at	LOC_Os08g37960.1,LOC_Os08g37960.2,LOC_Os08g37960.3	Os08g0486200,Os08g0486200,Os08g0486200	4345884	LOC4345884	PF00076	Q6ZDR7	RNA recognition motif containing protein, expressed	-	osa:4345884	K12891	osa03040	osa03040 [Pathway Title: Spliceosome]	Spliceosome	GO:0045292 [Name: mRNA cis splicing, via spliceosome]; GO:0000381 [Name: regulation of alternative mRNA splicing, via spliceosome]	GO:0005737 [Name: cytoplasm]; GO:0016607 [Name: nuclear speck]	GO:0003723 [Name: RNA binding]	1794.33	0.7437	0.0075	0.0011	up				Os.11781.1.S1_at
Os.28055.2.S1_at	LOC_Os05g01280.1	Os05g0103300	4337540	LOC4337540	PF11820	Q75M31; A6N136	expressed protein	-	osa:4337540	-	-	-	-	-	GO:0016021 [Name: integral component of membrane]	-	593.303	2.0751	0	0	Down			Os.3398.1.S1_s_at	LOC_Os06g05890.1	Os06g0152200	4340156	LOC4340156	PF00643; PF02518; PF00183	O82116; Q0J0U8; Q07078; Q69QQ6; Q40695	B-box zinc finger family protein, putative, expressed	DBB	osa:4340156; osa:4347405; osa:9267802; osa:4347402	K04079	osa04141; osa04626	osa04141 [Pathway Title: Protein processing in endoplasmic reticulum]; osa04626 [Pathway Title: Plant-pathogen interaction]	-	GO:0009640 [Name: photomorphogenesis]; GO:0006355 [Name: regulation of transcription, DNA-templated]; GO:0006457 [Name: protein folding]; GO:0009408 [Name: response to heat]; GO:0034605 [Name: cellular response to heat]; GO:0050821 [Name: protein stabilization]	GO:0005634 [Name: nucleus]; GO:0009986 [Name: cell surface]; GO:0005886 [Name: plasma membrane]; GO:0005829 [Name: cytosol]; GO:0005737 [Name: cytoplasm]; GO:0032991 [Name: macromolecular complex]; GO:0048471 [Name: perinuclear region of cytoplasm]	GO:0008270 [Name: zinc ion binding]; GO:0051082 [Name: unfolded protein binding]; GO:0005524 [Name: ATP binding]	1794.62	0.6535	0.0075	0.0011	up				Os.21862.1.S1_at
Os.28176.1.S1_at	LOC_Os01g61680.1	Os01g0833400	4327406	LOC4327406	-	Q5QLC1	expressed protein	-	osa:4327406	-	-	-	-	-	-	-	249.899	0.3243	0	0	up			Os.15571.1.S1_at	LOC_Os12g42230.1	Os12g0616900	4352803	LOC4352803	PF02780; PF02779	Q2QM55	transketolase, putative, expressed	-	osa:4352803	K00162	osa01110; osa01100; osa01130; osa00020; osa00620; osa00010; osa01200	osa00010 [Pathway Title: Glycolysis / Gluconeogenesis]; osa00020 [Pathway Title: Citrate cycle (TCA cycle)]; osa01110 [Pathway Title: Biosynthesis of secondary metabolites]; osa00620 [Pathway Title: Pyruvate metabolism]; osa01200 [Pathway Title: Carbon metabolism]; osa01130 [Pathway Title: Biosynthesis of antibiotics]; osa01100 [Pathway Title: Metabolic pathways]	Metabolic pathways; Pyruvate metabolism; Biosynthesis of antibiotics; Carbon metabolism; Glycolysis / Gluconeogenesis; Citrate cycle (TCA cycle); Biosynthesis of secondary metabolites	GO:0006096 [Name: glycolytic process]	GO:0009507 [Name: chloroplast]	GO:0004739 [Name: pyruvate dehydrogenase (acetyl-transferring) activity]	1798.59	1.2763	0.0074	0.0012	Down				Os.14882.1.S1_at
Os.28814.1.S1_at	LOC_Os01g49740.1	Os01g0692300	4325645	LOC4325645	PF05701; PF12146	Q0JK73	expressed protein	-	osa:4325645	-	-	-	-	GO:0009903 [Name: chloroplast avoidance movement]; GO:0009904 [Name: chloroplast accumulation movement]	GO:0005829 [Name: cytosol]	-	325.424	2.4861	0	0	Down			Os.20898.1.S1_at	LOC_Os02g45110.1	Os02g0672600	4330284	LOC4330284	PF05063	Q6EU10	MT-A70 domain containing protein, expressed	-	osa:4330284	K05925	-	-	-	GO:0001510 [Name: RNA methylation]; GO:0080009 [Name: mRNA methylation]; GO:0009793 [Name: embryo development ending in seed dormancy]	GO:0036396 [Name: MIS complex]; GO:0005634 [Name: nucleus]; GO:0009507 [Name: chloroplast]; GO:0016607 [Name: nuclear speck]	GO:0003723 [Name: RNA binding]; GO:0008168 [Name: methyltransferase activity]	1793.14	0.7287	0.0074	0.0011	up				Os.28409.20.A1_a_at
Os.30866.1.S1_at	LOC_Os07g02460.1	Os07g0115500	4342253	LOC4342253	-	Q8H2N9	expressed protein	-	osa:4342253	-	-	-	-	-	-	-	1399.36	0.765	0	0	up			Os.23431.1.A1_at	LOC_Os11g04370.1,LOC_Os12g04160.1	Os11g0139100,Os12g0135900	4349726	LOC4349726	PF17136; PF00467	Q2RAS9	ribosomal protein L24, putative, expressed	-	osa:4349726	K02895	osa03010	osa03010 [Pathway Title: Ribosome]	Ribosome	GO:0006412 [Name: translation]	GO:0005840 [Name: ribosome]	GO:0003735 [Name: structural constituent of ribosome]	1798.78	1.2429	0.0074	0.0012	Down				Os.5124.1.S1_s_at
Os.32279.1.S1_at	LOC_Os01g63410.1	Os01g0853000	4324817	LOC4324817	-	B8ACF8; Q5N9C0	expressed protein	-	osa:4324817	-	-	-	-	-	GO:0016021 [Name: integral component of membrane]; GO:0009507 [Name: chloroplast]	-	1360.7	1.125	0	0	Down			Os.26353.1.S1_at	LOC_Os12g44380.1,LOC_Os12g44380.2,LOC_Os12g44380.3	Os12g0641400,Os12g0641400,Os12g0641400	9266530	LOC9266530	PF07690	A6N1E8; C7JA46; F1DPP3; A2ZN77; G3E4M9; Q0ILJ3	sucrose transporter, putativ, expressed	-	osa:9266530	-	-	-	-	GO:0005985 [Name: sucrose metabolic process]	GO:0016021 [Name: integral component of membrane]; GO:0005887 [Name: integral component of plasma membrane]; GO:0005801 [Name: cis-Golgi network]; GO:0005773 [Name: vacuole]; GO:0005886 [Name: plasma membrane]; GO:0009705 [Name: plant-type vacuole membrane]; GO:0016020 [Name: membrane]	GO:0008515 [Name: sucrose transmembrane transporter activity]; GO:0015293 [Name: symporter activity]; GO:0008506 [Name: sucrose:proton symporter activity]	1792.88	0.7209	0.0074	0.0011	up				Os.9222.1.S1_at
Os.32447.1.S1_at	LOC_Os01g59080.1	Os01g0805200	4327543	LOC4327543	PF11460	Q8LR94	expressed protein	-	osa:4327543	-	-	-	-	-	GO:0016021 [Name: integral component of membrane]	-	991.629	1.4842	0	0	Down			Os.5302.1.S1_a_at	LOC_Os05g26890.1	Os05g0333200	4338448	LOC4338448	PF00503	A2Y3B5; E6Y6L5; Q0DJ33; E7EAU1	G-protein alpha subunit, putative, expressed	-	osa:4338448	K04640	-	-	-	GO:0006952 [Name: defense response]; GO:0007186 [Name: G-protein coupled receptor signaling pathway]; GO:0009870 [Name: defense response signaling pathway, resistance gene-dependent]; GO:0007188 [Name: adenylate cyclase-modulating G-protein coupled receptor signaling pathway]; GO:0010476 [Name: gibberellin mediated signaling pathway]; GO:0048639 [Name: positive regulation of developmental growth]…	GO:0005886 [Name: plasma membrane]; GO:0005834 [Name: heterotrimeric G-protein complex]	GO:0003924 [Name: GTPase activity]; GO:0031683 [Name: G-protein beta/gamma-subunit complex binding]; GO:0046872 [Name: metal ion binding]; GO:0005525 [Name: GTP binding]; GO:0001664 [Name: G-protein coupled receptor binding]	1798.45	1.2581	0.0074	0.0012	Down				Os.15567.1.S1_at
Os.32481.1.S1_at	LOC_Os01g01420.1,LOC_Os01g01420.2,LOC_Os01g01420.3,LOC_Os02g55200.2	Os01g0104100,Os01g0104100,Os01g0104100,Os02g0795300	4326292	LOC4326292	-	Q658D5	expressed protein	-	osa:4326292	-	-	-	-	-	-	-	1201.77	1.4666	0	0	Down			Os.8970.1.S1_at	LOC_Os12g41800.1,LOC_Os12g41800.2	Os12g0612100,Os12g0612100	4352773	LOC4352773	-	Q2QMA2	VTC2, putative, expressed	-	osa:4352773	-	-	-	-	GO:0006006 [Name: glucose metabolic process]	GO:0005737 [Name: cytoplasm]	GO:0080048 [Name: GDP-D-glucose phosphorylase activity]	1798.24	1.3506	0.0074	0.0012	Down				Os.49720.1.S1_at
Os.32492.1.S1_at	LOC_Os03g14040.1,LOC_Os03g14040.2,LOC_Os03g14040.3	Os03g0244000,Os03g0244000,Os03g0244000	4332227	LOC4332227	-	Q10P76	expressed protein	-	osa:4332227	-	-	-	-	-	GO:0016021 [Name: integral component of membrane]	-	493.312	2.076	0	0	Down			Os.17642.1.S1_a_at	LOC_Os04g46750.1,LOC_Os04g46750.2,LOC_Os04g46750.3	Os04g0553800,Os04g0553800,Os04g0553800	4336612	LOC4336612	PF11051	B7EDH2; B7EDH3; Q7XT35	glycosyl transferase 8 domain containing protein, putative, expressed	-	osa:4336612	-	-	-	-	GO:0006486 [Name: protein glycosylation]	GO:0016021 [Name: integral component of membrane]	GO:0016740 [Name: transferase activity]; GO:0016757 [Name: transferase activity, transferring glycosyl groups]	1798.26	1.3484	0.0073	0.0012	Down				Os.52330.1.S1_at
Os.32500.1.S1_a_at	LOC_Os06g47860.1,LOC_Os06g47860.2	Os06g0693700,Os06g0693700	4341921	LOC4341921	PF07800	Q5Z8K6; A2YGI6; Q5Z8K7	expressed protein	-	osa:4341921	-	-	-	-	-	-	GO:0003676 [Name: nucleic acid binding]	1047.56	0.552	0	0	up			Os.27540.1.S1_at	LOC_Os01g13190.1	Os01g0232700	4324282	LOC4324282	PF00815	Q5NAY4; Q0JPA8	histidinol dehydrogenase, chloroplast precursor, putative, expressed	-	osa:4324282	K00013	osa01110; osa01230; osa00340; osa01100	osa01230 [Pathway Title: Biosynthesis of amino acids]; osa00340 [Pathway Title: Histidine metabolism]; osa01110 [Pathway Title: Biosynthesis of secondary metabolites]; osa01100 [Pathway Title: Metabolic pathways]	Histidine metabolism; Metabolic pathways; Biosynthesis of secondary metabolites; Biosynthesis of amino acids	GO:0009555 [Name: pollen development]; GO:0009411 [Name: response to UV]; GO:0000105 [Name: histidine biosynthetic process]	GO:0009570 [Name: chloroplast stroma]	GO:0008270 [Name: zinc ion binding]; GO:0004399 [Name: histidinol dehydrogenase activity]; GO:0051287 [Name: NAD binding]	1796.73	1.295	0.0073	0.0012	Down				Os.7005.1.S1_s_at
Os.33954.2.S1_at	LOC_Os04g38960.1	Os04g0463600	4336077	LOC4336077	PF12776	Q7XUS3	expressed protein	-	osa:4336077	-	-	-	-	-	GO:0005739 [Name: mitochondrion]	-	1461.6	1.3727	0	0	Down			Os.3850.1.S1_a_at	LOC_Os01g11650.1	Os01g0214800	4325258	LOC4325258	PF00657	Q9LHX8	GDSL-like lipase/acylhydrolase, putative, expressed	-	osa:4325258	-	-	-	-	-	-	GO:0016788 [Name: hydrolase activity, acting on ester bonds]	1796.88	1.2491	0.0073	0.0012	Down				Os.9188.1.S1_x_at
Os.34638.1.S1_at	LOC_Os01g64930.1	Os01g0869600	4324931	LOC4324931	PF03798	Q5N944	expressed protein	-	osa:4324931	-	-	-	-	-	GO:0016021 [Name: integral component of membrane]	-	1358.52	0.6843	0	0	up			Os.6240.1.A1_at	LOC_Os02g10970.1,LOC_Os02g10970.1,LOC_Os02g10970.3,LOC_Os02g10970.3	Os02g0204201,Os02g0204300,Os02g0204201,Os02g0204300	4328668	LOC4328668	PF00160	Q0E2Y2	peptidyl-prolyl cis-trans isomerase, putative, expressed	-	osa:4328668	-	-	-	-	-	-	-	1791.59	0.718	0.0073	0.0011	up				OsAffx.29968.1.S1_s_at
Os.3507.1.S1_at	LOC_Os01g12200.1	Os01g0221500	4324652	LOC4324652	PF10184	Q0JPI2	expressed protein	-	osa:4324652	-	-	-	-	-	-	-	1367.05	1.3037	0	0	Down			Os.7484.1.S1_at	LOC_Os03g49210.1	Os03g0699200	4333814	LOC4333814	PF16589; PF06732	Q851S7	BRCA1 C Terminus domain containing protein, expressed	-	osa:4333814	K14843	-	-	-	GO:0000463 [Name: maturation of LSU-rRNA from tricistronic rRNA transcript (SSU-rRNA, 5.8S rRNA, LSU-rRNA)]; GO:0000466 [Name: maturation of 5.8S rRNA from tricistronic rRNA transcript (SSU-rRNA, 5.8S rRNA, LSU-rRNA)]; GO:2000232 [Name: regulation of rRNA processing]	GO:0030687 [Name: preribosome, large subunit precursor]; GO:0005654 [Name: nucleoplasm]; GO:0070545 [Name: PeBoW complex]	GO:0043021 [Name: ribonucleoprotein complex binding]	1790.68	0.8794	0.0072	0.0011	up				OsAffx.4296.1.S1_at
Os.35273.1.S1_at	LOC_Os07g29240.1	Os07g0475000	4343212	LOC4343212	-	Q0D6I9	expressed protein	-	osa:4343212	-	-	-	-	-	-	-	1043.89	1.3848	0	0	Down			Os.54742.1.S1_at	LOC_Os06g49870.1	Os06g0712900	4342049	LOC4342049	PF01207	Q0D9J7	tRNA-dihydrouridine synthase, putative, expressed	-	osa:4342049	K05542	-	-	-	-	GO:0005739 [Name: mitochondrion]	GO:0017150 [Name: tRNA dihydrouridine synthase activity]; GO:0050660 [Name: flavin adenine dinucleotide binding]	1795	1.2216	0.0071	0.0011	Down				Os.12723.1.S1_at
Os.36834.1.S1_at	LOC_Os04g54830.1,LOC_Os04g54830.1	Os04g0640850,Os04g0640900	4337168	LOC4337168	-	Q0J9N3; A2XY42; A3AXX0	expressed protein	-	osa:4337168	-	-	-	-	-	-	-	158.257	0.3689	0	0	up			Os.8431.1.S1_at	LOC_Os03g64110.1	Os03g0858400	4334851	LOC4334851	PF00400	Q84M69	WD domain, G-beta repeat domain containing protein, expressed	-	osa:4334851	-	-	-	-	-	GO:0005783 [Name: endoplasmic reticulum]	-	1789.77	0.7479	0.0071	0.0011	up				Os.7029.1.S1_at
Os.37009.1.S1_at	LOC_Os06g39912.1,LOC_Os06g39912.2	Os06g0601100,Os06g0601100	4341454	LOC4341454	PF15697	Q69XK9	expressed protein	-	osa:4341454	-	-	-	-	-	-	-	931.022	1.8874	0	0	Down			Os.5404.1.S1_a_at	LOC_Os01g61890.1,LOC_Os01g61890.2,LOC_Os01g61890.3,LOC_Os01g61890.4	Os01g0835600,Os01g0835600,Os01g0835600,Os01g0835600	4327454	LOC4327454	PF02178	A2WWR1; Q5QMH2	AT hook motif family protein, expressed	-	osa:4327454	-	-	-	-	-	-	GO:0003677 [Name: DNA binding]	1787.57	0.721	0.007	0.0011	up				Os.9868.1.S1_at
Os.37869.2.S1_a_at	LOC_Os01g15270.1	Os01g0256500	4327719	LOC4327719	PF03242	B1PXF8; B7EFV3; B8ABU3; A6N1D4; Q1EHU2; Q40647; Q8RYA3; O22538; Q0JNY8; A2TEQ3	expressed protein	-	osa:4327719	-	-	-	-	-	GO:0016021 [Name: integral component of membrane]; GO:0005739 [Name: mitochondrion]	-	1158.57	0.5568	0	0	up			Os.12354.1.S1_at	LOC_Os01g64680.1	Os01g0866600	4325073	LOC4325073	PF01722	Q5N9F3	bolA, putative, expressed	-	osa:4325073	K05527	-	-	-	-	-	-	1792.65	1.3409	0.0069	0.0011	Down				Os.20775.1.S1_at
Os.38237.1.S1_s_at	LOC_Os06g08884.1,LOC_Os06g08884.2,LOC_Os08g25864.1,LOC_Os11g06934.1,LOC_Os12g01744.1	Os06g0188550,Os06g0188550,Os08g0347200,Os11g0170400,Os12g0108200	4345344; 9268659	LOC9268659	-	Q0J694; C7J9W7	expressed protein	-	osa:4345344; osa:9268659	-	-	-	-	-	-	-	867.238	1.538	0	0	Down			Os.2685.1.S1_at	LOC_Os01g68790.1,LOC_Os01g68790.2,LOC_Os01g68790.3,LOC_Os01g68790.4	Os01g0916600,Os01g0916600,Os01g0916600,Os01g0916600	4324334	LOC4324334	PF00076	Q7F2X8; O24188	RNA recognition motif containing protein, putative, expressed	-	osa:4324334	-	-	-	-	GO:0080156 [Name: mitochondrial mRNA modification]	GO:1990904 [Name: ribonucleoprotein complex]; GO:0005739 [Name: mitochondrion]	GO:0003723 [Name: RNA binding]	1793.14	1.2572	0.0069	0.0011	Down				Os.16410.1.S1_s_at
Os.38283.1.S3_a_at	LOC_Os05g41550.2,LOC_Os05g41550.3,LOC_Os05g41550.5	Os05g0495300,Os05g0495300,Os05g0495300	4339197	-	-	Q65X72; Q0DH29	expressed protein	-	osa:4339197	-	-	-	-	-	GO:0016021 [Name: integral component of membrane]	-	1081.58	2.2187	0	0	Down			Os.15138.1.S1_at	LOC_Os01g41900.1,LOC_Os01g41900.2	Os01g0603300,Os01g0603300	4324094	LOC4324094	PF00249	Q8W0M6	Myb transcription factor, putative, expressed	MYB_related	osa:4324094	-	-	-	-	-	GO:0005634 [Name: nucleus]	GO:0003677 [Name: DNA binding]	1791.51	1.1083	0.0068	0.0011	Down				OsAffx.12504.1.S1_at
Os.38386.1.A1_at	LOC_Os04g42030.1	Os04g0497900	4336289	LOC4336289	-	Q7XUK7	expressed protein	-	osa:4336289	-	-	-	-	GO:0009793 [Name: embryo development ending in seed dormancy]	GO:0009507 [Name: chloroplast]	-	1342.84	1.2726	0	0	Down			Os.15262.1.S1_at	LOC_Os01g73160.1	Os01g0962600	4324553	LOC4324553	PF03501	Q94DM7	40S ribosomal protein S10, putative, expressed	-	osa:4324553	K02947	osa03010	osa03010 [Pathway Title: Ribosome]	Ribosome	GO:0000028 [Name: ribosomal small subunit assembly]	GO:0022627 [Name: cytosolic small ribosomal subunit]	GO:0003735 [Name: structural constituent of ribosome]	1792.35	1.2857	0.0068	0.0011	Down				Os.10799.1.S1_at
Os.38760.1.S1_s_at	LOC_Os05g28090.1,LOC_Os05g28090.2,LOC_Os05g28090.3	Os05g0348100,Os05g0348100,Os05g0348100	9269617	LOC9269617	PF10716	Q5W654	expressed protein	-	osa:9269617	-	-	-	-	-	GO:0016021 [Name: integral component of membrane]	GO:0016655 [Name: oxidoreductase activity, acting on NAD(P)H, quinone or similar compound as acceptor]	775.342	1.7808	0	0	Down			Os.27375.1.A1_at	LOC_Os02g04460.1	Os02g0137200	4328236	LOC4328236	PF00297	B1NEV5; Q0E446	ribosomal protein L3, putative, expressed	-	osa:4328236	K02906	osa03010	osa03010 [Pathway Title: Ribosome]	Ribosome	GO:0006412 [Name: translation]	GO:0005840 [Name: ribosome]; GO:0009941 [Name: chloroplast envelope]	GO:0003735 [Name: structural constituent of ribosome]	1791.43	1.1898	0.0068	0.0011	Down				Os.13708.2.A1_at
Os.38851.1.A1_s_at	LOC_Os04g55930.1	Os04g0653100	4337241	LOC4337241	PF03647	A2XYD6; Q7XPM7; A3AY48	expressed protein	-	osa:4337241	-	-	-	-	-	GO:0016021 [Name: integral component of membrane]	-	795.18	1.5978	0	0	Down			Os.20684.1.S1_at	LOC_Os03g52430.1	Os03g0734700	4334018	LOC4334018	PF00153	Q6AVS9	mitochondrial carrier protein, putative, expressed	-	osa:4334018	K15115	-	-	-	-	GO:0016021 [Name: integral component of membrane]; GO:0009941 [Name: chloroplast envelope]	GO:0008517 [Name: folic acid transporter activity]; GO:0015230 [Name: FAD transmembrane transporter activity]	1783.86	0.7046	0.0066	0.001	up				Os.14084.1.S1_at
Os.39172.1.S1_at	LOC_Os03g08870.1	Os03g0187700	4331882	LOC4331882	-	Q8H7P3	expressed protein	-	osa:4331882	-	-	-	-	GO:0015031 [Name: protein transport]	GO:0000138 [Name: Golgi trans cisterna]; GO:0030173 [Name: integral component of Golgi membrane]; GO:0031201 [Name: SNARE complex]	GO:0005484 [Name: SNAP receptor activity]	677.478	0.529	0	0	up			Os.33510.1.S2_at	LOC_Os01g25320.1	Os01g0355500	4326280	LOC4326280	-	Q5ZCQ7	auxilin, putative, expressed	-	osa:4326280	-	-	-	-	GO:0006898 [Name: receptor-mediated endocytosis]; GO:0072583 [Name: clathrin-dependent endocytosis]; GO:0072318 [Name: clathrin coat disassembly]	GO:0043231 [Name: intracellular membrane-bounded organelle]; GO:0031982 [Name: vesicle]; GO:0005737 [Name: cytoplasm]	GO:0030276 [Name: clathrin binding]	1783.97	0.6281	0.0066	0.001	up				Os.14366.1.S1_s_at
Os.4321.1.S1_at	LOC_Os03g03640.1	Os03g0128400	4331488	LOC4331488	-	Q9SNL3	expressed protein	-	osa:4331488	-	-	-	-	-	GO:0016021 [Name: integral component of membrane]	-	1510.95	1.4661	0	0	Down			Os.6646.1.S1_at	LOC_Os09g32690.1,LOC_Os09g32690.2,LOC_Os09g32690.3	Os09g0504700,Os09g0504700,Os09g0504700	4347500	LOC4347500	PF13923	B7EMU6	zinc finger, C3HC4 type domain containing protein, expressed	-	osa:4347500	-	-	-	-	-	-	-	1783.81	0.665	0.0066	0.001	up				Os.18710.1.S1_at
Os.4324.1.S1_at	LOC_Os03g03670.1	Os03g0128800	4331491	LOC4331491	-	Q10SA9; Q0DVI1	expressed protein	-	osa:4331491	-	-	-	-	-	GO:0009507 [Name: chloroplast]	-	1122.79	1.5297	0	0	Down			Os.9747.1.S1_at	LOC_Os02g48110.1	Os02g0710900	4330492	LOC4330492	PF00012	Q6ZFX8	DnaK family protein, putative, expressed	-	osa:4330492	K09486	osa04141	osa04141 [Pathway Title: Protein processing in endoplasmic reticulum]	Protein processing in endoplasmic reticulum	GO:0071456 [Name: cellular response to hypoxia]; GO:1903298 [Name: negative regulation of hypoxia-induced intrinsic apoptotic signaling pathway]	GO:0005783 [Name: endoplasmic reticulum]; GO:0034663 [Name: endoplasmic reticulum chaperone complex]	GO:0005524 [Name: ATP binding]	1789.24	1.3213	0.0066	0.0011	Down				Os.28416.1.S1_at
Os.4513.1.S1_at	LOC_Os06g02440.1,LOC_Os06g02440.1	Os06g0114651,Os06g0114700	4339916	LOC4339916	PF06749	Q9LWS9	expressed protein	-	osa:4339916	-	-	-	-	-	GO:0016021 [Name: integral component of membrane]	-	1292.79	1.7303	0	0	Down			OsAffx.17989.1.S1_s_at	LOC_Os09g33860.1	Os09g0513600	4347559	LOC4347559	PF07714	-	protein kinase, putative, expressed	-	osa:4347559	-	-	-	-	-	GO:0031410 [Name: cytoplasmic vesicle]	-	1783.12	0.6613	0.0066	0.001	up				Os.7692.1.S2_at
Os.45931.1.S1_at	LOC_Os04g33110.1,LOC_Os04g33110.2	Os04g0403900,Os04g0403900	9267281	LOC9267281	-	Q7XSC7	expressed protein	-	osa:9267281	-	-	-	-	-	-	-	268.856	2.5356	0	0	Down			OsAffx.32337.1.S1_x_at	LOC_Os01g57958.1,LOC_Os04g16826.1,LOC_Os05g22724.1,LOC_Os10g21344.1,LOC_Os09g19954.1	None,None,None,None,None	-	-	PF00252	-	chloroplast 50S ribosomal protein L16, putative, expressed	-	-	-	-	-	-	-	-	-	1782.72	0.8824	0.0066	0.001	up				Os.11155.1.S1_at
Os.45934.1.S1_at	LOC_Os01g09770.1	Os01g0194000	4327312	LOC4327312	-	-	expressed protein	-	osa:4327312	-	-	-	-	-	-	-	91.123	0.1939	0	0	up			Os.11093.1.S1_at	LOC_Os02g07060.1	Os02g0167300	4328420	LOC4328420	PF00091; PF03953	P46265; Q0E3L8	tubulin/FtsZ domain containing protein, putative, expressed	-	osa:4328420	K07375	osa04145	osa04145 [Pathway Title: Phagosome]	Phagosome	GO:0000226 [Name: microtubule cytoskeleton organization]; GO:0007017 [Name: microtubule-based process]; GO:0000278 [Name: mitotic cell cycle]	GO:0005874 [Name: microtubule]; GO:0005737 [Name: cytoplasm]	GO:0005200 [Name: structural constituent of cytoskeleton]; GO:0005525 [Name: GTP binding]; GO:0003924 [Name: GTPase activity]	1787.08	1.2426	0.0065	0.001	Down				Os.1437.1.S1_at
Os.4606.1.S1_at	LOC_Os05g03540.1	Os05g0126200	4337680	LOC4337680	-	Q75IM4	expressed protein	-	osa:4337680	-	-	-	-	-	GO:0005739 [Name: mitochondrion]	-	598.952	1.5981	0	0	Down			Os.22460.1.S1_at	LOC_Os02g35640.1	Os02g0564500	4329697	LOC4329697	PF04178	Q6Z7E9	SFT2, putative, expressed	-	osa:4329697	-	-	-	-	GO:0016192 [Name: vesicle-mediated transport]; GO:0015031 [Name: protein transport]	GO:0016021 [Name: integral component of membrane]	-	1786.61	1.3711	0.0065	0.001	Down				Os.26642.1.S1_a_at
Os.4628.1.S1_at	LOC_Os04g38914.1	Os04g0463100	-	-	-	-	expressed protein	-	-	-	-	-	-	-	-	-	1378.48	1.6413	0	0	Down			Os.22472.2.S1_at	LOC_Os10g22430.1,LOC_Os10g22430.2	Os10g0369600,Os10g0369600	-	-	PF03514	-	gibberellin response modulator protein, putative, expressed	GRAS	-	-	-	-	-	-	-	-	1782.57	0.7274	0.0065	0.001	up				Os.4961.3.S1_x_at
Os.4629.1.S1_at	LOC_Os01g03760.1,LOC_Os01g03760.2	Os01g0128400,Os01g0128400	4325966	LOC4325966	PF10151	Q9LGA3	expressed protein	-	osa:4325966	-	-	-	-	-	GO:0005794 [Name: Golgi apparatus]; GO:0005783 [Name: endoplasmic reticulum]; GO:0009506 [Name: plasmodesma]; GO:0005774 [Name: vacuolar membrane]; GO:0005634 [Name: nucleus]; GO:0005886 [Name: plasma membrane]	-	1336.76	1.6376	0	0	Down			Os.3411.1.S1_s_at	LOC_Os03g45280.1	Os03g0655400	4333610	LOC4333610	-	A6N0D7; O22389; Q0DPX0; O48673; Q40711; A6N0L2	dehydrin, putative, expressed	-	osa:4333610	-	-	-	-	-	-	GO:0046872 [Name: metal ion binding]	1782.16	0.6886	0.0065	0.001	up				Os.51187.1.S1_at
Os.46304.1.S1_a_at	LOC_Os06g45090.1,LOC_Os06g45090.2	Os06g0661766,Os06g0661766	9271699	LOC9271699	-	C7J421	expressed protein	-	osa:9271699	-	-	-	-	-	-	-	537.309	0.4796	0	0	up			Os.4168.1.S1_s_at	LOC_Os05g04630.1,LOC_Os05g04630.2,LOC_Os05g04630.3,LOC_Os05g04630.4,LOC_Os05g04630.5,LOC_Os05g04630.6	Os05g0137400,Os05g0137400,Os05g0137400,Os05g0137400,Os05g0137400,Os05g0137400	4337744	LOC4337744	PF05184; PF00026; PF03489	B9FMC0; B8AXV2; P42211; Q0DKX3	retrotransposon protein, putative, SINE subclass, expressed	-	osa:4337744	K08245	-	-	-	GO:0006629 [Name: lipid metabolic process]; GO:0006508 [Name: proteolysis]; GO:0030163 [Name: protein catabolic process]	GO:0005773 [Name: vacuole]	GO:0004190 [Name: aspartic-type endopeptidase activity]	1782.35	0.6574	0.0065	0.001	up				Os.7144.2.S1_a_at
Os.4631.1.S1_at	LOC_Os06g21110.1	Os06g0316000	4340874	LOC4340874	-	Q5Z4Q8	expressed protein	-	osa:4340874	-	-	-	-	-	-	-	1457.69	1.3509	0	0	Down			Os.9205.1.S1_s_at	LOC_Os03g62340.1	Os03g0839900	4334727	LOC4334727	PF00069; PF00582	A2XNV2; Q6AVR9; Q851P3; B8AN64	protein kinase family protein, putative, expressed	-	osa:4334727	-	-	-	-	GO:0006468 [Name: protein phosphorylation]	GO:0005886 [Name: plasma membrane]	GO:0004672 [Name: protein kinase activity]; GO:0005524 [Name: ATP binding]; GO:0004675 [Name: transmembrane receptor protein serine/threonine kinase activity]	1782.1	0.7069	0.0065	0.001	up				Os.8748.1.S1_at
Os.4633.1.S1_at	LOC_Os01g59970.1	Os01g0815400	4327481	LOC4327481	-	Q5N756	expressed protein	-	osa:4327481	-	-	-	-	-	GO:0031410 [Name: cytoplasmic vesicle]	-	1390.37	1.4405	0	0	Down			OsAffx.24925.1.S1_x_at	LOC_Os02g58560.1,LOC_Os02g58560.3	Os02g0832500,Os02g0832500	4331260	-	PF02364; PF14288	B8AFI9; Q7XJC6	1,3-beta-glucan synthase component, putative, expressed	-	osa:4331260	-	-	-	-	GO:0006075 [Name: (1->3)-beta-D-glucan biosynthetic process]	GO:0000148 [Name: 1,3-beta-D-glucan synthase complex]; GO:0016021 [Name: integral component of membrane]	GO:0003843 [Name: 1,3-beta-D-glucan synthase activity]	1782.4	0.731	0.0065	0.001	up				Os.17665.2.S1_at
Os.4658.2.S1_at	LOC_Os08g34270.2	Os08g0441400	4345688	LOC4345688	PF02297	Q6Z9E8	expressed protein	-	osa:4345688	-	-	-	-	-	GO:0005739 [Name: mitochondrion]	-	1400.38	1.6373	0	0	Down			Os.19726.1.S1_x_at	LOC_Os03g36790.1,LOC_Os03g36790.2,LOC_Os03g36790.3	Os03g0565600,Os03g0565600,Os03g0565600	9271241	LOC9271241	PF06454	C7J005; Q10I36	tobamovirus multiplication protein, putative, expressed	-	osa:9271241	-	-	-	-	-	GO:0016021 [Name: integral component of membrane]; GO:0009705 [Name: plant-type vacuole membrane]	-	1779.88	0.6517	0.0064	0.001	up				Os.20702.1.S1_at
Os.46584.1.S1_x_at	LOC_Os06g05120.1,LOC_Os01g08300.1,LOC_Os05g08554.1,LOC_Os06g05120.2	Os06g0143100,Os01g0178300,Os05g0178300,Os06g0143100	9268366	LOC9268366	PF12734	Q5VSB6	expressed protein	-	osa:9268366	-	-	-	-	-	-	-	1252.65	1.578	0	0	Down			Os.14676.1.S1_a_at	LOC_Os06g09570.1,LOC_Os07g01920.1	Os06g0195900,Os07g0110200	4340389; 4342225	LOC4340389; LOC4342225	PF08155; PF06858	B9FV60; Q0D929; B8B3N7; A2YHG3; Q0DDV9; Q8LIM1; Q69YA7	nucleolar GTP-binding protein 1, putative, expressed	-	osa:4342225; osa:4340389	K06943	osa03008	osa03008 [Pathway Title: Ribosome biogenesis in eukaryotes]	Ribosome biogenesis in eukaryotes	GO:0042254 [Name: ribosome biogenesis]	GO:0005730 [Name: nucleolus]	GO:0005525 [Name: GTP binding]	1779.2	0.8574	0.0063	0.0009	up				Os.12183.1.S1_at
Os.46632.1.S1_at	LOC_Os10g39800.1	Os10g0545100	4349277	LOC4349277	PF12646	Q0IVZ6	expressed protein	-	osa:4349277	-	-	-	-	-	GO:0009536 [Name: plastid]	-	1223.93	1.445	0	0	Down			Os.16248.1.S1_at	LOC_Os02g56250.1,LOC_Os02g56250.1	Os02g0806300,Os02g0806400	9269581	LOC9269581	PF00320	A6N099; Q6K8F3	GATA zinc finger domain containing protein, expressed	GATA	osa:9269581	-	-	-	-	-	GO:0009536 [Name: plastid]	-	1784.21	1.2454	0.0063	0.001	Down				Os.7403.1.S1_at
Os.46661.1.S1_s_at	LOC_Os10g34270.1	Os10g0483900	4348933	LOC4348933	-	Q8LNV2	expressed protein	-	osa:4348933	-	-	-	-	-	GO:0016021 [Name: integral component of membrane]	-	940.172	1.8645	0	0	Down			OsAffx.32332.1.S1_x_at	LOC_Os04g16838.1,LOC_Os05g22712.1,LOC_Os10g21332.1,LOC_Os06g39700.1,LOC_Os09g07910.1	None,None,None,None,None	-	-	PF01000; PF01193; PF03118	-	chloroplast 30S ribosomal protein S11, putative, expressed	-	-	-	-	-	-	-	-	-	1778.5	1.0474	0.0063	0.0009	up				Os.8717.1.S1_at
Os.4675.1.S1_at	LOC_Os01g68030.1	Os01g0908400	4324987	LOC4324987	-	Q8L416; A2WY49	expressed protein	-	osa:4324987	-	-	-	-	-	GO:0005747 [Name: mitochondrial respiratory chain complex I]	-	485.988	2.0093	0	0	Down			Os.12975.1.S1_at	LOC_Os03g13950.1,LOC_Os03g13950.2	Os03g0243100,Os03g0243100	4332220	LOC4332220	PF00241	Q10P87; B7EFI2	actin-depolymerizing factor, putative, expressed	-	osa:4332220	K05765	-	-	-	GO:0030042 [Name: actin filament depolymerization]	GO:0015629 [Name: actin cytoskeleton]	GO:0003779 [Name: actin binding]	1776.08	0.7057	0.0062	0.0009	up				OsAffx.26387.1.S1_at
Os.4731.1.A1_s_at	LOC_Os04g59140.1	Os04g0688000	9269370	LOC9269370	PF05633	-	expressed protein	-	osa:9269370	-	-	-	-	-	-	-	274.3	0.2551	0	0	up			Os.14644.1.S1_at	LOC_Os01g74010.1,LOC_Os01g74010.2	Os01g0971700,Os01g0971700	4323848	LOC4323848	PF03364	Q5JME4	cyclase/dehydrase family protein, expressed	-	osa:4323848	-	-	-	-	-	-	-	1782.42	1.2449	0.0062	0.001	Down				Os.11303.1.S1_at
Os.4757.1.S2_at	LOC_Os11g04409.1,LOC_Os11g04409.2	Os11g0139700,Os11g0139700	-	-	-	-	expressed protein	-	-	-	-	-	-	-	-	-	138.123	0.1819	0	0	up			Os.17313.1.S1_at	LOC_Os12g05230.1	Os12g0147500	4351499	LOC4351499	PF00270	Q2QXQ5	ATP-dependent RNA helicase, putative, expressed	-	osa:4351499	-	-	-	-	-	-	GO:0003676 [Name: nucleic acid binding]; GO:0004386 [Name: helicase activity]; GO:0005524 [Name: ATP binding]	1775.58	0.7401	0.0062	0.0009	up				Os.15761.1.S1_at
Os.47598.1.S1_at	LOC_Os01g12190.1	Os01g0221400	9272458	LOC9272458	PF10184	Q9LE65	expressed protein	-	osa:9272458	-	-	-	-	-	-	-	1475.13	1.2947	0	0	Down			Os.45906.1.S1_at	LOC_Os01g58390.1	Os01g0796500	4325633	LOC4325633	-	-	haloacid dehalogenase, putative, expressed	-	osa:4325633	K01094	osa00564; osa01100	osa00564 [Pathway Title: Glycerophospholipid metabolism]; osa01100 [Pathway Title: Metabolic pathways]	Metabolic pathways; Glycerophospholipid metabolism	-	GO:0005739 [Name: mitochondrion]	-	1783.59	1.274	0.0062	0.001	Down				Os.2371.1.S1_at
Os.48079.1.S1_at	LOC_Os07g38150.1	Os07g0568900	4343647	LOC4343647	-	A3BLB2; Q7XII6	expressed protein	-	osa:4343647	-	-	-	-	-	GO:0016021 [Name: integral component of membrane]; GO:0009535 [Name: chloroplast thylakoid membrane]	-	1353.13	1.3693	0	0	Down			Os.11598.1.S1_at	LOC_Os12g13590.1,LOC_Os12g13590.2	Os12g0238100,Os12g0238100	4351857	LOC4351857	PF07393	Q2QV94; Q0IP77	exocyst complex component 5, putative, expressed	-	osa:4351857	-	-	-	-	GO:0015031 [Name: protein transport]; GO:0006893 [Name: Golgi to plasma membrane transport]; GO:0048278 [Name: vesicle docking]; GO:0060321 [Name: acceptance of pollen]; GO:0006887 [Name: exocytosis]	GO:0005886 [Name: plasma membrane]; GO:0000145 [Name: exocyst]; GO:0005829 [Name: cytosol]; GO:0009506 [Name: plasmodesma]; GO:0070062 [Name: extracellular exosome]	-	1781.82	1.3192	0.0061	0.001	Down				Os.2444.1.S1_at
Os.4816.1.S1_at	LOC_Os02g02240.1	Os02g0113300	4328057	LOC4328057	PF07762	A2X027; A2X022; B8AGH1; Q6Z7C7	expressed protein	-	osa:4328057	-	-	-	-	-	-	-	1272.33	1.6605	0	0	Down			Os.18678.1.S1_at	LOC_Os09g20990.1	Os09g0376800	-	TPS11	PF00982; PF02358	H6ST22	trehalose-6-phosphate synthase, putative, expressed	-	-	-	-	-	-	GO:0005992 [Name: trehalose biosynthetic process]	-	GO:0003824 [Name: catalytic activity]	1774.86	0.6153	0.0061	0.0009	up				Os.25567.1.S1_at
Os.49235.1.S1_at	LOC_Os02g44540.1,LOC_Os02g44540.2,LOC_Os02g44540.3,LOC_Os02g44540.4,LOC_Os02g44540.5,LOC_Os02g44540.6	Os02g0664700,Os02g0664700,Os02g0664700,Os02g0664700,Os02g0664700,Os02g0664700	9267931	LOC9267931	-	B7EAY8; Q6ESI2	expressed protein	-	osa:9267931	-	-	-	-	-	-	-	1475.63	1.3341	0	0	Down			Os.3400.1.S1_s_at	LOC_Os02g49230.1,LOC_Os02g49230.2,LOC_Os02g49230.3,LOC_Os02g49230.4,LOC_Os02g49230.5,LOC_Os02g49230.6	Os02g0724000,Os02g0724000,Os02g0724000,Os02g0724000,Os02g0724000,Os02g0724000	4330574	LOC4330574	PF06203	O82118	CCT/B-box zinc finger protein, putative, expressed	CO-like	osa:4330574	-	-	-	-	-	GO:0005634 [Name: nucleus]	GO:0008270 [Name: zinc ion binding]	1774.26	0.7454	0.0061	0.0009	up				Os.27606.1.S1_at
Os.49357.1.S1_at	LOC_Os02g55840.4,LOC_Os02g55840.6,LOC_Os02g55840.5,LOC_Os02g55840.1,LOC_Os02g55840.3,LOC_Os02g55840.2	Os02g0801900,Os02g0801900,Os02g0801900,Os02g0801900,Os02g0801900,Os02g0801900	4331041	LOC4331041	-	Q0DWQ5	expressed protein	-	osa:4331041	-	-	-	-	-	-	-	1065.96	0.6133	0	0	up			Os.7755.1.S1_at	LOC_Os07g27320.1	Os07g0456700	4343146	LOC4343146	PF02018; PF00331	A3BJE9; Q84YR7; A2YKY4	glycosyl hydrolase family 10 protein, putative, expressed	-	osa:4343146	-	-	-	-	GO:0005975 [Name: carbohydrate metabolic process]	GO:0005739 [Name: mitochondrion]	GO:0004553 [Name: hydrolase activity, hydrolyzing O-glycosyl compounds]	1774.11	0.6998	0.0061	0.0009	up				Os.36961.1.S1_x_at
Os.49571.1.S1_at	LOC_Os03g15530.1	Os03g0261800	4332321	LOC4332321	PF11250	Q10NR6	expressed protein	-	osa:4332321	-	-	-	-	-	-	-	594.841	0.5661	0	0	up			Os.17919.1.S1_at	LOC_Os04g52130.1	Os04g0610800	4336951	LOC4336951	PF01218	Q7XPL2	coproporphyrinogen III oxidase, chloroplast precursor, putative, expressed	-	osa:4336951	K00228	osa01100; osa00860; osa01110	osa01110 [Pathway Title: Biosynthesis of secondary metabolites]; osa00860 [Pathway Title: Porphyrin and chlorophyll metabolism]; osa01100 [Pathway Title: Metabolic pathways]	Porphyrin and chlorophyll metabolism; Metabolic pathways; Biosynthesis of secondary metabolites	GO:0015995 [Name: chlorophyll biosynthetic process]; GO:0019353 [Name: protoporphyrinogen IX biosynthetic process from glutamate]	GO:0005737 [Name: cytoplasm]; GO:0005829 [Name: cytosol]; GO:0009570 [Name: chloroplast stroma]	GO:0004109 [Name: coproporphyrinogen oxidase activity]; GO:0042803 [Name: protein homodimerization activity]	1780.26	1.213	0.006	0.001	Down				Os.46074.1.A1_at
Os.49593.1.S1_x_at	LOC_Os09g29060.1	Os09g0465500	4347310	LOC4347310	-	Q6YXI2	expressed protein	-	osa:4347310	-	-	-	-	-	-	-	931.158	0.7457	0	0	up			Os.19944.1.S1_at	LOC_Os12g43560.1	Os12g0631200	4352863	LOC4352863	PF13456; PF01485	Q2QLR6	zinc finger, putative, expressed	-	osa:4352863	-	-	-	-	GO:0032436 [Name: positive regulation of proteasomal ubiquitin-dependent protein catabolic process]; GO:0006511 [Name: ubiquitin-dependent protein catabolic process]; GO:0000209 [Name: protein polyubiquitination]	GO:0000151 [Name: ubiquitin ligase complex]; GO:0005737 [Name: cytoplasm]	GO:0003676 [Name: nucleic acid binding]; GO:0061630 [Name: ubiquitin protein ligase activity]; GO:0046872 [Name: metal ion binding]; GO:0004523 [Name: RNA-DNA hybrid ribonuclease activity]; GO:0031624 [Name: ubiquitin conjugating enzyme binding]	1773.41	0.6205	0.006	0.0009	up				Os.50278.1.S1_at
Os.49710.1.S1_at	LOC_Os11g40600.1	Os11g0621400	4350948	LOC4350948	-	Q0IRK3; Q2R123	expressed protein	-	osa:4350948	-	-	-	-	-	GO:0016021 [Name: integral component of membrane]	-	935.643	1.4999	0	0	Down			Os.2599.1.S1_at	LOC_Os10g35920.1	Os10g0502900	4349047	LOC4349047	PF12937	Q337F4	OsFBX389 - F-box domain containing protein, expressed	-	osa:4349047	-	-	-	-	GO:0050829 [Name: defense response to Gram-negative bacterium]	GO:0016021 [Name: integral component of membrane]	GO:1905761 [Name: SCF ubiquitin ligase complex binding]	1773.19	0.6973	0.006	0.0009	up				Os.5843.1.S1_at
Os.49742.1.S1_at	LOC_Os08g19210.1	Os08g0289000	4345180	LOC4345180	-	Q6Z2C3; Q6Z2C4	expressed protein	-	osa:4345180	-	-	-	-	-	-	-	909.152	0.6508	0	0	up			Os.26818.1.S1_a_at	LOC_Os03g19650.1,LOC_Os03g19650.2,LOC_Os03g19650.3,LOC_Os03g19650.4	Os03g0309800,Os03g0309800,Os03g0309800,Os03g0309800	4332626	LOC4332626	PF01535; PF13812; PF13041	B8AMI1; Q10MG3	PPR2, putative, expressed	-	osa:4332626	-	-	-	-	GO:0009793 [Name: embryo development ending in seed dormancy]; GO:0009555 [Name: pollen development]; GO:0048868 [Name: pollen tube development]; GO:0009553 [Name: embryo sac development]	GO:0009507 [Name: chloroplast]; GO:0005739 [Name: mitochondrion]	GO:0019843 [Name: rRNA binding]	1780.36	1.2738	0.006	0.001	Down				Os.6512.1.S1_at
Os.4995.1.S1_at	LOC_Os03g55776.1	Os03g0766800	4334231	LOC4334231	PF09754	Q7Y0C5	expressed protein	-	osa:4334231	-	-	-	-	-	-	-	215.898	0.2996	0	0	up			Os.57453.1.S1_x_at	LOC_Os10g37420.2,LOC_Os10g37420.1	Os10g0518200,Os10g0518200	4349127	LOC4349127	PF00173	Q7XCR6; B8BHW2	cytochrome b5-like Heme/Steroid binding domain containing protein, expressed	-	osa:4349127	-	-	-	-	GO:0022900 [Name: electron transport chain]	GO:0016021 [Name: integral component of membrane]; GO:0005774 [Name: vacuolar membrane]; GO:0005783 [Name: endoplasmic reticulum]; GO:0009535 [Name: chloroplast thylakoid membrane]; GO:0005886 [Name: plasma membrane]	GO:0020037 [Name: heme binding]; GO:0046872 [Name: metal ion binding]	1773.76	0.6719	0.006	0.0009	up				Os.7930.1.S1_x_at
Os.50024.1.S1_at	LOC_Os05g12481.1	Os05g0215700	4338115	LOC4338115	-	Q0DJX5	expressed protein	-	osa:4338115	-	-	-	-	-	-	-	614.895	1.4412	0	0	Down			Os.7913.1.S1_a_at	LOC_Os06g49430.1,LOC_Os06g49430.2	Os06g0708000,Os06g0708000	4342017	LOC4342017	PF00069	B3GCL0; Q0D9M9; Q5Z9J0	CGMC_MAPKCMGC_2.11 - CGMC includes CDA, MAPK, GSK3, and CLKC kinases, expressed	-	osa:4342017	-	-	-	-	GO:0035556 [Name: intracellular signal transduction]; GO:0006952 [Name: defense response]; GO:0010468 [Name: regulation of gene expression]	GO:0005634 [Name: nucleus]; GO:0005737 [Name: cytoplasm]	GO:0005524 [Name: ATP binding]; GO:0004707 [Name: MAP kinase activity]	1773.19	0.7098	0.006	0.0009	up				Os.9172.1.S1_x_at
Os.50224.1.S1_at	LOC_Os01g69110.1,LOC_Os01g69110.2	Os01g0920200,Os01g0920200	4327741	LOC4327741	PF10163	Q0JGJ6	expressed protein	-	osa:4327741	K11368	-	-	-	GO:0016578 [Name: histone deubiquitination]; GO:0016973 [Name: poly(A)+ mRNA export from nucleus]; GO:0006357 [Name: regulation of transcription from RNA polymerase II promoter]; GO:0006368 [Name: transcription elongation from RNA polymerase II promoter]; GO:0045893 [Name: positive regulation of transcription, DNA-templated]	GO:0071819 [Name: DUBm complex]; GO:0005643 [Name: nuclear pore]; GO:0000124 [Name: SAGA complex]; GO:0070390 [Name: transcription export complex 2]	GO:0003682 [Name: chromatin binding]; GO:0003713 [Name: transcription coactivator activity]	1019.3	1.8471	0	0	Down			OsAffx.4276.1.S1_s_at	LOC_Os05g08360.1,LOC_Os05g08360.2	Os05g0176000,Os05g0176000	9266224	LOC9266224	PF01269	B7FA85; C7J2A5	rRNA 2-O-methyltransferase fibrillarin 2, putative, expressed	-	osa:9266224	-	-	-	-	GO:0000494 [Name: box C/D snoRNA 3'-end processing]; GO:1990258 [Name: histone glutamine methylation]; GO:0031167 [Name: rRNA methylation]; GO:0006364 [Name: rRNA processing]	GO:0015030 [Name: Cajal body]; GO:0031428 [Name: box C/D snoRNP complex]; GO:0032040 [Name: small-subunit processome]	GO:0008649 [Name: rRNA methyltransferase activity]; GO:1990259 [Name: histone-glutamine methyltransferase activity]; GO:0003723 [Name: RNA binding]; GO:0008168 [Name: methyltransferase activity]	1779.86	1.1951	0.006	0.0009	Down				Os.9261.1.A1_at
Os.50268.1.S1_at	LOC_Os05g45440.1	Os05g0531000	4339412	LOC4339412	PF04520	Q75K57	expressed protein	-	osa:4339412	-	-	-	-	-	-	-	1503.43	0.925	0	0	up			Os.9803.1.S1_a_at	LOC_Os01g55170.1	Os01g0756400	4325141	LOC4325141	PF05383; PF00076	Q0JJ76; A2ZXY8; Q5JM05; B8A9R8	la domain containing protein, expressed	-	osa:4325141	-	-	-	-	GO:0006396 [Name: RNA processing]	GO:0005634 [Name: nucleus]; GO:1990904 [Name: ribonucleoprotein complex]	GO:0003723 [Name: RNA binding]	1771.53	0.6998	0.0059	0.0009	up				Os.11166.1.S1_s_at
Os.50326.1.S1_at	LOC_Os03g52280.1	Os03g0733000	4334008	LOC4334008	-	Q6AVH7	expressed protein	-	osa:4334008	-	-	-	-	-	GO:0016021 [Name: integral component of membrane]	-	1360.76	1.4217	0	0	Down			Os.10971.1.S1_at	LOC_Os04g54330.1,LOC_Os04g54330.3	Os04g0635800,Os04g0635800	4337136	LOC4337136	PF00583	Q7XQS0	acetyltransferase, GNAT family, putative, expressed	-	osa:4337136	K00670	-	-	-	GO:0009414 [Name: response to water deprivation]; GO:0017198 [Name: N-terminal peptidyl-serine acetylation]; GO:0018002 [Name: N-terminal peptidyl-glutamic acid acetylation]; GO:0009793 [Name: embryo development ending in seed dormancy]	GO:0031415 [Name: NatA complex]; GO:0005829 [Name: cytosol]	GO:1990189 [Name: peptide-serine-N-acetyltransferase activity]; GO:1990190 [Name: peptide-glutamate-N-acetyltransferase activity]	1776.4	1.4589	0.0058	0.0009	Down				Os.13496.1.S1_at
Os.50438.1.S1_at	LOC_Os02g36530.1	Os02g0575000	4329748	LOC4329748	-	Q69S83	expressed protein	-	osa:4329748	-	-	-	-	-	-	-	79.5411	0.1219	0	0	up			Os.18397.1.S1_at	LOC_Os02g46640.1	Os02g0693200	4330387	LOC4330387	PF00226	Q6Z899	heat shock protein DnaJ, putative, expressed	-	osa:4330387	-	-	-	-	-	GO:0005737 [Name: cytoplasm]; GO:0005634 [Name: nucleus]	-	1769.99	0.6721	0.0058	0.0008	up				Os.18123.1.S1_at
Os.50507.1.S1_at	LOC_Os06g06330.1	Os06g0157800	4340186	LOC4340186	PF07896	Q5VM93	expressed protein	-	osa:4340186	-	-	-	-	GO:0034553 [Name: mitochondrial respiratory chain complex II assembly]; GO:0006099 [Name: tricarboxylic acid cycle]	GO:0005739 [Name: mitochondrion]	-	1569.81	1.518	0	0	Down			Os.26392.1.S1_at	LOC_Os06g04880.1	Os06g0140800	4340071	LOC4340071	PF04564; PF00582; PF00069	Q0DEQ5; Q84P73	serine threonine kinase, putative, expressed	-	osa:4340071	-	-	-	-	-	-	GO:0005524 [Name: ATP binding]; GO:0004672 [Name: protein kinase activity]; GO:0004842 [Name: ubiquitin-protein transferase activity]; GO:0004674 [Name: protein serine/threonine kinase activity]	1769.7	0.6859	0.0058	0.0008	up				Os.18486.1.S1_at
Os.51003.1.S1_at	LOC_Os05g42280.1,LOC_Os05g42280.2	Os05g0502500,Os05g0502500	4339245	LOC4339245	-	Q60EI6	expressed protein	-	osa:4339245	-	-	-	-	-	GO:0016021 [Name: integral component of membrane]	-	1007.92	1.5569	0	0	Down			Os.47746.1.A1_at	LOC_Os07g39730.1,LOC_Os07g39730.2,LOC_Os07g39730.3	Os07g0586000,Os07g0586000,Os07g0586000	9267770	LOC9267770	-	C7J4Y9; B7EG21	ZCW7, putative, expressed	-	osa:9267770	-	-	-	-	-	-	-	1778.14	1.3622	0.0058	0.0009	Down				Os.19114.1.S2_at
Os.51223.1.S1_at	LOC_Os04g57690.1	Os04g0672900	4337370	LOC4337370	PF10058	Q0J944	expressed protein	-	osa:4337370	-	-	-	-	GO:0071786 [Name: endoplasmic reticulum tubular network organization]	GO:0071782 [Name: endoplasmic reticulum tubular network]; GO:0016021 [Name: integral component of membrane]	-	519.263	0.4766	0	0	up			OsAffx.30161.1.S1_s_at	LOC_Os09g36976.1	Os09g0541500	4347731	LOC4347731	PF03143; PF03144; PF00009; PF06916; PF04628	Q10QZ6; Q10RF7; Q7XJ16; O64937; Q651C7; B8BE20; A6N0C3; A6N0I8; E7BJ60; Q9SQI6	trafficking protein particle complex subunit, putative, expressed	-	osa:4331811; osa:4331813; osa:4331812; osa:4331810; osa:4347731	K03231	osa03013	osa03013 [Pathway Title: RNA transport]	-	GO:0006888 [Name: ER to Golgi vesicle-mediated transport]; GO:0006412 [Name: translation]; GO:0006414 [Name: translational elongation]	GO:0005737 [Name: cytoplasm]	GO:0005525 [Name: GTP binding]; GO:0003924 [Name: GTPase activity]; GO:0003746 [Name: translation elongation factor activity]	1778.34	1.2437	0.0058	0.0009	Down				Os.38093.1.S1_at
Os.51236.1.S1_at	LOC_Os07g01114.1,LOC_Os12g42739.1	Os07g0101101,Os12g0622200	9268212	LOC9268212	-	B9FV31	expressed protein	-	osa:9268212	-	-	-	-	-	-	-	1336.06	1.4413	0	0	Down			Os.7038.1.S1_at	LOC_Os11g34360.1	Os11g0546100	4350693	LOC4350693	PF06814	Q2R2X1	lung seven transmembrane domain containing protein, putative, expressed	-	osa:4350693	-	-	-	-	-	GO:0016021 [Name: integral component of membrane]; GO:0005794 [Name: Golgi apparatus]	-	1775.4	1.3586	0.0057	0.0009	Down				Os.51093.1.S1_at
Os.51243.1.S1_at	LOC_Os02g56030.1	Os02g0804400	4331057	LOC4331057	PF08241; PF12589	Q6K851	expressed protein	-	osa:4331057	-	-	-	-	-	GO:0016021 [Name: integral component of membrane]; GO:0009507 [Name: chloroplast]	-	1046.23	1.7081	0	0	Down			Os.12583.1.S1_at	LOC_Os03g16440.1	Os03g0271200	4332389	LOC4332389	PF01103	Q84Q83; Q10NF2	outer membrane protein, OMP85 family, putative, expressed	-	osa:4332389	-	-	-	-	GO:0015031 [Name: protein transport]	GO:0016021 [Name: integral component of membrane]; GO:0009707 [Name: chloroplast outer membrane]	-	1773.18	1.1252	0.0056	0.0009	Down				Os.8293.1.S1_at
Os.51320.1.S1_x_at	LOC_Os12g11830.1,LOC_Os01g43895.1,LOC_Os03g64010.1,LOC_Os09g34340.1,LOC_Os09g34340.1	Os12g0219700,Os01g0629750,Os03g0857100,Os09g0519150,Os09g0519200	4351795	-	-	Q2QVS3	expressed protein	-	osa:4351795	-	-	-	-	-	-	-	1495.82	1.5877	0	0	Down			Os.14253.1.S2_at	LOC_Os04g56350.1	Os04g0658600	4337268	LOC4337268	PF05997	Q0J9E4	nucleolar protein,Nop52 containing protein, expressed	-	osa:4337268	K14849	-	-	-	GO:0006364 [Name: rRNA processing]	GO:0030687 [Name: preribosome, large subunit precursor]; GO:0005634 [Name: nucleus]; GO:0030688 [Name: preribosome, small subunit precursor]	-	1773.39	1.2982	0.0056	0.0009	Down				Os.53773.1.S1_s_at
Os.51760.1.S1_at	LOC_Os03g46730.2,LOC_Os03g46730.3	Os03g0670000,Os03g0670000	4333684	LOC4333684	PF08213	Q10FF2	expressed protein	-	osa:4333684	-	-	-	-	GO:0006397 [Name: mRNA processing]	-	-	564.081	1.8101	0	0	Down			Os.19400.1.S1_at	LOC_Os02g52250.1	Os02g0759800	4330796	LOC4330796	PF02731	A6MZY6; Q6K8D9	SKIP/SNW domain containing protein, expressed	-	osa:4330796	K06063	osa03040	osa03040 [Pathway Title: Spliceosome]	Spliceosome	GO:0000398 [Name: mRNA splicing, via spliceosome]; GO:1902584 [Name: positive regulation of response to water deprivation]; GO:1901002 [Name: positive regulation of response to salt stress]	GO:0005681 [Name: spliceosomal complex]; GO:0005634 [Name: nucleus]	-	1766.56	0.6763	0.0056	0.0008	up				Os.17181.1.S1_at
Os.5202.1.S1_at	LOC_Os01g45439.1,LOC_Os01g45439.2	Os01g0641700,Os01g0641700	4326558	LOC4326558	PF03661	Q5VNW6	expressed protein	-	osa:4326558	-	-	-	-	-	GO:0016021 [Name: integral component of membrane]	-	1340.63	1.9317	0	0	Down			Os.22692.1.S1_at	LOC_Os08g06020.1	Os08g0156700	4344695	LOC4344695	PF00635	Q6ZD98	MSP domain containing protein, expressed	-	osa:4344695	-	-	-	-	-	GO:0016021 [Name: integral component of membrane]; GO:0005789 [Name: endoplasmic reticulum membrane]	-	1774.44	1.3113	0.0056	0.0009	Down				Os.42960.1.S1_x_at
Os.52371.1.S1_at	LOC_Os01g29830.1,LOC_Os01g29830.2	Os01g0393000,Os01g0393000	9268740	LOC9268740	-	Q5VNK2	expressed protein	-	osa:9268740	-	-	-	-	-	-	-	840.166	0.6202	0	0	up			Os.2708.3.S1_at	LOC_Os03g37270.1	Os03g0569900	4333283	LOC4333283	PF00076	Q0DQQ8; Q10HZ8	RNA recognition motif containing protein, putative, expressed	-	osa:4333283	-	-	-	-	-	GO:0005829 [Name: cytosol]	GO:0003723 [Name: RNA binding]; GO:0003729 [Name: mRNA binding]	1772.75	1.1786	0.0056	0.0009	Down				OsAffx.17576.1.S1_s_at
Os.52515.1.S1_at	LOC_Os07g38230.1	Os07g0569600	4343652	LOC4343652	PF02341	Q7XIH6	expressed protein	-	osa:4343652	-	-	-	-	-	GO:0009536 [Name: plastid]	-	620.557	1.2073	0	0	Down			Os.35335.1.A1_s_at	LOC_Os04g54800.1,LOC_Os04g54800.2,LOC_Os04g54800.3	Os04g0640600,Os04g0640600,Os04g0640600	4337165	LOC4337165	PF01202	B8AV75; Q7X7H9	shikimate kinase, putative, expressed	-	osa:4337165	K00891	osa01130; osa00400; osa01100; osa01110; osa01230	osa01230 [Pathway Title: Biosynthesis of amino acids]; osa01100 [Pathway Title: Metabolic pathways]; osa00400 [Pathway Title: Phenylalanine, tyrosine and tryptophan biosynthesis]; osa01110 [Pathway Title: Biosynthesis of secondary metabolites]; osa01130 [Pathway Title: Biosynthesis of antibiotics]	Phenylalanine, tyrosine and tryptophan biosynthesis; Biosynthesis of amino acids; Biosynthesis of secondary metabolites; Metabolic pathways; Biosynthesis of antibiotics	GO:0009073 [Name: aromatic amino acid family biosynthetic process]; GO:0019632 [Name: shikimate metabolic process]; GO:0009423 [Name: chorismate biosynthetic process]	GO:0009536 [Name: plastid]; GO:0009507 [Name: chloroplast]	GO:0004765 [Name: shikimate kinase activity]; GO:0005524 [Name: ATP binding]; GO:0000287 [Name: magnesium ion binding]	1773.91	1.076	0.0056	0.0009	Down				Os.26553.1.S1_s_at
Os.52532.1.S1_x_at	LOC_Os09g34340.1,LOC_Os09g34340.1,LOC_Os01g43895.1,LOC_Os03g64010.1,LOC_Os12g11830.1	Os09g0519150,Os09g0519200,Os01g0629750,Os03g0857100,Os12g0219700	4347602	P0498F03.16	-	Q69IT9	expressed protein	-	osa:4347602	-	-	-	-	-	-	-	1346.21	1.6852	0	0	Down			Os.52206.1.S1_at	LOC_Os05g07670.1	Os05g0168700	4337925	LOC4337925	PF03151	Q60DT9; Q9AV91	solute carrier family 35 member E3, putative, expressed	-	osa:4337925	K15285	-	-	-	-	GO:0016021 [Name: integral component of membrane]; GO:0005794 [Name: Golgi apparatus]	GO:0022857 [Name: transmembrane transporter activity]; GO:0005338 [Name: nucleotide-sugar transmembrane transporter activity]; GO:0015297 [Name: antiporter activity]; GO:0005464 [Name: UDP-xylose transmembrane transporter activity]	1774.1	1.3094	0.0056	0.0009	Down				Os.5547.1.S1_s_at
Os.52552.1.S1_at	LOC_Os06g22390.1	Os06g0329300	4340917	LOC4340917	-	Q69UY7	expressed protein	-	osa:4340917	-	-	-	-	-	-	-	885.248	2.0216	0	0	Down			Os.5253.1.S1_at	LOC_Os02g34950.1	Os02g0555000	4329653	LOC4329653	PF03029	Q69ST5	ATP binding protein, putative, expressed	-	osa:4329653	K06883	-	-	-	GO:0051301 [Name: cell division]; GO:0009658 [Name: chloroplast organization]; GO:1902182 [Name: shoot apical meristem development]; GO:0009793 [Name: embryo development ending in seed dormancy]	GO:0005874 [Name: microtubule]	GO:0003924 [Name: GTPase activity]; GO:0005525 [Name: GTP binding]	1767.37	0.6968	0.0056	0.0008	up				Os.6362.1.S1_at
Os.52778.1.S1_at	LOC_Os02g50810.2,LOC_Os02g50810.1	Os02g0741700,Os02g0741700	4330688	LOC4330688	PF14009	Q0DXP1	expressed protein	-	osa:4330688	-	-	-	-	-	-	-	862.73	0.7668	0	0	up			Os.7792.1.S1_at	LOC_Os04g37690.1	Os04g0449900	4335992	LOC4335992	PF00076	A6N0J4; A6N173; Q0JCT9	RNA recognition motif containing protein, putative, expressed	-	osa:4335992	-	-	-	-	-	GO:0005829 [Name: cytosol]	GO:0003723 [Name: RNA binding]; GO:0003729 [Name: mRNA binding]	1765.98	0.6996	0.0056	0.0008	up				Os.11357.1.S1_at
Os.5292.1.S1_at	LOC_Os03g63040.1,LOC_Os03g63040.1	Os03g0847800,Os03g0847851	-	-	-	-	expressed protein	-	-	-	-	-	-	-	-	-	637.868	0.4774	0	0	up			Os.12104.1.S1_at	LOC_Os08g33160.1,LOC_Os08g33160.2	Os08g0428400,Os08g0428400	4345625	LOC4345625	PF06200; PF09425	Q6ZJU3	ZIM motif family protein, expressed	-	osa:4345625	K13464	osa04075	osa04075 [Pathway Title: Plant hormone signal transduction]	Plant hormone signal transduction	GO:0009611 [Name: response to wounding]; GO:2000022 [Name: regulation of jasmonic acid mediated signaling pathway]; GO:0031347 [Name: regulation of defense response]	GO:0005634 [Name: nucleus]	-	1771.71	1.2672	0.0055	0.0009	Down				Os.8007.1.S1_at
Os.53016.1.S1_at	LOC_Os03g16580.1	Os03g0272400	4332397	LOC4332397	-	Q10ND9	expressed protein	-	osa:4332397	-	-	-	-	GO:0051457 [Name: maintenance of protein location in nucleus]; GO:0009639 [Name: response to red or far red light]; GO:0009416 [Name: response to light stimulus]	GO:0005737 [Name: cytoplasm]; GO:0005634 [Name: nucleus]	-	1335.84	1.7538	0	0	Down			Os.15913.1.S1_a_at	LOC_Os02g37880.1,LOC_Os02g37880.2,LOC_Os02g37880.3	Os02g0591900,Os02g0591900,Os02g0591900	4329833	LOC4329833	PF00069	Q0DZY4; Q69L76	cyclin G-associated kinase, putative, expressed	-	osa:4329833	-	-	-	-	GO:0006468 [Name: protein phosphorylation]; GO:0030100 [Name: regulation of endocytosis]	-	GO:0004674 [Name: protein serine/threonine kinase activity]; GO:0005524 [Name: ATP binding]	1762.64	0.7418	0.0054	0.0008	up				Os.8437.1.S1_at
Os.53519.1.S1_at	LOC_Os11g04990.1,LOC_Os11g04990.2	Os11g0147100,Os11g0147100	4349765	LOC4349765	PF13902	Q2RAL5	expressed protein	-	osa:4349765	-	-	-	-	-	-	GO:0003676 [Name: nucleic acid binding]	1107.14	1.8434	0	0	Down			Os.44821.1.A1_x_at	LOC_Os06g02620.1	Os06g0116800	4339933	LOC4339933	PF01556; PF00226; PF00684	Q5VRK6	chaperone protein dnaJ, putative, expressed	-	osa:4339933	K03686	-	-	-	GO:0010197 [Name: polar nucleus fusion]; GO:0042026 [Name: protein refolding]; GO:0009408 [Name: response to heat]; GO:0009558 [Name: embryo sac cellularization]; GO:0051085 [Name: chaperone mediated protein folding requiring cofactor]; GO:0010198 [Name: synergid death]; GO:0000740 [Name: nuclear membrane fusion]	GO:0005737 [Name: cytoplasm]; GO:0005739 [Name: mitochondrion]	GO:0031072 [Name: heat shock protein binding]; GO:0051082 [Name: unfolded protein binding]; GO:0005524 [Name: ATP binding]; GO:0046872 [Name: metal ion binding]	1763.11	0.761	0.0054	0.0008	up				Os.10951.1.S1_at
Os.53669.1.S1_at	LOC_Os04g36630.1	Os04g0443700	4335947	LOC4335947	-	B8AUC0; Q7X8Q0; Q7F9D9	expressed protein	-	osa:4335947	-	-	-	-	-	GO:0016021 [Name: integral component of membrane]	-	1477.05	0.6686	0	0	up			Os.9.1.S1_at	LOC_Os01g55540.1,LOC_Os01g55540.2	Os01g0760600,Os01g0760600	4325621	LOC4325621	PF00155	Q0JJ47; A2WVA6; A1YQJ2; P37833	aminotransferase, classes I and II, domain containing protein, expressed	-	osa:4325621	K14454	osa00330; osa00710; osa01130; osa00350; osa01200; osa00360; osa01230; osa01210; osa00220; osa00250; osa00400; osa01100; osa00270; osa00950; osa00960; osa01110	osa00220 [Pathway Title: Arginine biosynthesis]; osa00250 [Pathway Title: Alanine, aspartate and glutamate metabolism]; osa00350 [Pathway Title: Tyrosine metabolism]; osa00400 [Pathway Title: Phenylalanine, tyrosine and tryptophan biosynthesis]; osa00950 [Pathway Title: Isoquinoline alkaloid biosynthesis]; osa00960 [Pathway Title: Tropane, piperidine and pyridine alkaloid biosynthesis]; osa00270 …	Biosynthesis of secondary metabolites; Carbon metabolism; Carbon fixation in photosynthetic organisms; Arginine biosynthesis; Tyrosine metabolism; Metabolic pathways; Biosynthesis of amino acids; Alanine, aspartate and glutamate metabolism; Biosynthesis of antibiotics; Phenylalanine, tyrosine and tryptophan biosynthesis; Isoquinoline alkaloid biosynthesis; Tropane, piperidine and pyridine alkaloi…	GO:0006520 [Name: cellular amino acid metabolic process]; GO:0009058 [Name: biosynthetic process]; GO:0006531 [Name: aspartate metabolic process]; GO:0006103 [Name: 2-oxoglutarate metabolic process]; GO:0006536 [Name: glutamate metabolic process]; GO:0006099 [Name: tricarboxylic acid cycle]; GO:0006807 [Name: nitrogen compound metabolic process]; GO:0006522 [Name: alanine metabolic process]	GO:0005737 [Name: cytoplasm]	GO:0030170 [Name: pyridoxal phosphate binding]; GO:0004069 [Name: L-aspartate:2-oxoglutarate aminotransferase activity]	1762.53	0.7419	0.0054	0.0008	up				Os.11117.1.S1_at
Os.53705.1.S1_at	LOC_Os06g45060.1	Os06g0661500	4341746	LOC4341746	-	Q651U6	expressed protein	-	osa:4341746	-	-	-	-	-	-	-	810.029	0.5604	0	0	up			Os.9309.1.S1_at	LOC_Os08g31810.1,LOC_Os08g31810.2,LOC_Os08g31810.3	Os08g0412200,Os08g0412200,Os08g0412200	4345558	LOC4345558	PF00076	Q70KT2; Q6Z568	RNA recognition motif containing protein, putative, expressed	-	osa:4345558	K14838	-	-	-	-	GO:0005730 [Name: nucleolus]	GO:0003723 [Name: RNA binding]	1763.88	0.7069	0.0054	0.0008	up				Os.13543.1.S1_at
Os.54006.1.S1_at	LOC_Os04g27950.1	Os04g0346800	4335533	LOC4335533	PF12643	B7ERH6; Q0JE10	expressed protein	-	osa:4335533	-	-	-	-	GO:0009143 [Name: nucleoside triphosphate catabolic process]	-	GO:0047429 [Name: nucleoside-triphosphate diphosphatase activity]	711.982	0.5783	0	0	up			Os.14003.1.A1_x_at	LOC_Os09g29825.1	Os09g0474051	-	-	PF01535; PF12854; PF13041; PF14432	B8BCQ1	pentatricopeptide, putative, expressed	-	-	-	-	-	-	-	-	GO:0008270 [Name: zinc ion binding]	1768.75	1.2848	0.0053	0.0008	Down				Os.14366.1.S1_at
Os.5413.1.S1_at	LOC_Os04g33860.1	Os04g0415000	4335802	LOC4335802	-	Q7XTG2	expressed protein	-	osa:4335802	-	-	-	-	-	-	-	1347.84	1.742	0	0	Down			Os.26721.1.S1_at	LOC_Os10g26050.1,LOC_Os10g26050.2,LOC_Os10g26050.3,LOC_Os10g26050.4	Os10g0400100,Os10g0400100,Os10g0400100,Os10g0400100	4348562	LOC4348562	PF09334	B8BGP6; Q109Q2; Q338J3; Q338J4; Q94I35	methionyl-tRNA synthetase, putative, expressed	-	osa:4348562	K01874	osa00450; osa00970	osa00450 [Pathway Title: Selenocompound metabolism]; osa00970 [Pathway Title: Aminoacyl-tRNA biosynthesis]	Aminoacyl-tRNA biosynthesis; Selenocompound metabolism	GO:0006431 [Name: methionyl-tRNA aminoacylation]	GO:0005829 [Name: cytosol]	GO:0004825 [Name: methionine-tRNA ligase activity]; GO:0005524 [Name: ATP binding]	1769.07	1.2312	0.0053	0.0008	Down				Os.15700.1.S1_at
Os.5432.1.A1_at	LOC_Os02g57030.1	Os02g0815400	4331129	LOC4331129	-	Q6K6C2	expressed protein	-	osa:4331129	-	-	-	-	-	GO:0009507 [Name: chloroplast]; GO:0009535 [Name: chloroplast thylakoid membrane]; GO:0016021 [Name: integral component of membrane]	-	1169.53	1.2731	0	0	Down			Os.27739.1.A1_at	LOC_Os02g03470.1	Os02g0127000	4328161	LOC4328161	-	Q6Z2M2	tetratricopeptide repeat containing protein, putative, expressed	-	osa:4328161	-	-	-	-	-	-	-	1768.04	1.3601	0.0053	0.0008	Down				Os.18412.2.S1_x_at
Os.54420.1.S1_x_at	LOC_Os01g16980.1	Os01g0276900	9271754	LOC9271754	-	Q5NBP8	expressed protein	-	osa:9271754	-	-	-	-	-	GO:0031410 [Name: cytoplasmic vesicle]	-	1594.15	0.9834	0	0	Down			Os.9290.1.A1_at	LOC_Os12g06850.1,LOC_Os12g06850.2,LOC_Os12g06850.3,LOC_Os12g06850.4	Os12g0165700,Os12g0165700,Os12g0165700,Os12g0165700	4351596	LOC4351596	PF08711	Q2QX87	transcription elongation factor protein, putative, expressed	-	osa:4351596	-	-	-	-	-	GO:0005634 [Name: nucleus]	GO:0003746 [Name: translation elongation factor activity]	1768.48	1.3713	0.0053	0.0008	Down				Os.26449.1.S1_at
Os.54627.1.S1_at	LOC_Os03g19040.1,LOC_Os05g28840.1	Os03g0302500,Os05g0356800	4332582	LOC4332582	PF12023	Q10MM9	expressed protein	-	osa:4332582	-	-	-	-	-	-	-	1355.56	1.9482	0	0	Down			Os.10042.1.S1_at	LOC_Os09g26400.1	Os09g0434200	4347141	LOC4347141	PF13639	Q69PH7	zinc finger, C3HC4 type domain containing protein, expressed	-	osa:4347141	K16274	-	-	-	-	GO:0005739 [Name: mitochondrion]	-	1758.62	0.643	0.0052	0.0008	up				Os.27578.1.S1_at
Os.54824.1.S1_at	LOC_Os03g14500.1	Os03g0249100	4332254	LOC4332254	-	Q10P30	expressed protein	-	osa:4332254	-	-	-	-	-	-	-	214.557	0.3464	0	0	up			Os.18776.1.S1_at	LOC_Os06g43270.1	Os06g0639500	4341621	LOC4341621	PF07714	Q67WD3	protein kinase domain containing protein, expressed	-	osa:4341621	-	-	-	-	GO:0009704 [Name: de-etiolation]; GO:1904216 [Name: positive regulation of protein import into chloroplast stroma]	GO:0010006 [Name: Toc complex]; GO:0031359 [Name: integral component of chloroplast outer membrane]	GO:0004672 [Name: protein kinase activity]; GO:0005524 [Name: ATP binding]	1758.65	0.7213	0.0052	0.0008	up				Os.27655.1.A1_a_at
Os.55247.1.S1_at	LOC_Os05g50100.1	Os05g0576600	4339695	LOC4339695	-	Q6L5F9	expressed protein	-	osa:4339695	-	-	-	-	-	-	-	645.427	0.5418	0	0	up			Os.9636.1.S1_s_at	LOC_Os02g44810.1	Os02g0668400	4330262	LOC4330262	PF01416	Q6ESS0	tRNA pseudouridine synthase family protein, putative, expressed	-	osa:4330262	K06173	-	-	-	GO:0031119 [Name: tRNA pseudouridine synthesis]; GO:1990481 [Name: mRNA pseudouridine synthesis]	GO:0005634 [Name: nucleus]	GO:0009982 [Name: pseudouridine synthase activity]; GO:0003723 [Name: RNA binding]	1767.07	1.128	0.0052	0.0008	Down				Os.46757.1.S1_s_at
Os.55270.1.S1_s_at	LOC_Os04g54210.1	Os04g0634800	4337127	LOC4337127	PF12609	Q7XQT1	expressed protein	-	osa:4337127	-	-	-	-	-	-	-	844.089	0.4044	0	0	up			Os.21077.1.S1_at	LOC_Os08g21840.1	Os08g0310100	4345238	LOC4345238	PF00828	Q6UUH5	50S ribosomal protein L15, putative, expressed	-	osa:4345238	K02876	osa03010	osa03010 [Pathway Title: Ribosome]	Ribosome	GO:0006412 [Name: translation]	GO:0005762 [Name: mitochondrial large ribosomal subunit]	GO:0003735 [Name: structural constituent of ribosome]	1764.55	1.2748	0.0051	0.0008	Down				Os.12975.1.S1_at
Os.55325.1.S1_at	LOC_Os06g04140.1	Os06g0132300	4340014	LOC4340014	-	Q9SNL9	expressed protein	-	osa:4340014	-	-	-	-	-	-	-	432.635	2.3975	0	0	Down			Os.23458.1.A1_x_at	LOC_Os05g02220.1,LOC_Os05g02220.2,LOC_Os05g02220.3,LOC_Os05g02220.4,LOC_Os05g02220.5	Os05g0113000,Os05g0113000,Os05g0113000,Os05g0113000,Os05g0113000	4337602	LOC4337602	PF01842	Q75L16	ACT domain containing protein, expressed	-	osa:4337602	-	-	-	-	-	-	-	1765.89	1.2748	0.0051	0.0008	Down				Os.17405.1.S1_a_at
Os.55362.1.S1_at	LOC_Os01g71262.1	Os01g0939400	4326510	LOC4326510	-	Q5JLP8	expressed protein	-	osa:4326510	-	-	-	-	-	-	-	863.374	1.8734	0	0	Down			Os.26397.1.S1_at	LOC_Os06g39906.1	Os06g0601000	4341453	LOC4341453	PF00046	A6N087; Q84P83; Q69XL0	homeobox domain containing protein, expressed	HB-other	osa:4341453	-	-	-	-	GO:0009867 [Name: jasmonic acid mediated signaling pathway]; GO:0050832 [Name: defense response to fungus]; GO:0009738 [Name: abscisic acid-activated signaling pathway]; GO:0010118 [Name: stomatal movement]; GO:0002229 [Name: defense response to oomycetes]; GO:0009787 [Name: regulation of abscisic acid-activated signaling pathway]; GO:0009682 [Name: induced systemic resistance]; GO:0009414 [Name:…	GO:0005634 [Name: nucleus]	GO:0003677 [Name: DNA binding]	1764.06	1.2387	0.0051	0.0008	Down				Os.22788.1.S1_at
Os.55676.1.S1_at	LOC_Os01g65992.1	Os01g0882400	4324997	LOC4324997	PF05078	Q5N7I6	expressed protein	-	osa:4324997	-	-	-	-	-	GO:0016021 [Name: integral component of membrane]	-	505.281	0.3959	0	0	up			Os.37979.2.S1_at	LOC_Os10g35010.1,LOC_Os10g35010.1	Os10g0492000,Os10g0492101	-	-	PF16940	A2Z8U8	ATTIC110/TIC110, putative, expressed	-	-	-	-	-	-	GO:0009658 [Name: chloroplast organization]; GO:0045037 [Name: protein import into chloroplast stroma]	GO:0016020 [Name: membrane]; GO:0009941 [Name: chloroplast envelope]	-	1765.47	1.2905	0.0051	0.0008	Down				Os.4717.1.S1_at
Os.5592.1.S1_at	LOC_Os02g48710.1	Os02g0718600	4330538	-	-	Q0DY34; Q6ZGX3	expressed protein	-	osa:4330538	-	-	-	-	-	GO:0016021 [Name: integral component of membrane]	-	1456.24	0.8255	0	0	up			Os.3838.1.S1_at	LOC_Os01g13540.1	Os01g0236700	4327787	LOC4327787	PF02042; PF00564	Q5NB82	NIN, putative, expressed	Nin-like	osa:4327787	-	-	-	-	-	GO:0005634 [Name: nucleus]	GO:0003677 [Name: DNA binding]	1764.23	1.3954	0.0051	0.0008	Down				Os.7947.1.S1_x_at
Os.57367.1.S1_x_at	LOC_Os05g49910.2,LOC_Os05g49910.3,LOC_Os05g49910.1	Os05g0574700,Os05g0574700,Os05g0574700	4339685	LOC4339685	-	Q0DFR7; B7F3P2	expressed protein	-	osa:4339685	-	-	-	-	-	GO:0009536 [Name: plastid]	-	1531.35	1.3716	0	0	Down			Os.5557.1.S1_at	LOC_Os03g02514.1,LOC_Os03g02514.2,LOC_Os03g02514.2	Os03g0116300,Os03g0116300,Os03g0116316	9267662	LOC9267662	PF12697	Q10SN6; C7IZX0	hydrolase, alpha/beta fold family protein, putative, expressed	-	osa:9267662	-	-	-	-	-	-	GO:0016787 [Name: hydrolase activity]	1764.75	1.0138	0.0051	0.0008	Down				Os.27424.1.S1_at
Os.5782.1.S1_at	LOC_Os03g45870.1	Os03g0660700	4333631	LOC4333631	-	Q75GQ2	expressed protein	-	osa:4333631	-	-	-	-	-	-	-	1399.27	0.8009	0	0	up			Os.6087.1.S1_at	LOC_Os09g26700.1	Os09g0438400	4347160	LOC4347160	PF01633	Q0J1I2	choline/ethanolamine kinase, putative, expressed	-	osa:4347160	K00894	osa00564; osa01100	osa00564 [Pathway Title: Glycerophospholipid metabolism]; osa01100 [Pathway Title: Metabolic pathways]	Glycerophospholipid metabolism; Metabolic pathways	-	-	-	1757.69	0.6384	0.0051	0.0007	up				Os.5164.1.S1_at
Os.5936.1.S1_at	LOC_Os06g43870.2	Os06g0646700	4341662	LOC4341662	-	Q67W55	expressed protein	MYB	osa:4341662	-	-	-	-	-	-	-	339.085	0.3381	0	0	up			Os.15047.1.S1_s_at	LOC_Os08g01350.1,LOC_Os08g01350.2	Os08g0104100,Os08g0104100	4344436	LOC4344436	PF14770	Q69U50	transmembrane protein 18, putative, expressed	-	osa:4344436	-	-	-	-	-	GO:0016021 [Name: integral component of membrane]	-	1755.61	0.6654	0.005	0.0007	up				Os.15731.1.S1_at
Os.6138.1.S1_at	LOC_Os01g05560.1	Os01g0148700	4325217	LOC4325217	PF07893	Q5ZED9	expressed protein	-	osa:4325217	-	-	-	-	-	-	-	633.979	1.8141	0	0	Down			Os.20010.1.S1_at	LOC_Os07g12490.1,LOC_Os07g12490.2	Os07g0227400,Os07g0227400	4342758	LOC4342758	PF00013; PF16544	Q8H2M0	KH domain containing protein, putative, expressed	-	osa:4342758	K14945	-	-	-	-	-	GO:0003723 [Name: RNA binding]	1754.68	0.7293	0.005	0.0007	up				Os.26501.1.S1_at
Os.6231.1.S1_at	LOC_Os11g34080.1	Os11g0543100	4350671	LOC4350671	-	Q2R304	expressed protein	-	osa:4350671	-	-	-	-	-	-	-	882.993	0.5631	0	0	up			Os.27769.1.S1_a_at	LOC_Os12g36950.1,LOC_Os12g36950.3	Os12g0556600,Os12g0556600	4352499	LOC4352499	PF00117; PF06418	Q0IMP1; Q2QNR9	CTP synthase, putative, expressed	-	osa:4352499	K01937	osa01100; osa00240	osa00240 [Pathway Title: Pyrimidine metabolism]; osa01100 [Pathway Title: Metabolic pathways]	Pyrimidine metabolism; Metabolic pathways	GO:0006541 [Name: glutamine metabolic process]; GO:0044210 [Name: 'de novo' CTP biosynthetic process]; GO:0006241 [Name: CTP biosynthetic process]; GO:0019856 [Name: pyrimidine nucleobase biosynthetic process]	-	GO:0042802 [Name: identical protein binding]; GO:0003883 [Name: CTP synthase activity]; GO:0005524 [Name: ATP binding]	1753.95	0.7075	0.005	0.0007	up				Os.6876.1.S1_at
Os.6343.1.S1_at	LOC_Os04g42174.1,LOC_Os04g42174.2	Os04g0499800,Os04g0499800	9267791	LOC9267791	-	C7J145	expressed protein	-	osa:9267791	-	-	-	-	-	GO:0016021 [Name: integral component of membrane]	-	1619.2	1.1056	0	0	Down			Os.37813.1.S1_at	LOC_Os10g39130.1,LOC_Os10g39130.2	Os10g0536100,Os10g0536100	4349237	LOC4349237	PF01486; PF00319	A2Z9Q7; B7EHE1; P0C5B2; B1Q0C6	OsMADS56 - MADS-box family gene with MIKCc type-box, expressed	MIKC_MADS	osa:4349237	-	-	-	-	GO:0045944 [Name: positive regulation of transcription from RNA polymerase II promoter]; GO:0007275 [Name: multicellular organism development]	GO:0005634 [Name: nucleus]	GO:0000977 [Name: RNA polymerase II regulatory region sequence-specific DNA binding]; GO:0003700 [Name: transcription factor activity, sequence-specific DNA binding]; GO:0046983 [Name: protein dimerization activity]; GO:0008134 [Name: transcription factor binding]; GO:0044212 [Name: transcription regulatory region DNA binding]; GO:0043565 [Name: sequence-specific DNA binding]	1762.1	1.3648	0.005	0.0008	Down				Os.39943.1.S1_s_at
Os.6407.1.S1_at	LOC_Os05g06014.1,LOC_Os05g06014.2	Os05g0152201,Os05g0152201	9268040	LOC9268040	-	C7J2V3	expressed protein	-	osa:9268040	-	-	-	-	-	-	-	959.506	1.5818	0	0	Down			OsAffx.14935.1.S1_at	LOC_Os05g33290.1	Os05g0401200	4338730	LOC4338730	PF11317	B9FIC8; A2Y4H0; Q0DIC2	uncharacterized conserved membrane protein specific to cyanobacteria, putative, expressed	-	osa:4338730	-	-	-	-	-	GO:0009536 [Name: plastid]	-	1762.23	1.3377	0.005	0.0008	Down				Os.6825.1.S1_at
Os.6440.1.S1_at	LOC_Os02g29400.1	Os02g0496900	4329408	LOC4329408	PF04281	Q6K929	expressed protein	-	osa:4329408	K17769	-	-	-	GO:0006886 [Name: intracellular protein transport]	GO:0016021 [Name: integral component of membrane]; GO:0005741 [Name: mitochondrial outer membrane]	-	250.512	2.5812	0	0	Down			Os.11924.1.S1_at	LOC_Os12g41820.1	Os12g0612400	4352775	LOC4352775	PF14901; PF00226	Q2QMA0	heat shock protein DnaJ, putative, expressed	-	osa:4352775	K09534	-	-	-	-	GO:0016021 [Name: integral component of membrane]	-	1759.77	1.4009	0.0049	0.0008	Down				Os.1577.1.S1_at
Os.6537.1.S1_at	LOC_Os01g43420.1	Os01g0622700	4326639	LOC4326639	-	Q9AXA6; B8ABY3; B9EY46; Q0JL51	expressed protein	-	osa:4326639	-	-	-	-	-	GO:0005737 [Name: cytoplasm]; GO:0005856 [Name: cytoskeleton]	-	1184.75	0.6831	0	0	up			Os.15669.1.S1_at	LOC_Os08g23730.1	Os08g0326600	4345281	LOC4345281	PF00958; PF00117	A6MZN4; Q8H4X9	class I glutamine amidotransferase, putative, expressed	-	osa:4345281	K01951	osa00230; osa01100	osa01100 [Pathway Title: Metabolic pathways]; osa00230 [Pathway Title: Purine metabolism]	Purine metabolism; Metabolic pathways	GO:0006177 [Name: GMP biosynthetic process]; GO:0006541 [Name: glutamine metabolic process]	GO:0005829 [Name: cytosol]	GO:0003922 [Name: GMP synthase (glutamine-hydrolyzing) activity]; GO:0005524 [Name: ATP binding]; GO:0016462 [Name: pyrophosphatase activity]; GO:0003921 [Name: GMP synthase activity]	1761.43	1.2796	0.0049	0.0008	Down				Os.7339.1.S1_at
Os.6641.1.S1_at	LOC_Os11g16320.1	Os11g0264600	4350240	LOC4350240	-	Q0ITE8; A6MZP6; Q53LT9	expressed protein	-	osa:4350240	-	-	-	-	-	GO:0016021 [Name: integral component of membrane]	-	460.684	2.5119	0	0	Down			Os.46267.1.S1_x_at	LOC_Os04g16824.1,LOC_Os08g15272.1,LOC_Os09g19952.1,LOC_Os09g24416.1,LOC_Os10g21346.1	None,None,None,None,None	9272040	rpl22; rps3	PF00237; PF00189	B9G372; P0C444; P0C446; B8B5K8	chloroplast 30S ribosomal protein S3, putative, expressed	-	osa:3131426	K02890	osa03010	osa03010 [Pathway Title: Ribosome]	Ribosome	GO:0006412 [Name: translation]; GO:0042255 [Name: ribosome assembly]	GO:0009507 [Name: chloroplast]; GO:0015934 [Name: large ribosomal subunit]; GO:0015935 [Name: small ribosomal subunit]	GO:0019843 [Name: rRNA binding]; GO:0003735 [Name: structural constituent of ribosome]; GO:0003723 [Name: RNA binding]	1753.55	0.8479	0.0049	0.0007	up				Os.14102.1.S1_at
Os.6730.1.S1_at	LOC_Os06g19750.1	Os06g0301500	4340830	-	-	Q5Z5D5	expressed protein	-	osa:4340830	-	-	-	-	-	-	-	1161.95	1.7141	0	0	Down			Os.28384.1.S1_at	LOC_Os06g41010.1,LOC_Os06g41010.3,LOC_Os06g41010.4	Os06g0612800,Os06g0612800,Os06g0612800	4341520	LOC4341520	PF01754; PF01428	A6N1K3; A2YEZ6; B7E4H0; A3BDI8	zinc finger A20 and AN1 domain-containing stress-associated protein, putative, expressed	-	osa:4341520	-	-	-	-	-	-	GO:0003677 [Name: DNA binding]; GO:0008270 [Name: zinc ion binding]	1752.18	0.6938	0.0048	0.0007	up				Os.15252.1.S1_a_at
Os.6766.1.S1_s_at	LOC_Os04g48840.1	Os04g0577800	4336748	LOC4336748	PF03647	A2XWP4; B7FAK3; Q7XQ86	expressed protein	-	osa:4336748	-	-	-	-	-	GO:0016021 [Name: integral component of membrane]	-	1482.16	0.7557	0	0	up			Os.6724.1.S1_at	LOC_Os03g26460.1,LOC_Os03g26460.2	Os03g0381300,Os03g0381300	4332979	LOC4332979	PF04969	Q75M67	CS domain containing protein, putative, expressed	-	osa:4332979	-	-	-	-	GO:0006457 [Name: protein folding]; GO:0051131 [Name: chaperone-mediated protein complex assembly]	GO:0005829 [Name: cytosol]; GO:0005737 [Name: cytoplasm]; GO:0005634 [Name: nucleus]	GO:0051087 [Name: chaperone binding]; GO:0051879 [Name: Hsp90 protein binding]	1751.58	0.7485	0.0048	0.0007	up				Os.178.1.S1_a_at
Os.6768.1.S1_at	LOC_Os01g37950.1	Os01g0559900	4324685	AGPEP2	-	A9UGV6	expressed protein	-	osa:4324685	-	-	-	-	-	GO:0032578 [Name: aleurone grain membrane]; GO:0031225 [Name: anchored component of membrane]; GO:0005773 [Name: vacuole]	-	694.178	1.9862	0	0	Down			Os.8764.1.A1_a_at	LOC_Os11g42420.1,LOC_Os11g42420.2	Os11g0643700,Os11g0643700	4351012	LOC4351012	PF04121	Q0IRE2; B8B3P8; Q2R0I9	nuclear pore protein 84/107 containing protein, expressed	-	osa:4351012	-	-	-	-	GO:0000973 [Name: posttranscriptional tethering of RNA polymerase II gene DNA at nuclear periphery]; GO:0006606 [Name: protein import into nucleus]; GO:0006406 [Name: mRNA export from nucleus]	GO:0031965 [Name: nuclear membrane]; GO:0031080 [Name: nuclear pore outer ring]	GO:0017056 [Name: structural constituent of nuclear pore]	1752.21	0.7199	0.0048	0.0007	up				Os.54125.1.S1_at
Os.7046.1.S1_at	LOC_Os08g33460.1	Os08g0431500	4345641	LOC4345641	PF10785	A3BTD8; Q0J5I8	expressed protein	-	osa:4345641	-	-	-	-	-	GO:0016021 [Name: integral component of membrane]; GO:0005747 [Name: mitochondrial respiratory chain complex I]	-	745.423	1.6996	0	0	Down			Os.8939.1.S1_s_at	LOC_Os02g02920.1,LOC_Os02g02920.2	Os02g0121600,Os02g0121600	4328123	LOC4328123	PF03134	Q0E4F5	HVA22, putative, expressed	-	osa:4328123	-	-	-	-	-	GO:0009536 [Name: plastid]	-	1751.74	0.6436	0.0048	0.0007	up				Os.6328.1.S1_at
Os.7068.1.S1_at	LOC_Os03g60950.1,LOC_Os03g60950.2	Os03g0824500,Os03g0824500	4334627	OSJNBb0081B07.2	-	Q852C1	expressed protein	-	osa:4334627	-	-	-	-	-	GO:0016021 [Name: integral component of membrane]	-	1389.53	1.2875	0	0	Down			Os.2622.1.S1_at	LOC_Os03g06410.1	Os03g0160100	4331696	LOC4331696	PF07714	Q10RG4; Q7XYY6; Q9FPR5	protein kinase domain containing protein, expressed	-	osa:4331696	-	-	-	-	GO:0006468 [Name: protein phosphorylation]	GO:0005739 [Name: mitochondrion]; GO:0009536 [Name: plastid]	GO:0004672 [Name: protein kinase activity]; GO:0005524 [Name: ATP binding]	1749.53	0.6917	0.0047	0.0007	up				Os.5599.1.S1_at
Os.7153.1.S1_at	LOC_Os12g34880.1	Os12g0534100	4352412	LOC4352412	-	Q2QPD2	expressed protein	-	osa:4352412	-	-	-	-	-	GO:0009536 [Name: plastid]	-	1158.11	0.7587	0	0	up			Os.46583.1.S1_s_at	LOC_Os06g05180.3,LOC_Os06g05180.4	Os06g0143900,Os06g0143900	4340097	LOC4340097	PF00400; PF04053	Q5VQ78	coatomer subunit beta, putative, expressed	-	osa:4340097	K17302	-	-	-	GO:0006886 [Name: intracellular protein transport]; GO:0006888 [Name: ER to Golgi vesicle-mediated transport]; GO:0006891 [Name: intra-Golgi vesicle-mediated transport]; GO:0006890 [Name: retrograde vesicle-mediated transport, Golgi to ER]	GO:0000139 [Name: Golgi membrane]; GO:0030126 [Name: COPI vesicle coat]	GO:0005198 [Name: structural molecule activity]	1755.74	1.3002	0.0047	0.0007	Down				Os.12410.1.S1_x_at
Os.7219.1.S1_at	LOC_Os09g11240.1	Os09g0284300	4346620	LOC4346620	-	Q6EPR5	expressed protein	-	osa:4346620	-	-	-	-	-	-	-	1488.11	1.487	0	0	Down			Os.4772.1.S1_at	LOC_Os06g35540.1	Os06g0548000	4341252	LOC4341252	PF00155	O48599; Q0DBN4	aminotransferase, classes I and II, domain containing protein, expressed	-	osa:4341252	K14455	osa00960; osa01200; osa00710; osa01210; osa00360; osa00220; osa00250; osa00330; osa00400; osa01110; osa00950; osa01130; osa01230; osa00270; osa00350; osa01100	osa00330 [Pathway Title: Arginine and proline metabolism]; osa01130 [Pathway Title: Biosynthesis of antibiotics]; osa00270 [Pathway Title: Cysteine and methionine metabolism]; osa00710 [Pathway Title: Carbon fixation in photosynthetic organisms]; osa00360 [Pathway Title: Phenylalanine metabolism]; osa01100 [Pathway Title: Metabolic pathways]; osa01110 [Pathway Title: Biosynthesis of secondary met…	Tyrosine metabolism; Carbon fixation in photosynthetic organisms; 2-Oxocarboxylic acid metabolism; Biosynthesis of secondary metabolites; Biosynthesis of amino acids; Metabolic pathways; Cysteine and methionine metabolism; Arginine and proline metabolism; Phenylalanine metabolism; Isoquinoline alkaloid biosynthesis; Biosynthesis of antibiotics; Tropane, piperidine and pyridine alkaloid biosynthes…	GO:0009058 [Name: biosynthetic process]; GO:0006520 [Name: cellular amino acid metabolic process]	GO:0005739 [Name: mitochondrion]	GO:0030170 [Name: pyridoxal phosphate binding]; GO:0004069 [Name: L-aspartate:2-oxoglutarate aminotransferase activity]	1754.99	1.3276	0.0047	0.0007	Down				Os.11316.1.S1_at
Os.7358.1.S1_at	LOC_Os04g34100.1	Os04g0418000	4335816	LOC4335816	PF14290	Q0JDA2	expressed protein	-	osa:4335816	-	-	-	-	GO:0006099 [Name: tricarboxylic acid cycle]	GO:0005743 [Name: mitochondrial inner membrane]; GO:0045273 [Name: respiratory chain complex II]	-	1576.43	1.3842	0	0	Down			Os.6678.1.S1_at	LOC_Os02g06650.1	Os02g0162000	4328391	LOC4328391	PF02238	Q0E3P3	COX VIIa, putative, expressed	-	osa:4328391	-	-	-	-	-	GO:0016021 [Name: integral component of membrane]	-	1755.78	1.3508	0.0047	0.0007	Down				Os.9948.1.S1_at
Os.7404.1.S1_a_at	LOC_Os01g41640.1	Os01g0600300	4324595	LOC4324595	-	Q5ZAG1; Q0JLH4	expressed protein	-	osa:4324595	-	-	-	-	-	-	-	800.512	1.6509	0	0	Down			Os.7927.1.S1_at	LOC_Os10g17454.1,LOC_Os10g17454.2,LOC_Os10g17454.3	Os10g0321700,Os10g0321700,Os10g0321700	4348309	LOC4348309	PF00076	Q109W0	RNA recognition motif containing protein, expressed	-	osa:4348309	K12741	osa03040	osa03040 [Pathway Title: Spliceosome]	Spliceosome	GO:0080156 [Name: mitochondrial mRNA modification]	GO:0005739 [Name: mitochondrion]; GO:1990904 [Name: ribonucleoprotein complex]	GO:0003723 [Name: RNA binding]	1756.76	1.3554	0.0047	0.0007	Down				Os.10148.1.S1_at
Os.7469.1.S1_at	LOC_Os07g23550.1,LOC_Os07g23550.2	Os07g0418200,Os07g0418200	4343030	LOC4343030	-	Q8LHV3	expressed protein	-	osa:4343030	-	-	-	-	-	GO:0016021 [Name: integral component of membrane]	-	1531.11	0.7078	0	0	up			Os.8481.1.S2_a_at	LOC_Os03g13460.1,LOC_Os03g13460.2	Os03g0237600,Os03g0237600	4332190	LOC4332190	PF03999	Q10PE0	microtubule associated protein, putative, expressed	-	osa:4332190	K16732	-	-	-	GO:0000226 [Name: microtubule cytoskeleton organization]	-	GO:0008017 [Name: microtubule binding]	1755.32	1.2383	0.0047	0.0007	Down				Os.11193.1.S1_at
Os.7514.1.S1_at	LOC_Os07g02000.1	Os07g0110900	4342230	LOC4342230	-	Q8H5U8	expressed protein	-	osa:4342230	-	-	-	-	-	GO:0016021 [Name: integral component of membrane]	-	980.409	1.671	0	0	Down			Os.22673.1.S1_at	LOC_Os09g24954.1,LOC_Os09g24954.2,LOC_Os09g24954.3	Os09g0416500,Os09g0416500,Os09g0416500	4347062	LOC4347062	PF14709	Q0J1S4; B7F972	double-stranded RNA binding motif containing protein, expressed	-	osa:4347062	-	-	-	-	-	-	GO:0003723 [Name: RNA binding]	1749.02	0.7357	0.0046	0.0007	up				Os.14119.2.S1_x_at
Os.7527.1.S1_at	LOC_Os01g01280.1	Os01g0102300	4326466	LOC4326466	-	Q94CX1	expressed protein	-	osa:4326466	-	-	-	-	-	GO:0009543 [Name: chloroplast thylakoid lumen]	-	881.917	1.6422	0	0	Down			Os.27565.1.S1_a_at	LOC_Os05g33820.1	Os05g0408300	4338767	LOC4338767	-	A2Y4L2; Q6I575	lipase, putative, expressed	-	osa:4338767	-	-	-	-	-	-	-	1747.3	0.6746	0.0046	0.0007	up				Os.15988.1.S1_at
Os.7560.1.S1_at	LOC_Os09g19910.1	Os09g0363700	4346862	LOC4346862	PF00400	Q6K4D9	expressed protein	-	osa:4346862	-	-	-	-	-	-	-	909.738	1.5336	0	0	Down			Os.2975.1.S1_at	LOC_Os03g25400.1	Os03g0370000	4332932	LOC4332932	PF10436; PF02518	Q10KU5	kinase, putative, expressed	-	osa:4332932	K00898	-	-	-	GO:0007165 [Name: signal transduction]	-	GO:0004672 [Name: protein kinase activity]	1753.02	1.3701	0.0046	0.0007	Down				Os.18395.1.S1_s_at
Os.7645.1.S1_at	LOC_Os02g41990.1,LOC_Os02g41990.2	Os02g0631000,Os02g0631000	4330055	LOC4330055	PF10058	Q6H475	expressed protein	-	osa:4330055	-	-	-	-	GO:0071786 [Name: endoplasmic reticulum tubular network organization]	GO:0071782 [Name: endoplasmic reticulum tubular network]; GO:0016021 [Name: integral component of membrane]	-	480.961	0.4631	0	0	up			Os.39055.1.A1_s_at	LOC_Os06g51150.1,LOC_Os06g51150.2	Os06g0727200,Os06g0727200	4342124	LOC4342124	PF06628; PF00199	A6N0W2; A2YH64; B7EGE0; Q0D9C4	catalase isozyme B, putative, expressed	-	osa:4342124	K03781	osa00380; osa00630; osa01130; osa04146; osa01110; osa01200	osa01110 [Pathway Title: Biosynthesis of secondary metabolites]; osa01200 [Pathway Title: Carbon metabolism]; osa00380 [Pathway Title: Tryptophan metabolism]; osa01130 [Pathway Title: Biosynthesis of antibiotics]; osa00630 [Pathway Title: Glyoxylate and dicarboxylate metabolism]; osa04146 [Pathway Title: Peroxisome]	Biosynthesis of antibiotics; Glyoxylate and dicarboxylate metabolism; Peroxisome; Tryptophan metabolism; Carbon metabolism; Biosynthesis of secondary metabolites	GO:0006979 [Name: response to oxidative stress]; GO:0009408 [Name: response to heat]; GO:0009751 [Name: response to salicylic acid]; GO:0009414 [Name: response to water deprivation]; GO:0009646 [Name: response to absence of light]; GO:0007623 [Name: circadian rhythm]; GO:0046686 [Name: response to cadmium ion]; GO:1900034 [Name: regulation of cellular response to heat]; GO:0009737 [Name: response…	GO:0005886 [Name: plasma membrane]; GO:0009514 [Name: glyoxysome]; GO:0005777 [Name: peroxisome]	GO:0004096 [Name: catalase activity]; GO:0020037 [Name: heme binding]; GO:0046872 [Name: metal ion binding]	1748.04	0.6722	0.0046	0.0007	up				Os.21893.3.A1_at
Os.7695.1.S1_at	LOC_Os04g11390.1,LOC_Os04g11390.2	Os04g0191400,Os04g0191400	4335123	-	-	Q7XX47	expressed protein	-	osa:4335123	-	-	-	-	-	-	-	636.154	2.129	0	0	Down			Os.49573.1.S1_at	LOC_Os12g31450.1	Os12g0498400	4352263	LOC4352263	PF03776	Q5J6J5	plastid division regulator MinE, putative, expressed	-	osa:4352263	-	-	-	-	GO:0010020 [Name: chloroplast fission]; GO:0032955 [Name: regulation of barrier septum assembly]; GO:0051301 [Name: cell division]	GO:0009706 [Name: chloroplast inner membrane]	-	1748.47	0.7294	0.0046	0.0007	up				Os.25317.1.S1_at
Os.7697.1.S1_at	LOC_Os05g03934.1	Os05g0130200	9270441	LOC9270441	-	C7J2U1	expressed protein	-	osa:9270441	-	-	-	-	-	-	-	1180.2	1.5885	0	0	Down			Os.7307.2.S1_s_at	LOC_Os01g33800.1,LOC_Os01g33800.2,LOC_Os01g33840.1	Os01g0521500,Os01g0521500,None	4323951	LOC4323951	PF12572; PF00226; PF00931	B8A9A4; Q5QMD6; B8A9A3; B9EX94	heat shock protein DnaJ, putative, expressed	-	osa:4323951	-	-	-	-	-	GO:0009536 [Name: plastid]	GO:0043531 [Name: ADP binding]	1749.32	0.6691	0.0046	0.0007	up				Os.26713.1.S1_at
Os.7774.1.S1_x_at	LOC_Os07g10480.1	Os07g0204800	-	-	-	B7EY17	expressed protein	-	-	-	-	-	-	-	-	-	1285.58	1.2137	0	0	Down			Os.13714.1.S1_at	LOC_Os06g49740.1,LOC_Os06g49740.2	Os06g0711600,Os06g0711600	4342038	LOC4342038	PF08231	A6N0B8; Q5Z7Y7	pre-mRNA-splicing factor syf2, putative, expressed	-	osa:4342038	K12868	osa03040	osa03040 [Pathway Title: Spliceosome]	Spliceosome	-	GO:0000974 [Name: Prp19 complex]; GO:0071014 [Name: post-mRNA release spliceosomal complex]; GO:0071013 [Name: catalytic step 2 spliceosome]	-	1746.86	0.7024	0.0045	0.0006	up				Os.2713.1.S1_at
Os.7865.1.S1_at	LOC_Os06g15400.1	Os06g0264800	4340704	LOC4340704	PF14159	Q5Z6P4	expressed protein	-	osa:4340704	-	-	-	-	-	GO:0009535 [Name: chloroplast thylakoid membrane]; GO:0016021 [Name: integral component of membrane]	-	733.774	1.8144	0	0	Down			Os.14914.1.S1_at	LOC_Os03g04430.1,LOC_Os03g04430.2,LOC_Os03g04430.3	Os03g0137200,Os03g0137200,Os03g0137200	4331548	LOC4331548	PF00481	Q10S32	protein phosphatase 2C, putative, expressed	-	osa:4331548	-	-	-	-	-	-	GO:0046872 [Name: metal ion binding]; GO:0004724 [Name: magnesium-dependent protein serine/threonine phosphatase activity]; GO:0004722 [Name: protein serine/threonine phosphatase activity]	1751.11	1.4453	0.0045	0.0007	Down				Os.27752.1.S1_at
Os.8123.1.S1_at	LOC_Os01g56890.1,LOC_Os01g56890.2	Os01g0776700,Os01g0776700	4327895	LOC4327895	-	Q0JIU7	expressed protein	-	osa:4327895	-	-	-	-	-	GO:0016021 [Name: integral component of membrane]	-	1309.66	0.6865	0	0	up			Os.17255.1.S1_at	LOC_Os03g61790.1,LOC_Os03g61790.2	Os03g0833700,Os03g0833700	4334688	LOC4334688	PF01137; PF05189	Q75LH9	RNA 3-terminal phosphate cyclase, putative, expressed	-	osa:4334688	K11108	osa03008	osa03008 [Pathway Title: Ribosome biogenesis in eukaryotes]	Ribosome biogenesis in eukaryotes	GO:0006396 [Name: RNA processing]; GO:0042254 [Name: ribosome biogenesis]	GO:0005730 [Name: nucleolus]	GO:0004521 [Name: endoribonuclease activity]	1747.15	0.8358	0.0045	0.0007	up				Os.6156.1.S1_a_at
Os.8137.1.S1_at	LOC_Os05g40410.1	Os05g0482600	4339132	LOC4339132	-	Q0DH92	expressed protein	-	osa:4339132	-	-	-	-	-	GO:0009536 [Name: plastid]	-	1479.48	0.6971	0	0	up			Os.27534.1.A1_at	LOC_Os02g13140.1	Os02g0224400	4328771	LOC4328771	PF05195; PF00557	Q6Z8B5	xaa-Pro dipeptidase, putative, expressed	-	osa:4328771	K14213	-	-	-	-	GO:0009536 [Name: plastid]	GO:0030145 [Name: manganese ion binding]; GO:0004177 [Name: aminopeptidase activity]	1746.88	0.7162	0.0045	0.0006	up				Os.6336.1.S1_at
Os.8148.1.S1_a_at	LOC_Os04g48710.1,LOC_Os04g48710.2	Os04g0576500,Os04g0576500	4336738	LOC4336738	PF00112	Q7XUH7	expressed protein	-	osa:4336738	-	-	-	-	-	-	GO:0008234 [Name: cysteine-type peptidase activity]	835.086	1.145	0	0	Down			Os.3437.1.S1_at	LOC_Os04g52270.1,LOC_Os04g52270.2	Os04g0612600,Os04g0612600	4336967	LOC4336967	PF04733	B7E599; Q9MAX6	coatomer subunit epsilon, putative, expressed	-	osa:4336967	K17268	-	-	-	GO:0006888 [Name: ER to Golgi vesicle-mediated transport]; GO:0015031 [Name: protein transport]; GO:0006890 [Name: retrograde vesicle-mediated transport, Golgi to ER]; GO:0006891 [Name: intra-Golgi vesicle-mediated transport]	GO:0030126 [Name: COPI vesicle coat]; GO:0000139 [Name: Golgi membrane]	GO:0005198 [Name: structural molecule activity]	1751.36	1.2961	0.0045	0.0007	Down				Os.6361.1.S1_at
Os.8311.1.S1_a_at	LOC_Os06g50490.1,LOC_Os06g50490.2,LOC_Os06g50490.3,LOC_Os06g50490.4,LOC_Os06g50539.1,LOC_Os06g50539.3,LOC_Os06g50670.1,LOC_Os06g50706.1,LOC_Os06g50742.1,LOC_Os06g50818.1,LOC_Os06g50580.1	Os06g0719600,Os06g0719600,Os06g0719600,Os06g0719600,Os06g0720400,Os06g0720400,Os06g0722100,Os06g0722450,Os06g0722700,Os06g0723900,Os06g0720700	9271407; 4342091; 4342088; 9267323	LOC9271407; LOC4342091; LOC4342088; LOC9267323	PF00170; PF07762	A6MZZ4; C7J482; Q5Z4G3; Q5Z4G6; Q8SB18; Q5YM04; Q5Z8M4; C7J3P0	expressed protein	-	osa:9266154; osa:4342096; osa:9272521; osa:9271407; osa:4342088	-	-	-	-	-	-	GO:0003700 [Name: transcription factor activity, sequence-specific DNA binding]	1361.29	1.7142	0	0	Down			Os.48625.1.A1_s_at	LOC_Os05g51690.1,LOC_Os05g51690.3	Os05g0595300,Os05g0595300	4339814	LOC4339814	PF06203	Q5TKF5; Q0DFE5	CCT motif family protein, expressed	-	osa:4339814	-	-	-	-	-	GO:0005634 [Name: nucleus]	-	1745.8	0.7331	0.0045	0.0006	up				Os.6670.1.S1_at
Os.8558.1.S1_at	LOC_Os02g11770.1	Os02g0208500	9270405	LOC9270405	PF12734	B7E3W5; A3A4E0	expressed protein	-	osa:9270405	-	-	-	-	-	-	-	1436.02	1.2833	0	0	Down			Os.18612.1.S1_s_at	LOC_Os04g36050.1	Os04g0441900	4335933	LOC4335933	PF05602	Q7FA04; Q0JCZ5	cleft lip and palate transmembrane protein 1, putative, expressed	-	osa:4335933	-	-	-	-	-	GO:0016021 [Name: integral component of membrane]	-	1748.51	1.3352	0.0044	0.0007	Down				Os.11355.1.S1_at
Os.8570.4.S1_at	LOC_Os09g32330.1	Os09g0499000	4347474	LOC4347474	-	Q0J0U2	expressed protein	-	osa:4347474	-	-	-	-	-	-	-	497.064	0.3074	0	0	up			Os.20706.1.S1_at	LOC_Os04g52060.1	Os04g0610100	9270831	LOC9270831	-	C7J0W0	transposable element protein, putative, containing Pfam profile: PF03004, Transposase_24, expressed	-	osa:9270831	-	-	-	-	GO:0006355 [Name: regulation of transcription, DNA-templated]	-	-	1744.74	0.722	0.0044	0.0006	up				Os.1228.1.S1_a_at
Os.8712.1.S2_at	LOC_Os08g33320.1	Os08g0430000	4345630	LOC4345630	-	Q0J5J9	expressed protein	-	osa:4345630	-	-	-	-	-	-	-	1486.2	0.6435	0	0	up			Os.3377.1.S1_at	LOC_Os12g42090.1,LOC_Os12g42090.2,LOC_Os12g42090.3	Os12g0615400,Os12g0615400,Os12g0615400	4352791	LOC4352791	PF13649	Q40706; Q2QM69	methyltransferase domain containing protein, putative, expressed	-	osa:4352791	K12502	osa00130; osa01100; osa01110	osa01100 [Pathway Title: Metabolic pathways]; osa00130 [Pathway Title: Ubiquinone and other terpenoid-quinone biosynthesis]; osa01110 [Pathway Title: Biosynthesis of secondary metabolites]	Metabolic pathways; Ubiquinone and other terpenoid-quinone biosynthesis; Biosynthesis of secondary metabolites	GO:0010189 [Name: vitamin E biosynthetic process]	GO:0016021 [Name: integral component of membrane]; GO:0009706 [Name: chloroplast inner membrane]	GO:0102550 [Name: 2-methyl-6-geranylgeranyl-1,4-benzoquinol methyltransferase activity]	1748.53	1.3959	0.0044	0.0007	Down				Os.27076.1.S1_at
Os.8761.1.S1_s_at	LOC_Os01g73670.1,LOC_Os01g73670.2,LOC_Os01g73670.3,LOC_Os01g73670.4	Os01g0967800,Os01g0967800,Os01g0967800,Os01g0967800	4324010	LOC4324010	-	Q5JLF3; Q5JLF2; B8A9V5	expressed protein	-	osa:4324010	-	-	-	-	-	-	-	1623.67	1.45	0	0	Down			Os.38687.1.S1_at	LOC_Os02g06920.1,LOC_Os02g06920.2	Os02g0165000,Os02g0165000	4328407	LOC4328407	PF12906	Q6H6V3	zinc finger, C3HC4 type, domain containing protein, expressed	-	osa:4328407	-	-	-	-	-	GO:0016021 [Name: integral component of membrane]	GO:0008270 [Name: zinc ion binding]	1748.17	1.3973	0.0044	0.0007	Down				Os.40446.1.S1_at
Os.8824.1.S1_at	LOC_Os01g59900.1	Os01g0814400	4327599	LOC4327599	-	Q5N764	expressed protein	-	osa:4327599	-	-	-	-	-	-	-	492.052	0.4342	0	0	up			Os.4725.1.S1_at	LOC_Os01g01060.1	Os01g0100700	4326457	LOC4326457	PF00177	Q93VC6	40S ribosomal protein S5, putative, expressed	-	osa:4326457	K02989	osa03010	osa03010 [Pathway Title: Ribosome]	Ribosome	GO:0000028 [Name: ribosomal small subunit assembly]; GO:0006412 [Name: translation]	GO:0022627 [Name: cytosolic small ribosomal subunit]	GO:0003729 [Name: mRNA binding]; GO:0003735 [Name: structural constituent of ribosome]; GO:0019843 [Name: rRNA binding]	1748.74	1.2251	0.0044	0.0007	Down				Os.7348.1.S1_a_at
Os.8846.1.S1_at	LOC_Os09g22510.1	Os09g0392700	-	-	-	B7EZR6	expressed protein	-	-	-	-	-	-	-	-	-	617.183	0.462	0	0	up			Os.55409.1.S1_at	LOC_Os08g23100.1,LOC_Os08g23100.2	Os08g0319900,Os08g0319900	4345252	LOC4345252	PF04199	Q0J6H8	cyclase family protein, putative, expressed	-	osa:4345252	-	-	-	-	GO:0019441 [Name: tryptophan catabolic process to kynurenine]	GO:0005576 [Name: extracellular region]	GO:0004061 [Name: arylformamidase activity]	1748.59	1.4522	0.0044	0.0007	Down				Os.8443.1.S1_at
Os.8850.1.S1_x_at	LOC_Os09g04160.1,LOC_Os09g04160.2	Os09g0128400,Os09g0128400	4346441	LOC4346441	-	Q0J3D8	expressed protein	-	osa:4346441	-	-	-	-	-	-	-	1411.38	0.8248	0	0	Down			Os.7556.1.S1_x_at	LOC_Os01g49770.1,LOC_Os01g49770.2	Os01g0692700,Os01g0692700	9269271	LOC9269271	PF13639	C7IWC7; B7EB47	zinc finger, C3HC4 type domain containing protein, expressed	-	osa:9269271	-	-	-	-	-	-	-	1748.29	1.2584	0.0044	0.0007	Down				Os.9709.2.S1_at
Os.9036.1.S1_at	LOC_Os03g51640.1	Os03g0726400	4333969	LOC4333969	-	Q75GI7	expressed protein	-	osa:4333969	-	-	-	-	-	GO:0016021 [Name: integral component of membrane]	-	1159.5	1.5951	0	0	Down			Os.10429.1.S1_at	LOC_Os08g03650.1	Os08g0130600	4344591	LOC4344591	PF03000; PF00651	A6MZG0; Q7EZR6	BTBN17 - Bric-a-Brac, Tramtrack, Broad Complex BTB domain with non-phototropic hypocotyl 3 NPH3 and coiled-coil domains, expressed	-	osa:4344591	-	-	-	-	-	-	-	1746.37	1.4245	0.0043	0.0007	Down				OsAffx.25285.1.S1_at
Os.9343.1.S1_a_at	LOC_Os06g28524.1	Os06g0479200	4341046	LOC4341046	-	Q0DC63	expressed protein	-	osa:4341046	-	-	-	-	-	-	-	1041	0.5776	0	0	up			Os.197.1.S1_a_at	LOC_Os01g15310.1	Os01g0256900	4326227	LOC4326227	PF01423	Q1EHT6; Q9LGE6	LSM domain containing protein, expressed	-	osa:4326227	K12623	osa03040; osa03018	osa03040 [Pathway Title: Spliceosome]; osa03018 [Pathway Title: RNA degradation]	RNA degradation; Spliceosome	GO:0000956 [Name: nuclear-transcribed mRNA catabolic process]; GO:0033962 [Name: cytoplasmic mRNA processing body assembly]; GO:0000387 [Name: spliceosomal snRNP assembly]	GO:0000932 [Name: P-body]; GO:0005681 [Name: spliceosomal complex]; GO:0005688 [Name: U6 snRNP]	GO:0003723 [Name: RNA binding]; GO:0017070 [Name: U6 snRNA binding]	1741.93	0.6319	0.0043	0.0006	up				Os.14083.1.S1_at
Os.9407.1.S1_at	LOC_Os04g49610.1,LOC_Os04g49610.2	Os04g0585600,Os04g0585600	4336792	LOC4336792	-	Q7XP56	expressed protein	-	osa:4336792	-	-	-	-	-	GO:0016021 [Name: integral component of membrane]	-	1139.52	1.6355	0	0	Down			Os.34757.1.S1_at	LOC_Os01g60280.1,LOC_Os01g60280.1	Os01g0818600,Os01g0818700	-	-	PF08263; PF07714	-	ATP binding protein, putative, expressed	-	-	-	-	-	-	-	-	-	1746.23	1.3639	0.0043	0.0007	Down				Os.18747.1.S1_at
Os.9413.1.S1_at	LOC_Os03g12560.1	Os03g0226700	4332127	LOC4332127	-	Q8H855	expressed protein	-	osa:4332127	-	-	-	-	-	GO:0009507 [Name: chloroplast]	-	818.664	1.8209	0	0	Down			Os.47410.1.S1_at	LOC_Os07g39280.1	Os07g0581000	4343722	LOC4343722	PF03151	Q69V70	transporter-related, putative, expressed	-	osa:4343722	-	-	-	-	-	GO:0005794 [Name: Golgi apparatus]; GO:0016021 [Name: integral component of membrane]	GO:0015297 [Name: antiporter activity]; GO:0005459 [Name: UDP-galactose transmembrane transporter activity]; GO:0022857 [Name: transmembrane transporter activity]; GO:0005338 [Name: nucleotide-sugar transmembrane transporter activity]	1741.9	0.6599	0.0043	0.0006	up				Os.7862.1.S1_at
Os.9774.1.S1_at	LOC_Os11g32160.1	Os11g0524300	4350611	LOC4350611	PF06206	Q2R3F0	expressed protein	-	osa:4350611	-	-	-	-	GO:0098586 [Name: cellular response to virus]; GO:0010020 [Name: chloroplast fission]; GO:0017009 [Name: protein-phycocyanobilin linkage]; GO:0046741 [Name: transport of virus in host, tissue to tissue]; GO:0051302 [Name: regulation of cell division]; GO:0000302 [Name: response to reactive oxygen species]	GO:0016021 [Name: integral component of membrane]; GO:0009707 [Name: chloroplast outer membrane]	GO:0016829 [Name: lyase activity]	1347.04	0.7376	0	0	up			Os.9748.1.S1_at	LOC_Os08g04440.1,LOC_Os08g04440.2	Os08g0139000,Os08g0139000	4344631	LOC4344631	PF00076	B7EIA1; Q6ZKI2	RNA recognition motif containing protein, putative, expressed	-	osa:4344631	-	-	-	-	-	GO:1990904 [Name: ribonucleoprotein complex]	GO:0003723 [Name: RNA binding]	1742.34	0.722	0.0043	0.0006	up				Os.11963.1.S2_at
Os.9814.1.S1_at	LOC_Os01g55570.1,LOC_Os01g55570.2,LOC_Os01g55570.3,LOC_Os01g55570.4	Os01g0761000,Os01g0761000,Os01g0761000,Os01g0761000	4327018	LOC4327018	PF14159	Q94DS3	expressed protein	-	osa:4327018	-	-	-	-	-	GO:0009535 [Name: chloroplast thylakoid membrane]; GO:0016021 [Name: integral component of membrane]	-	923.101	1.4668	0	0	Down			Os.17886.1.S1_at	LOC_Os07g37740.1	Os07g0564600	4343617	LOC4343617	PF04144	Q8H5X5; B7E5U7	secretory carrier-associated membrane protein, putative, expressed	-	osa:4343617	-	-	-	-	GO:0006898 [Name: receptor-mediated endocytosis]; GO:0006897 [Name: endocytosis]; GO:0015031 [Name: protein transport]	GO:0005769 [Name: early endosome]; GO:0030658 [Name: transport vesicle membrane]; GO:0055038 [Name: recycling endosome membrane]; GO:0005886 [Name: plasma membrane]; GO:0000139 [Name: Golgi membrane]; GO:0032588 [Name: trans-Golgi network membrane]; GO:0005794 [Name: Golgi apparatus]; GO:0016021 [Name: integral component of membrane]	-	1744.49	1.2694	0.0042	0.0006	Down				Os.1228.2.S1_x_at
Os.9818.1.S1_at	LOC_Os02g52260.1	Os02g0759900	4330797	LOC4330797	PF14159	Q6K8D8	expressed protein	-	osa:4330797	-	-	-	-	-	GO:0009535 [Name: chloroplast thylakoid membrane]; GO:0016021 [Name: integral component of membrane]	-	578.004	1.5758	0	0	Down			Os.27768.1.S1_at	LOC_Os08g04620.1	Os08g0141300	4344640	LOC4344640	PF00635	Q6YZ10	MSP domain containing protein, putative, expressed	-	osa:4344640	-	-	-	-	GO:0009739 [Name: response to gibberellin]	GO:0005789 [Name: endoplasmic reticulum membrane]	-	1745.03	1.4293	0.0042	0.0006	Down				Os.12410.3.S1_s_at
Os.9846.1.S1_x_at	LOC_Os11g01890.1,LOC_Os11g01890.2,LOC_Os12g01950.1	Os11g0110100,Os11g0110100,Os12g0110400	4349577	LOC4349577	-	Q0IV61	expressed protein	-	osa:4349577	-	-	-	-	GO:0042793 [Name: transcription from plastid promoter]; GO:0045893 [Name: positive regulation of transcription, DNA-templated]	GO:0009508 [Name: plastid chromosome]; GO:0009507 [Name: chloroplast]	-	451.352	1.7973	0	0	Down			Os.4673.1.S1_a_at	LOC_Os07g01930.1	Os07g0110300	4342226	LOC4342226	PF00111	B8B6V2; Q7XIU1; Q7XIU2	2Fe-2S iron-sulfur cluster binding domain containing protein, expressed	-	osa:4342226	-	-	-	-	-	GO:0005739 [Name: mitochondrion]	GO:0009055 [Name: electron carrier activity]; GO:0051537 [Name: 2 iron, 2 sulfur cluster binding]	1740.4	0.7183	0.0042	0.0006	up				Os.12784.1.S1_at
Os.9885.2.S1_at	LOC_Os03g61090.1	Os03g0826200	4334638	LOC4334638	PF11493	Q94GE8; Q10BA0	expressed protein	-	osa:4334638	-	-	-	-	-	GO:0009536 [Name: plastid]	-	989.166	0.6907	0	0	up			Os.5129.2.S1_a_at	LOC_Os02g07680.1,LOC_Os02g07680.2,LOC_Os02g07680.3,LOC_Os02g07680.4,LOC_Os02g07680.5	Os02g0173100,Os02g0173100,Os02g0173100,Os02g0173100,Os02g0173100	4328451	LOC4328451	PF00067	Q0E3I8; B7ECI4	cytochrome P450, putative, expressed	-	osa:4328451	-	-	-	-	-	-	GO:0020037 [Name: heme binding]; GO:0016705 [Name: oxidoreductase activity, acting on paired donors, with incorporation or reduction of molecular oxygen]; GO:0005506 [Name: iron ion binding]; GO:0004497 [Name: monooxygenase activity]	1743.65	1.2322	0.0042	0.0006	Down				Os.14978.1.S1_a_at
OsAffx.11507.1.S1_at	LOC_Os01g47570.1	Os01g0665900	-	-	-	-	expressed protein	-	-	-	-	-	-	-	-	-	1374.75	0.6138	0	0	up			Os.2328.1.S1_at	LOC_Os01g65230.1	Os01g0872800	4324953	LOC4324953	PF14593; PF00069	Q9XF68; Q8RUE8	AGC_AGC_other_PDK1_Pk61C.1 - ACG kinases include homologs to PKA, PKG and PKC, expressed	-	osa:4324953	K06276	osa04931	osa04931 [Pathway Title: Insulin resistance]	Insulin resistance	GO:0035556 [Name: intracellular signal transduction]; GO:0018105 [Name: peptidyl-serine phosphorylation]	-	GO:0004674 [Name: protein serine/threonine kinase activity]; GO:0005524 [Name: ATP binding]	1740.99	1.4036	0.0041	0.0006	Down				Os.15790.1.S1_at
OsAffx.17026.1.S1_at	LOC_Os08g16570.1,LOC_Os08g16570.3	Os08g0266300,Os08g0266300	4345120	LOC4345120	-	Q0J6U8; B9FZZ5; B8B8Z2	expressed protein	-	osa:4345120	-	-	-	-	-	-	-	962.71	1.5386	0	0	Down			Os.4894.2.S1_a_at	LOC_Os05g36910.1,LOC_Os05g36910.2	Os05g0440100,Os05g0440100	9270028; 4338920	LOC9270028; LOC4338920	PF04970; PF00850	B7ETM3; Q60DG7; Q60DG8	NC domain-containing protein, putative, expressed	-	osa:4338920	-	-	-	-	GO:0071284 [Name: cellular response to lead ion]	GO:0005634 [Name: nucleus]	GO:0032041 [Name: NAD-dependent histone deacetylase activity (H3-K14 specific)]	1737.77	0.6535	0.0041	0.0006	up				Os.15908.1.S1_s_at
OsAffx.21203.1.S1_at	LOC_Os01g38660.1	Os01g0567400	4326341	LOC4326341	PF12023	Q0JLU6	expressed protein	-	osa:4326341	-	-	-	-	-	-	-	1517.76	0.7232	0	0	up			Os.5915.1.S1_at	LOC_Os11g03530.1,LOC_Os11g03530.2,LOC_Os11g03530.3,LOC_Os12g03270.1	Os11g0129600,Os11g0129600,Os11g0129600,Os12g0126200	4351385; 4349666	LOC4351385; LOC4349666	PF04727	Q2QYA8; Q0IUX5	ELMO/CED-12 family protein, putative, expressed	-	osa:4351385	-	-	-	-	-	-	-	1741.47	1.2072	0.0041	0.0006	Down				Os.17255.1.S1_at
OsAffx.24189.1.S1_at	LOC_Os02g10730.1	Os02g0201300	4328649	LOC4328649	PF07491	Q0E300	expressed protein	-	osa:4328649	-	-	-	-	-	GO:0016021 [Name: integral component of membrane]	GO:0004865 [Name: protein serine/threonine phosphatase inhibitor activity]	573.695	0.7194	0	0	up			OsAffx.32331.1.S1_x_at	LOC_Os01g57946.1,LOC_Os04g16842.1,LOC_Os06g39700.1,LOC_Os08g15288.1,LOC_Os10g21328.1,LOC_Os09g07910.1	None,None,None,None,None,None	-	-	PF01000; PF03118; PF01193; PF00411	-	DNA-directed RNA polymerase subunit alpha, putative, expressed	-	-	-	-	-	-	-	-	-	1741.41	1.1026	0.0041	0.0006	Down				Os.18776.1.S1_at
OsAffx.24369.11.S1_s_at	LOC_Os03g06480.1	Os03g0160900	4331700	LOC4331700	-	Q0DUY5	expressed protein	-	osa:4331700	-	-	-	-	-	-	-	1379.29	1.6464	0	0	Down			Os.10956.1.S1_at	LOC_Os01g62370.1,LOC_Os01g62370.2	Os01g0841000,Os01g0841000	4327394	LOC4327394	PF01417	Q5N9U6	ENTH domain containing protein, expressed	-	osa:4327394	-	-	-	-	-	-	-	1736.55	0.8017	0.004	0.0006	up				Os.19954.1.S1_at
OsAffx.27605.1.S1_s_at	LOC_Os06g13190.1	Os06g0239200	4340617	LOC4340617	-	Q67VB0	expressed protein	-	osa:4340617	-	-	-	-	-	-	-	407.361	0.3468	0	0	up			Os.35152.1.S1_at	LOC_Os05g38730.1,LOC_Os05g38730.2	Os05g0462600,Os05g0462600	-	-	PF03399	-	SAC3/GANP family protein, putative, expressed	-	-	-	-	-	-	-	-	-	1735.69	0.7073	0.004	0.0006	up				Os.20937.1.S1_at
OsAffx.29152.1.S1_s_at	LOC_Os08g11450.1,LOC_Os08g11450.2	Os08g0214900,Os08g0214900	9268072	-	-	C7J5N6	expressed protein	-	osa:9268072	-	-	-	-	-	-	-	1486.32	1.5063	0	0	Down			Os.39182.1.A1_s_at	LOC_Os09g20830.3,LOC_Os09g20830.4	Os09g0375100,Os09g0375100	-	-	PF01535; PF13041	B7EBU9	heat shock factor-binding protein 1, putative, expressed	-	-	-	-	-	-	-	GO:0016021 [Name: integral component of membrane]	-	1739.76	1.3934	0.004	0.0006	Down				Os.2219.1.S1_at
OsAffx.31586.1.S1_s_at	LOC_Os12g05000.1	Os12g0144000	4351484	LOC4351484	PF13902	Q0IQ56	expressed protein	-	osa:4351484	-	-	-	-	-	-	-	1426.16	1.5657	0	0	Down			Os.49153.1.A1_x_at	LOC_Os10g39440.1,LOC_Os10g39440.2	Os10g0539900,Os10g0539900	4349251	LOC4349251	PF00083	Q336W8	transporter family protein, putative, expressed	-	osa:4349251	-	-	-	-	GO:0008643 [Name: carbohydrate transport]	GO:0005887 [Name: integral component of plasma membrane]	GO:0005366 [Name: myo-inositol:proton symporter activity]	1739.02	1.4495	0.004	0.0006	Down				Os.23413.1.A1_at
OsAffx.32219.1.S1_x_at	LOC_Os04g16726.1,LOC_Os10g21388.1	None,None	-	-	-	-	expressed protein	-	-	-	-	-	-	-	-	-	482.173	0.318	0	0	up			Os.11316.1.S1_at	LOC_Os01g68020.1	Os01g0908200	4324985	LOC4324985	PF00651; PF02135	Q8L3R7	BTBZ2 - Bric-a-Brac, Tramtrack, and Broad Complex BTB domain with TAZ zinc finger and Calmodulin-binding domains, expressed	-	osa:4324985	-	-	-	-	GO:0006355 [Name: regulation of transcription, DNA-templated]	GO:0005634 [Name: nucleus]	GO:0004402 [Name: histone acetyltransferase activity]; GO:0008270 [Name: zinc ion binding]; GO:0003712 [Name: transcription cofactor activity]	1736.78	1.3193	0.0039	0.0006	Down				Os.26688.1.S2_s_at
OsAffx.3275.1.S1_at	LOC_Os03g19400.1	Os03g0307000	4332605	LOC4332605	-	B8AMG8; Q10MJ2	expressed protein	-	osa:4332605	-	-	-	-	-	GO:0031410 [Name: cytoplasmic vesicle]	-	812.402	0.6051	0	0	up			Os.11467.1.S1_at	LOC_Os02g13840.1	Os02g0232400	4328812	LOC4328812	PF00285	Q0E2K1; Q6EUF8; A1YZC9	citrate synthase, putative, expressed	-	osa:4328812	K01647	osa01230; osa01100; osa01130; osa01200; osa00020; osa01210; osa00630; osa01110	osa01200 [Pathway Title: Carbon metabolism]; osa00020 [Pathway Title: Citrate cycle (TCA cycle)]; osa00630 [Pathway Title: Glyoxylate and dicarboxylate metabolism]; osa01110 [Pathway Title: Biosynthesis of secondary metabolites]; osa01210 [Pathway Title: 2-Oxocarboxylic acid metabolism]; osa01130 [Pathway Title: Biosynthesis of antibiotics]; osa01230 [Pathway Title: Biosynthesis of amino acids]; …	Biosynthesis of amino acids; Citrate cycle (TCA cycle); Carbon metabolism; Biosynthesis of secondary metabolites; Glyoxylate and dicarboxylate metabolism; Metabolic pathways; Biosynthesis of antibiotics; 2-Oxocarboxylic acid metabolism	GO:0006099 [Name: tricarboxylic acid cycle]; GO:0005975 [Name: carbohydrate metabolic process]	GO:0005759 [Name: mitochondrial matrix]	GO:0046912 [Name: transferase activity, transferring acyl groups, acyl groups converted into alkyl on transfer]; GO:0004108 [Name: citrate (Si)-synthase activity]	1733.29	0.6579	0.0039	0.0005	up				Os.4671.1.S1_a_at
OsAffx.3635.1.S1_s_at	LOC_Os03g57750.1,LOC_Os03g57750.2	Os03g0791432,Os03g0791432	9267929	LOC9267929	-	Q852J2	expressed protein	-	osa:9267929	-	-	-	-	-	-	-	851.813	0.5336	0	0	up			Os.37668.1.S1_at	LOC_Os01g43844.1	Os01g0628700	4326663	LOC4326663	PF00067	A6MZW2; B7F9W3; Q0JL27	cytochrome P450 72A1, putative, expressed	-	osa:4326663	-	-	-	-	-	-	GO:0005506 [Name: iron ion binding]; GO:0016705 [Name: oxidoreductase activity, acting on paired donors, with incorporation or reduction of molecular oxygen]; GO:0020037 [Name: heme binding]; GO:0004497 [Name: monooxygenase activity]	1732.49	0.7417	0.0039	0.0005	up				Os.6846.1.S1_at
OsAffx.4145.1.S1_x_at	LOC_Os04g51290.1,LOC_Os04g51290.1,LOC_Os04g51260.1,LOC_Os04g51280.1	Os04g0601900,Os04g0602000,Os04g0601600,Os04g0601800	4336885	-	-	Q0JAF5	expressed protein	-	osa:4336885	-	-	-	-	GO:0016554 [Name: cytidine to uridine editing]	-	-	1186.44	1.3867	0	0	Down			Os.9132.1.A1_at	LOC_Os03g04520.2,LOC_Os03g04520.4	Os03g0138100,Os03g0138100	4331556	LOC4331556	PF00076	Q0DVB7	RNA recognition motif containing protein, putative, expressed	-	osa:4331556	K12837	osa03040	osa03040 [Pathway Title: Spliceosome]	Spliceosome	-	-	GO:0003676 [Name: nucleic acid binding]	1733.17	0.7518	0.0039	0.0005	up				Os.7445.1.S1_at
OsAffx.6135.1.S1_s_at	LOC_Os08g44470.1	Os08g0559000	4346313	LOC4346313	-	Q6YZI4	expressed protein	-	osa:4346313	-	-	-	-	-	GO:0016021 [Name: integral component of membrane]; GO:0005747 [Name: mitochondrial respiratory chain complex I]	-	818.716	0.5317	0	0	up			Os.9753.1.S1_at	LOC_Os07g03240.1	Os07g0124600	4342307	LOC4342307	PF00076	Q84Z04	RNA recognition motif containing protein, putative, expressed	-	osa:4342307	K14411	osa03015	osa03015 [Pathway Title: mRNA surveillance pathway]	mRNA surveillance pathway	-	GO:1990904 [Name: ribonucleoprotein complex]; GO:0019013 [Name: viral nucleocapsid]	GO:0003723 [Name: RNA binding]; GO:0003729 [Name: mRNA binding]; GO:0003727 [Name: single-stranded RNA binding]	1733.75	0.6248	0.0039	0.0006	up				Os.9172.2.S1_x_at
OsAffx.7038.1.S1_s_at	LOC_Os11g07580.1	Os11g0177200	9268590	LOC9268590	-	Q53PI7	expressed protein	-	osa:9268590	-	-	-	-	-	-	-	1071.48	1.7084	0	0	Down			OsAffx.22431.1.S1_s_at	LOC_Os07g12510.1	Os07g0227600	4342759	LOC4342759	PF00847	Q0D7P2	AP2 domain containing protein, expressed	ERF	osa:4342759	-	-	-	-	-	GO:0005634 [Name: nucleus]	GO:0003700 [Name: transcription factor activity, sequence-specific DNA binding]; GO:0003677 [Name: DNA binding]	1733.48	0.679	0.0039	0.0005	up				OsAffx.24953.1.S1_s_at
OsAffx.7060.1.S1_s_at	LOC_Os11g10320.1	Os11g0209000	4350044	LOC4350044	PF07172	Q0ITX7; Q2R914	expressed protein	-	osa:4350044	-	-	-	-	-	GO:0016021 [Name: integral component of membrane]	-	409.345	1.8949	0	0	Down			Os.10889.1.S1_at	LOC_Os02g21880.1,LOC_Os02g21880.2	Os02g0324300,Os02g0324300	4329178	LOC4329178	PF04502	Q6Z6T3	coiled-coil domain-containing protein, putative, expressed	-	osa:4329178	K13115	-	-	-	-	-	-	1730.83	0.6798	0.0038	0.0005	up				OsAffx.26764.1.S1_x_at
Os.11883.1.S1_at	LOC_Os05g41480.2	Os05g0494500	4339191	LOC4339191	PF03151	Q65X78	domain of unknown function, DUF250 domain containing protein, expressed	-	osa:4339191	-	-	-	-	-	GO:0005802 [Name: trans-Golgi network]; GO:0016021 [Name: integral component of membrane]; GO:0005768 [Name: endosome]; GO:0005794 [Name: Golgi apparatus]	GO:0015297 [Name: antiporter activity]; GO:0022857 [Name: transmembrane transporter activity]	1856.42	0.804	0.0018	0.0004	up			Os.12611.1.S1_at	LOC_Os04g36760.1	Os04g0445200	4335957	LOC4335957	PF05899	Q0JCX3	enzyme of the cupin superfamily protein, putative, expressed	-	osa:4335957	-	-	-	-	-	GO:0009536 [Name: plastid]	-	1736.07	1.3499	0.0038	0.0006	Down				OsAffx.27815.1.S1_s_at
Os.24711.1.A1_at	LOC_Os11g38020.1	Os11g0592700	4350828	LOC4350828	PF16360	Q0IRV7	GTPase of unknown function domain containing protein, putative, expressed	-	osa:4350828	K03665	-	-	-	-	GO:0009536 [Name: plastid]	GO:0005525 [Name: GTP binding]	1637.58	1.2973	0.0001	0	Down			Os.13475.1.S1_at	LOC_Os02g45650.1	Os02g0680400	4330318	LOC4330318	PF01435; PF16491	Q6EPN8; B9F1T6	peptidase, putative, expressed	-	osa:4330318	K06013	osa01130; osa00900	osa00900 [Pathway Title: Terpenoid backbone biosynthesis]; osa01130 [Pathway Title: Biosynthesis of antibiotics]	Terpenoid backbone biosynthesis; Biosynthesis of antibiotics	GO:0071586 [Name: CAAX-box protein processing]	GO:0005773 [Name: vacuole]; GO:0030176 [Name: integral component of endoplasmic reticulum membrane]	GO:0004222 [Name: metalloendopeptidase activity]; GO:0046872 [Name: metal ion binding]	1735.97	1.3516	0.0038	0.0006	Down				Os.49042.1.A1_s_at
Os.10470.1.S1_s_at	LOC_Os05g35540.1	Os05g0430400	4338877	LOC4338877	PF01926	Q5TKI5	GTPase of unknown function domain containing protein, putative, expressed	-	osa:4338877	-	-	-	-	-	GO:0005739 [Name: mitochondrion]	GO:0005525 [Name: GTP binding]; GO:0003924 [Name: GTPase activity]	932.329	1.6755	0	0	Down			Os.14811.1.S1_at	LOC_Os04g46892.1	Os04g0555500	4336620	-	PF00400	Q0JB56	WD domain, G-beta repeat domain containing protein, expressed	-	osa:4336620	-	-	-	-	-	-	-	1734.32	1.3512	0.0038	0.0006	Down				Os.8019.1.S1_at
Os.13708.1.S1_at	LOC_Os03g14250.1	Os03g0246500	4332240	LOC4332240	PF05911	Q10P54	plant protein of unknown function DUF869 domain containing protein, expressed	-	osa:4332240	-	-	-	-	-	-	-	668.519	0.6606	0	0	up			Os.52901.1.S1_at	LOC_Os05g45040.1	Os05g0526300	9266102	LOC9266102	PF12937	C7J2K6; Q65X90	OsFBX170 - F-box domain containing protein, expressed	-	osa:9266102	-	-	-	-	-	GO:0005739 [Name: mitochondrion]	-	1731.9	0.6399	0.0038	0.0005	up				Os.40020.1.S1_a_at
Os.6721.1.S1_x_at	LOC_Os06g40040.1,LOC_Os06g40040.2,LOC_Os02g10810.1	Os06g0602600,Os06g0602600,Os02g0202500	4341459	LOC4341459	PF01918	Q69XJ9	protein of unknown function domain containing protein, expressed	-	osa:4341459	-	-	-	-	-	-	GO:0003676 [Name: nucleic acid binding]	661.994	1.8229	0	0	Down			Os.10561.1.S1_at	LOC_Os07g10830.1	Os07g0209000	4342702	LOC4342702	PF03345	A6N006; Q6ZLK0	dolichyl-diphosphooligosaccharide--protein glycosyltransferase 48 kDasubunit precursor, putative, expressed	-	osa:4342702	K12670	osa00510; osa01100; osa04141	osa00510 [Pathway Title: N-Glycan biosynthesis]; osa01100 [Pathway Title: Metabolic pathways]; osa04141 [Pathway Title: Protein processing in endoplasmic reticulum]	N-Glycan biosynthesis; Protein processing in endoplasmic reticulum; Metabolic pathways	GO:0009664 [Name: plant-type cell wall organization]; GO:0018279 [Name: protein N-linked glycosylation via asparagine]; GO:0009826 [Name: unidimensional cell growth]	GO:0016021 [Name: integral component of membrane]; GO:0009505 [Name: plant-type cell wall]; GO:0008250 [Name: oligosaccharyltransferase complex]; GO:0005730 [Name: nucleolus]; GO:0005774 [Name: vacuolar membrane]; GO:0009506 [Name: plasmodesma]; GO:0005783 [Name: endoplasmic reticulum]; GO:0005794 [Name: Golgi apparatus]	GO:0016740 [Name: transferase activity]	1732.1	1.3558	0.0037	0.0005	Down				Os.11657.1.S1_at
Os.9706.1.S1_at	LOC_Os03g61210.1	Os03g0827600	4334648	LOC4334648	PF03619	Q0DM52; Q10B77	domain of unknown function domain containing protein, expressed	-	osa:4334648	-	-	-	-	-	GO:0016021 [Name: integral component of membrane]	GO:0016301 [Name: kinase activity]	1396.47	0.7254	0	0	up			Os.11793.1.S1_at	LOC_Os06g43210.1	Os06g0639100	4341618	LOC4341618	PF12906	B9FQ39; Q67WE0; Q0DAQ2	zinc finger, C3HC4 type domain containing protein, expressed	-	osa:4341618	K10661	osa04141	osa04141 [Pathway Title: Protein processing in endoplasmic reticulum]	Protein processing in endoplasmic reticulum	GO:0008299 [Name: isoprenoid biosynthetic process]; GO:0010345 [Name: suberin biosynthetic process]; GO:0042335 [Name: cuticle development]; GO:0030433 [Name: ubiquitin-dependent ERAD pathway]; GO:0009414 [Name: response to water deprivation]; GO:0010143 [Name: cutin biosynthetic process]; GO:0010025 [Name: wax biosynthetic process]; GO:1900490 [Name: positive regulation of hydroxymethylglutaryl-…	GO:0030176 [Name: integral component of endoplasmic reticulum membrane]; GO:0016021 [Name: integral component of membrane]	GO:0008270 [Name: zinc ion binding]	1728.1	0.6699	0.0037	0.0005	up				Os.11885.1.S1_at
Os.8201.1.S1_at	LOC_Os12g01380.1,LOC_Os11g01370.1	Os12g0104700,Os11g0104800	4351254	LOC4351254	PF14416; PF13839	Q2QYW3	proteins of unknown function domain containing protein, expressed	-	osa:4351254	-	-	-	-	-	GO:0005794 [Name: Golgi apparatus]	GO:0016413 [Name: O-acetyltransferase activity]	1687.74	0.8212	0.0002	0	up			Os.12959.1.S1_at	LOC_Os05g46780.1	Os05g0545600	4339499	LOC4339499	PF00498	Q6L5A9; Q0DG95	transposon protein, putative, CACTA, En/Spm sub-class, expressed	-	osa:4339498	K13108	-	-	-	-	-	-	1728.31	0.7239	0.0037	0.0005	up				Os.22831.1.S1_at
Os.8201.1.S1_x_at	LOC_Os12g01380.1,LOC_Os11g01370.1	Os12g0104700,Os11g0104800	4351254	LOC4351254	PF14416; PF13839	Q2QYW3	proteins of unknown function domain containing protein, expressed	-	osa:4351254	-	-	-	-	-	GO:0005794 [Name: Golgi apparatus]	GO:0016413 [Name: O-acetyltransferase activity]	1277.99	0.779	0	0	up			Os.16878.1.S1_at	LOC_Os07g27150.1,LOC_Os07g27150.2,LOC_Os07g27150.3,LOC_Os06g05804.2,LOC_Os06g05804.1,LOC_Os06g05804.3,LOC_Os06g05804.4	Os07g0454700,Os07g0454700,Os07g0454700,Os06g0151300,Os06g0151300,Os06g0151300,Os06g0151300	4343141	LOC4343141	PF04099	Q84NS9	trafficking protein particle complex subunit 4, putative, expressed	-	osa:4343141	-	-	-	-	GO:0006888 [Name: ER to Golgi vesicle-mediated transport]	GO:0030008 [Name: TRAPP complex]; GO:0005737 [Name: cytoplasm]	GO:0017112 [Name: Rab guanyl-nucleotide exchange factor activity]	1732.48	1.4274	0.0037	0.0006	Down				Os.7513.1.S1_at
Os.18087.1.S1_at	LOC_Os03g30570.1,LOC_Os03g30570.2	Os03g0419100,Os03g0419100	4333126	LOC4333126	PF16136; PF07897; PF16135	A3AJ60; Q10JI3; A2XI24	protein of unknown function DUF1675 domain containing protein, expressed	-	osa:4333126	-	-	-	-	GO:0007165 [Name: signal transduction]; GO:0045892 [Name: negative regulation of transcription, DNA-templated]	GO:0005634 [Name: nucleus]	-	1974.87	0.9191	0.0069	0.0015	up			Os.22300.1.S1_at	LOC_Os03g20670.1	Os03g0322800	4332687	LOC4332687	PF04727	Q10M53	ELMO/CED-12 family protein, putative, expressed	-	osa:4332687	-	-	-	-	-	-	-	1729.1	0.6832	0.0037	0.0005	up				Os.10122.1.S1_at
Os.21824.1.S1_at	LOC_Os01g55050.1,LOC_Os01g55050.2	Os01g0754500,Os01g0754500	4325133	LOC4325133	PF07223	Q5JML5	protein of unknown function DUF1421 domain containing protein, expressed	-	osa:4325133	-	-	-	-	-	-	-	1955.5	1.2332	0.0049	0.0011	Down			Os.26828.1.A1_at	LOC_Os11g26130.1	Os11g0448000	4350438	LOC4350438	PF08263; PF00069; PF13855	Q53KI1	receptor protein kinase TMK1 precursor, putative, expressed	-	osa:4350438	-	-	-	-	-	GO:0016021 [Name: integral component of membrane]	GO:0005524 [Name: ATP binding]; GO:0004674 [Name: protein serine/threonine kinase activity]	1727.95	0.6637	0.0037	0.0005	up				Os.11493.1.A1_at
Os.5747.1.S1_at	LOC_Os05g45280.1	Os05g0529000	4339401	LOC4339401	PF04367	Q65XC4	protein of unknown function DUF502 domain containing protein, expressed	-	osa:4339401	-	-	-	-	-	GO:0005794 [Name: Golgi apparatus]; GO:0016021 [Name: integral component of membrane]	-	1897.08	0.8246	0.0029	0.0006	up			Os.5642.1.S1_at	LOC_Os03g58620.1	Os03g0800500	4334451	LOC4334451	PF06695	A3ANP8; B8ALD0; Q851R4	small multi-drug export protein, putative, expressed	-	osa:4334451	-	-	-	-	-	GO:0016021 [Name: integral component of membrane]; GO:0009507 [Name: chloroplast]	-	1732.25	1.3966	0.0037	0.0005	Down				Os.11645.1.S1_at
Os.26043.1.S1_at	LOC_Os03g22890.1,LOC_Os03g22890.2	Os03g0352400,Os03g0352400	4332852	LOC4332852	PF08153; PF01926	Q10LF7	GTPase of unknown function domain containing protein, putative, expressed	-	osa:4332852	K14537	osa03008	osa03008 [Pathway Title: Ribosome biogenesis in eukaryotes]	Ribosome biogenesis in eukaryotes	-	GO:0005730 [Name: nucleolus]	GO:0016787 [Name: hydrolase activity]; GO:0005525 [Name: GTP binding]	1847.26	0.744	0.0016	0.0003	up			OsAffx.26387.1.S1_at	LOC_Os04g39210.1	Os04g0466600	9272649	LOC9272649	PF04371	B7FA89; C7J0V4	agmatine deiminase, putative, expressed	-	osa:9272649	-	-	-	-	GO:0009446 [Name: putrescine biosynthetic process]	-	GO:0004668 [Name: protein-arginine deiminase activity]; GO:0047632 [Name: agmatine deiminase activity]	1727.79	0.6746	0.0037	0.0005	up				Os.12561.1.S1_at
Os.18863.1.S1_at	LOC_Os01g53150.2	Os01g0732200	4324152	LOC4324152	PF01926	Q5JM78	GTPase of unknown function domain containing protein, putative, expressed	-	osa:4324152	K03978	-	-	-	-	-	GO:0005525 [Name: GTP binding]	1486.96	1.2959	0	0	Down			Os.1605.1.S1_at	LOC_Os04g37619.1	Os04g0448900	4335984	LOC4335984	PF01494; PF00498	Q0JCU7	zeaxanthin epoxidase, chloroplast precursor, putative, expressed	-	osa:4335984	K09838	osa00906; osa01110; osa01100	osa01110 [Pathway Title: Biosynthesis of secondary metabolites]; osa00906 [Pathway Title: Carotenoid biosynthesis]; osa01100 [Pathway Title: Metabolic pathways]	Carotenoid biosynthesis; Metabolic pathways; Biosynthesis of secondary metabolites	GO:0009414 [Name: response to water deprivation]; GO:0016123 [Name: xanthophyll biosynthetic process]; GO:0009688 [Name: abscisic acid biosynthetic process]; GO:0050891 [Name: multicellular organismal water homeostasis]	GO:0031969 [Name: chloroplast membrane]; GO:0009535 [Name: chloroplast thylakoid membrane]	GO:0009540 [Name: zeaxanthin epoxidase [overall] activity]; GO:0071949 [Name: FAD binding]; GO:0052662 [Name: zeaxanthin epoxidase activity]	1725.05	0.9229	0.0036	0.0005	up				Os.21710.1.S1_at
Os.9612.1.S1_at	LOC_Os09g37006.1,LOC_Os09g37006.2	Os09g0542000,Os09g0542000	4347736	LOC4347736	PF01918	Q651C3; Q0IZY3	protein of unknown function domain containing protein, expressed	-	osa:4347736	-	-	-	-	-	-	GO:0003676 [Name: nucleic acid binding]	1281.32	1.5674	0	0	Down			Os.34701.1.S1_s_at	LOC_Os03g07130.1,LOC_Os03g07130.2,LOC_Os03g07130.3,LOC_Os03g07130.4,LOC_Os03g07130.5	Os03g0167500,Os03g0167500,Os03g0167500,Os03g0167500,Os03g0167500	4331745	LOC4331745	PF02225; PF13639	Q10R93	RING finger protein 13, putative, expressed	-	osa:4331745	K15692	-	-	-	GO:0015031 [Name: protein transport]	GO:0031902 [Name: late endosome membrane]; GO:0016021 [Name: integral component of membrane]; GO:0032586 [Name: protein storage vacuole membrane]; GO:0000139 [Name: Golgi membrane]	GO:0046872 [Name: metal ion binding]	1726.36	0.6642	0.0036	0.0005	up				Os.2209.1.S1_at
OsAffx.14122.1.S1_at	LOC_Os04g33940.1	Os04g0416000	4335807	LOC4335807	PF06916; PF16421; PF02319	Q7XTF4; A2XTA4; Q0JDB0	protein of unknown function DUF1279 domain containing protein, expressed	-	osa:4335807	K06620	-	-	-	GO:0000122 [Name: negative regulation of transcription from RNA polymerase II promoter]; GO:0045944 [Name: positive regulation of transcription from RNA polymerase II promoter]; GO:0051726 [Name: regulation of cell cycle]	GO:0009535 [Name: chloroplast thylakoid membrane]; GO:0005634 [Name: nucleus]; GO:0090575 [Name: RNA polymerase II transcription factor complex]	GO:0003677 [Name: DNA binding]; GO:0000981 [Name: RNA polymerase II transcription factor activity, sequence-specific DNA binding]; GO:0046983 [Name: protein dimerization activity]; GO:0043565 [Name: sequence-specific DNA binding]; GO:0008134 [Name: transcription factor binding]; GO:0003700 [Name: transcription factor activity, sequence-specific DNA binding]	1016.05	1.4908	0	0	Down			Os.4055.1.S1_at	LOC_Os03g36730.1	Os03g0565100	4333265	LOC4333265	PF04756	Q94I55	OST3/OST6 family protein, putative, expressed	-	osa:4333265	K12669	osa04141; osa00510; osa01100	osa04141 [Pathway Title: Protein processing in endoplasmic reticulum]; osa00510 [Pathway Title: N-Glycan biosynthesis]; osa01100 [Pathway Title: Metabolic pathways]	N-Glycan biosynthesis; Metabolic pathways; Protein processing in endoplasmic reticulum	GO:0018279 [Name: protein N-linked glycosylation via asparagine]	GO:0008250 [Name: oligosaccharyltransferase complex]; GO:0016021 [Name: integral component of membrane]	-	1728.98	1.4193	0.0036	0.0005	Down				Os.2404.1.S1_at
Os.291.1.S1_at	LOC_Os06g09290.1,LOC_Os06g09290.2	Os06g0192600,Os06g0192600	4340376	LOC4340376	PF00004	Q0DDX2; Q9FXT9; A6N137	26S protease regulatory subunit 7, putative, expressed	-	osa:4340376; osa:4330943	K03061	osa03050	osa03050 [Pathway Title: Proteasome]	Proteasome	GO:0045899 [Name: positive regulation of RNA polymerase II transcriptional preinitiation complex assembly]; GO:0030163 [Name: protein catabolic process]	GO:0005737 [Name: cytoplasm]; GO:0005634 [Name: nucleus]; GO:0008540 [Name: proteasome regulatory particle, base subcomplex]	GO:0005524 [Name: ATP binding]; GO:0016787 [Name: hydrolase activity]; GO:0017025 [Name: TBP-class protein binding]; GO:0008233 [Name: peptidase activity]	2021.35	1.3416	0.0098	0.0024	Down			Os.4244.1.S1_at	LOC_Os08g38900.1,LOC_Os08g38900.2,LOC_Os08g38900.3	Os08g0498100,Os08g0498100,Os08g0498100	4345934	LOC4345934	PF01596	Q9XGP7; A6MZL7	caffeoyl-CoA O-methyltransferase, putative, expressed	-	osa:4345934	K18883	-	-	-	GO:0032259 [Name: methylation]	GO:0005634 [Name: nucleus]	GO:0008757 [Name: S-adenosylmethionine-dependent methyltransferase activity]; GO:0008171 [Name: O-methyltransferase activity]; GO:0046872 [Name: metal ion binding]	1724.96	0.7716	0.0036	0.0005	up				Os.25677.1.S1_at
Os.12189.2.S1_at	LOC_Os11g38959.1	Os11g0602600	4331662; 4350869	LOC4331662; LOC4350869	PF01479; PF00163	A2ZFU3; A6N0R9; Q2R1J8	40S ribosomal protein S9-2, putative, expressed	-	osa:4331662; osa:4350869; osa:9268088	K02997	osa03010	osa03010 [Pathway Title: Ribosome]	Ribosome	GO:0006412 [Name: translation]; GO:0045903 [Name: positive regulation of translational fidelity]	GO:0015935 [Name: small ribosomal subunit]; GO:0022627 [Name: cytosolic small ribosomal subunit]	GO:0019843 [Name: rRNA binding]; GO:0003735 [Name: structural constituent of ribosome]	2020.74	1.2536	0.0097	0.0024	Down			Os.50823.1.S1_at	LOC_Os12g18900.1	Os12g0287300	4351999	LOC4351999	PF00266	Q0INV6	aminotransferase, putative, expressed	-	osa:4351999	K11717	osa00450; osa01100	osa01100 [Pathway Title: Metabolic pathways]; osa00450 [Pathway Title: Selenocompound metabolism]	Selenocompound metabolism; Metabolic pathways	GO:0001887 [Name: selenium compound metabolic process]; GO:0018283 [Name: iron incorporation into metallo-sulfur cluster]; GO:0010269 [Name: response to selenium ion]	GO:0009507 [Name: chloroplast]	GO:0009000 [Name: selenocysteine lyase activity]; GO:0031071 [Name: cysteine desulfurase activity]	1730.47	1.3295	0.0036	0.0005	Down				Os.26688.1.S3_s_at
Os.46109.1.S1_at	LOC_Os04g58970.1,LOC_Os04g58980.1,LOC_Os04g58980.1	Os04g0686300,Os04g0686300,Os04g0686500	4337470	LOC4337470	PF02594	B7EHD8	uncharacterized ACR, YggU family COG1872 containing protein, expressed	-	osa:4337470	K09131	-	-	-	-	-	-	2020.12	1.2407	0.0097	0.0024	Down			Os.9459.1.S1_at	LOC_Os04g50990.1	Os04g0598200	4336856	LOC4336856	PF00298; PF03946	Q0JAI2	L11 domain containing ribosomal protein, putative, expressed	-	osa:4336856	K02870	osa03010	osa03010 [Pathway Title: Ribosome]	Ribosome	GO:0000027 [Name: ribosomal large subunit assembly]; GO:0006412 [Name: translation]	GO:0022625 [Name: cytosolic large ribosomal subunit]; GO:0015934 [Name: large ribosomal subunit]	GO:0070180 [Name: large ribosomal subunit rRNA binding]; GO:0019843 [Name: rRNA binding]; GO:0003735 [Name: structural constituent of ribosome]	1729.12	1.4292	0.0036	0.0005	Down				Os.27067.2.A1_at
Os.48031.1.S1_x_at	LOC_Os06g39712.1,LOC_Os08g15270.1,LOC_Os10g21300.1,LOC_Os12g10590.1	None,None,None,None	4345092	-	PF00574	Q6Z505	OsClp10 - Putative Clp protease homologue, expressed	-	osa:4345092	K01358	-	-	-	-	-	GO:0004252 [Name: serine-type endopeptidase activity]	2007.47	0.7285	0.0097	0.0022	up			Os.10262.1.S1_at	LOC_Os08g02140.2,LOC_Os08g02140.3	Os08g0113300,Os08g0113300	4344499	LOC4344499	PF04564	Q0J8G2; Q6YXU5	STIP1 homology and U box-containing protein 1, putative, expressed	-	osa:4344499	K09561	osa04141; osa04120	osa04120 [Pathway Title: Ubiquitin mediated proteolysis]; osa04141 [Pathway Title: Protein processing in endoplasmic reticulum]	Ubiquitin mediated proteolysis; Protein processing in endoplasmic reticulum	-	-	GO:0004842 [Name: ubiquitin-protein transferase activity]	1724.26	0.7224	0.0035	0.0005	up				Os.27386.1.S1_at
Os.11599.1.S1_at	LOC_Os02g46420.1	Os02g0689500	4330369	LOC4330369	PF05340	Q6ZGY7	transposon protein, putative, unclassified, expressed	-	osa:4330369	-	-	-	-	-	-	-	2019.29	1.463	0.0096	0.0024	Down			Os.20829.1.S1_at	LOC_Os02g55630.1	Os02g0800000	4331034	LOC4331034	PF07683; PF02492	B7ESI8; Q0DWR2; Q69IK7	COBW domain containing protein, putative, expressed	-	osa:4331034	-	-	-	-	-	GO:0009536 [Name: plastid]	-	1725.32	1.2618	0.0035	0.0005	Down				Os.27820.1.S1_at
Os.23458.1.A1_x_at	LOC_Os05g02220.1,LOC_Os05g02220.2,LOC_Os05g02220.3,LOC_Os05g02220.4,LOC_Os05g02220.5	Os05g0113000,Os05g0113000,Os05g0113000,Os05g0113000,Os05g0113000	4337602	LOC4337602	PF01842	Q75L16	ACT domain containing protein, expressed	-	osa:4337602	-	-	-	-	-	-	-	2007.05	0.8043	0.0096	0.0021	up			Os.28458.1.S1_at	LOC_Os01g11040.1	Os01g0208600	9268854	LOC9268854	-	C7IWQ9; Q7XXS7; Q5QNA6	SCAR-like protein 2, putative, expressed	-	osa:9268854	-	-	-	-	GO:0030036 [Name: actin cytoskeleton organization]	GO:0005737 [Name: cytoplasm]; GO:0005856 [Name: cytoskeleton]	GO:0003779 [Name: actin binding]	1725.96	1.4025	0.0035	0.0005	Down				Os.28096.1.S1_at
Os.10333.1.S1_at	LOC_Os07g02800.2,LOC_Os07g02800.3	Os07g0119300,Os07g0119300	4342269	LOC4342269	-	Q7XIF1	MYB family transcription factor, putative, expressed	MYB_related	osa:4342269	-	-	-	-	-	GO:0005634 [Name: nucleus]	GO:0003677 [Name: DNA binding]	2018.53	1.2612	0.0095	0.0024	Down			Os.29063.2.S1_at	LOC_Os07g43460.1	Os07g0627700	4343979	LOC4343979	PF04116	Q0D4G3	sphingolipid C4-hydroxylase SUR2, putative, expressed	-	osa:4343979	K04713	osa00600; osa01100	osa01100 [Pathway Title: Metabolic pathways]; osa00600 [Pathway Title: Sphingolipid metabolism]	Metabolic pathways; Sphingolipid metabolism	GO:0008610 [Name: lipid biosynthetic process]	GO:0016021 [Name: integral component of membrane]; GO:0005789 [Name: endoplasmic reticulum membrane]	GO:0005506 [Name: iron ion binding]; GO:1990465 [Name: aldehyde oxygenase (deformylating) activity]; GO:0009924 [Name: octadecanal decarbonylase activity]; GO:0000170 [Name: sphingosine hydroxylase activity]	1725.99	1.4078	0.0035	0.0005	Down				Os.38856.1.A1_s_at
OsAffx.24709.1.S1_x_at	LOC_Os02g43690.3,LOC_Os01g08450.1	Os02g0653800,Os01g0179700	4330181	LOC4330181	PF00071	A6N045; Q6H8G2	ras-related protein, putative, expressed	-	osa:4330181	K07874	-	-	-	GO:0006888 [Name: ER to Golgi vesicle-mediated transport]; GO:0006886 [Name: intracellular protein transport]; GO:0032482 [Name: Rab protein signal transduction]	GO:0005789 [Name: endoplasmic reticulum membrane]; GO:0000139 [Name: Golgi membrane]	GO:0005525 [Name: GTP binding]; GO:0003924 [Name: GTPase activity]	2005.96	0.8232	0.0095	0.0021	up			Os.4189.1.S1_at	LOC_Os01g37910.1,LOC_Os01g37910.2,LOC_Os01g37910.3	Os01g0559600,Os01g0559600,Os01g0559600	4324683	LOC4324683	PF01650	Q9SSZ4; Q7F1B4; Q5K5B7	vacuolar-processing enzyme precursor, putative, expressed	-	osa:4324683	K01369	-	-	-	GO:0006624 [Name: vacuolar protein processing]; GO:0051603 [Name: proteolysis involved in cellular protein catabolic process]	GO:0005773 [Name: vacuole]	GO:0008233 [Name: peptidase activity]; GO:0004197 [Name: cysteine-type endopeptidase activity]	1727.3	1.204	0.0035	0.0005	Down				Os.4806.1.S1_at
OsAffx.26573.1.S1_x_at	LOC_Os04g52450.1,LOC_Os04g52450.2	Os04g0614600,Os04g0614600	4336983	LOC4336983	PF00202	Q8W2G1; Q7XN11	aminotransferase, putative, expressed	-	osa:4336983	K16871	osa00250; osa00650; osa01100	osa00250 [Pathway Title: Alanine, aspartate and glutamate metabolism]; osa00650 [Pathway Title: Butanoate metabolism]; osa01100 [Pathway Title: Metabolic pathways]	Alanine, aspartate and glutamate metabolism; Butanoate metabolism; Metabolic pathways	GO:0009102 [Name: biotin biosynthetic process]; GO:0009448 [Name: gamma-aminobutyric acid metabolic process]	GO:0005739 [Name: mitochondrion]	GO:0008483 [Name: transaminase activity]; GO:0030170 [Name: pyridoxal phosphate binding]; GO:0003867 [Name: 4-aminobutyrate transaminase activity]; GO:0034387 [Name: 4-aminobutyrate:pyruvate transaminase activity]; GO:0004015 [Name: adenosylmethionine-8-amino-7-oxononanoate transaminase activity]	2004.69	0.793	0.0094	0.0021	up			Os.48573.1.S1_at	LOC_Os04g32340.1	Os04g0394300	4335690	LOC4335690	PF00076	B7F489; Q0JDM0	RNA-binding motif protein, putative, expressed	-	osa:4335690	K13192	-	-	-	GO:0046833 [Name: positive regulation of RNA export from nucleus]	GO:0005634 [Name: nucleus]	GO:0003677 [Name: DNA binding]; GO:0003729 [Name: mRNA binding]; GO:0046872 [Name: metal ion binding]	1727.33	1.3642	0.0035	0.0005	Down				Os.5402.1.S1_at
Os.13973.3.S1_at	LOC_Os05g29030.1,LOC_Os05g29030.2	Os05g0358500,Os05g0358500	4338531	LOC4338531	PF00481	Q6L482	protein phosphatase 2C, putative, expressed	-	osa:4338531	-	-	-	-	-	-	GO:0004722 [Name: protein serine/threonine phosphatase activity]; GO:0004724 [Name: magnesium-dependent protein serine/threonine phosphatase activity]; GO:0046872 [Name: metal ion binding]	2012.96	1.5965	0.009	0.0022	Down			Os.8030.1.S1_at	LOC_Os09g19700.1	Os09g0361100	4346848	LOC4346848	PF07714; PF00069	A3BY11; Q6K551; Q0J2C1	protein kinase domain containing protein, expressed	-	osa:4346848	-	-	-	-	-	-	GO:0004672 [Name: protein kinase activity]; GO:0005524 [Name: ATP binding]; GO:0004674 [Name: protein serine/threonine kinase activity]	1723.23	0.652	0.0035	0.0005	up				Os.5650.1.S1_at
Os.12975.1.S1_at	LOC_Os03g13950.1,LOC_Os03g13950.2	Os03g0243100,Os03g0243100	4332220	LOC4332220	PF00241	Q10P87; B7EFI2	actin-depolymerizing factor, putative, expressed	-	osa:4332220	K05765	-	-	-	GO:0030042 [Name: actin filament depolymerization]	GO:0015629 [Name: actin cytoskeleton]	GO:0003779 [Name: actin binding]	2012.62	1.1576	0.0089	0.0022	Down			Os.9105.1.S1_at	LOC_Os09g33680.1,LOC_Os09g33680.2	Os09g0511600,Os09g0511600	4347545	LOC4347545	PF00232	B7F7K7	Os9bglu31 - beta-glucosidase, dhurrinase, similar to G. max hydroxyisourate hydrolase, expressed	-	osa:4347545	K01188	osa00500; osa00940; osa00460; osa01110; osa01100	osa00940 [Pathway Title: Phenylpropanoid biosynthesis]; osa00500 [Pathway Title: Starch and sucrose metabolism]; osa01110 [Pathway Title: Biosynthesis of secondary metabolites]; osa01100 [Pathway Title: Metabolic pathways]; osa00460 [Pathway Title: Cyanoamino acid metabolism]	Starch and sucrose metabolism; Metabolic pathways; Phenylpropanoid biosynthesis; Biosynthesis of secondary metabolites; Cyanoamino acid metabolism	GO:0005975 [Name: carbohydrate metabolic process]	GO:0031410 [Name: cytoplasmic vesicle]	GO:0102483 [Name: scopolin beta-glucosidase activity]; GO:0008422 [Name: beta-glucosidase activity]	1722.69	0.9355	0.0035	0.0005	up				Os.8018.3.S1_a_at
Os.5575.1.S1_s_at	LOC_Os02g39580.1	Os02g0608700	-	-	-	-	ZOS2-12 - C2H2 zinc finger protein, expressed	-	-	-	-	-	-	-	-	-	2012.44	1.349	0.0089	0.0022	Down			Os.9151.1.S1_at	LOC_Os07g09970.1	Os07g0198300	4342656	LOC4342656	PF14368	Q6Z387; B7EK19; Q84L70	LTPL84 - Protease inhibitor/seed storage/LTP family protein precursor, expressed	-	osa:4342656	-	-	-	-	-	GO:0016021 [Name: integral component of membrane]	GO:0003676 [Name: nucleic acid binding]	1723.11	0.9525	0.0035	0.0005	up				Os.8767.1.S1_x_at
Os.8168.1.S1_at	LOC_Os09g25320.1	Os09g0420800	4347085	LOC4347085	PF00240	P0C030; Q0J1Q2	ubiquitin family protein, putative, expressed	-	osa:4347085	K12158	-	-	-	GO:0019941 [Name: modification-dependent protein catabolic process]; GO:0016567 [Name: protein ubiquitination]	GO:0005737 [Name: cytoplasm]; GO:0005634 [Name: nucleus]	GO:0031386 [Name: protein tag]; GO:0031625 [Name: ubiquitin protein ligase binding]	2011.45	1.2756	0.0088	0.0022	Down			Os.20693.1.S1_at	LOC_Os11g41910.1	Os11g0638000	4350988	LOC4350988	PF14714; PF01926	Q0IRG5	GTP-binding protein, putative, expressed	-	osa:4350988	-	-	-	-	-	-	GO:0005525 [Name: GTP binding]	1723.07	1.2674	0.0034	0.0005	Down				Os.8914.1.S1_at
Os.329.1.S1_at	LOC_Os04g55670.1,LOC_Os04g55670.1	Os04g0650300,Os04g0650366	4337225	LOC4337225	PF03360	B9FCV3	glycosyltransferase family 43 protein, putative, expressed	-	osa:4337225	-	-	-	-	GO:0009834 [Name: plant-type secondary cell wall biogenesis]; GO:0071555 [Name: cell wall organization]; GO:0010417 [Name: glucuronoxylan biosynthetic process]	GO:0016021 [Name: integral component of membrane]; GO:0000139 [Name: Golgi membrane]	GO:0015018 [Name: galactosylgalactosylxylosylprotein 3-beta-glucuronosyltransferase activity]; GO:0042285 [Name: xylosyltransferase activity]	2010.8	1.4423	0.0087	0.0022	Down			Os.13978.1.S1_a_at	LOC_Os05g41240.1,LOC_Os05g41240.2,LOC_Os05g41240.3	Os05g0491500,Os05g0491500,Os05g0491500	4339175	LOC4339175	PF14379; PF00249	Q6F335	Myb-like DNA-binding domain containing protein, putative, expressed	G2-like	osa:4339175	-	-	-	-	-	GO:0005634 [Name: nucleus]	GO:0003677 [Name: DNA binding]	1720.62	1.4223	0.0033	0.0005	Down				Os.9758.1.S1_at
Os.338.3.S1_x_at	LOC_Os03g17980.1,LOC_Os03g17980.2,LOC_Os08g37800.1	Os03g0289100,Os03g0289100,Os08g0484600	4332495	LOC4332495	PF00627; PF02149; PF00069	Q9ZNT4; Q852Q0; A6MZP9; Q10MY9	CAMK_KIN1/SNF1/Nim1_like_AMPKh.2 - CAMK includes calcium/calmodulin depedent protein kinases, expressed	-	osa:4332495	K07198	osa04140; osa04931	osa04140 [Pathway Title: Regulation of autophagy]; osa04931 [Pathway Title: Insulin resistance]	Regulation of autophagy; Insulin resistance	-	GO:0005634 [Name: nucleus]	GO:0005524 [Name: ATP binding]; GO:0004674 [Name: protein serine/threonine kinase activity]; GO:0016301 [Name: kinase activity]	2010.37	1.3287	0.0087	0.0021	Down			Os.14589.1.S1_at	LOC_Os03g56241.1	Os03g0773150	9267266	LOC9267266	PF00253	Q7XZX4; A2ZG71	40S ribosomal protein S29, putative, expressed	-	osa:9267266; osa:4352308; osa:4350976	K02980	osa03010	osa03010 [Pathway Title: Ribosome]	Ribosome	GO:0006412 [Name: translation]	GO:0022627 [Name: cytosolic small ribosomal subunit]; GO:0005840 [Name: ribosome]	GO:0003735 [Name: structural constituent of ribosome]; GO:0008270 [Name: zinc ion binding]	1721.51	1.3817	0.0033	0.0005	Down				OsAffx.11954.1.S1_s_at
Os.3702.1.S1_at	LOC_Os06g02240.1	Os06g0112400	4339900	LOC4339900	PF00076	A6N0T3; Q5VRZ6	RNA recognition motif containing protein, putative, expressed	-	osa:4339900	-	-	-	-	-	-	GO:0003723 [Name: RNA binding]	2010.58	1.3532	0.0087	0.0022	Down			Os.37742.1.S1_at	LOC_Os03g54790.1,LOC_Os03g54880.1	Os03g0755100,Os03g0755900	4334151	ABCB25	PF00664; PF00005	I0IVW0; A6N0I2; Q9FNU2	ABC transporter, ATP-binding protein, putative, expressed	-	osa:4334151	-	-	-	-	GO:0010044 [Name: response to aluminum ion]; GO:1902602 [Name: aluminum ion transmembrane transport]; GO:0010217 [Name: cellular aluminum ion homeostasis]	GO:0009705 [Name: plant-type vacuole membrane]; GO:0016021 [Name: integral component of membrane]	GO:0005524 [Name: ATP binding]; GO:0042626 [Name: ATPase activity, coupled to transmembrane movement of substances]; GO:0015083 [Name: aluminum ion transmembrane transporter activity]; GO:0016887 [Name: ATPase activity]	1722.39	1.4433	0.0033	0.0005	Down				OsAffx.6057.1.S1_s_at
Os.8968.1.S1_x_at	LOC_Os02g48790.1,LOC_Os02g48790.2,LOC_Os02g48790.3,LOC_Os02g48790.4,LOC_Os02g48790.5	Os02g0719800,Os02g0719800,Os02g0719800,Os02g0719800,Os02g0719800	4330544	LOC4330544	PF04059; PF00076	Q6ZI17	AML1, putative, expressed	-	osa:4330544	-	-	-	-	GO:0045836 [Name: positive regulation of meiotic nuclear division]	-	GO:0003723 [Name: RNA binding]	1995.96	0.7844	0.0087	0.0019	up			Os.8942.2.S1_at	LOC_Os02g53700.1,LOC_Os02g53700.5	Os02g0777100,Os02g0777100	4330904	LOC4330904	PF02141; PF03456	Q6ZGD1	DENN domain containing protein, expressed	-	osa:4330904	-	-	-	-	-	-	-	1718.82	0.7159	0.0033	0.0004	up				Os.12032.1.S1_at
Os.8569.1.S1_at	LOC_Os04g48880.1	Os04g0578400	4336753	LOC4336753	PF04116	Q7XQ82	fatty acid hydroxylase, putative, expressed	-	osa:4336753	K15746	osa01100; osa00906; osa01110	osa01110 [Pathway Title: Biosynthesis of secondary metabolites]; osa01100 [Pathway Title: Metabolic pathways]; osa00906 [Pathway Title: Carotenoid biosynthesis]	Carotenoid biosynthesis; Metabolic pathways; Biosynthesis of secondary metabolites	GO:0008610 [Name: lipid biosynthetic process]	GO:0016021 [Name: integral component of membrane]	GO:0005506 [Name: iron ion binding]; GO:0016491 [Name: oxidoreductase activity]	1993.67	0.938	0.0085	0.0019	up			Os.9507.1.S1_at	LOC_Os03g48850.1,LOC_Os03g48850.2	Os03g0694900,Os03g0694900	4333799	LOC4333799	PF00133; PF08264	Q851K9	valyl-tRNA synthetase, putative, expressed	-	osa:4333799	K01873	osa00970	osa00970 [Pathway Title: Aminoacyl-tRNA biosynthesis]	Aminoacyl-tRNA biosynthesis	GO:0006438 [Name: valyl-tRNA aminoacylation]	GO:0005829 [Name: cytosol]	GO:0004832 [Name: valine-tRNA ligase activity]; GO:0002161 [Name: aminoacyl-tRNA editing activity]; GO:0005524 [Name: ATP binding]	1721.27	1.3705	0.0033	0.0005	Down				Os.26695.1.S1_at
Os.15355.1.S1_x_at	LOC_Os02g14440.1,LOC_Os02g14440.2	Os02g0240300,Os02g0240300	4328842	LOC4328842	PF00141	Q6ER49	peroxidase precursor, putative, expressed	-	osa:4328842	-	-	-	-	GO:0042744 [Name: hydrogen peroxide catabolic process]; GO:0006979 [Name: response to oxidative stress]	GO:0005576 [Name: extracellular region]	GO:0020037 [Name: heme binding]; GO:0004601 [Name: peroxidase activity]; GO:0046872 [Name: metal ion binding]	2006.57	0.8549	0.0084	0.0021	Down			Os.18115.1.S1_at	LOC_Os11g09170.1,LOC_Os11g09170.2	Os11g0198100,Os11g0198100	4349998	LOC4349998	PF04765	Q0IU20; B7EHD7	hydrolase, acting on carbon-nitrogen, putative, expressed	-	osa:4349998	-	-	-	-	GO:0006672 [Name: ceramide metabolic process]	GO:0016021 [Name: integral component of membrane]	GO:0016811 [Name: hydrolase activity, acting on carbon-nitrogen (but not peptide) bonds, in linear amides]	1718.56	1.3721	0.0032	0.0005	Down				Os.2363.1.S1_a_at
Os.19307.1.S1_at	LOC_Os08g03430.1,LOC_Os08g03430.2	Os08g0128200,Os08g0128200	4344576	LOC4344576	PF12056	Q6ZK43	extracellular ligand-gated ion channel, putative, expressed	-	osa:4344576	-	-	-	-	-	GO:0005634 [Name: nucleus]; GO:0016021 [Name: integral component of membrane]	-	2002.98	1.3792	0.0081	0.002	Down			Os.57480.1.S1_x_at	LOC_Os07g40580.1	Os07g0597000	4343796	LOC4343796	PF01287	Q84ZK1; Q9ZSU2	eukaryotic translation initiation factor 5A, putative, expressed	-	osa:4343796	K03263	-	-	-	GO:0045901 [Name: positive regulation of translational elongation]; GO:0045905 [Name: positive regulation of translational termination]; GO:0006452 [Name: translational frameshifting]	-	GO:0003746 [Name: translation elongation factor activity]; GO:0043022 [Name: ribosome binding]; GO:0003743 [Name: translation initiation factor activity]	1718.42	1.3233	0.0032	0.0005	Down				Os.52508.1.S1_at
Os.18231.1.S1_at	LOC_Os07g32380.1	Os07g0507000	4343331	LOC4343331	PF00481	B8B6G2; Q0D673	protein phosphatase 2C, putative, expressed	-	osa:4343331	-	-	-	-	-	-	GO:0004722 [Name: protein serine/threonine phosphatase activity]; GO:0004724 [Name: magnesium-dependent protein serine/threonine phosphatase activity]; GO:0046872 [Name: metal ion binding]	2002.42	1.4696	0.008	0.002	Down			Os.10593.1.S1_at	LOC_Os08g41390.1,LOC_Os08g41390.2	Os08g0525600,Os08g0525600	4346090	LOC4346090	PF00254; PF00515	Q7F1F2	peptidyl-prolyl isomerase, putative, expressed	-	osa:4346090	K09571	-	-	-	GO:0061077 [Name: chaperone-mediated protein folding]; GO:0000413 [Name: protein peptidyl-prolyl isomerization]	GO:0005737 [Name: cytoplasm]	GO:0003755 [Name: peptidyl-prolyl cis-trans isomerase activity]	1714.65	1.236	0.0031	0.0004	Down				Os.8549.1.S1_at
Os.22454.1.S1_x_at	LOC_Os01g16640.1,LOC_Os01g21440.2,LOC_Os01g21440.1	Os01g0273000,Os01g0316800,Os01g0316800	4325173	LOC4325173	PF05160	Q0JNQ2	split hand/foot malformation type 1, putative, expressed	-	osa:4325173	K10881	osa03440; osa03050	osa03050 [Pathway Title: Proteasome]; osa03440 [Pathway Title: Homologous recombination]	Proteasome; Homologous recombination	GO:0006406 [Name: mRNA export from nucleus]; GO:0043248 [Name: proteasome assembly]; GO:0000724 [Name: double-strand break repair via homologous recombination]	GO:0008541 [Name: proteasome regulatory particle, lid subcomplex]	-	2001.36	1.3404	0.008	0.0019	Down			Os.10683.1.A1_s_at	LOC_Os02g51300.1	Os02g0747600	4330724	LOC4330724	PF00847	Q2TQ37; Q0DXK7	AP2 domain containing protein, expressed	-	osa:4330724	-	-	-	-	-	GO:0005634 [Name: nucleus]	GO:0003677 [Name: DNA binding]; GO:0003700 [Name: transcription factor activity, sequence-specific DNA binding]	1714.4	0.6399	0.0031	0.0004	up				Os.10135.1.S1_at
Os.14654.1.S1_at	LOC_Os08g42740.2,LOC_Os08g42740.3,LOC_Os08g42740.4,LOC_Os08g42740.5,LOC_Os08g42740.6,LOC_Os08g42740.7	Os08g0540300,Os08g0540300,Os08g0540300,Os08g0540300,Os08g0540300,Os08g0540300	4346186	LOC4346186	PF01485	Q6ZIV0	IBR domain containing protein, putative, expressed	-	osa:4346186	K11968	-	-	-	GO:0032436 [Name: positive regulation of proteasomal ubiquitin-dependent protein catabolic process]; GO:0000209 [Name: protein polyubiquitination]; GO:0006511 [Name: ubiquitin-dependent protein catabolic process]	GO:0000151 [Name: ubiquitin ligase complex]; GO:0005737 [Name: cytoplasm]	GO:0031624 [Name: ubiquitin conjugating enzyme binding]; GO:0046872 [Name: metal ion binding]; GO:0061630 [Name: ubiquitin protein ligase activity]	1985.92	0.8357	0.0077	0.0017	up			Os.16129.1.S1_at	LOC_Os02g52140.1,LOC_Os02g52140.2	Os02g0757900,Os02g0757900	4330785	LOC4330785	PF00076	Q6Z7V3; Q6Z7V4	RNA recognition motif containing protein, putative, expressed	-	osa:4330785	K14396	osa03015	osa03015 [Pathway Title: mRNA surveillance pathway]	mRNA surveillance pathway	-	-	GO:0003723 [Name: RNA binding]	1715.78	0.6939	0.0031	0.0004	up				Os.19800.1.S1_at
Os.11662.1.S1_at	LOC_Os09g29970.1	Os09g0476000	4347362	LOC4347362	-	Q651Z1	TMV-MP30 binding protein 2C, putative, expressed	-	osa:4347362	-	-	-	-	GO:0010497 [Name: plasmodesmata-mediated intercellular transport]	-	GO:0008017 [Name: microtubule binding]	1983.24	0.9111	0.0075	0.0016	up			Os.20065.1.S1_at	LOC_Os05g05240.1,LOC_Os05g05240.2	Os05g0144400,Os05g0144400	4337785	LOC4337785	PF00149	Q0DKT4; Q60EX6	serine/threonine protein phosphatase, putative, expressed	-	osa:4337785	K01090	-	-	-	GO:0009742 [Name: brassinosteroid mediated signaling pathway]	GO:0005737 [Name: cytoplasm]; GO:0005634 [Name: nucleus]	GO:0046872 [Name: metal ion binding]; GO:0004722 [Name: protein serine/threonine phosphatase activity]	1714.31	0.6712	0.0031	0.0004	up				Os.7576.1.S1_at
Os.6728.1.S1_a_at	LOC_Os03g22730.1	Os03g0350100	4332840	LOC4332840	PF01798; PF08156	Q10LH4; Q762B1; Q0DRW2; Q10LH5; O80401; Q762B2; A2XGN8	nucleolar protein NOP5-1, putative, expressed	-	osa:4332841; osa:4332840	K14565	osa03008	osa03008 [Pathway Title: Ribosome biogenesis in eukaryotes]	Ribosome biogenesis in eukaryotes	-	GO:0031428 [Name: box C/D snoRNP complex]; GO:0032040 [Name: small-subunit processome]	GO:0030515 [Name: snoRNA binding]	1993.99	1.0226	0.0074	0.0018	Down			Os.24539.1.S1_at	LOC_Os09g21110.1	Os09g0378300	4346920	LOC4346920	PF08264; PF00133	Q6H4P7	leucyl-tRNA synthetase, cytoplasmic, putative, expressed	-	osa:4346920	K01869	osa00970	osa00970 [Pathway Title: Aminoacyl-tRNA biosynthesis]	Aminoacyl-tRNA biosynthesis	GO:0006429 [Name: leucyl-tRNA aminoacylation]	-	GO:0002161 [Name: aminoacyl-tRNA editing activity]; GO:0005524 [Name: ATP binding]; GO:0004823 [Name: leucine-tRNA ligase activity]	1715	1.2813	0.0031	0.0004	Down				Os.8147.1.S1_a_at
Os.21578.1.S1_at	LOC_Os02g44370.1	Os02g0663100	4330231	LOC4330231	PF03514	Q6H6L0	scarecrow, putative, expressed	bHLH	osa:4330231	-	-	-	-	-	GO:0005634 [Name: nucleus]	GO:0043565 [Name: sequence-specific DNA binding]; GO:0003700 [Name: transcription factor activity, sequence-specific DNA binding]	1978.96	0.8183	0.0072	0.0016	up			Os.28272.2.S1_at	LOC_Os11g01490.1,LOC_Os11g01490.2,LOC_Os12g01500.1	Os11g0106200,Os11g0106200,Os12g0105700	4349555	LOC4349555	PF01103	Q0IV82; B7EKD0; Q2QYV1; B7ECH1	outer membrane protein, OMP85 family, putative, expressed	-	osa:4351261; osa:4349555	K07277	-	-	-	-	GO:0019867 [Name: outer membrane]	-	1714.74	1.4068	0.0031	0.0004	Down				Os.10419.1.S1_a_at
Os.2247.1.S1_at	LOC_Os10g32820.1	Os10g0465800	4348839	LOC4348839	PF01157	Q9AV87; Q9ZSU8	60S ribosomal protein L21-2, putative, expressed	-	osa:4348839	K02889	osa03010	osa03010 [Pathway Title: Ribosome]	Ribosome	GO:0006412 [Name: translation]	GO:0005840 [Name: ribosome]	GO:0003735 [Name: structural constituent of ribosome]	1991.57	1.2275	0.0072	0.0017	Down			Os.35800.1.S1_s_at	LOC_Os11g06040.1,LOC_Os11g06040.2	Os11g0159000,Os11g0159000	4349840	LOC4349840	PF02194	Q0IUF9	PX domain containing protein, putative, expressed	-	osa:4349840	-	-	-	-	-	GO:0016021 [Name: integral component of membrane]	-	1715.22	0.6865	0.0031	0.0004	up				Os.11997.1.S1_at
Os.9363.2.S1_x_at	LOC_Os04g51630.1,LOC_Os04g51630.3,LOC_Os04g51630.2	Os04g0605900,Os04g0605900,Os04g0605900	4336914	LOC4336914	PF00327; PF08079	Q0JAC6	60S ribosomal protein L7, putative, expressed	-	osa:4336914	K02937	osa03010	osa03010 [Pathway Title: Ribosome]	Ribosome	GO:0000463 [Name: maturation of LSU-rRNA from tricistronic rRNA transcript (SSU-rRNA, 5.8S rRNA, LSU-rRNA)]	GO:0022625 [Name: cytosolic large ribosomal subunit]	GO:0003735 [Name: structural constituent of ribosome]	1992.47	1.2452	0.0072	0.0018	Down			Os.8226.1.S1_at	LOC_Os01g73780.1	Os01g0969000	4323834	LOC4323834	-	Q8S9Z3	chloroplast outer envelope 24 kD protein, putative, expressed	-	osa:4323834	-	-	-	-	-	GO:0009507 [Name: chloroplast]; GO:0016021 [Name: integral component of membrane]	-	1714.37	0.9731	0.0031	0.0004	Down				Os.12637.1.S1_at
Os.11084.1.S1_at	LOC_Os12g20310.1,LOC_Os12g20310.2	Os12g0298600,Os12g0298600	4352029	LOC4352029	PF09340	Q0INT2	sarcoma antigen NY-SAR-91, putative, expressed	-	osa:4352029	K11344	-	-	-	GO:0016573 [Name: histone acetylation]	GO:0000123 [Name: histone acetyltransferase complex]	-	1976.76	0.8487	0.007	0.0015	up			Os.9998.1.S1_at	LOC_Os01g68324.3	Os01g0911200	4324876	LOC4324876	PF05817	Q5N7W3	dolichyl-diphosphooligosaccharide--protein glycosyltransferase 63 kDasubunit precursor, putative, expressed	-	osa:4324876	K12667	osa04141; osa00510; osa01100	osa00510 [Pathway Title: N-Glycan biosynthesis]; osa04141 [Pathway Title: Protein processing in endoplasmic reticulum]; osa01100 [Pathway Title: Metabolic pathways]	N-Glycan biosynthesis; Metabolic pathways; Protein processing in endoplasmic reticulum	GO:0006487 [Name: protein N-linked glycosylation]; GO:0009409 [Name: response to cold]	GO:0008250 [Name: oligosaccharyltransferase complex]; GO:0009506 [Name: plasmodesma]; GO:0005886 [Name: plasma membrane]; GO:0016021 [Name: integral component of membrane]; GO:0005794 [Name: Golgi apparatus]; GO:0005739 [Name: mitochondrion]; GO:0009505 [Name: plant-type cell wall]; GO:0005774 [Name: vacuolar membrane]	-	1715.21	1.3564	0.0031	0.0004	Down				Os.14181.1.S1_at
Os.12349.1.S1_at	LOC_Os03g16980.1,LOC_Os03g16980.2,LOC_Os03g16980.3,LOC_Os03g16980.4	Os03g0278000,Os03g0278000,Os03g0278000,Os03g0278000	4332424	LOC4332424	PF16363	S4U0D9; Q8W3J0; Q10N94; B8AL25	NAD dependent epimerase/dehydratase family domain containing protein, expressed	-	osa:4332424	K08678	osa00500; osa01100; osa00520	osa01100 [Pathway Title: Metabolic pathways]; osa00500 [Pathway Title: Starch and sucrose metabolism]; osa00520 [Pathway Title: Amino sugar and nucleotide sugar metabolism]	Amino sugar and nucleotide sugar metabolism; Metabolic pathways; Starch and sucrose metabolism	GO:0042732 [Name: D-xylose metabolic process]	GO:0005737 [Name: cytoplasm]	GO:0070403 [Name: NAD+ binding]; GO:0048040 [Name: UDP-glucuronate decarboxylase activity]	1989.58	1.2979	0.007	0.0017	Down			Os.10875.2.S1_x_at	LOC_Os02g15880.1,LOC_Os02g15880.2,LOC_Os02g15880.3,LOC_Os02g15885.1	Os02g0259100,Os02g0259100,Os02g0259100,Os02g0259100	4328931	LOC4328931	-	Q0E296	CPuORF16 - conserved peptide uORF-containing transcript, expressed	-	osa:4328931	-	-	-	-	-	-	-	1711.99	1.4312	0.003	0.0004	Down				Os.14185.2.S1_a_at
Os.45975.1.S1_a_at	LOC_Os03g27250.1	Os03g0389900	4333015	LOC4333015	PF01636; PF12937; PF00646	Q75LR4; A2XHI8	OsFBO14 - F-box and other domain containing protein, expressed	-	osa:4333015	-	-	-	-	-	-	-	1977.8	0.7087	0.007	0.0015	up			Os.16406.1.S1_at	LOC_Os09g23370.2	Os09g0397700	4346983	LOC4346983	PF04828	Q6ERD5	proline-rich protein 6, putative, expressed	-	osa:4346983	-	-	-	-	-	-	GO:0016846 [Name: carbon-sulfur lyase activity]	1709.83	1.3961	0.003	0.0004	Down				Os.16128.2.S1_at
Os.17836.1.S1_at	LOC_Os01g50320.1,LOC_Os01g50320.2	Os01g0698100,Os01g0698100	4325296	LOC4325296	PF01805; PF09750	Q5N8K0	surp module family protein, putative, expressed	-	osa:4325296	-	-	-	-	GO:0000395 [Name: mRNA 5'-splice site recognition]	GO:0005739 [Name: mitochondrion]	GO:0003723 [Name: RNA binding]	1975.9	0.7135	0.0069	0.0015	up			Os.46312.1.S1_a_at	LOC_Os10g33960.1,LOC_Os10g33960.2,LOC_Os10g33960.4	Os10g0480200,Os10g0480200,Os10g0480200	4348919	LOC4348919	PF00046; PF01852; PF08670	A2Z8L4; F4MGX2; Q9AV49	START domain containing protein, expressed	HD-ZIP	osa:4348919	K09338	-	-	-	GO:0006355 [Name: regulation of transcription, DNA-templated]	GO:0005634 [Name: nucleus]	GO:0008289 [Name: lipid binding]; GO:0003677 [Name: DNA binding]	1710.67	1.3183	0.003	0.0004	Down				Os.16333.1.S1_at
Os.27508.1.S1_a_at	LOC_Os03g25970.1,LOC_Os03g25970.2	Os03g0376800,Os03g0376800	4332959	LOC4332959	PF00013	Q10KN9	KH domain-containing protein, putative, expressed	-	osa:4332959	K13162	-	-	-	-	-	GO:0003723 [Name: RNA binding]	1975.25	0.7708	0.0069	0.0015	up			Os.8040.1.S1_a_at	LOC_Os02g29480.1	Os02g0497700	4329411	LOC4329411	PF02136; PF00076; PF07714	Q6K925; Q0E129; Q2QW32	RNA-binding protein-like, putative, expressed	-	osa:4329411	-	-	-	-	-	GO:1990904 [Name: ribonucleoprotein complex]; GO:0005829 [Name: cytosol]; GO:0016021 [Name: integral component of membrane]	GO:0003729 [Name: mRNA binding]; GO:0003723 [Name: RNA binding]; GO:0004672 [Name: protein kinase activity]; GO:0005524 [Name: ATP binding]	1713.39	1.2214	0.003	0.0004	Down				Os.16915.1.S1_at
Os.142.2.A1_a_at	LOC_Os01g25484.1,LOC_Os01g25484.2,LOC_Os01g25484.3,LOC_Os02g52730.1	Os01g0357100,Os01g0357100,Os01g0357100,Os02g0765900	4326014	LOC4326014	PF01077; PF03460	Q0JMV6; Q42997	ferredoxin--nitrite reductase, putative, expressed	-	osa:4326014	K00366	osa00910	osa00910 [Pathway Title: Nitrogen metabolism]	Nitrogen metabolism	GO:0042128 [Name: nitrate assimilation]	GO:0009507 [Name: chloroplast]	GO:0020037 [Name: heme binding]; GO:0051536 [Name: iron-sulfur cluster binding]; GO:0016491 [Name: oxidoreductase activity]; GO:0046872 [Name: metal ion binding]; GO:0048307 [Name: ferredoxin-nitrite reductase activity]; GO:0051539 [Name: 4 iron, 4 sulfur cluster binding]	1986.24	1.2536	0.0068	0.0016	Down			Os.12175.1.S1_at	LOC_Os02g43930.1,LOC_Os02g43930.2,LOC_Os02g43930.3	Os02g0656500,Os02g0656500,Os02g0656500	4330201	LOC4330201	PF00226; PF01556; PF00684	Q0DYZ8	chaperone protein dnaJ, putative, expressed	-	osa:4330201	K09503	osa04141	osa04141 [Pathway Title: Protein processing in endoplasmic reticulum]	Protein processing in endoplasmic reticulum	GO:0009408 [Name: response to heat]; GO:0006457 [Name: protein folding]	GO:0005829 [Name: cytosol]	GO:0046872 [Name: metal ion binding]; GO:0031072 [Name: heat shock protein binding]; GO:0051082 [Name: unfolded protein binding]; GO:0005524 [Name: ATP binding]	1708.32	0.6749	0.0029	0.0004	up				Os.18706.1.S1_x_at
OsAffx.32225.1.S1_x_at	LOC_Os01g57966.1,LOC_Os04g16736.1,LOC_Os10g21254.1,LOC_Os10g38216.1,LOC_Os04g16762.1	None,None,None,None,None	-	-	PF00515	-	photosystem I assembly protein ycf3, putative, expressed	-	-	-	-	-	-	-	-	-	1972.71	0.7216	0.0067	0.0014	up			Os.19417.1.S1_a_at	LOC_Os08g40150.1,LOC_Os08g40150.2	Os08g0512400,Os08g0512400	4346014	LOC4346014	PF03479	Q0J4I3	AT hook motif domain containing protein, expressed	-	osa:4346014	-	-	-	-	-	-	GO:0003680 [Name: AT DNA binding]	1709.54	0.6183	0.0029	0.0004	up				Os.18993.2.S1_x_at
Os.12196.1.S1_at	LOC_Os02g33450.1,LOC_Os02g33450.2	Os02g0537700,Os02g0537700	4329578	LOC4329578	PF10417; PF00578	B7EFL3; A6MZU3; Q6ER94	peroxiredoxin, putative, expressed	-	osa:4329578	K03386	-	-	-	GO:0042744 [Name: hydrogen peroxide catabolic process]; GO:0006979 [Name: response to oxidative stress]; GO:0045454 [Name: cell redox homeostasis]	GO:0009570 [Name: chloroplast stroma]	GO:0008379 [Name: thioredoxin peroxidase activity]; GO:0051920 [Name: peroxiredoxin activity]	1983.87	1.2239	0.0066	0.0016	Down			Os.37329.1.S1_at	LOC_Os09g39540.1,LOC_Os09g39540.2	Os09g0568800,Os09g0568800	4347899	LOC4347899	PF03297	Q652P8	40S ribosomal protein S25, putative, expressed	-	osa:4347899	K02975	osa03010	osa03010 [Pathway Title: Ribosome]	Ribosome	-	GO:0005840 [Name: ribosome]	-	1708.76	1.3662	0.0029	0.0004	Down				Os.21040.1.S1_at
OsAffx.7733.1.S1_at	LOC_Os12g29330.1	Os12g0477400	4352203	LOC4352203	PF02365	Q2QQZ6	no apical meristem protein, putative, expressed	C3H	osa:4352203	-	-	-	-	GO:0006355 [Name: regulation of transcription, DNA-templated]	GO:0005634 [Name: nucleus]	GO:0003677 [Name: DNA binding]	1971.59	0.925	0.0066	0.0014	up			Os.48038.1.S1_at	LOC_Os02g55340.1	Os02g0796700	4331010	LOC4331010	PF00400	Q0DWT3	WD domain and HEAT domain containing protein, putative, expressed	-	osa:4331010	-	-	-	-	-	-	-	1707.95	0.6769	0.0029	0.0004	up				Os.22911.1.S1_a_at
Os.11487.1.S1_s_at	LOC_Os01g64090.1,LOC_Os02g21660.1,LOC_Os02g21660.3,LOC_Os02g21660.2	Os01g0860300,Os02g0321900,Os02g0321900,Os02g0321900	4325065	LOC4325065	PF00687	Q5QL84; Q0JHJ4; A2WX71; B7F845; B7F9R7; Q8LR24; Q6YZI6	L1P family of ribosomal proteins domain containing protein, expressed	-	osa:9266191; osa:4325065	K02865	osa03010	osa03010 [Pathway Title: Ribosome]	Ribosome	GO:0006412 [Name: translation]; GO:0000470 [Name: maturation of LSU-rRNA]	GO:0005840 [Name: ribosome]; GO:0015934 [Name: large ribosomal subunit]; GO:0022625 [Name: cytosolic large ribosomal subunit]	GO:0003735 [Name: structural constituent of ribosome]; GO:0003723 [Name: RNA binding]	1982.42	1.1339	0.0065	0.0016	Down			Os.53552.1.S1_at	LOC_Os05g05280.1	Os05g0145000	4337790	LOC4337790	PF13639	Q6AUI1	zinc finger family protein, putative, expressed	-	osa:4337790	K16284	-	-	-	GO:0010182 [Name: sugar mediated signaling pathway]	GO:0016021 [Name: integral component of membrane]	GO:0004842 [Name: ubiquitin-protein transferase activity]	1708.68	0.7024	0.0029	0.0004	up				Os.25687.1.S1_x_at
Os.22635.1.S1_s_at	LOC_Os10g10080.1,LOC_Os10g10080.2,LOC_Os10g10080.3	Os10g0180000,Os10g0180000,Os10g0180000	4348204	LOC4348204	PF03016	Q33AH8	exostosin family domain containing protein, expressed	-	osa:4348204	-	-	-	-	GO:0006486 [Name: protein glycosylation]; GO:0071555 [Name: cell wall organization]	GO:0000139 [Name: Golgi membrane]; GO:0016021 [Name: integral component of membrane]	GO:0016757 [Name: transferase activity, transferring glycosyl groups]	1983.01	1.4457	0.0065	0.0016	Down			Os.5874.1.S1_at	LOC_Os06g34450.1	Os06g0535400	4341214	LOC4341214	PF13639	Q5Z5F2	zinc finger, C3HC4 type domain containing protein, expressed	-	osa:4341214	-	-	-	-	GO:0016567 [Name: protein ubiquitination]	GO:0016021 [Name: integral component of membrane]	GO:0004842 [Name: ubiquitin-protein transferase activity]; GO:0046872 [Name: metal ion binding]	1708.49	1.2205	0.0029	0.0004	Down				Os.26684.1.S1_at
Os.3409.1.S1_at	LOC_Os03g59040.1,LOC_Os03g59040.2	Os03g0805100,Os03g0805100	4334492	LOC4334492	PF00494	O22105	squalene synthetase, putative, expressed	-	osa:4334492	K00801	osa00909; osa01100; osa01130; osa00100; osa01110	osa01130 [Pathway Title: Biosynthesis of antibiotics]; osa01100 [Pathway Title: Metabolic pathways]; osa00909 [Pathway Title: Sesquiterpenoid and triterpenoid biosynthesis]; osa00100 [Pathway Title: Steroid biosynthesis]; osa01110 [Pathway Title: Biosynthesis of secondary metabolites]	Metabolic pathways; Biosynthesis of secondary metabolites; Biosynthesis of antibiotics; Sesquiterpenoid and triterpenoid biosynthesis; Steroid biosynthesis	GO:0006696 [Name: ergosterol biosynthetic process]; GO:0045338 [Name: farnesyl diphosphate metabolic process]	GO:0005789 [Name: endoplasmic reticulum membrane]; GO:0016021 [Name: integral component of membrane]	GO:0051996 [Name: squalene synthase activity]; GO:0004310 [Name: farnesyl-diphosphate farnesyltransferase activity]	1968.67	0.8382	0.0064	0.0014	up			Os.16927.1.S1_at	LOC_Os02g56170.1	Os02g0805500	4331065	LOC4331065	PF00459	Q0DWN3	inositol-1-monophosphatase, putative, expressed	-	osa:4331065	K01082	osa00920; osa01100; osa01130	osa01100 [Pathway Title: Metabolic pathways]; osa01130 [Pathway Title: Biosynthesis of antibiotics]; osa00920 [Pathway Title: Sulfur metabolism]	Sulfur metabolism; Metabolic pathways; Biosynthesis of antibiotics	GO:0046854 [Name: phosphatidylinositol phosphorylation]; GO:0016311 [Name: dephosphorylation]; GO:0006790 [Name: sulfur compound metabolic process]	GO:0005737 [Name: cytoplasm]	GO:0008441 [Name: 3'(2'),5'-bisphosphate nucleotidase activity]	1705.43	1.3115	0.0028	0.0004	Down				Os.26698.1.S1_a_at
Os.7688.1.S1_at	LOC_Os10g31040.1,LOC_Os10g31040.3,LOC_Os10g31040.4,LOC_Os10g31040.5,LOC_Os10g31040.2,LOC_Os10g31040.6	Os10g0447900,Os10g0447900,Os10g0447900,Os10g0447900,Os10g0447900,Os10g0447900	4348760	LOC4348760	PF03600	Q0IXC7	Citrate transporter protein, putative, expressed	-	osa:4348760	-	-	-	-	GO:0055085 [Name: transmembrane transport]	GO:0016021 [Name: integral component of membrane]	-	1967.32	0.8542	0.0063	0.0014	up			Os.20603.1.S1_at	LOC_Os06g28970.1	Os06g0484600	4341063	LOC4341063	PF01722	Q0DC49; Q67VQ4; B8B2E6	bolA, putative, expressed	-	osa:4341063	-	-	-	-	-	GO:0005739 [Name: mitochondrion]; GO:0009507 [Name: chloroplast]	-	1705.26	1.3602	0.0028	0.0004	Down				Os.26803.1.S1_at
Os.2807.1.S1_a_at	LOC_Os03g56840.1,LOC_Os03g56840.2	Os03g0781000,Os03g0781000	9269534	LOC9269534	PF01926	C7J040	GTP-binding protein, putative, expressed	-	osa:9269534	-	-	-	-	-	-	GO:0005525 [Name: GTP binding]	1961.85	0.8378	0.006	0.0013	up			Os.24612.1.A1_at	LOC_Os05g04960.1	Os05g0141700	4337765	LOC4337765	PF00300	Q75KG7	phosphoglycerate mutase, putative, expressed	-	osa:4337765	-	-	-	-	-	-	GO:0003824 [Name: catalytic activity]	1706.94	1.2878	0.0028	0.0004	Down				Os.3001.1.S1_at
Os.18498.1.S1_at	LOC_Os08g37490.1	Os08g0480800	4345850	LOC4345850	PF00244	A6N053; Q0J4Z1; Q84J55	14-3-3 protein, putative, expressed	-	osa:4345850	K06630	-	-	-	-	-	GO:0019904 [Name: protein domain specific binding]	1960.14	0.7935	0.0059	0.0013	up			Os.26472.1.S1_at	LOC_Os04g40630.1,LOC_Os04g40630.2,LOC_Os04g40630.3,LOC_Os04g40630.4	Os04g0482300,Os04g0482300,Os04g0482300,Os04g0482300	4336193	LOC4336193	PF02135; PF00651	Q7XUP5	BTBZ4 - Bric-a-Brac, Tramtrack, Broad Complex BTB domain with TAZ zinc finger and Calmodulin-binding domains, expressed	-	osa:4336193	-	-	-	-	GO:0006355 [Name: regulation of transcription, DNA-templated]	GO:0005634 [Name: nucleus]	GO:0003712 [Name: transcription cofactor activity]; GO:0004402 [Name: histone acetyltransferase activity]; GO:0008270 [Name: zinc ion binding]	1705.25	1.4326	0.0028	0.0004	up				Os.32568.1.S1_at
Os.53830.1.S1_at	LOC_Os02g40840.1	Os02g0621800	4330017	LOC4330017	PF05199; PF00732	Q6K9N5	alcohol oxidase, putative, expressed	-	osa:4330017	K17756	-	-	-	-	GO:0016020 [Name: membrane]	GO:0050660 [Name: flavin adenine dinucleotide binding]; GO:0046577 [Name: long-chain-alcohol oxidase activity]	1975.14	1.0443	0.0059	0.0014	Down			Os.43012.1.A1_at	LOC_Os01g72940.1	Os01g0959800	4325237	LOC4325237	PF13833; PF02666	-	phosphatidylserine decarboxylase, putative, expressed	-	osa:4325237	-	-	-	-	-	GO:0009536 [Name: plastid]	-	1705.42	1.2773	0.0028	0.0004	Down				Os.32732.1.S1_at
Os.11094.1.A1_at	LOC_Os04g46220.1	Os04g0546800	4336571	LOC4336571	PF00847	Q0JB99	ethylene-responsive transcription factor, putative, expressed	GATA	osa:4336571	K09286	-	-	-	-	GO:0005634 [Name: nucleus]	GO:0003700 [Name: transcription factor activity, sequence-specific DNA binding]; GO:0003677 [Name: DNA binding]	1958	0.8701	0.0058	0.0012	up			Os.4891.1.S1_at	LOC_Os03g06200.1	Os03g0157900	9270715	LOC9270715	PF00266	C7IZP3; Q8LMR0	aminotransferase, putative, expressed	-	osa:9270715	-	-	-	-	GO:0006564 [Name: L-serine biosynthetic process]	GO:0009570 [Name: chloroplast stroma]	GO:0004648 [Name: O-phospho-L-serine:2-oxoglutarate aminotransferase activity]	1705.43	1.3192	0.0028	0.0004	Down				Os.35718.1.S1_at
Os.12338.1.S1_at	LOC_Os05g42330.1	Os05g0503000	4339247	LOC4339247	PF04144	Q60EA5; B7EVJ1	secretory carrier-associated membrane protein, putative, expressed	-	osa:4339247	-	-	-	-	GO:0015031 [Name: protein transport]	GO:0005794 [Name: Golgi apparatus]; GO:0000139 [Name: Golgi membrane]; GO:0055038 [Name: recycling endosome membrane]; GO:0032588 [Name: trans-Golgi network membrane]; GO:0030658 [Name: transport vesicle membrane]; GO:0005886 [Name: plasma membrane]; GO:0016021 [Name: integral component of membrane]	-	1957.88	0.911	0.0058	0.0012	up			Os.14102.1.S1_at	LOC_Os11g33240.1,LOC_Os11g33240.2,LOC_Os11g33240.3	Os11g0538900,Os11g0538900,Os11g0538900	4350660	LOC4350660	PF00285	Q2R339	citrate synthase, putative, expressed	-	osa:4350660	K01647	osa01200; osa01210; osa01100; osa00020; osa00630; osa01110; osa01230; osa01130	osa01100 [Pathway Title: Metabolic pathways]; osa01200 [Pathway Title: Carbon metabolism]; osa01230 [Pathway Title: Biosynthesis of amino acids]; osa01130 [Pathway Title: Biosynthesis of antibiotics]; osa00020 [Pathway Title: Citrate cycle (TCA cycle)]; osa00630 [Pathway Title: Glyoxylate and dicarboxylate metabolism]; osa01110 [Pathway Title: Biosynthesis of secondary metabolites]; osa01210 [Pat…	2-Oxocarboxylic acid metabolism; Metabolic pathways; Biosynthesis of amino acids; Glyoxylate and dicarboxylate metabolism; Biosynthesis of secondary metabolites; Carbon metabolism; Citrate cycle (TCA cycle); Biosynthesis of antibiotics	GO:0006099 [Name: tricarboxylic acid cycle]	GO:0005739 [Name: mitochondrion]	GO:0004108 [Name: citrate (Si)-synthase activity]	1701.39	1.358	0.0027	0.0004	Down				Os.3663.1.S1_at
Os.17890.1.S1_at	LOC_Os03g22120.1,LOC_Os03g22120.2,LOC_Os03g22120.3	Os03g0340500,Os03g0340500,Os03g0340500	4332788	LOC4332788	PF00862; PF00534	Q10LP5; K4FDV3	sucrose synthase, putative, expressed	-	osa:4332788	K00695	osa01100; osa00500	osa00500 [Pathway Title: Starch and sucrose metabolism]; osa01100 [Pathway Title: Metabolic pathways]	Starch and sucrose metabolism; Metabolic pathways	GO:0005985 [Name: sucrose metabolic process]; GO:0010555 [Name: response to mannitol]; GO:0009414 [Name: response to water deprivation]; GO:0005982 [Name: starch metabolic process]; GO:0010431 [Name: seed maturation]	-	GO:0016157 [Name: sucrose synthase activity]	1959.58	0.7382	0.0058	0.0013	up			Os.1460.3.S1_x_at	LOC_Os01g06460.1	Os01g0157900	4324087	LOC4324087	PF04749	Q9FYQ0; B8ADD1	uncharacterized Cys-rich domain containing protein, putative, expressed	-	osa:4324087	-	-	-	-	-	-	-	1701.79	0.6335	0.0027	0.0004	up				Os.38230.1.S1_at
Os.427.1.S1_at	LOC_Os07g28820.1	Os07g0471000	4343198	LOC4343198	PF06479; PF00069	Q9FS17; Q7XIT1	ribonuclease 2-5A family protein, expressed	-	osa:4343198	-	-	-	-	GO:0006986 [Name: response to unfolded protein]; GO:0008380 [Name: RNA splicing]; GO:0030968 [Name: endoplasmic reticulum unfolded protein response]; GO:0036498 [Name: IRE1-mediated unfolded protein response]; GO:0006397 [Name: mRNA processing]; GO:0034976 [Name: response to endoplasmic reticulum stress]; GO:0070059 [Name: intrinsic apoptotic signaling pathway in response to endoplasmic reticulum…	GO:0005789 [Name: endoplasmic reticulum membrane]; GO:0016021 [Name: integral component of membrane]; GO:1990604 [Name: IRE1-TRAF2-ASK1 complex]	GO:0004521 [Name: endoribonuclease activity]; GO:0004674 [Name: protein serine/threonine kinase activity]; GO:0005524 [Name: ATP binding]; GO:0004672 [Name: protein kinase activity]; GO:0051082 [Name: unfolded protein binding]	1959.04	0.7096	0.0058	0.0012	up			Os.18285.1.S1_at	LOC_Os01g67220.1,LOC_Os01g67220.2,LOC_Os01g67220.3	Os01g0897600,Os01g0897600,Os01g0897600	4325106	LOC4325106	PF00232	Q5N863; Q0JGX5	Os1bglu4 - beta-glucosidase-like protein without signal sequence, expressed	-	osa:4325106	-	-	-	-	GO:0009866 [Name: induced systemic resistance, ethylene mediated signaling pathway]; GO:0019748 [Name: secondary metabolic process]; GO:1990641 [Name: response to iron ion starvation]; GO:0071281 [Name: cellular response to iron ion]; GO:0030245 [Name: cellulose catabolic process]; GO:0071732 [Name: cellular response to nitric oxide]; GO:0005975 [Name: carbohydrate metabolic process]	GO:0005829 [Name: cytosol]	GO:0008422 [Name: beta-glucosidase activity]; GO:0102483 [Name: scopolin beta-glucosidase activity]; GO:0004553 [Name: hydrolase activity, hydrolyzing O-glycosyl compounds]	1703.57	0.7283	0.0027	0.0004	up				Os.4264.1.S1_at
Os.5672.1.S1_at	LOC_Os03g22540.1	Os03g0346700	4332818	LOC4332818	PF08879	Q0DRY1	jmjC domain containing protein, expressed	-	osa:4332818	-	-	-	-	-	-	-	1958.93	0.8179	0.0058	0.0012	up			Os.10673.1.S1_at	LOC_Os12g05650.1	Os12g0152700	4351525	LOC4351525	-	Q2QXL3	ACT domain containing protein, expressed	-	osa:4351525	-	-	-	-	-	GO:0009570 [Name: chloroplast stroma]; GO:0009507 [Name: chloroplast]; GO:0009535 [Name: chloroplast thylakoid membrane]	-	1700.72	0.6971	0.0026	0.0004	up				Os.4837.1.S1_at
Os.9587.1.S1_a_at	LOC_Os09g33500.1,LOC_Os09g33500.2	Os09g0509200,Os09g0509200	4347531	LOC4347531	PF02779; PF02780	Q0J0H4; B7E707	transketolase, putative, expressed	-	osa:4347531	K00162	osa00010; osa01130; osa01200; osa01100; osa01110; osa00020; osa00620	osa00620 [Pathway Title: Pyruvate metabolism]; osa01130 [Pathway Title: Biosynthesis of antibiotics]; osa01200 [Pathway Title: Carbon metabolism]; osa01100 [Pathway Title: Metabolic pathways]; osa00010 [Pathway Title: Glycolysis / Gluconeogenesis]; osa00020 [Pathway Title: Citrate cycle (TCA cycle)]; osa01110 [Pathway Title: Biosynthesis of secondary metabolites]	Carbon metabolism; Pyruvate metabolism; Metabolic pathways; Citrate cycle (TCA cycle); Biosynthesis of antibiotics; Glycolysis / Gluconeogenesis; Biosynthesis of secondary metabolites	GO:0006086 [Name: acetyl-CoA biosynthetic process from pyruvate]; GO:0006096 [Name: glycolytic process]	GO:0005759 [Name: mitochondrial matrix]	GO:0004739 [Name: pyruvate dehydrogenase (acetyl-transferring) activity]	1972.41	1.1718	0.0058	0.0014	Down			Os.11994.1.S1_at	LOC_Os07g41330.1	Os07g0604500	4343846	LOC4343846	PF02466	Q6Z4G6	mitochondrial import inner membrane translocase subunit Tim17, putative, expressed	-	osa:4343846	K17795	-	-	-	GO:0030150 [Name: protein import into mitochondrial matrix]	GO:0005744 [Name: mitochondrial inner membrane presequence translocase complex]; GO:0031305 [Name: integral component of mitochondrial inner membrane]	-	1699.16	0.6621	0.0026	0.0003	up				Os.6248.1.S1_s_at
Os.21387.2.S1_s_at	LOC_Os01g46169.1,LOC_Os01g46169.2,LOC_Os01g46140.1	Os01g0650200,Os01g0650200,Os01g0650100	4326256	LOC4326256	PF00657	Q5VP20; Q5VP19	GDSL-like lipase/acylhydrolase, putative, expressed	-	osa:4326256	-	-	-	-	-	-	-	1957.4	0.6768	0.0057	0.0012	up			Os.12680.1.S1_at	LOC_Os05g43840.1	Os05g0514200	4339306	LOC4339306	PF00069; PF03822	B7EGG2; Q68Y49	CAMK_KIN1/SNF1/Nim1_like.25 - CAMK includes calcium/calmodulin depedent protein kinases, expressed	-	osa:4339306	-	-	-	-	GO:0007165 [Name: signal transduction]	-	GO:0005524 [Name: ATP binding]; GO:0004674 [Name: protein serine/threonine kinase activity]	1699.35	0.701	0.0026	0.0003	up				Os.6786.1.S1_a_at
Os.24663.1.S1_s_at	LOC_Os02g51480.1	Os02g0750400	4330740	LOC4330740	PF13041; PF01535	Q6Z8K6	PPR repeat domain containing protein, putative, expressed	-	osa:4330740	-	-	-	-	GO:0008380 [Name: RNA splicing]; GO:0006417 [Name: regulation of translation]; GO:0006397 [Name: mRNA processing]	GO:0009507 [Name: chloroplast]	-	1971.15	1.255	0.0057	0.0014	Down			Os.15093.1.S1_at	LOC_Os02g13640.1	Os02g0230100	4328803	LOC4328803	PF14580	Q6H527	protein phosphatase 1 regulatory subunit SDS22, putative, expressed	-	osa:4328803	K17550	-	-	-	GO:0045842 [Name: positive regulation of mitotic metaphase/anaphase transition]	GO:0072357 [Name: PTW/PP1 phosphatase complex]; GO:0005737 [Name: cytoplasm]; GO:0005634 [Name: nucleus]	GO:0019888 [Name: protein phosphatase regulator activity]	1699.76	0.7046	0.0026	0.0004	up				Os.6821.1.S1_at
Os.27738.1.S1_at	LOC_Os07g05620.1,LOC_Os07g05620.2	Os07g0150700,Os07g0150700	4342410	LOC4342410	PF03822; PF00069	Q6ZLP5; B3GM05	CAMK_KIN1/SNF1/Nim1_like.28 - CAMK includes calcium/calmodulin depedent protein kinases, expressed	-	osa:4342410	-	-	-	-	GO:0010118 [Name: stomatal movement]; GO:0035556 [Name: intracellular signal transduction]; GO:0007584 [Name: response to nutrient]; GO:1990573 [Name: potassium ion import across plasma membrane]; GO:0009414 [Name: response to water deprivation]; GO:0006468 [Name: protein phosphorylation]; GO:0007165 [Name: signal transduction]	GO:0005737 [Name: cytoplasm]; GO:0009536 [Name: plastid]; GO:0005829 [Name: cytosol]; GO:0005886 [Name: plasma membrane]; GO:0005634 [Name: nucleus]	GO:0005524 [Name: ATP binding]; GO:0004674 [Name: protein serine/threonine kinase activity]	1957.32	0.8574	0.0057	0.0012	up			Os.24652.1.S1_at	LOC_Os08g36980.1,LOC_Os08g36980.2	Os08g0474600,Os08g0474600	4345818	LOC4345818	PF00226; PF05207	Q0J522	AGAP010609-PA, putative, expressed	-	osa:4345818	K17867	-	-	-	GO:0002098 [Name: tRNA wobble uridine modification]; GO:0017183 [Name: peptidyl-diphthamide biosynthetic process from peptidyl-histidine]	GO:0005829 [Name: cytosol]; GO:0005634 [Name: nucleus]	GO:0046872 [Name: metal ion binding]	1701.1	0.6841	0.0026	0.0004	up				Os.7075.1.S1_at
Os.4600.1.S1_at	LOC_Os06g33710.1,LOC_Os06g33710.2,LOC_Os06g33710.3,LOC_Os06g33710.4	Os06g0528600,Os06g0528600,Os06g0528600,Os06g0528600	4341195	LOC4341195	PF17284	Q9SMB0; Q7XAP2	spermidine synthase, putative, expressed	-	osa:4341195	K00797	osa01100; osa00480; osa00270; osa00410; osa00330	osa01100 [Pathway Title: Metabolic pathways]; osa00480 [Pathway Title: Glutathione metabolism]; osa00270 [Pathway Title: Cysteine and methionine metabolism]; osa00330 [Pathway Title: Arginine and proline metabolism]; osa00410 [Pathway Title: beta-Alanine metabolism]	Metabolic pathways; Glutathione metabolism; Cysteine and methionine metabolism; beta-Alanine metabolism; Arginine and proline metabolism	GO:0006596 [Name: polyamine biosynthetic process]	-	GO:0016740 [Name: transferase activity]; GO:0004766 [Name: spermidine synthase activity]	1956.8	0.7886	0.0057	0.0012	up			Os.49189.1.S1_at	LOC_Os11g29340.1	Os11g0483600	4350522	LOC4350522	PF02037; PF10172	Q2R486	SAP domain containing protein, expressed	-	osa:4350522	-	-	-	-	GO:0032434 [Name: regulation of proteasomal ubiquitin-dependent protein catabolic process]	-	-	1700.78	0.6563	0.0026	0.0004	up				Os.7272.1.S1_at
Os.6073.1.S1_at	LOC_Os03g38590.1,LOC_Os03g38590.2	Os03g0582200,Os03g0582200	4333331	LOC4333331	PF04144	Q75IC7; B9F9F7	secretory carrier-associated membrane protein 4, putative, expressed	-	osa:4333331	-	-	-	-	GO:0015031 [Name: protein transport]	GO:0032588 [Name: trans-Golgi network membrane]; GO:0005886 [Name: plasma membrane]; GO:0005794 [Name: Golgi apparatus]; GO:0016021 [Name: integral component of membrane]; GO:0000139 [Name: Golgi membrane]; GO:0030658 [Name: transport vesicle membrane]; GO:0055038 [Name: recycling endosome membrane]	-	1971.53	1.2857	0.0057	0.0014	Down			Os.9149.1.S1_at	LOC_Os06g45310.1	Os06g0663500	9267653	-	PF03110	C7J498	OsSPL11 - SBP-box gene family member, expressed	SBP	osa:9267653	-	-	-	-	-	GO:0005634 [Name: nucleus]	GO:0046872 [Name: metal ion binding]; GO:0003677 [Name: DNA binding]	1699.42	1.3981	0.0026	0.0004	Down				Os.7947.1.S1_a_at
Os.8273.1.S1_s_at	LOC_Os07g42450.1	Os07g0616600	4343909	LOC4343909	PF00318; PF16122; PF12776	Q8H3I3; Q7XUS3	ribosomal protein S2, putative, expressed	-	osa:4343909; osa:4336077	K02998	osa03010	osa03010 [Pathway Title: Ribosome]	Ribosome	GO:0000461 [Name: endonucleolytic cleavage to generate mature 3'-end of SSU-rRNA from (SSU-rRNA, 5.8S rRNA, LSU-rRNA)]; GO:0000447 [Name: endonucleolytic cleavage in ITS1 to separate SSU-rRNA from 5.8S rRNA and LSU-rRNA from tricistronic rRNA transcript (SSU-rRNA, 5.8S rRNA, LSU-rRNA)]; GO:0000028 [Name: ribosomal small subunit assembly]; GO:0006412 [Name: translation]; GO:0006407 [Name: rRNA exp…	GO:0022627 [Name: cytosolic small ribosomal subunit]	GO:0003735 [Name: structural constituent of ribosome]	1971.71	1.2551	0.0057	0.0014	Down			Os.11710.1.S1_at	LOC_Os01g12730.1,LOC_Os01g12730.2	Os01g0227300,Os01g0227300	4327180	LOC4327180	PF00071	Q5N7Z9	ras-related protein, putative, expressed	-	osa:4327180	K07897	osa04144; osa04145	osa04144 [Pathway Title: Endocytosis]; osa04145 [Pathway Title: Phagosome]	Endocytosis; Phagosome	GO:0032482 [Name: Rab protein signal transduction]; GO:0006886 [Name: intracellular protein transport]	GO:0005774 [Name: vacuolar membrane]	GO:0005525 [Name: GTP binding]; GO:0003924 [Name: GTPase activity]	1698.81	1.2762	0.0025	0.0004	Down				Os.8574.1.S1_at
Os.15717.1.S1_at	LOC_Os08g45210.1,LOC_Os08g45210.2	Os08g0566900,Os08g0566900	4346360	LOC4346360	PF04117	Q6Z1N7	Mpv17 / PMP22 family domain containing protein, expressed	-	osa:4346360	K13348	osa04146	osa04146 [Pathway Title: Peroxisome]	Peroxisome	-	GO:0005737 [Name: cytoplasm]; GO:0016021 [Name: integral component of membrane]	-	1969.55	1.3054	0.0056	0.0013	Down			Os.12732.1.S1_a_at	LOC_Os10g42320.1	Os10g0573900	4349477	LOC4349477	PF04981	Q336P7	nonsense-mediated mRNA decay protein 3, putative, expressed	-	osa:4349477	K07562	osa03008; osa03013	osa03013 [Pathway Title: RNA transport]; osa03008 [Pathway Title: Ribosome biogenesis in eukaryotes]	Ribosome biogenesis in eukaryotes; RNA transport	GO:0007029 [Name: endoplasmic reticulum organization]; GO:0009834 [Name: plant-type secondary cell wall biogenesis]; GO:0000055 [Name: ribosomal large subunit export from nucleus]	GO:0005634 [Name: nucleus]; GO:0005737 [Name: cytoplasm]; GO:0005829 [Name: cytosol]	GO:0043023 [Name: ribosomal large subunit binding]	1695.55	1.3002	0.0025	0.0004	Down				Os.8809.1.S1_s_at
Os.8910.1.S1_at	LOC_Os02g37830.1,LOC_Os02g37830.2	Os02g0590800,Os02g0590800	4329828	LOC4329828	PF00069	Q6YY75	protein kinase domain containing protein, expressed	-	osa:4329828	-	-	-	-	-	GO:0005737 [Name: cytoplasm]	GO:0004674 [Name: protein serine/threonine kinase activity]; GO:0005524 [Name: ATP binding]	1956.1	0.9441	0.0056	0.0012	up			Os.12948.1.S1_at	LOC_Os02g08420.1	Os02g0180700	4328509	LOC4328509	PF01370	Q6H817	cinnamoyl CoA reductase, putative, expressed	-	osa:4328509	-	-	-	-	-	-	GO:0050662 [Name: coenzyme binding]; GO:0016616 [Name: oxidoreductase activity, acting on the CH-OH group of donors, NAD or NADP as acceptor]; GO:0016491 [Name: oxidoreductase activity]	1695.78	0.9826	0.0025	0.0004	Down				Os.9021.2.S1_at
Os.27906.1.S1_a_at	LOC_Os01g62760.1,LOC_Os03g16170.2,LOC_Os03g16170.1	Os01g0846300,Os03g0268600,Os03g0268600	4327465	LOC4327465	PF00481	Q2VC76; Q5N9N2; B9EUE1	protein phosphatase 2C, putative, expressed	-	osa:4327465	K14497	osa04075; osa04931	osa04075 [Pathway Title: Plant hormone signal transduction]; osa04931 [Pathway Title: Insulin resistance]	Plant hormone signal transduction; Insulin resistance	-	GO:0016021 [Name: integral component of membrane]; GO:0005829 [Name: cytosol]; GO:0005634 [Name: nucleus]	GO:0004724 [Name: magnesium-dependent protein serine/threonine phosphatase activity]; GO:0046872 [Name: metal ion binding]; GO:0004722 [Name: protein serine/threonine phosphatase activity]	1967.83	1.4399	0.0055	0.0013	Down			Os.19325.1.S1_at	LOC_Os09g11520.1	Os09g0287500	4346632	LOC4346632	PF04483	Q6EN61	DUF565 domain containing protein, putative, expressed	-	osa:4346632	-	-	-	-	-	GO:0016021 [Name: integral component of membrane]	-	1698.04	1.2847	0.0025	0.0004	Down				OsAffx.22754.1.S1_s_at
Os.6684.1.S1_at	LOC_Os02g03440.1	Os02g0126700	4328158	LOC4328158	PF01423	Q6Z2M5	LSM domain containing protein, expressed	-	osa:4328158	K11097	osa03040	osa03040 [Pathway Title: Spliceosome]	Spliceosome	GO:0000387 [Name: spliceosomal snRNP assembly]	GO:0005685 [Name: U1 snRNP]; GO:0046540 [Name: U4/U6 x U5 tri-snRNP complex]; GO:0005682 [Name: U5 snRNP]; GO:0005686 [Name: U2 snRNP]; GO:0005687 [Name: U4 snRNP]; GO:0005681 [Name: spliceosomal complex]; GO:0019013 [Name: viral nucleocapsid]	GO:0003723 [Name: RNA binding]	1967.19	1.147	0.0055	0.0013	Down			Os.3114.1.S1_at	LOC_Os10g33970.1,LOC_Os10g33970.2	Os10g0480500,Os10g0480500	4348920	LOC4348920	PF00035	Q9AV50	double-stranded RNA binding motif containing protein, expressed	-	osa:4348920	-	-	-	-	GO:0070919 [Name: production of siRNA involved in chromatin silencing by small RNA]; GO:0035196 [Name: production of miRNAs involved in gene silencing by miRNA]	GO:0005737 [Name: cytoplasm]	GO:0003725 [Name: double-stranded RNA binding]	1695.63	1.3936	0.0025	0.0004	Down				OsAffx.26384.4.S1_at
OsAffx.28932.1.S1_at	LOC_Os07g46520.1	Os07g0659400	4344169	LOC4344169	PF13419	Q8GRS0; Q4F886	rhythmically expressed gene 2 protein, putative, expressed	-	osa:4344169	-	-	-	-	-	-	GO:0016787 [Name: hydrolase activity]	1967.55	1.4072	0.0055	0.0013	Down			Os.3917.2.S1_x_at	LOC_Os01g11414.1,LOC_Os01g11414.2	Os01g0212400,Os01g0212400	4325568	LOC4325568	PF01699	Q5QNI2	sodium/calcium exchanger protein, putative, expressed	-	osa:4325568	-	-	-	-	GO:0006814 [Name: sodium ion transport]; GO:0006874 [Name: cellular calcium ion homeostasis]; GO:0070588 [Name: calcium ion transmembrane transport]	GO:0005886 [Name: plasma membrane]; GO:0016021 [Name: integral component of membrane]	GO:0005509 [Name: calcium ion binding]; GO:0015369 [Name: calcium:proton antiporter activity]	1696.72	0.7583	0.0025	0.0003	up				OsAffx.32196.1.S1_x_at
Os.15338.1.S1_a_at	LOC_Os01g34060.1	Os01g0524500	4323963	LOC4323963	PF00249	Q8LH59; Q0JM93	MYB family transcription factor, putative, expressed	Dof	osa:4323963	-	-	-	-	GO:0009739 [Name: response to gibberellin]; GO:0045893 [Name: positive regulation of transcription, DNA-templated]; GO:0009744 [Name: response to sucrose]; GO:0009751 [Name: response to salicylic acid]	GO:0005634 [Name: nucleus]; GO:0005737 [Name: cytoplasm]	GO:0003677 [Name: DNA binding]; GO:0003700 [Name: transcription factor activity, sequence-specific DNA binding]; GO:0042803 [Name: protein homodimerization activity]	1964.61	1.417	0.0053	0.0013	Down			Os.49864.1.S1_s_at	LOC_Os03g63470.1	Os03g0851600	4334804	LOC4334804	-	Q0DLQ8	retrotransposon protein, putative, unclassified, expressed	-	osa:4334804	-	-	-	-	GO:0032008 [Name: positive regulation of TOR signaling]	-	-	1697.28	0.7299	0.0025	0.0003	up				OsAffx.32335.1.S1_x_at
Os.21762.2.S1_x_at	LOC_Os03g51600.1,LOC_Os03g51600.2	Os03g0726100,Os03g0726100	4350197	LOC4350197	PF03953; PF00091	A2ZD27; Q0ITK1; Q53M52; Q8GTC8; A6N1N0; Q0PVB1; Q8GTC6; A6N004; A6MZF8	tubulin/FtsZ domain containing protein, putative, expressed	-	osa:4350197	K07374	osa04145	osa04145 [Pathway Title: Phagosome]	Phagosome	GO:0007017 [Name: microtubule-based process]; GO:0000278 [Name: mitotic cell cycle]; GO:0000226 [Name: microtubule cytoskeleton organization]	GO:0005874 [Name: microtubule]; GO:0005737 [Name: cytoplasm]	GO:0005200 [Name: structural constituent of cytoskeleton]; GO:0005525 [Name: GTP binding]; GO:0003924 [Name: GTPase activity]	1951.74	0.8415	0.0053	0.0011	up			Os.11767.1.S1_s_at	LOC_Os04g47240.1,LOC_Os04g47240.2,LOC_Os04g47240.3	Os04g0559800,Os04g0559800,Os04g0559800	4336647	LOC4336647	PF00069	Q7XUR1	STE_MEKK_ste11_MAP3K.17 - STE kinases include homologs to sterile 7, sterile 11 and sterile 20 from yeast, expressed	-	osa:4336647	-	-	-	-	GO:0023014 [Name: signal transduction by protein phosphorylation]; GO:0031098 [Name: stress-activated protein kinase signaling cascade]; GO:0032147 [Name: activation of protein kinase activity]	GO:0005737 [Name: cytoplasm]	GO:0004674 [Name: protein serine/threonine kinase activity]; GO:0005524 [Name: ATP binding]	1692.83	1.3315	0.0024	0.0003	Down				Os.3373.1.S1_at
Os.26535.1.S1_x_at	LOC_Os04g16830.1	None	9266573	rpoC2	PF04998; PF05000	B8AP84; C7J1G9; J3RPY0	DNA-directed RNA polymerase subunit beta, putative, expressed	-	osa:9266573	K03046	osa00240; osa01100; osa03020; osa00230	osa01100 [Pathway Title: Metabolic pathways]; osa00240 [Pathway Title: Pyrimidine metabolism]; osa00230 [Pathway Title: Purine metabolism]; osa03020 [Pathway Title: RNA polymerase]	Purine metabolism; RNA polymerase; Pyrimidine metabolism; Metabolic pathways	GO:0006351 [Name: transcription, DNA-templated]	GO:0009507 [Name: chloroplast]	GO:0003677 [Name: DNA binding]; GO:0003899 [Name: DNA-directed 5'-3' RNA polymerase activity]	1950.78	0.7304	0.0053	0.0011	up			Os.11889.1.S2_at	LOC_Os02g39010.1,LOC_Os02g39010.2,LOC_Os02g39010.3	Os02g0602100,Os02g0602100,Os02g0602100	4329899	LOC4329899	PF00069	B7F3X5; Q6K5F8	cyclin-dependent kinase G-1, putative, expressed	-	osa:4329899	K08818	-	-	-	GO:0006468 [Name: protein phosphorylation]	GO:0005634 [Name: nucleus]	GO:0005524 [Name: ATP binding]; GO:0008353 [Name: RNA polymerase II carboxy-terminal domain kinase activity]; GO:0004693 [Name: cyclin-dependent protein serine/threonine kinase activity]	1691.77	0.6787	0.0024	0.0003	up				Os.23087.1.S1_at
[truncated: 2,842 more rows]
[truncated: 21 more columns]
