# Supplementary material for: Abiotic Stress-Responsive miRNA and Transcription Factor-Mediated Gene Regulatory Network in Oryza sativa: Construction and Structural Measure Study
Source: Front Genet. 2021 Feb 12;12:618089. doi: 10.3389/fgene.2021.618089 (PMC7907651; doi:10.3389/fgene.2021.618089)
Supplement: Supplementary Table 8 — List of miRNAs targets validated by degradome sequencing data analysis results. [file Table_8.XLSX]

## Sheet: Sheet1
Supplementary Table S8|Degradome sequencing data-based validation of the targets of the miRNA expressed in abiotic stress of Oryza sativa.
Query	Transcript	DegradomeCategory
osa-miR166l-5p	OS01T0300200-02	4
osa-miR166l-5p	OS01T0300200-01	4
osa-miR396c-5p	OS01T0505500-00	4
osa-miR396a-5p	OS01T0505500-00	4
osa-miR2876-5p	OS01T0616100-02	4
osa-miR2876-5p	OS01T0616100-01	4
osa-miR396a-5p	OS01T0633200-02	1
osa-miR396b-5p	OS01T0633200-01	2
osa-miR167c-3p	OS01T0662600-01	4
osa-miR167c-3p	OS01T0662600-04	4
osa-miR167c-3p	OS01T0662600-02	4
osa-miR167c-3p	OS01T0662600-05	4
osa-miR319b	OS01T0812000-03	4
osa-miR319b	OS01T0812000-02	2
osa-miR319b	OS01T0812000-01	2
osa-miR159f	OS01T0812000-01	0
osa-miR159f	OS01T0812000-02	0
osa-miR159f	OS01T0812000-03	0
osa-miR156g-5p	OS02T0139400-01	0
osa-miR156c-5p	OS02T0139400-01	0
osa-miR167a-5p	OS02T0164900-02	0
osa-miR167b	OS02T0164900-01	0
osa-miR167c-5p	OS02T0164900-02	0
osa-miR156j-5p	OS02T0174100-02	2
osa-miR156c-5p	OS02T0174100-01	2
osa-miR156f-5p	OS02T0174100-02	2
osa-miR156g-5p	OS02T0174100-01	2
osa-miR394	OS02T0186500-01	4
osa-miR394	OS02T0186500-02	4
osa-miR399i	OS02T0234300-01	4
osa-miR166k-5p	OS02T0234300-01	2
osa-miR396a-5p	OS02T0701300-01	0
osa-miR396b-5p	OS02T0701300-01	0
osa-miR166c-3p	OS03T0164901-00	2
osa-miR166b-3p	OS03T0164901-00	4
osa-miR530-3p	OS03T0206400-02	4
osa-miR530-3p	OS03T0206400-01	4
osa-miR164e	OS03T0278000-01	2
osa-miR164e	OS03T0278000-02	2
osa-miR169g	OS03T0411100-01	0
osa-miR169g	OS03T0411100-02	0
osa-miR166g-5p	OS03T0583900-04	4
osa-miR166g-5p	OS03T0583900-01	4
osa-miR396a-5p	OS03T0674700-01	0
osa-miR396b-5p	OS03T0674700-01	0
osa-miR169g	OS03T0696300-01	0
osa-miR169g	OS03T0696300-02	0
osa-miR530-5p	OS03T0738400-03	3
osa-miR530-5p	OS03T0738400-01	3
osa-miR393a	OS04T0395600-02	0
osa-miR393b-5p	OS04T0395600-02	0
osa-miR393a	OS04T0395600-03	2
osa-miR393b-5p	OS04T0395600-01	2
osa-miR399d	OS04T0415000-01	2
osa-miR399j	OS04T0415000-01	4
osa-miR164e	OS04T0460600-01	4
osa-miR164e	OS04T0460600-02	4
osa-miR160f-5p	OS04T0519700-01	1
osa-miR160c-5p	OS04T0519700-01	0
osa-miR7695-3p	OS04T0563350-01	4
osa-miR7695-5p	OS04T0563350-01	4
osa-miR319b	OS04T0659900-01	4
osa-miR319b	OS04T0659900-02	4
osa-miR167a-5p	OS04T0671900-02	2
osa-miR396c-5p	OS04T0671900-03	4
osa-miR167a-5p	OS04T0671900-01	2
osa-miR167b	OS04T0671900-02	2
osa-miR167b	OS04T0671900-03	2
osa-miR167c-5p	OS04T0671900-01	2
osa-miR393b-5p	OS04T0684100-02	4
osa-miR393b-3p	OS04T0684100-01	4
osa-miR393b-3p	OS04T0684100-02	2
osa-miR393a	OS04T0684100-02	4
osa-miR393b-5p	OS04T0684100-01	4
osa-miR2871a-5p	OS04T0693000-01	4
osa-miR166l-5p	OS04T0693000-02	4
osa-miR166l-5p	OS04T0693000-01	4
osa-miR2871a-5p	OS04T0693000-02	4
osa-miR166e-3p	OS05T0132100-03	4
osa-miR166e-3p	OS05T0132100-02	2
osa-miR2876-3p	OS05T0143500-02	2
osa-miR2876-3p	OS05T0143500-03	2
osa-miR2876-3p	OS05T0143500-01	4
osa-miR393a	OS05T0150500-00	0
osa-miR393b-5p	OS05T0150500-00	0
osa-miR1862a	OS05T0494500-01	4
osa-miR1862c	OS05T0494500-01	4
osa-miR1863b	OS05T0567100-03	4
osa-miR528-5p	OS05T0567100-01	4
osa-miR167b	OS06T0129100-01	0
osa-miR167a-5p	OS06T0129100-01	0
osa-miR5144-3p	OS06T0196900-02	4
osa-miR5144-3p	OS06T0196900-03	4
osa-miR167a-3p	OS06T0530200-01	4
osa-miR167a-3p	OS06T0530200-02	4
osa-miR5144-3p	OS06T0669400-01	4
osa-miR5144-3p	OS06T0669400-03	4
osa-miR167a-5p	OS06T0677800-01	2
osa-miR167c-5p	OS06T0677800-01	2
osa-miR160b-5p	OS06T0685700-01	0
osa-miR160d-5p	OS06T0685700-01	0
osa-miR156g-5p	OS06T0703500-01	2
osa-miR156g-5p	OS06T0703500-02	2
osa-miR156j-5p	OS06T0703500-03	2
osa-miR1873	OS06T0727200-01	3
osa-miR1873	OS06T0727200-02	4
osa-miR5144-5p	OS07T0418000-02	4
osa-miR5144-5p	OS07T0418000-01	4
osa-miR167c-5p	OS07T0481400-01	0
osa-miR167a-5p	OS07T0481400-01	0
osa-miR167b	OS07T0522600-02	0
osa-miR167a-5p	OS07T0522600-02	0
osa-miR529a	OS07T0553900-01	2
osa-miR530-5p	OS07T0553900-01	4
osa-miR396c-5p	OS07T0657200-04	4
osa-miR396c-5p	OS07T0657200-03	2
osa-miR528-5p	OS08T0137400-01	2
osa-miR528-5p	OS08T0137400-02	2
osa-miR393b-3p	OS08T0198700-02	4
osa-miR396c-3p	OS08T0198700-01	4
osa-miR396c-3p	OS08T0198700-02	4
osa-miR393b-3p	OS08T0198700-01	2
osa-miR164e	OS08T0200600-01	0
osa-miR164e	OS08T0200600-02	0
osa-miR396c-5p	OS08T0398400-01	4
osa-miR396a-5p	OS08T0398400-01	4
osa-miR1860-3p	OS08T0464000-01	4
osa-miR1860-3p	OS08T0464000-02	4
osa-miR2878-3p	OS08T0464000-02	4
osa-miR396b-3p	OS09T0505600-01	4
osa-miR396a-3p	OS09T0505600-01	2
osa-miR166k-3p	OS09T0525400-01	4
osa-miR166e-3p	OS09T0525400-01	4
osa-miR166l-3p	OS09T0525400-01	2
osa-miR167a-5p	OS09T0547300-01	4
osa-miR167c-5p	OS09T0547300-01	4
osa-miR167c-5p	OS09T0547300-02	4
osa-miR396c-5p	OS09T0565200-02	4
osa-miR399j	OS09T0565200-02	2
osa-miR160a-5p	OS10T0479900-01	0
osa-miR160d-5p	OS10T0479900-01	0
osa-miR166g-3p	OS10T0480200-01	0
osa-miR166l-3p	OS10T0480200-02	0
osa-miR5144-3p	OS11T0199200-02	2
osa-miR5144-3p	OS11T0199200-01	4
osa-miR396b-5p	OS11T0551900-01	0
osa-miR396c-5p	OS11T0551900-01	0
osa-miR396b-5p	OS12T0484900-01	0
osa-miR396a-5p	OS12T0484900-01	0
osa-miR166g-3p	OS12T0612700-01	0
osa-miR166l-3p	OS12T0612700-01	0
osa-miR167b	OS12T0613700-02	2
osa-miR167a-5p	OS12T0613700-01	1
osa-miR167a-5p	OS12T0613700-02	0
osa-miR167c-5p	OS12T0613700-01	0
osa-miR1863b.2	OS12T0636200-01	2
osa-miR1863b.2	OS12T0636200-03	4
osa-miR530-5p	OS01T0102800-01	4
osa-miR159f	OS01T0118100-01	4
osa-miR167a-3p	OS01T0120500-01	4
osa-miR156c-5p	OS01T0135700-01	4
osa-miR156c-3p	OS01T0142500-01	4
osa-miR166e-5p	OS01T0148700-01	4
osa-miR820c	OS01T0151200-01	2
osa-miR156j-3p	OS01T0151700-01	4
osa-miR394	OS01T0171000-02	4
osa-miR440	OS01T0177900-02	4
osa-miR528-3p	OS01T0186700-01	4
osa-miR1431	OS01T0188900-01	4
osa-miR1860-3p	OS01T0193600-01	4
osa-miR159f	OS01T0212500-01	4
osa-miR529a	OS01T0263600-01	4
osa-miR530-5p	OS01T0267100-01	4
osa-miR2871a-5p	OS01T0268800-02	4
osa-miR1871	OS01T0271500-01	4
osa-miR530-5p	OS01T0309900-01	4
osa-miR820a	OS01T0327000-01	4
osa-miR394	OS01T0328700-01	2
osa-miR166h-5p	OS01T0347600-01	4
osa-miR529a	OS01T0362100-01	4
osa-miR393a	OS01T0364800-00	4
osa-miR396c-5p	OS01T0496900-01	4
osa-miR1862b	OS01T0500500-01	4
osa-miR159f	OS01T0507000-02	4
osa-miR166l-5p	OS01T0531500-02	4
osa-miR2871a-3p	OS01T0547000-01	4
osa-miR1860-3p	OS01T0588500-01	4
osa-miR1871	OS01T0591300-02	4
osa-miR1863b.2	OS01T0610100-01	2
osa-miR169a	OS01T0624500-01	3
osa-miR1432-3p	OS01T0655400-01	4
osa-miR156l-5p	OS01T0700100-01	4
osa-miR396c-5p	OS01T0725800-01	2
osa-miR393a	OS01T0734100-01	4
osa-miR166c-5p	OS01T0744300-01	4
osa-miR167a-5p	OS01T0749400-02	4
osa-miR5156	OS01T0777101-00	4
osa-miR166g-5p	OS01T0814900-01	4
osa-miR529a	OS01T0840700-00	4
osa-miR2876-3p	OS01T0917400-02	4
osa-miR156l-5p	OS01T0922600-01	0
osa-miR394	OS01T0923900-01	0
osa-miR166c-5p	OS01T0926300-01	2
osa-miR1882e-5p	OS01T0927600-01	2
osa-miR5144-5p	OS01T0943000-01	4
osa-miR166c-5p	OS01T0958800-02	4
osa-miR2871a-3p	OS01T0958900-02	4
osa-miR396c-5p	OS01T0968700-02	4
osa-miR393b-3p	OS02T0101000-01	4
osa-miR166e-3p	OS02T0103800-01	4
osa-miR394	OS02T0105500-01	4
osa-miR159f	OS02T0106100-01	4
osa-miR529a	OS02T0139100-01	4
osa-miR393b-3p	OS02T0149800-01	4
osa-miR166l-3p	OS02T0153900-01	4
osa-miR5144-3p	OS02T0174200-01	4
osa-miR166h-5p	OS02T0176100-02	2
osa-miR5144-3p	OS02T0180000-01	4
osa-miR2118d	OS02T0181800-01	4
osa-miR812q	OS02T0182900-01	4
osa-miR156j-3p	OS02T0192400-02	4
osa-miR399j	OS02T0216300-07	2
osa-miR396a-3p	OS02T0226000-01	4
osa-miR1866-3p	OS02T0232900-01	4
osa-miR394	OS02T0244600-01	2
osa-miR1423-3p	OS02T0252200-01	4
osa-miR160c-3p	OS02T0274900-03	4
osa-miR396c-5p	OS02T0288000-01	4
osa-miR160b-3p	OS02T0303500-01	4
osa-miR5788	OS02T0325100-01	4
osa-miR530-5p	OS02T0438200-01	2
osa-miR1432-3p	OS02T0469600-01	2
osa-miR156f-3p	OS02T0517531-01	4
osa-miR812j	OS02T0526650-01	4
osa-miR396c-5p	OS02T0535700-01	4
osa-miR167a-3p	OS02T0554100-01	4
osa-miR164e	OS02T0557300-01	4
osa-miR166l-5p	OS02T0557700-01	2
osa-miR396c-3p	OS02T0574900-01	4
osa-miR164e	OS02T0579000-01	4
osa-miR164e	OS02T0589400-01	4
osa-miR166k-5p	OS02T0600100-01	4
osa-miR2876-5p	OS02T0605900-01	4
osa-miR820b	OS02T0612800-01	4
osa-miR160b-5p	OS02T0628600-01	0
osa-miR530-5p	OS02T0633100-02	4
osa-miR530-3p	OS02T0662100-01	4
osa-miR164e	OS02T0666300-01	4
osa-miR396c-5p	OS02T0678800-01	0
osa-miR5156	OS02T0702600-03	4
osa-miR2874	OS02T0709400-01	4
osa-miR1871	OS02T0717400-01	4
osa-miR1863b.2	OS02T0723300-01	4
osa-miR166b-3p	OS02T0729300-01	3
osa-miR167a-3p	OS02T0759800-01	4
osa-miR528-5p	OS02T0768000-01	4
osa-miR169g	OS02T0776400-01	0
osa-miR394	OS02T0782500-01	4
osa-miR530-5p	OS02T0796600-01	4
osa-miR166c-5p	OS02T0820000-01	4
osa-miR166l-5p	OS02T0826600-01	4
osa-miR1423-3p	OS02T0830900-01	4
osa-miR530-3p	OS03T0103100-01	4
osa-miR530-3p	OS03T0103200-01	4
osa-miR166k-3p	OS03T0109400-02	0
osa-miR820c	OS03T0110800-01	2
osa-miR394	OS03T0147700-01	4
osa-miR529a	OS03T0159800-01	4
osa-miR5788	OS03T0170000-01	4
osa-miR2876-5p	OS03T0171600-03	4
osa-miR169g	OS03T0174900-01	0
osa-miR166h-5p	OS03T0200800-01	2
osa-miR1863b.2	OS03T0213800-01	4
osa-miR166c-3p	OS03T0216600-01	4
osa-miR156g-3p	OS03T0226400-01	1
osa-miR159f	OS03T0230500-01	4
osa-miR167c-3p	OS03T0243300-01	4
osa-miR820c	OS03T0248600-02	2
osa-miR156l-3p	OS03T0265400-02	4
osa-miR1883a	OS03T0294032-01	4
osa-miR5150-3p	OS03T0304800-01	4
osa-miR166h-3p	OS03T0305000-01	4
osa-miR396a-3p	OS03T0308100-03	4
osa-miR2871a-3p	OS03T0323800-01	4
osa-miR159f	OS03T0331700-02	4
osa-miR812q	OS03T0339900-01	4
osa-miR394	OS03T0340700-01	4
osa-miR1432-3p	OS03T0356414-01	4
osa-miR7695-5p	OS03T0365900-01	4
osa-miR166l-5p	OS03T0554900-00	4
osa-miR393a	OS03T0559700-00	2
osa-miR396b-5p	OS03T0569800-02	4
osa-miR393a	OS03T0626600-01	4
osa-miR1432-3p	OS03T0627500-01	4
osa-miR166k-3p	OS03T0640800-01	0
osa-miR169g	OS03T0647600-01	0
osa-miR393a	OS03T0683700-01	4
osa-miR159f	OS03T0683866-00	4
osa-miR160a-3p	OS03T0684400-01	4
osa-miR1863b.2	OS03T0690600-03	4
osa-miR1873	OS03T0708700-00	4
osa-miR393b-3p	OS03T0709000-01	4
osa-miR396b-5p	OS03T0729500-01	4
osa-miR1862c	OS03T0737701-00	4
osa-miR2876-5p	OS03T0737900-01	4
osa-miR166k-3p	OS03T0769400-01	4
osa-miR2878-3p	OS03T0773600-02	4
osa-miR156l-5p	OS03T0783700-00	4
osa-miR2876-5p	OS03T0786700-01	4
osa-miR166c-5p	OS03T0791800-01	3
osa-miR394	OS03T0802500-01	4
osa-miR1432-3p	OS03T0807400-01	4
osa-miR1846d-5p	OS03T0821100-01	2
osa-miR5144-5p	OS03T0821700-01	4
osa-miR166e-5p	OS03T0823100-01	4
osa-miR1873	OS03T0825300-02	4
osa-miR1860-5p	OS03T0850600-01	4
osa-miR166c-5p	OS03T0852900-01	4
osa-miR2871b	OS03T0861100-01	4
osa-miR5794	OS04T0102700-01	2
osa-miR1432-3p	OS04T0165700-01	4
osa-miR5144-5p	OS04T0169100-02	4
osa-miR5159	OS04T0249700-01	4
osa-miR166h-5p	OS04T0266400-01	4
osa-miR528-5p	OS04T0307200-02	4
osa-miR2118d	OS04T0372800-01	4
osa-miR396c-5p	OS04T0373000-00	4
osa-miR5794	OS04T0379500-01	4
osa-miR159f	OS04T0379600-01	4
osa-miR156l-3p	OS04T0408900-01	2
osa-miR167c-3p	OS04T0431700-01	4
osa-miR394	OS04T0457800-01	4
osa-miR160d-3p	OS04T0485800-01	4
osa-miR166c-5p	OS04T0514500-01	4
osa-miR1882e-3p	OS04T0531700-01	4
osa-miR2118d	OS04T0543900-02	2
osa-miR156g-5p	OS04T0551500-01	4
osa-miR166m	OS04T0571600-01	2
osa-miR396a-5p	OS04T0600900-01	2
osa-miR530-5p	OS04T0603200-01	4
osa-miR7695-3p	OS04T0606200-01	4
osa-miR396c-5p	OS04T0609900-00	4
osa-miR2876-5p	OS04T0629600-02	4
osa-miR396b-3p	OS04T0636100-01	4
osa-miR1860-5p	OS04T0645100-01	4
osa-miR2118d	OS04T0653000-01	3
osa-miR166e-3p	OS04T0669100-01	4
osa-miR167a-3p	OS04T0672200-01	4
osa-miR5159	OS04T0679900-01	4
osa-miR529a	OS04T0682100-01	4
osa-miR1873	OS05T0108400-01	4
osa-miR812j	OS05T0122800-03	4
osa-miR164e	OS05T0137400-01	2
osa-miR396a-3p	OS05T0144400-01	4
osa-miR396c-5p	OS05T0204900-01	1
osa-miR160c-3p	OS05T0220100-01	4
osa-miR1846d-5p	OS05T0287800-01	4
osa-miR396c-5p	OS05T0295300-01	4
osa-miR1860-3p	OS05T0302700-01	2
osa-miR166c-5p	OS05T0345500-03	1
osa-miR1860-5p	OS05T0353400-02	4
osa-miR156l-5p	OS05T0372800-01	4
osa-miR2876-5p	OS05T0390500-01	4
osa-miR166c-5p	OS05T0425000-00	4
osa-miR159f	OS05T0430300-01	4
osa-miR529a	OS05T0459900-01	2
osa-miR167a-3p	OS05T0462600-01	4
osa-miR160a-3p	OS05T0473000-01	4
osa-miR167a-3p	OS05T0482700-01	4
osa-miR396c-3p	OS05T0512301-00	4
osa-miR2871b	OS05T0535900-01	4
osa-miR5150-3p	OS05T0536400-01	4
osa-miR5150-5p	OS05T0540900-01	4
osa-miR528-3p	OS05T0542100-01	4
osa-miR159f	OS05T0549100-02	4
osa-miR5144-5p	OS05T0552500-02	4
osa-miR399j	OS05T0557700-01	4
osa-miR156j-5p	OS05T0562200-01	4
osa-miR166e-5p	OS06T0102700-01	2
osa-miR1846d-3p	OS06T0104000-01	2
osa-miR156l-5p	OS06T0143000-01	2
osa-miR528-5p	OS06T0154200-01	0
osa-miR528-5p	OS06T0216700-01	0
osa-miR166h-3p	OS06T0225200-01	4
osa-miR1432-5p	OS06T0247800-01	4
osa-miR1431	OS06T0251700-01	4
osa-miR159f	OS06T0303800-01	2
osa-miR164e	OS06T0305400-01	4
osa-miR7694-3p	OS06T0308300-01	4
osa-miR528-3p	OS06T0323100-01	4
osa-miR530-5p	OS06T0325500-02	4
osa-miR160a-3p	OS06T0329900-01	4
osa-miR529a	OS06T0472700-02	4
osa-miR1870-5p	OS06T0497600-01	4
osa-miR530-5p	OS06T0565900-01	4
osa-miR528-5p	OS06T0567900-01	0
osa-miR159f	OS06T0605600-01	1
osa-miR1432-3p	OS06T0611900-01	2
osa-miR166c-5p	OS06T0638200-01	2
osa-miR1876	OS06T0647400-02	4
osa-miR156f-5p	OS06T0663500-00	0
osa-miR156g-5p	OS06T0674000-01	4
osa-miR164e	OS06T0675600-01	0
osa-miR530-5p	OS06T0691800-01	4
osa-miR319b	OS06T0729900-00	2
osa-miR393b-3p	OS07T0113700-01	4
osa-miR1423-3p	OS07T0122350-00	4
osa-miR394	OS07T0122400-01	4
osa-miR167c-3p	OS07T0143600-01	4
osa-miR319b	OS07T0152000-00	4
osa-miR1856	OS07T0152800-01	4
osa-miR169g	OS07T0158500-00	0
osa-miR529a	OS07T0160300-01	4
osa-miR1863b.2	OS07T0164600-01	4
osa-miR530-5p	OS07T0268800-01	4
osa-miR5156	OS07T0280200-01	4
osa-miR166k-5p	OS07T0287400-01	4
osa-miR156j-5p	OS07T0456700-01	4
osa-miR1862c	OS07T0466200-02	4
osa-miR1873	OS07T0496300-01	4
osa-miR156c-5p	OS07T0516900-03	4
osa-miR1862b	OS07T0562800-02	4
osa-miR529a	OS07T0573700-01	4
osa-miR166c-5p	OS07T0580200-01	4
osa-miR1863b.2	OS07T0581000-01	4
osa-miR1846d-3p	OS07T0598000-01	4
osa-miR169g	OS07T0608200-01	0
osa-miR167c-3p	OS07T0645400-02	4
osa-miR812h	OS07T0649200-01	4
osa-miR5788	OS07T0681700-01	4
osa-miR159f	OS07T0694000-01	4
osa-miR530-5p	OS08T0103300-02	4
osa-miR2876-3p	OS08T0104100-01	4
osa-miR2871a-3p	OS08T0109000-01	2
osa-miR1866-3p	OS08T0119500-01	4
osa-miR820c	OS08T0157600-01	4
osa-miR166c-5p	OS08T0157800-01	4
osa-miR160f-3p	OS08T0175200-01	4
osa-miR7695-3p	OS08T0199300-01	2
osa-miR2871b	OS08T0203900-01	4
osa-miR166g-5p	OS08T0215300-01	2
osa-miR394	OS08T0224100-01	4
osa-miR5794	OS08T0224200-01	4
osa-miR2876-3p	OS08T0258200-02	4
osa-miR399i	OS08T0290400-01	4
osa-miR1866-3p	OS08T0300200-02	2
osa-miR1866-3p	OS08T0319900-01	4
osa-miR396b-3p	OS08T0359200-02	4
osa-miR166a-5p	OS08T0433100-01	4
osa-miR156l-5p	OS08T0509600-01	0
osa-miR530-5p	OS08T0510700-01	4
osa-miR1882e-3p	OS08T0512700-01	4
osa-miR396c-5p	OS08T0513300-01	4
osa-miR528-5p	OS08T0539300-01	2
osa-miR7695-5p	OS09T0109150-00	4
osa-miR396c-3p	OS09T0133200-02	4
osa-miR1856	OS09T0274900-01	4
osa-miR1863b	OS09T0281900-01	4
osa-miR2871a-3p	OS09T0314333-00	4
osa-miR159f	OS09T0322200-01	4
osa-miR166d-5p	OS09T0323500-01	4
osa-miR812j	OS09T0333600-02	4
osa-miR529a	OS09T0392700-01	4
osa-miR160f-5p	OS09T0420100-01	4
osa-miR1431	OS09T0460100-01	4
osa-miR396c-5p	OS09T0471800-01	4
osa-miR166l-5p	OS09T0491100-03	4
osa-miR156l-5p	OS09T0491532-01	4
osa-miR159f	OS09T0497400-02	4
osa-miR396c-5p	OS09T0501200-01	2
osa-miR156l-5p	OS09T0507100-00	4
osa-miR166d-5p	OS09T0563200-01	4
osa-miR166k-5p	OS09T0565400-01	1
osa-miR167b	OS09T0567700-01	4
osa-miR160b-5p	OS09T0572400-01	4
osa-miR5814	OS10T0132700-01	2
osa-miR812j	OS10T0134250-01	4
osa-miR2871b	OS10T0205300-01	4
osa-miR166g-5p	OS10T0206800-01	4
osa-miR159f	OS10T0370800-01	4
osa-miR5788	OS10T0406701-01	4
osa-miR440	OS10T0430900-01	4
osa-miR528-3p	OS10T0454200-01	2
osa-miR396c-5p	OS10T0463800-01	1
osa-miR2874	OS10T0466000-02	4
osa-miR5159	OS10T0496000-02	4
osa-miR166l-5p	OS10T0508400-01	4
osa-miR1431	OS10T0512500-02	4
osa-miR5150-3p	OS10T0521600-01	4
osa-miR319b	OS10T0524400-03	4
osa-miR1860-3p	OS10T0536100-01	4
osa-miR5794	OS10T0543500-01	4
osa-miR530-3p	OS10T0551800-00	4
osa-miR530-3p	OS10T0551900-01	4
osa-miR530-3p	OS10T0552600-01	4
osa-miR530-3p	OS10T0552800-01	2
osa-miR394	OS10T0554900-01	4
osa-miR5788	OS11T0116000-01	3
osa-miR156l-5p	OS11T0126100-01	4
osa-miR530-5p	OS11T0145400-01	4
osa-miR160f-3p	OS11T0167800-01	2
osa-miR812j	OS11T0199000-01	4
osa-miR396a-5p	OS11T0303500-01	4
osa-miR393b-3p	OS11T0414000-01	4
osa-miR167a-3p	OS11T0482100-01	4
osa-miR156l-5p	OS11T0496600-00	0
osa-miR530-5p	OS11T0516400-01	4
osa-miR393b-3p	OS11T0522900-01	4
osa-miR1432-3p	OS11T0538900-01	4
osa-miR812j	OS11T0550300-01	4
osa-miR2871b	OS11T0562100-01	4
osa-miR159f	OS11T0569600-01	1
osa-miR156l-3p	OS11T0591100-01	4
osa-miR399j	OS11T0593700-01	4
osa-miR1863b.2	OS12T0102500-01	4
osa-miR5788	OS12T0105800-01	4
osa-miR1862d	OS12T0115300-01	4
osa-miR160d-3p	OS12T0123500-01	4
osa-miR156l-5p	OS12T0125800-00	4
osa-miR394	OS12T0133600-01	4
osa-miR530-5p	OS12T0143100-01	4
osa-miR164e	OS12T0147800-01	2
osa-miR399j	OS12T0154000-02	4
osa-miR156f-3p	OS12T0174200-01	4
osa-miR399j	OS12T0175700-01	4
osa-miR166l-5p	OS12T0182300-01	4
osa-miR159f	OS12T0192500-02	4
osa-miR529a	OS12T0236500-02	4
osa-miR166e-5p	OS12T0249900-01	4
osa-miR167c-3p	OS12T0263050-00	1
osa-miR167a-3p	OS12T0430000-00	4
osa-miR5144-5p	OS12T0502000-01	4
osa-miR1866-3p	OS12T0507200-01	3
osa-miR160c-3p	OS12T0556200-01	4
osa-miR1846d-3p	OS12T0573900-01	4
osa-miR164e	OS12T0610600-01	0
osa-miR166k-5p	OS12T0612100-01	4
osa-miR169g	OS12T0618600-01	0
